# Supplementary material
Source: PubMed Central journal article supplement (PMC2889559)
Supplement: 0914709107_stxt01.pdf [file 0914709107_stxt01.pdf]

**Table S1.** *Cis*- and *trans*-eQTL distribution in poplar leaves, xylem and roots

| Tissue       | Category        | Total # <sup>a</sup> | # Cis <sup>b</sup> | # Trans <sup>c</sup> | # Ambiguous <sup>d</sup> |
|--------------|-----------------|----------------------|--------------------|----------------------|--------------------------|
| <i>Xylem</i> | Genes with eQTL | 30,313               | 2,398              | 16,353               | 11,562                   |
|              | eQTL            | 36,071               | 2,408              | 18,684               | 14,979                   |
| <i>Leaf</i>  | Genes with eQTL | 12,392               | 3,509              | 4,178                | 4,705                    |
|              | eQTL            | 13,403               | 3,528              | 4,500                | 5,375                    |
| <i>Root</i>  | Genes with eQTL | 8,534                | 2,156              | 3,120                | 3,258                    |
|              | eQTL            | 9,137                | 2,161              | 3,321                | 3,655                    |

<sup>a</sup>. The permutation-derived LOD thresholds for eQTL significance were 2.89 for xylem, 2.92 for leaf, and 2.93 for root.

<sup>b</sup>. A gene was declared as having a *cis*-eQTL if the eQTL peak overlapped at any point with the genetic interval containing the corresponding gene model in the genome, as defined by its flanking SSR, SFP or GEM markers.

<sup>c</sup>. A gene was declared as having a *trans*-eQTL if the eQTL did not overlap at any point with the genetic interval containing the corresponding gene model in the genome, as defined by its flanking SSR, SFP or GEM markers.

<sup>d</sup>. A gene was declared as having an ambiguous eQTL if the position of the corresponding gene model was not flanked on both sides by SSR, SFP, or GEM markers, or if the gene resided on an unplaced genomic sequence scaffold from the genome assembly.

**Table S2.** Significant eQTL hotspots by linkage group in each of the three tissues

| Linkage group | Total Gene Models (GMs) | Total GMs covered by map | Total xylem hotspot bins <sup>a</sup> | Total leaf hotspot bins <sup>b</sup> | Total root hotspot bins <sup>c</sup> |
|---------------|-------------------------|--------------------------|---------------------------------------|--------------------------------------|--------------------------------------|
| 1             | 4181                    | 3469                     | 12                                    | 10                                   | 6                                    |
| 2             | 2940                    | 2856                     | 1                                     | 2                                    | 0                                    |
| 3             | 2097                    | 1854                     | 0                                     | 2                                    | 3                                    |
| 4             | 2040                    | 1881                     | 0                                     | 0                                    | 2                                    |
| 5             | 2402                    | 2081                     | 3                                     | 2                                    | 5                                    |
| 6             | 2526                    | 2412                     | 3                                     | 6                                    | 5                                    |
| 7             | 1466                    | 1302                     | 0                                     | 1                                    | 0                                    |
| 8             | 2169                    | 2148                     | 1                                     | 2                                    | 3                                    |
| 9             | 1749                    | 1667                     | 21                                    | 9                                    | 11                                   |
| 10            | 2586                    | 1749                     | 0                                     | 6                                    | 1                                    |
| 11            | 1624                    | 1300                     | 3                                     | 14                                   | 3                                    |
| 12            | 1478                    | 648                      | 0                                     | 1                                    | 6                                    |
| 13            | 1703                    | 2323                     | 0                                     | 5                                    | 9                                    |
| 14            | 2391                    | 1916                     | 6                                     | 14                                   | 10                                   |
| 15            | 1377                    | 1076                     | 10                                    | 4                                    | 0                                    |
| 16            | 1528                    | 1501                     | 0                                     | 14                                   | 9                                    |
| 17            | 1074                    | 489                      | 7                                     | 1                                    | 8                                    |
| 18            | 1425                    | 736                      | 0                                     | 1                                    | 1                                    |
| 19            | 1311                    | 1269                     | 0                                     | 3                                    | 6                                    |
| <b>Total</b>  | <b>38067</b>            | <b>32677</b>             | <b>67</b>                             | <b>97</b>                            | <b>88</b>                            |

<sup>a</sup>. The permutation-derived hotspot threshold value for xylem was 39 eQTL

<sup>b</sup>. The permutation-derived hotspot threshold value for leaf was 21 eQTL

<sup>c</sup>. The permutation-derived hotspot threshold value for root was 16 eQTL

**Table S3.** Shared hotspots and their gene members between xylem, leaf and root.

| Linkage group                           | Bin # | Xylem eQTL |          | Leaf eQTL |          | Root eQTL |          | Gene models shared |
|-----------------------------------------|-------|------------|----------|-----------|----------|-----------|----------|--------------------|
|                                         |       | Cis        | Trans/Am | Cis       | Trans/Am | Cis       | Trans/Am |                    |
| Hotspots shared by xylem, leaf and root |       |            |          |           |          |           |          |                    |
| 5                                       | 708   | 7          | 205      | 4         | 21       | 0         | 24       | 0                  |
| 8                                       | 1014  | 6          | 35       | 13        | 9        | 6         | 22       | 3                  |
| Hotspots shared by xylem and leaf only  |       |            |          |           |          |           |          |                    |
| 1                                       | 1     | 6          | 77       | 10        | 204      |           |          | 2                  |
| 2                                       | 276   | 4          | 59       | 9         | 23       |           |          | 4                  |
| 9                                       | 1015  | 8          | 114      | 8         | 19       |           |          | 3                  |
| 9                                       | 1020  | 1          | 52       | 2         | 20       |           |          | 0                  |
| 9                                       | 1023  | 4          | 39       | 4         | 25       |           |          | 0                  |
| 9                                       | 1028  | 2          | 61       | 4         | 29       |           |          | 0                  |
| 9                                       | 1030  | 6          | 35       | 3         | 22       |           |          | 1                  |
| Hotspots shared by xylem and root only  |       |            |          |           |          |           |          |                    |
| 1                                       | 131   | 6          | 34       |           |          | 1         | 41       | 0                  |
| 9                                       | 1093  | 4          | 504      |           |          | 0         | 218      | 0                  |
| 9                                       | 1094  | 2          | 1137     |           |          | 0         | 129      | 3                  |
| 9                                       | 1095  | 6          | 3291     |           |          | 0         | 68       | 0                  |
| 9                                       | 1096  | 22         | 14132    |           |          | 0         | 65       | 14                 |
| 11                                      | 1263  | 9          | 68       |           |          | 2         | 17       | 2                  |
| 14                                      | 1395  | 13         | 799      |           |          | 1         | 57       | 0                  |
| 14                                      | 1396  | 6          | 140      |           |          | 0         | 19       | 0                  |
| 14                                      | 1397  | 1          | 76       |           |          | 2         | 23       | 0                  |
| 14                                      | 1398  | 0          | 52       |           |          | 0         | 20       | 0                  |
| 14                                      | 1399  | 0          | 180      |           |          | 0         | 19       | 0                  |
| 17                                      | 1664  | 2          | 83       |           |          | 0         | 33       | 1                  |
| Hotspots shared by leaf and root only   |       |            |          |           |          |           |          |                    |
| 5                                       | 682   |            |          | 10        | 12       | 16        | 1        | 0                  |
| 7                                       | 838   |            |          | 9         | 16       | 3         | 15       | 1                  |
| 11                                      | 1222  |            |          | 12        | 156      | 7         | 11       | 9                  |
| 13                                      | 1333  |            |          | 9         | 27       | 3         | 63       | 1                  |
| 14                                      | 1498  |            |          | 12        | 25       | 13        | 37       | 20                 |
| 16                                      | 1628  |            |          | 9         | 21       | 7         | 14       | 3                  |
| 19                                      | 1783  |            |          | 12        | 25       | 8         | 33       | 4                  |

**Table S4.** Overlap in gene memberships between three hotspots detected in adjacent map bins in xylem

| Bin #1017                         | Bin #1018                         | Bin #1019                         |
|-----------------------------------|-----------------------------------|-----------------------------------|
| fgenes1_pg.C_scaffold_6396000001  |                                   |                                   |
| fgenes4_pg.C_LG_VI000364          |                                   |                                   |
| fgenes4_pg.C_LG_VI001806          |                                   |                                   |
| fgenes4_pg.C_scaffold_21822000001 |                                   |                                   |
| gw1.IV.4594.1                     |                                   |                                   |
| gw1.XIII.2478.1                   |                                   |                                   |
|                                   | eugene3.00002146                  | eugene3.00002146                  |
| eugene3.00030422                  | eugene3.00030422                  | eugene3.00030422                  |
| eugene3.00070624                  | eugene3.00070624                  | eugene3.00070624                  |
|                                   | eugene3.00071319                  | eugene3.00071319                  |
|                                   |                                   | eugene3.00081469                  |
| eugene3.00110439                  | eugene3.00110439                  | eugene3.00110439                  |
| eugene3.00110621                  | eugene3.00110621                  | eugene3.00110621                  |
|                                   |                                   | eugene3.00170228                  |
|                                   | eugene3.00180606                  | eugene3.00180606                  |
| eugene3.00280298                  | eugene3.00280298                  |                                   |
| eugene3.01170034                  | eugene3.01170034                  | eugene3.01170034                  |
| eugene3.01800030                  | eugene3.01800030                  | eugene3.01800030                  |
| eugene3.02140013                  | eugene3.02140013                  | eugene3.02140013                  |
| eugene3.02390004                  | eugene3.02390004                  | eugene3.02390004                  |
| eugene3.02460001                  | eugene3.02460001                  | eugene3.02460001                  |
| eugene3.02510003                  | eugene3.02510003                  | eugene3.02510003                  |
| eugene3.03410004                  | eugene3.03410004                  | eugene3.03410004                  |
|                                   |                                   | eugene3.03760007                  |
| eugene3.04440001                  | eugene3.04440001                  | eugene3.04440001                  |
| eugene3.06350004                  | eugene3.06350004                  | eugene3.06350004                  |
| eugene3.06530001                  | eugene3.06530001                  | eugene3.06530001                  |
|                                   | eugene3.08730001                  | eugene3.08730001                  |
| eugene3.113410001                 | eugene3.113410001                 | eugene3.113410001                 |
| eugene3.17700001                  | eugene3.17700001                  | eugene3.17700001                  |
| eugene3.36030002                  | eugene3.36030002                  |                                   |
| eugene3.47870001                  | eugene3.47870001                  | eugene3.47870001                  |
|                                   |                                   | eugene3.56740001                  |
| eugene3.70910001                  | eugene3.70910001                  | eugene3.70910001                  |
| eugene3.98910001                  | eugene3.98910001                  | eugene3.98910001                  |
|                                   |                                   | fgenes1_pg.C_LG_I001103           |
| fgenes1_pg.C_LG_I003024           | fgenes1_pg.C_LG_I003024           | fgenes1_pg.C_LG_I003024           |
| fgenes1_pg.C_LG_IV000363          | fgenes1_pg.C_LG_IV000363          | fgenes1_pg.C_LG_IV000363          |
| fgenes1_pg.C_LG_XII000630         | fgenes1_pg.C_LG_XII000630         |                                   |
| fgenes1_pg.C_LG_XIV001169         | fgenes1_pg.C_LG_XIV001169         | fgenes1_pg.C_LG_XIV001169         |
| fgenes1_pg.C_scaffold_107000005   | fgenes1_pg.C_scaffold_107000005   | fgenes1_pg.C_scaffold_107000005   |
| fgenes1_pg.C_scaffold_10998000001 | fgenes1_pg.C_scaffold_10998000001 | fgenes1_pg.C_scaffold_10998000001 |
| fgenes1_pg.C_scaffold_1383000002  | fgenes1_pg.C_scaffold_1383000002  |                                   |
| fgenes1_pg.C_scaffold_17695000001 | fgenes1_pg.C_scaffold_17695000001 | fgenes1_pg.C_scaffold_17695000001 |
| fgenes1_pg.C_scaffold_188000012   | fgenes1_pg.C_scaffold_188000012   | fgenes1_pg.C_scaffold_188000012   |

|                                   |                                   |                                   |
|-----------------------------------|-----------------------------------|-----------------------------------|
| fgenes1_pg.C_scaffold_399000009   | fgenes1_pg.C_scaffold_2495000001  | fgenes1_pg.C_scaffold_2495000001  |
| fgenes1_pg.C_scaffold_4167000001  | fgenes1_pg.C_scaffold_399000009   | fgenes1_pg.C_scaffold_294000002   |
|                                   | fgenes1_pg.C_scaffold_4167000001  | fgenes1_pg.C_scaffold_399000009   |
| fgenes1_pg.C_scaffold_5705000001  | fgenes1_pg.C_scaffold_519000002   | fgenes1_pg.C_scaffold_4167000001  |
| fgenes1_pg.C_scaffold_5891000001  | fgenes1_pg.C_scaffold_5705000001  | fgenes1_pg.C_scaffold_519000002   |
| fgenes1_pg.C_scaffold_8363000001  | fgenes1_pg.C_scaffold_5891000001  | fgenes1_pg.C_scaffold_5705000001  |
| fgenes1_pg.C_scaffold_8415000001  | fgenes1_pg.C_scaffold_8363000001  | fgenes1_pg.C_scaffold_5891000001  |
| fgenes1_pg.C_scaffold_8489000001  | fgenes1_pg.C_scaffold_8415000001  | fgenes1_pg.C_scaffold_8363000001  |
| fgenes1_pg.C_scaffold_9755000001  | fgenes1_pg.C_scaffold_8489000001  | fgenes1_pg.C_scaffold_8415000001  |
| fgenes1_pm.C_LG_XVII000079        | fgenes1_pg.C_scaffold_9755000001  | fgenes1_pg.C_scaffold_9755000001  |
| fgenes4_pg.C_LG_I001163           | fgenes1_pm.C_LG_XVII000079        | fgenes1_pm.C_LG_XVII000079        |
|                                   | fgenes4_pg.C_LG_I001163           | fgenes4_pg.C_LG_I001163           |
|                                   |                                   | fgenes4_pg.C_LG_V001055           |
| fgenes4_pg.C_LG_X001199           | fgenes4_pg.C_LG_VII000249         | fgenes4_pg.C_LG_VII000249         |
| fgenes4_pg.C_LG_XII000557         | fgenes4_pg.C_LG_X001199           | fgenes4_pg.C_LG_X001199           |
| fgenes4_pg.C_LG_XIX000501         | fgenes4_pg.C_LG_XII000557         | fgenes4_pg.C_LG_XII000557         |
| fgenes4_pg.C_LG_XVI000982         | fgenes4_pg.C_LG_XIX000501         | fgenes4_pg.C_LG_XIX000501         |
| fgenes4_pg.C_scaffold_12767000001 | fgenes4_pg.C_LG_XVI000982         | fgenes4_pg.C_LG_XVI000982         |
| fgenes4_pg.C_scaffold_13692000001 | fgenes4_pg.C_scaffold_12767000001 | fgenes4_pg.C_scaffold_12767000001 |
| fgenes4_pg.C_scaffold_14088000001 | fgenes4_pg.C_scaffold_13692000001 | fgenes4_pg.C_scaffold_13692000001 |
| fgenes4_pg.C_scaffold_14737000001 | fgenes4_pg.C_scaffold_14088000001 | fgenes4_pg.C_scaffold_14088000001 |
| fgenes4_pg.C_scaffold_168000005   | fgenes4_pg.C_scaffold_14737000001 | fgenes4_pg.C_scaffold_14737000001 |
| fgenes4_pg.C_scaffold_16975000001 | fgenes4_pg.C_scaffold_168000005   | fgenes4_pg.C_scaffold_168000005   |
| fgenes4_pg.C_scaffold_17724000001 | fgenes4_pg.C_scaffold_16975000001 | fgenes4_pg.C_scaffold_16975000001 |
| fgenes4_pg.C_scaffold_19937000001 | fgenes4_pg.C_scaffold_17724000001 | fgenes4_pg.C_scaffold_17724000001 |
| fgenes4_pg.C_scaffold_2068000001  | fgenes4_pg.C_scaffold_19937000001 | fgenes4_pg.C_scaffold_19937000001 |
| fgenes4_pg.C_scaffold_283000002   | fgenes4_pg.C_scaffold_2068000001  | fgenes4_pg.C_scaffold_2068000001  |
|                                   | fgenes4_pg.C_scaffold_283000002   |                                   |
| fgenes4_pg.C_scaffold_3631000002  | fgenes4_pg.C_scaffold_297000003   | fgenes4_pg.C_scaffold_297000003   |
| fgenes4_pg.C_scaffold_413000002   | fgenes4_pg.C_scaffold_3631000002  | fgenes4_pg.C_scaffold_3631000002  |
| fgenes4_pg.C_scaffold_438000004   | fgenes4_pg.C_scaffold_413000002   | fgenes4_pg.C_scaffold_413000002   |
| fgenes4_pg.C_scaffold_4775000001  | fgenes4_pg.C_scaffold_438000004   | fgenes4_pg.C_scaffold_438000004   |
| fgenes4_pg.C_scaffold_4787000001  | fgenes4_pg.C_scaffold_4775000001  |                                   |
| fgenes4_pg.C_scaffold_5250000001  | fgenes4_pg.C_scaffold_4787000001  | fgenes4_pg.C_scaffold_5250000001  |
| fgenes4_pg.C_scaffold_5487000002  | fgenes4_pg.C_scaffold_5250000001  | fgenes4_pg.C_scaffold_5487000002  |
| fgenes4_pg.C_scaffold_5695000001  | fgenes4_pg.C_scaffold_5487000002  | fgenes4_pg.C_scaffold_5487000002  |
|                                   | fgenes4_pg.C_scaffold_5695000001  | fgenes4_pg.C_scaffold_5695000001  |
|                                   |                                   | fgenes4_pg.C_scaffold_626000004   |
| fgenes4_pg.C_scaffold_6929000001  | fgenes4_pg.C_scaffold_666000001   | fgenes4_pg.C_scaffold_666000001   |
| fgenes4_pg.C_scaffold_839000001   | fgenes4_pg.C_scaffold_6929000001  | fgenes4_pg.C_scaffold_6929000001  |
| fgenes4_pg.C_scaffold_8484000001  | fgenes4_pg.C_scaffold_839000001   | fgenes4_pg.C_scaffold_839000001   |
| fgenes4_pg.C_scaffold_8721000001  | fgenes4_pg.C_scaffold_8484000001  |                                   |
| fgenes4_pg.C_scaffold_8750000001  | fgenes4_pg.C_scaffold_8721000001  | fgenes4_pg.C_scaffold_8721000001  |
| fgenes4_pg.C_scaffold_8928000001  | fgenes4_pg.C_scaffold_8750000001  | fgenes4_pg.C_scaffold_8750000001  |
| fgenes4_pg.C_scaffold_9091000001  | fgenes4_pg.C_scaffold_8928000001  | fgenes4_pg.C_scaffold_8928000001  |
| fgenes4_pg.C_scaffold_9925000001  | fgenes4_pg.C_scaffold_9091000001  | fgenes4_pg.C_scaffold_9091000001  |
|                                   | fgenes4_pg.C_scaffold_9925000001  | fgenes4_pg.C_scaffold_9925000001  |

| fgenes4_pg.C_scaffold_994000003 | fgenes4_pg.C_scaffold_994000003 | fgenes4_pg.C_scaffold_994000003 |
|---------------------------------|---------------------------------|---------------------------------|
| grail3.0016012001               | grail3.0012027101               | grail3.0012027101               |
| grail3.0120000601               | grail3.0016012001               | grail3.0016012001               |
| grail3.0200000402               | grail3.0038012201               | grail3.0038012201               |
| grail3.0218000801               | grail3.0120000601               | grail3.0120000601               |
| grail3.0297000101               | grail3.0200000402               | grail3.0200000402               |
| grail3.0982000101               | grail3.0218000801               | grail3.0218000801               |
| grail3.21358000101              | grail3.0297000101               | grail3.0297000101               |
|                                 | grail3.0982000101               | grail3.0982000101               |
| grail3.3927000101               | grail3.21358000101              | grail3.21358000101              |
| grail3.7295000101               | grail3.3124000101               | grail3.3124000101               |
| gw1.1132.2.1                    | grail3.3927000101               |                                 |
| gw1.13678.2.1                   | grail3.7295000101               | grail3.7295000101               |
| gw1.1376.5.1                    | gw1.1132.2.1                    | gw1.1132.2.1                    |
| gw1.1412.1.1                    | gw1.13678.2.1                   | gw1.13678.2.1                   |
| gw1.148.31.1                    | gw1.1376.5.1                    | gw1.1376.5.1                    |
| gw1.149.11.1                    | gw1.1412.1.1                    | gw1.1412.1.1                    |
| gw1.149.12.1                    | gw1.148.31.1                    | gw1.148.31.1                    |
|                                 | gw1.149.11.1                    | gw1.149.11.1                    |
|                                 | gw1.149.12.1                    | gw1.149.12.1                    |
|                                 |                                 | gw1.157.105.1                   |
|                                 |                                 | gw1.187.90.1                    |
|                                 |                                 | gw1.254.37.1                    |
|                                 |                                 | gw1.309.19.1                    |
| gw1.345.6.1                     |                                 | gw1.345.6.1                     |
| gw1.3471.1.1                    | gw1.345.6.1                     |                                 |
|                                 | gw1.3471.1.1                    |                                 |
|                                 |                                 | gw1.4226.1.1                    |
| gw1.4273.1.1                    | gw1.4273.1.1                    | gw1.4273.1.1                    |
| gw1.4747.1.1                    | gw1.4747.1.1                    | gw1.4747.1.1                    |
| gw1.5562.1.1                    | gw1.5562.1.1                    | gw1.5562.1.1                    |
|                                 | gw1.635.6.1                     | gw1.635.6.1                     |
| gw1.64.59.1                     | gw1.64.59.1                     | gw1.64.59.1                     |
| gw1.6575.3.1                    | gw1.6575.3.1                    | gw1.6575.3.1                    |
| gw1.666.3.1                     | gw1.666.3.1                     | gw1.666.3.1                     |
| gw1.754.1.1                     | gw1.754.1.1                     | gw1.754.1.1                     |
| gw1.803.10.1                    | gw1.803.10.1                    |                                 |
| gw1.I.314.1                     | gw1.I.314.1                     | gw1.I.314.1                     |
| gw1.I.502.1                     | gw1.I.502.1                     | gw1.I.502.1                     |
| gw1.III.2477.1                  | gw1.III.2477.1                  | gw1.III.2477.1                  |
|                                 | gw1.IV.1626.1                   | gw1.IV.1626.1                   |
|                                 | gw1.V.4840.1                    | gw1.V.4840.1                    |
| gw1.VII.2048.1                  | gw1.VII.2048.1                  | gw1.VII.2048.1                  |
| gw1.VII.2057.1                  | gw1.VII.2057.1                  | gw1.VII.2057.1                  |
| gw1.VII.2586.1                  | gw1.VII.2586.1                  | gw1.VII.2586.1                  |
|                                 |                                 | gw1.VIII.58.1                   |
| gw1.X.3063.1                    | gw1.X.3063.1                    | gw1.X.3063.1                    |
| gw1.X.5036.1                    | gw1.X.5036.1                    |                                 |
| gw1.XI.2194.1                   | gw1.XI.2194.1                   | gw1.XI.2194.1                   |

|                 |                 |                 |
|-----------------|-----------------|-----------------|
| gw1.XIII.1845.1 | gw1.XIII.1845.1 | gw1.XIII.1845.1 |
| gw1.XIV.33.1    | gw1.XIV.33.1    | gw1.XIV.33.1    |
| gw1.XVI.163.1   | gw1.XVI.163.1   | gw1.XVI.163.1   |
| gw1.XVI.2600.1  | gw1.XVI.2600.1  | gw1.XVI.2600.1  |































































































































|    |        |      |    |   |         |               |              |             |                        |                                    |     |           |                                                                                      |
|----|--------|------|----|---|---------|---------------|--------------|-------------|------------------------|------------------------------------|-----|-----------|--------------------------------------------------------------------------------------|
| LF | LF1450 | 1450 | 14 | 6 | 27.5548 | G1292 - G2080 | LG_14 - 4.71 | LG_14 - 7.1 | E_POPLARS55700P389892  | fgenes_h1_pg.C_scaffold_9722000001 | 4   |           |                                                                                      |
| LF | LF1450 | 1450 | 14 | 6 | 27.5548 | G1292 - G2080 | LG_14 - 4.71 | LG_14 - 7.1 | E_POPLARS55298P387073  | fgenes_h1_pg.C_scaffold_989000001  | 7   |           |                                                                                      |
| LF | LF1450 | 1450 | 14 | 6 | 27.5548 | G1292 - G2080 | LG_14 - 4.71 | LG_14 - 7.1 | E_POPLARS55350P373440  | fgenes_h1_pm.C_LG_IV000250         | 225 |           |                                                                                      |
| LF | LF1450 | 1450 | 14 | 6 | 27.5548 | G1292 - G2080 | LG_14 - 4.71 | LG_14 - 7.1 | E_POPLARS553234P372628 | fgenes_h1_pm.C_LG_V000242134       |     |           |                                                                                      |
| LF | LF1450 | 1450 | 14 | 6 | 27.5548 | G1292 - G2080 | LG_14 - 4.71 | LG_14 - 7.1 | E_POPLARS551342P359381 | fgenes_h1_pm.C_scaffold_1170000015 | 415 |           |                                                                                      |
| LF | LF1450 | 1450 | 14 | 6 | 27.5548 | G1292 - G2080 | LG_14 - 4.71 | LG_14 - 7.1 | E_POPLARS551225P358564 | fgenes_h1_pm.C_scaffold_1340000007 | 308 |           |                                                                                      |
| LF | LF1450 | 1450 | 14 | 6 | 27.5548 | G1292 - G2080 | LG_14 - 4.71 | LG_14 - 7.1 | E_POPLARS551144P357999 | fgenes_h1_pm.C_scaffold_1490000005 | 104 |           |                                                                                      |
| LF | LF1450 | 1450 | 14 | 6 | 27.5548 | G1292 - G2080 | LG_14 - 4.71 | LG_14 - 7.1 | E_POPLARS551127P357881 | fgenes_h1_pm.C_scaffold_1500000025 | 320 |           |                                                                                      |
| LF | LF1450 | 1450 | 14 | 6 | 27.5548 | G1292 - G2080 | LG_14 - 4.71 | LG_14 - 7.1 | E_POPLARS54493P381442  | fgenes_h1_pm.C_scaffold_1950000001 | 421 |           |                                                                                      |
| LF | LF1450 | 1450 | 14 | 6 | 27.5548 | G1292 - G2080 | LG_14 - 4.71 | LG_14 - 7.1 | E_POPLARS54906P384329  | fgenes_h1_pm.C_scaffold_4032000001 | 278 |           |                                                                                      |
| LF | LF1450 | 1450 | 14 | 6 | 27.5548 | G1292 - G2080 | LG_14 - 4.71 | LG_14 - 7.1 | E_POPLARS55203P386408  | fgenes_h1_pm.C_scaffold_787000001  | 423 |           |                                                                                      |
| LF | LF1450 | 1450 | 14 | 6 | 27.5548 | G1292 - G2080 | LG_14 - 4.71 | LG_14 - 7.1 | E_POPLARS43081P301561  | fgenes_h4_pg.C_LG_I000317          | 490 |           |                                                                                      |
| LF | LF1450 | 1450 | 14 | 6 | 27.5548 | G1292 - G2080 | LG_14 - 4.71 | LG_14 - 7.1 | E_POPLARS12313P086191  | fgenes_h4_pg.C_LG_I000442          | 1   | AT2G33100 | ATCSLD1                                                                              |
| LF | LF1450 | 1450 | 14 | 6 | 27.5548 | G1292 - G2080 | LG_14 - 4.71 | LG_14 - 7.1 | E_POPLARS12430P087010  | fgenes_h4_pg.C_LG_I001163          | 205 | AT1G58025 | DNA binding                                                                          |
| LF | LF1450 | 1450 | 14 | 6 | 27.5548 | G1292 - G2080 | LG_14 - 4.71 | LG_14 - 7.1 | E_POPLARS43122P301848  | fgenes_h4_pg.C_LG_I001329          | 445 |           |                                                                                      |
| LF | LF1450 | 1450 | 14 | 6 | 27.5548 | G1292 - G2080 | LG_14 - 4.71 | LG_14 - 7.1 | E_POPLARS43126P301882  | fgenes_h4_pg.C_LG_I001356          | 429 |           |                                                                                      |
| LF | LF1450 | 1450 | 14 | 6 | 27.5548 | G1292 - G2080 | LG_14 - 4.71 | LG_14 - 7.1 | E_POPLARS43127P301886  | fgenes_h4_pg.C_LG_I001357          | 406 |           |                                                                                      |
| LF | LF1450 | 1450 | 14 | 6 | 27.5548 | G1292 - G2080 | LG_14 - 4.71 | LG_14 - 7.1 | E_POPLARS12635P088441  | fgenes_h4_pg.C_LG_I002379          | 15  | AT5G14010 | zinc finger (C2H2 type) family protein                                               |
| LF | LF1450 | 1450 | 14 | 6 | 27.5548 | G1292 - G2080 | LG_14 - 4.71 | LG_14 - 7.1 | E_POPLARS12697P088877  | fgenes_h4_pg.C_LG_I002741          | 151 | AT2G33160 | glycoside hydrolase family 28 protein / polygalacturonase (pectinase) family protein |
| LF | LF1450 | 1450 | 14 | 6 | 27.5548 | G1292 - G2080 | LG_14 - 4.71 | LG_14 - 7.1 | E_POPLARS43203P302421  | fgenes_h4_pg.C_LG_I003127          | 241 |           |                                                                                      |
| LF | LF1450 | 1450 | 14 | 6 | 27.5548 | G1292 - G2080 | LG_14 - 4.71 | LG_14 - 7.1 | E_POPLARS43252P302763  | fgenes_h4_pg.C_LG_I00127           |     |           |                                                                                      |

|    |        |      |    |   |         |               |              |             |                       |                                    |     |           |                                                                                                                                                                                                                                                  |
|----|--------|------|----|---|---------|---------------|--------------|-------------|-----------------------|------------------------------------|-----|-----------|--------------------------------------------------------------------------------------------------------------------------------------------------------------------------------------------------------------------------------------------------|
| LF | LF1450 | 1450 | 14 | 6 | 27.5548 | G1292 - G2080 | LG_14 - 4.71 | LG_14 - 7.1 | E_POPLARS44244P309705 | fgenesH4_pg.C_scaffold_11410000001 | 415 |           |                                                                                                                                                                                                                                                  |
| LF | LF1450 | 1450 | 14 | 6 | 27.5548 | G1292 - G2080 | LG_14 - 4.71 | LG_14 - 7.1 | E_POPLARS44250P309744 | fgenesH4_pg.C_scaffold_11458000001 | 422 |           |                                                                                                                                                                                                                                                  |
| LF | LF1450 | 1450 | 14 | 6 | 27.5548 | G1292 - G2080 | LG_14 - 4.71 | LG_14 - 7.1 | E_POPLARS44277P309936 | fgenesH4_pg.C_scaffold_11732000001 | 114 |           |                                                                                                                                                                                                                                                  |
| LF | LF1450 | 1450 | 14 | 6 | 27.5548 | G1292 - G2080 | LG_14 - 4.71 | LG_14 - 7.1 | E_POPLARS34813P243689 | fgenesH4_pg.C_scaffold_118000009   | 1   | AT5G46790 | similar to unknown protein [Arabidopsis thaliana] (TAIR:AT4G17870.1); similar to Streptomyces cyclase/dehydrase family protein [Brassica oleracea] (GB:ABD65631.1); contains InterPro domain Streptomyces cyclase/dehydrase (InterPro:IPR005031) |
| LF | LF1450 | 1450 | 14 | 6 | 27.5548 | G1292 - G2080 | LG_14 - 4.71 | LG_14 - 7.1 | E_POPLARS44287P310005 | fgenesH4_pg.C_scaffold_119000001   | 449 |           |                                                                                                                                                                                                                                                  |
| LF | LF1450 | 1450 | 14 | 6 | 27.5548 | G1292 - G2080 | LG_14 - 4.71 | LG_14 - 7.1 | E_POPLARS34857P243999 | fgenesH4_pg.C_scaffold_120000023   | 1   | AT4G03500 | ankyrin repeat family protein                                                                                                                                                                                                                    |
| LF | LF1450 | 1450 | 14 | 6 | 27.5548 | G1292 - G2080 | LG_14 - 4.71 | LG_14 - 7.1 | E_POPLARS44344P310402 | fgenesH4_pg.C_scaffold_12384000001 | 510 |           |                                                                                                                                                                                                                                                  |
| LF | LF1450 | 1450 | 14 | 6 | 27.5548 | G1292 - G2080 | LG_14 - 4.71 | LG_14 - 7.1 | E_POPLARS44350P310444 | fgenesH4_pg.C_scaffold_12475000001 | 367 |           |                                                                                                                                                                                                                                                  |
| LF | LF1450 | 1450 | 14 | 6 | 27.5548 | G1292 - G2080 | LG_14 - 4.71 | LG_14 - 7.1 | E_POPLARS44356P310489 | fgenesH4_pg.C_scaffold_12549000001 | 478 | AT5G07570 | glycine/proline-rich protein                                                                                                                                                                                                                     |
| LF | LF1450 | 1450 | 14 | 6 | 27.5548 | G1292 - G2080 | LG_14 - 4.71 | LG_14 - 7.1 | E_POPLARS34952P244658 | fgenesH4_pg.C_scaffold_12554000001 | 2   | AT5G46760 | basic helix-loop-helix (bHLH) family protein                                                                                                                                                                                                     |
| LF | LF1450 | 1450 | 14 | 6 | 27.5548 | G1292 - G2080 | LG_14 - 4.71 | LG_14 - 7.1 | E_POPLARS44362P310533 | fgenesH4_pg.C_scaffold_12767000001 | 472 | AT5G07570 | glycine/proline-rich protein                                                                                                                                                                                                                     |
| LF | LF1450 | 1450 | 14 | 6 | 27.5548 | G1292 - G2080 | LG_14 - 4.71 | LG_14 - 7.1 | E_POPLARS44393P310747 | fgenesH4_pg.C_scaffold_132000046   | 369 |           |                                                                                                                                                                                                                                                  |
| LF | LF1450 | 1450 | 14 | 6 | 27.5548 | G1292 - G2080 | LG_14 - 4.71 | LG_14 - 7.1 | E_POPLARS44416P310912 | fgenesH4_pg.C_scaffold_13493000001 | 338 |           |                                                                                                                                                                                                                                                  |
| LF | LF1450 | 1450 | 14 | 6 | 27.5548 | G1292 - G2080 | LG_14 - 4.71 | LG_14 - 7.1 | E_POPLARS44425P310970 | fgenesH4_pg.C_scaffold_13534000001 | 398 |           |                                                                                                                                                                                                                                                  |
| LF | LF1450 | 1450 | 14 | 6 | 27.5548 | G1292 - G2080 | LG_14 - 4.71 | LG_14 - 7.1 | E_POPLARS44427P310986 | fgenesH4_pg.C_scaffold_13579000001 | 305 |           |                                                                                                                                                                                                                                                  |
| LF | LF1450 | 1450 | 14 | 6 | 27.5548 | G1292 - G2080 | LG_14 - 4.71 | LG_14 - 7.1 | E_POPLARS35134P245937 | fgenesH4_pg.C_scaffold_1370000002  | 399 | AT5G05800 | similar to unknown protein [Arabidopsis thaliana] (TAIR:AT3G11290.1); similar to unnamed protein product [Vitis vinifera] (GB:CAO69032.1)                                                                                                        |
| LF | LF1450 | 1450 | 14 | 6 | 27.5548 | G1292 - G2080 | LG_14 - 4.71 | LG_14 - 7.1 | E_POPLARS44457P311196 | fgenesH4_pg.C_scaffold_13821000001 | 328 |           |                                                                                                                                                                                                                                                  |
| LF | LF1450 | 1450 | 14 | 6 | 27.5548 | G1292 - G2080 | LG_14 - 4.71 | LG_14 - 7.1 | E_POPLARS44477P311333 | fgenesH4_pg.C_scaffold_1426000001  | 429 |           |                                                                                                                                                                                                                                                  |
| LF | LF1450 | 1450 | 14 | 6 | 27.5548 | G1292 - G2080 | LG_14 - 4.71 | LG_14 - 7.1 | E_POPLARS44480P311360 | fgenesH4_pg.C_scaffold_14291000001 | 261 |           |                                                                                                                                                                                                                                                  |
| LF | LF1450 | 1450 | 14 | 6 | 27.5548 | G1292 - G2080 | LG_14 - 4.71 | LG_14 - 7.1 | E_POPLARS44492P311439 |                                    |     |           |                                                                                                                                                                                                                                                  |

|    |
|----|
| LF |
|----|

||
||
||



|    |
|----|
| LF |
|----|

||
||
||

|    |    |
|----|----|
| LF | LF |
|----|----|







<

<





||
||
||









<



































































































































































































































































































































































































































































































































































































































































































































































|    |       |     |   |    |        |        |               |                |                |     |            |     |    |      |          |            |                                                         |                                        |                                                                                                                                                                                                                                                                             |
|----|-------|-----|---|----|--------|--------|---------------|----------------|----------------|-----|------------|-----|----|------|----------|------------|---------------------------------------------------------|----------------------------------------|-----------------------------------------------------------------------------------------------------------------------------------------------------------------------------------------------------------------------------------------------------------------------------|
| XY | XY255 | 255 | 1 | 20 | 4.8628 | 4.8628 | rE496 - rE728 | scaffold_216 - | scaffold_305 - | CC1 | GO:0009225 | 891 | 4  | 30   | 3.71E-05 | 9.82E-05   | nucleotide-sugar metabolic process                      | no cis-eQTL-based regulator identified |                                                                                                                                                                                                                                                                             |
| XY | XY255 | 255 | 1 | 20 | 4.8628 | 4.8628 | rE496 - rE728 | scaffold_216 - | scaffold_305 - | CC1 | GO:0005634 | 891 | 39 | 3084 | 4.24E-05 | 9.82E-05   | nucleus polarity specification of adaxial/abaxial axis  | no cis-eQTL-based regulator identified |                                                                                                                                                                                                                                                                             |
| XY | XY255 | 255 | 1 | 20 | 4.8628 | 4.8628 | rE496 - rE728 | scaffold_216 - | scaffold_305 - | CC1 | GO:0009944 | 891 | 4  | 36   | 7.74E-05 | 9.82E-05   | regulation of transcription                             | no cis-eQTL-based regulator identified |                                                                                                                                                                                                                                                                             |
| XY | XY255 | 255 | 1 | 20 | 4.8628 | 4.8628 | rE496 - rE728 | scaffold_216 - | scaffold_305 - | CC1 | GO:0006355 | 891 | 20 | 1174 | 7.56E-05 | 9.82E-05   | specification of organ position                         | no cis-eQTL-based regulator identified |                                                                                                                                                                                                                                                                             |
| XY | XY255 | 255 | 1 | 20 | 4.8628 | 4.8628 | rE496 - rE728 | scaffold_216 - | scaffold_305 - | CC1 | GO:0010159 | 891 | 3  | 8    | 1.35E-05 | 9.82E-05   | transcription factor activity                           | no cis-eQTL-based regulator identified |                                                                                                                                                                                                                                                                             |
| XY | XY255 | 255 | 1 | 20 | 4.8628 | 4.8628 | rE496 - rE728 | scaffold_216 - | scaffold_305 - | CC1 | GO:0003700 | 891 | 40 | 2456 | 8.17E-08 | 9.82E-05   | two-component signal transduction system (phosphorelay) | no cis-eQTL-based regulator identified |                                                                                                                                                                                                                                                                             |
| XY | XY255 | 255 | 1 | 20 | 4.8628 | 4.8628 | rE496 - rE728 | scaffold_216 - | scaffold_305 - | CC1 | GO:0000160 | 891 | 4  | 37   | 8.64E-05 | 9.82E-05   |                                                         | no cis-eQTL-based regulator identified | CSA1 (CONSTITUTIVE SHADE-AVOIDANCE1); ATP binding / protein binding / transmembrane receptor >< disease resistance protein (NBS-LRR class) >< disease resistance protein (NBS-LRR class) >< disease resistance protein (NBS-LRR class) >< RPS2 (RESISTANT TO P. SYRINGAE 2) |
| XY | XY255 | 255 | 1 | 20 | 4.8628 | 4.8628 | rE496 - rE728 | scaffold_216 - | scaffold_305 - | CC2 | GO:0005524 | 91  | 15 | 1938 | 2.11E-12 | 0.00050505 | ATP binding                                             | no cis-eQTL-based regulator identified | CSA1 (CONSTITUTIVE SHADE-AVOIDANCE1); ATP binding / protein binding / transmembrane receptor >< disease resistance protein (NBS-LRR class) >< disease resistance protein (NBS-LRR class) >< RPS2 (RESISTANT TO P. SYRINGAE 2)                                               |
| XY | XY255 | 255 | 1 | 20 | 4.8628 | 4.8628 | rE496 - rE728 | scaffold_216 - | scaffold_305 - | CC2 | GO:0006952 | 91  | 20 | 1100 | 2.00E-23 | 0.00050505 | defense response                                        | no cis-eQTL-based regulator identified | CSA1 (CONSTITUTIVE SHADE-AVOIDANCE1); ATP binding / protein binding / transmembrane receptor >< disease resistance protein (NBS-LRR class) >< disease resistance protein (NBS-LRR class) >< RPS2 (RESISTANT TO P. SYRINGAE 2)                                               |
| XY | XY255 | 255 | 1 | 20 | 4.8628 | 4.8628 | rE496 - rE728 | scaffold_216 - | scaffold_305 - | CC2 | GO:0016045 | 91  | 2  | 11   | 2.23E-05 | 0.00050505 | detection of bacterium                                  | no cis-eQTL-based regulator identified | CSA1 (CONSTITUTIVE SHADE-AVOIDANCE1); ATP binding / protein binding / transmembrane receptor >< disease resistance protein (NBS-LRR class) >< disease resistance protein (NBS-LRR class) >< RPS2 (RESISTANT TO P. SYRINGAE 2)                                               |
| XY | XY255 | 255 | 1 | 20 | 4.8628 | 4.8628 | rE496 - rE728 | scaffold_216 - | scaffold_305 - | CC2 | GO:0006118 | 91  | 4  | 376  | 1.08E-04 | 0.00050505 | electron transport                                      | no cis-eQTL-based regulator identified | CSA1 (CONSTITUTIVE SHADE-AVOIDANCE1); ATP binding / protein binding / transmembrane receptor >< disease resistance protein (NBS-LRR class) >< disease resistance protein (NBS-LRR class) >< RPS2 (RESISTANT TO P. SYRINGAE 2)                                               |
| XY | XY255 | 255 | 1 | 20 | 4.8628 | 4.8628 | rE496 - rE728 | scaffold_216 - | scaffold_305 - | CC2 | GO:0006499 | 91  | 5  | 573  | 3.68E-05 | 0.00050505 | N-terminal protein myristoylation                       | no cis-eQTL-based regulator identified | CSA1 (CONSTITUTIVE SHADE-AVOIDANCE1); ATP binding / protein binding / transmembrane receptor >< disease resistance protein (NBS-LRR class) >< disease resistance protein (NBS-LRR class) >< RPS2 (RESISTANT TO P. SYRINGAE 2)                                               |
| XY | XY255 | 255 | 1 | 20 | 4.8628 | 4.8628 | rE496 - rE728 | scaffold_216 - | scaffold_305 - | CC2 | GO:0017111 | 91  | 8  | 121  | 1.77E-14 | 0.00050505 | nucleoside-triphosphatase activity                      | no cis-eQTL-based regulator identified | CSA1 (CONSTITUTIVE SHADE-AVOIDANCE1); ATP binding / protein binding / transmembrane receptor >< disease resistance protein (NBS-LRR class) >< disease resistance protein (NBS-LRR class) >< RPS2 (RESISTANT TO P. SYRINGAE 2)                                               |
| XY | XY255 | 255 | 1 | 20 | 4.8628 | 4.8628 | rE496 - rE728 | scaffold_216 - | scaffold_305 - | CC2 | GO:0000166 | 91  | 9  | 463  | 2.39E-11 | 0.00050505 | nucleotide binding                                      | no cis-eQTL-based regulator identified | CSA1 (CONSTITUTIVE SHADE-AVOIDANCE1); ATP binding / protein binding / transmembrane receptor >< disease resistance protein (NBS-LRR class) >< disease resistance protein (NBS-LRR class) >< RPS2 (RESISTANT TO P. SYRINGAE 2)                                               |
| XY | XY255 | 255 | 1 | 20 | 4.8628 | 4.8628 | rE496 - rE728 | scaffold_216 - | scaffold_305 - | CC2 | GO:0009626 | 91  | 3  | 132  | 9.00E-05 | 0.00050505 | plant-type hypersensitive response                      | no cis-eQTL-based regulator identified | CSA1 (CONSTITUTIVE SHADE-AVOIDANCE1); ATP binding / protein binding / transmembrane receptor >< disease resistance protein (NBS-LRR class) >< disease resistance protein (NBS-LRR class) >< RPS2 (RESISTANT TO P. SYRINGAE 2)                                               |
| XY | XY255 | 255 | 1 | 20 | 4.8628 | 4.8628 | rE496 - rE728 | scaffold_216 - | scaffold_305 - | CC2 | GO:0005515 | 91  | 18 | 2885 | 3.85E-13 | 0.00050505 | protein binding                                         | no cis-eQTL-based regulator identified | CSA1 (CONSTITUTIVE SHADE-AVOIDANCE1); ATP binding / protein binding / transmembrane receptor >< disease resistance protein (NBS-LRR class) >< disease resistance protein (NBS-LRR class) >< RPS2 (RESISTANT TO P. SYRINGAE 2)                                               |
| XY | XY256 | 256 | 1 | 20 | 4.8828 | 4.8828 | rE496 - rE728 | scaffold_216 - | scaffold_305 - | CC1 | GO:0016208 | 867 | 5  | 23   | 2.58E-07 | 0.00010309 | AMP binding                                             | no cis-eQTL-based regulator identified |                                                                                                                                                                                                                                                                             |
| XY | XY256 | 256 | 1 | 20 | 4.8828 | 4.8828 | rE496 - rE728 | scaffold_216 - | scaffold_305 - | CC1 | GO:0005524 | 867 | 28 | 1938 | 3.58E-05 | 0.00010309 | ATP binding                                             | no cis-eQTL-based regulator identified |                                                                                                                                                                                                                                                                             |
| XY | XY256 | 256 | 1 | 20 | 4.8828 | 4.8828 | rE496 - rE728 | scaffold_216 - | scaffold_305 - | CC1 | GO:0009102 | 867 | 3  | 12   | 4.80E-05 | 0.00010309 | biotin biosynthetic process                             | no cis-eQTL-based regulator identified |                                                                                                                                                                                                                                                                             |
| XY | XY256 | 256 | 1 | 20 | 4.8828 | 4.8828 | rE496 - rE728 | scaffold_216 - | scaffold_305 - | CC1 | GO:0006812 | 867 | 7  | 112  | 6.44E-06 | 0.00010309 | cation transport                                        | no cis-eQTL-based regulator identified |                                                                                                                                                                                                                                                                             |
| XY | XY256 | 256 | 1 | 20 | 4.8828 | 4.8828 | rE496 - rE728 | scaffold_216 - | scaffold_305 - | CC1 | GO:0009507 | 867 | 70 | 4504 | 2.46E-12 | 0.00010309 | chloroplast                                             | no cis-eQTL-based regulator identified |                                                                                                                                                                                                                                                                             |
| XY | XY256 | 256 | 1 | 20 | 4.8828 | 4.8828 | rE496 - rE728 | scaffold_216 - | scaffold_305 - | CC1 | GO:0009570 | 867 | 16 | 784  | 3.64E-05 | 0.00010309 | chloroplast stroma                                      | no cis-eQTL-based regulator identified |                                                                                                                                                                                                                                                                             |
| XY | XY256 | 256 | 1 | 20 | 4.8828 | 4.8828 | rE496 - rE728 | scaffold_216 - | scaffold_305 - | CC1 | GO:0050660 | 867 | 5  | 46   | 9.36E-06 | 0.00010309 | FAD binding                                             | no cis-eQTL-based regulator identified |                                                                                                                                                                                                                                                                             |
| XY | XY256 | 256 | 1 | 20 | 4.8828 | 4.8828 | rE496 - rE728 | scaffold_216 - | scaffold_305 - | CC1 | GO:0010154 | 867 | 5  | 43   | 6.68E-06 | 0.00010309 | fruit development                                       | no cis-eQTL-based regulator identified |                                                                                                                                                                                                                                                                             |
| XY | XY256 | 256 | 1 | 20 | 4.8828 | 4.8828 | rE496 - rE728 | scaffold_216 - | scaffold_305 - | CC1 | GO:0008152 | 867 | 26 | 1264 | 1.34E-07 | 0.00010309 | metabolic process                                       | no cis-eQTL-based regulator identified |                                                                                                                                                                                                                                                                             |
| XY | XY256 | 256 | 1 | 20 | 4.8828 | 4.8828 | rE496 - rE728 | scaffold_216 - | scaffold_305 - | CC1 | GO:0005739 | 867 | 27 | 1513 | 1.18E-06 | 0.00010309 | mitochondrion                                           | no cis-eQTL-based regulator identified |                                                                                                                                                                                                                                                                             |
| XY | XY256 | 256 | 1 | 20 | 4.8828 | 4.8828 | rE496 - rE728 | scaffold_216 - | scaffold_305 - | CC1 | GO:0009944 | 867 | 4  | 36   | 6.97E-05 | 1.03E-04   | polarity specification of adaxial/abaxial axis          | no cis-eQTL-based regulator identified |                                                                                                                                                                                                                                                                             |
| XY | XY256 | 256 | 1 | 20 | 4.8828 | 4.8828 | rE496 - rE728 | scaffold_216 - | scaffold_305 - | CC1 | GO:0010159 | 867 | 3  | 8    | 1.24E-05 | 1.03E-04   | specification of organ position                         | no cis-eQTL-based regulator identified |                                                                                                                                                                                                                                                                             |
| XY | XY256 | 256 | 1 | 20 | 4.8828 | 4.8828 | rE496 - rE728 | scaffold_216 - | scaffold_305 - | CC1 | GO:0003700 | 867 | 37 | 2456 | 8.17E-07 | 1.03E-04   | transcription factor activity                           | no cis-eQTL-based regulator identified |                                                                                                                                                                                                                                                                             |
| XY | XY256 | 256 | 1 | 20 | 4.8828 | 4.8828 | rE496 - rE728 | scaffold_216 - | scaffold_305 - | CC1 | GO:0000160 | 867 | 4  | 37   | 7.78E-05 | 1.03E-04   | two-component signal transduction system (phosphorelay) | no cis-eQTL-based regulator identified | CSA1 (CONSTITUTIVE SHADE-AVOIDANCE1); ATP binding / protein binding / transmembrane receptor >< disease resistance protein (NBS-LRR class) >< disease resistance protein (NBS-LRR class) >< RPS2 (RESISTANT TO P. SYRINGAE 2)                                               |
| XY | XY256 | 256 | 1 | 20 | 4.8828 | 4.8828 | rE496 - rE728 | scaffold_216 - | scaffold_305 - | CC2 | GO:0005524 | 79  | 15 | 1938 | 2.41E-13 | 5.26E-04   | ATP binding                                             | no cis-eQTL-based regulator identified | CSA1 (CONSTITUTIVE SHADE-AVOIDANCE1); ATP binding / protein binding / transmembrane receptor >< disease resistance protein (NBS-LRR class) >< disease resistance protein (NBS-LRR class) >< RPS2 (RESISTANT TO P. SYRINGAE 2)                                               |
| XY | XY256 | 256 | 1 | 20 | 4.8828 | 4.8828 | rE496 - rE728 | scaffold_216 - | scaffold_305 - | CC2 | GO:0006952 | 79  | 19 | 1100 | 3.86E-23 | 5.26E-04   | defense response                                        | no cis-eQTL-based regulator identified | CSA1 (CONSTITUTIVE SHADE-AVOIDANCE1); ATP binding / protein binding / transmembrane receptor >< disease resistance protein (NBS-LRR class) >< disease resistance protein (NBS-LRR class) >< RPS2 (RESISTANT TO P. SYRINGAE 2)                                               |
| XY | XY256 | 256 | 1 | 20 | 4.8828 | 4.8828 | rE496 - rE728 | scaffold_216 - | scaffold_305 - | CC2 | GO:0016045 | 79  | 2  | 11   | 1.68E-05 | 5.26E-04   | detection of bacterium                                  | no cis-eQTL-based regulator identified | CSA1 (CONSTITUTIVE SHADE-AVOIDANCE1); ATP binding / protein binding / transmembrane receptor >< disease resistance protein (NBS-LRR class) >< disease resistance protein (NBS-LRR class) >< RPS2 (RESISTANT TO P. SYRINGAE 2)                                               |
| XY | XY256 | 256 | 1 | 20 | 4.8828 | 4.8828 | rE496 - rE728 | scaffold_216 - | scaffold_305 - | CC2 | GO:0006118 | 79  | 4  | 376  | 6.22E-05 | 5.26E-04   | electron transport                                      | no cis-eQTL-based regulator identified | CSA1 (CONSTITUTIVE SHADE-AVOIDANCE1); ATP binding / protein binding / transmembrane receptor >< disease resistance protein (NBS-LRR class) >< disease resistance protein (NBS-LRR class) >< RPS2 (RESISTANT TO P. SYRINGAE 2)                                               |
| XY | XY256 | 256 | 1 | 20 | 4.8828 | 4.8828 | rE496 - rE728 | scaffold_216 - | scaffold_305 - | CC2 | GO:0006499 | 79  | 5  | 573  | 1.86E-05 | 5.26E-04   | N-terminal protein myristoylation                       | no cis-eQTL-based regulator identified | CSA1 (CONSTITUTIVE SHADE-AVOIDANCE1); ATP binding / protein binding / transmembrane receptor >< disease resistance protein (NBS-LRR class) >< disease resistance protein (NBS-LRR class) >< RPS2 (RESISTANT TO P. SYRINGAE 2)                                               |



|    |        |      |   |    |        |         |                |                |                |     |            |     |    |      |           |            |                                                          |                                                                                                                                                                                                                               |
|----|--------|------|---|----|--------|---------|----------------|----------------|----------------|-----|------------|-----|----|------|-----------|------------|----------------------------------------------------------|-------------------------------------------------------------------------------------------------------------------------------------------------------------------------------------------------------------------------------|
| XY | XY258  | 258  | 1 | 20 | 4.9228 | 4.9228  | rE496 - rE728  | scaffold_216 - | scaffold_305 - | CC1 | GO:0005739 | 792 | 27 | 1513 | 2.10E-07  | 1.06E-04   | mitochondrion transcription factor activity              | no cis-eQTL-based regulator identified                                                                                                                                                                                        |
| XY | XY258  | 258  | 1 | 20 | 4.9228 | 4.9228  | rE496 - rE728  | scaffold_216 - | scaffold_305 - | CC1 | GO:0003700 | 792 | 34 | 2456 | 1.96E-06  | 1.06E-04   | two-component signal transduction system (phosphorelay)  | no cis-eQTL-based regulator identified                                                                                                                                                                                        |
| XY | XY258  | 258  | 1 | 20 | 4.9228 | 4.9228  | rE496 - rE728  | scaffold_216 - | scaffold_305 - | CC1 | GO:0000160 | 792 | 4  | 37   | 5.49E-05  | 1.06E-04   | chloroplast envelope                                     | no cis-eQTL-based regulator identified                                                                                                                                                                                        |
| XY | XY258  | 258  | 1 | 20 | 4.9228 | 4.9228  | rE496 - rE728  | scaffold_216 - | scaffold_305 - | CC2 | GO:0009941 | 28  | 4  | 812  | 1.95E-05  | 6.58E-04   | mitochondrion protein homodimerization activity          | no cis-eQTL-based regulator identified                                                                                                                                                                                        |
| XY | XY258  | 258  | 1 | 20 | 4.9228 | 4.9228  | rE496 - rE728  | scaffold_216 - | scaffold_305 - | CC2 | GO:0005739 | 28  | 4  | 1513 | 0.0002147 | 6.58E-04   | stromule                                                 | no cis-eQTL-based regulator identified                                                                                                                                                                                        |
| XY | XY258  | 258  | 1 | 20 | 4.9228 | 4.9228  | rE496 - rE728  | scaffold_216 - | scaffold_305 - | CC2 | GO:0042803 | 28  | 2  | 86   | 1.36E-04  | 0.00065789 |                                                          |                                                                                                                                                                                                                               |
| XY | XY258  | 258  | 1 | 20 | 4.9228 | 4.9228  | rE496 - rE728  | scaffold_216 - | scaffold_305 - | CC2 | GO:0010319 | 28  | 2  | 93   | 1.59E-04  | 0.00065789 |                                                          |                                                                                                                                                                                                                               |
| XY | XY258  | 258  | 1 | 20 | 4.9228 | 4.9228  | rE496 - rE728  | scaffold_216 - | scaffold_305 - | CC3 | GO:0005524 | 35  | 15 | 1938 | 2.55E-19  | 0.00277778 | ATP binding                                              | CSA1 (CONSTITUTIVE SHADE-AVOIDANCE1); ATP binding / protein binding / transmembrane receptor >< disease resistance protein (NBS-LRR class) >< disease resistance protein (NBS-LRR class) >< RPS2 (RESISTANT TO P. SYRINGAE 2) |
| XY | XY258  | 258  | 1 | 20 | 4.9228 | 4.9228  | rE496 - rE728  | scaffold_216 - | scaffold_305 - | CC3 | GO:0006952 | 35  | 18 | 1100 | 3.55E-29  | 0.00277778 | defense response                                         | CSA1 (CONSTITUTIVE SHADE-AVOIDANCE1); ATP binding / protein binding / transmembrane receptor >< disease resistance protein (NBS-LRR class) >< disease resistance protein (NBS-LRR class) >< RPS2 (RESISTANT TO P. SYRINGAE 2) |
| XY | XY258  | 258  | 1 | 20 | 4.9228 | 4.9228  | rE496 - rE728  | scaffold_216 - | scaffold_305 - | CC3 | GO:0016045 | 35  | 2  | 11   | 3.24E-06  | 0.00277778 | detection of bacterium                                   | CSA1 (CONSTITUTIVE SHADE-AVOIDANCE1); ATP binding / protein binding / transmembrane receptor >< disease resistance protein (NBS-LRR class) >< disease resistance protein (NBS-LRR class) >< RPS2 (RESISTANT TO P. SYRINGAE 2) |
| XY | XY258  | 258  | 1 | 20 | 4.9228 | 4.9228  | rE496 - rE728  | scaffold_216 - | scaffold_305 - | CC3 | GO:0006499 | 35  | 5  | 573  | 3.09E-07  | 0.00277778 | N-terminal protein myristoylation                        | CSA1 (CONSTITUTIVE SHADE-AVOIDANCE1); ATP binding / protein binding / transmembrane receptor >< disease resistance protein (NBS-LRR class) >< disease resistance protein (NBS-LRR class) >< RPS2 (RESISTANT TO P. SYRINGAE 2) |
| XY | XY258  | 258  | 1 | 20 | 4.9228 | 4.9228  | rE496 - rE728  | scaffold_216 - | scaffold_305 - | CC3 | GO:0017111 | 35  | 8  | 121  | 5.09E-18  | 0.00277778 | nucleoside-triphosphatase activity                       | CSA1 (CONSTITUTIVE SHADE-AVOIDANCE1); ATP binding / protein binding / transmembrane receptor >< disease resistance protein (NBS-LRR class) >< disease resistance protein (NBS-LRR class) >< RPS2 (RESISTANT TO P. SYRINGAE 2) |
| XY | XY258  | 258  | 1 | 20 | 4.9228 | 4.9228  | rE496 - rE728  | scaffold_216 - | scaffold_305 - | CC3 | GO:0000166 | 35  | 9  | 463  | 2.53E-15  | 0.00277778 | nucleotide binding                                       | CSA1 (CONSTITUTIVE SHADE-AVOIDANCE1); ATP binding / protein binding / transmembrane receptor >< disease resistance protein (NBS-LRR class) >< disease resistance protein (NBS-LRR class) >< RPS2 (RESISTANT TO P. SYRINGAE 2) |
| XY | XY258  | 258  | 1 | 20 | 4.9228 | 4.9228  | rE496 - rE728  | scaffold_216 - | scaffold_305 - | CC3 | GO:0009626 | 35  | 3  | 132  | 5.03E-06  | 0.00277778 | plant-type hypersensitive response                       | CSA1 (CONSTITUTIVE SHADE-AVOIDANCE1); ATP binding / protein binding / transmembrane receptor >< disease resistance protein (NBS-LRR class) >< disease resistance protein (NBS-LRR class) >< RPS2 (RESISTANT TO P. SYRINGAE 2) |
| XY | XY258  | 258  | 1 | 20 | 4.9228 | 4.9228  | rE496 - rE728  | scaffold_216 - | scaffold_305 - | CC3 | GO:0005515 | 35  | 15 | 2885 | 8.93E-17  | 0.00277778 | protein binding                                          | CSA1 (CONSTITUTIVE SHADE-AVOIDANCE1); ATP binding / protein binding / transmembrane receptor >< disease resistance protein (NBS-LRR class) >< disease resistance protein (NBS-LRR class) >< RPS2 (RESISTANT TO P. SYRINGAE 2) |
| XY | XY623  | 623  | 5 | 3  | 0.485  | 11.9231 | rG1255 - E529  | LG_5 -         | LG_5 - 13.9    | CC1 | None       | 51  | .  | .    | .         | .          | n/a                                                      | no cis-eQTL-based regulator identified                                                                                                                                                                                        |
| XY | XY707  | 707  | 5 | 10 | 2.0942 | 13.5323 | rG1255 - E529  | scaffold_133 - | scaffold_70 -  | CC1 | GO:0009635 | 69  | 2  | 2    | 2.33E-07  | 0.00059524 | herbicide response                                       | gw1.70.736.1                                                                                                                                                                                                                  |
| XY | XY707  | 707  | 5 | 10 | 2.0942 | 13.5323 | rG1255 - E529  | scaffold_133 - | scaffold_70 -  | CC2 | GO:0005524 | 12  | 10 | 1938 | 1.42E-17  | 0.00384615 | ATP binding                                              | eugene3.00700253 >< gw1.70.715.1                                                                                                                                                                                              |
| XY | XY707  | 707  | 5 | 10 | 2.0942 | 13.5323 | rG1255 - E529  | scaffold_133 - | scaffold_70 -  | CC2 | GO:0006952 | 12  | 10 | 1100 | 4.88E-20  | 0.00384615 | defense response                                         | eugene3.00700253 >< gw1.70.715.1                                                                                                                                                                                              |
| XY | XY707  | 707  | 5 | 10 | 2.0942 | 13.5323 | rG1255 - E529  | scaffold_133 - | scaffold_70 -  | CC2 | GO:0031224 | 12  | 10 | 341  | 3.69E-25  | 0.00384615 | intrinsic to membrane nucleoside-triphosphatase activity | eugene3.00700253 >< gw1.70.715.1                                                                                                                                                                                              |
| XY | XY707  | 707  | 5 | 10 | 2.0942 | 13.5323 | rG1255 - E529  | scaffold_133 - | scaffold_70 -  | CC2 | GO:0017111 | 12  | 2  | 121  | 4.73E-05  | 0.00384615 | nucleotide binding                                       | eugene3.00700253 >< gw1.70.715.1                                                                                                                                                                                              |
| XY | XY707  | 707  | 5 | 10 | 2.0942 | 13.5323 | rG1255 - E529  | scaffold_133 - | scaffold_70 -  | CC2 | GO:0000166 | 12  | 2  | 463  | 6.86E-04  | 0.00384615 | protein binding transmembrane receptor activity          | eugene3.00700253 >< gw1.70.715.1                                                                                                                                                                                              |
| XY | XY707  | 707  | 5 | 10 | 2.0942 | 13.5323 | rG1255 - E529  | scaffold_133 - | scaffold_70 -  | CC2 | GO:0004888 | 12  | 10 | 361  | 6.56E-25  | 0.00384615 | herbicide response                                       | gw1.70.736.1                                                                                                                                                                                                                  |
| XY | XY708  | 708  | 5 | 10 | 2.1142 | 13.5523 | rG1255 - E529  | scaffold_133 - | scaffold_70 -  | CC1 | GO:0009635 | 92  | 2  | 2    | 4.16E-07  | 0.00046296 | ATP binding                                              | eugene3.00700253 >< gw1.70.715.1                                                                                                                                                                                              |
| XY | XY708  | 708  | 5 | 10 | 2.1142 | 13.5523 | rG1255 - E529  | scaffold_133 - | scaffold_70 -  | CC3 | GO:0005524 | 12  | 10 | 1938 | 1.42E-17  | 0.00384615 | defense response                                         | eugene3.00700253 >< gw1.70.715.1                                                                                                                                                                                              |
| XY | XY708  | 708  | 5 | 10 | 2.1142 | 13.5523 | rG1255 - E529  | scaffold_133 - | scaffold_70 -  | CC3 | GO:0006952 | 12  | 10 | 1100 | 4.88E-20  | 0.00384615 | intrinsic to membrane nucleoside-triphosphatase activity | eugene3.00700253 >< gw1.70.715.1                                                                                                                                                                                              |
| XY | XY708  | 708  | 5 | 10 | 2.1142 | 13.5523 | rG1255 - E529  | scaffold_133 - | scaffold_70 -  | CC3 | GO:0031224 | 12  | 10 | 341  | 3.69E-25  | 0.00384615 | nucleotide binding                                       | eugene3.00700253 >< gw1.70.715.1                                                                                                                                                                                              |
| XY | XY708  | 708  | 5 | 10 | 2.1142 | 13.5523 | rG1255 - E529  | scaffold_133 - | scaffold_70 -  | CC3 | GO:0017111 | 12  | 2  | 121  | 4.73E-05  | 0.00384615 | protein binding transmembrane receptor activity          | eugene3.00700253 >< gw1.70.715.1                                                                                                                                                                                              |
| XY | XY708  | 708  | 5 | 10 | 2.1142 | 13.5523 | rG1255 - E529  | scaffold_133 - | scaffold_70 -  | CC3 | GO:0000166 | 12  | 2  | 463  | 6.86E-04  | 0.00384615 | herbicide response                                       | gw1.70.736.1                                                                                                                                                                                                                  |
| XY | XY708  | 708  | 5 | 10 | 2.1142 | 13.5523 | rG1255 - E529  | scaffold_133 - | scaffold_70 -  | CC3 | GO:0005515 | 12  | 11 | 2885 | 2.83E-18  | 0.00384615 | ATP binding                                              | eugene3.00700253 >< gw1.70.715.1                                                                                                                                                                                              |
| XY | XY708  | 708  | 5 | 10 | 2.1142 | 13.5523 | rG1255 - E529  | scaffold_133 - | scaffold_70 -  | CC3 | GO:0004888 | 12  | 10 | 361  | 6.56E-25  | 0.00384615 | defense response                                         | eugene3.00700253 >< gw1.70.715.1                                                                                                                                                                                              |
| XY | XY709  | 709  | 6 | 1  | 0.0001 | 13.5524 | rE918 - rS613  | LG_6 - 0.51    | LG_6 - 1.31    | CC1 | GO:0009507 | 39  | 8  | 4504 | 2.61E-05  | 0.00043103 | chloroplast                                              | no cis-eQTL-based regulator identified                                                                                                                                                                                        |
| XY | XY709  | 709  | 6 | 1  | 0.0001 | 13.5524 | rE918 - rS613  | LG_6 - 0.51    | LG_6 - 1.31    | CC1 | GO:0009570 | 39  | 4  | 784  | 6.52E-05  | 0.00043103 | chloroplast stroma defense response to bacterium         | no cis-eQTL-based regulator identified                                                                                                                                                                                        |
| XY | XY709  | 709  | 6 | 1  | 0.0001 | 13.5524 | rE918 - rS613  | LG_6 - 0.51    | LG_6 - 1.31    | CC1 | GO:0009816 | 39  | 2  | 65   | 1.51E-04  | 0.00043103 | ubiquitin-protein ligase activity                        | no cis-eQTL-based regulator identified                                                                                                                                                                                        |
| XY | XY709  | 709  | 6 | 1  | 0.0001 | 13.5524 | rE918 - rS613  | LG_6 - 0.51    | LG_6 - 1.31    | CC1 | GO:0004842 | 39  | 3  | 366  | 1.45E-04  | 0.00043103 | ATP-dependent helicase activity                          | no cis-eQTL-based regulator identified                                                                                                                                                                                        |
| XY | XY710  | 710  | 6 | 1  | 0.0201 | 13.5724 | rE918 - rS613  | LG_6 - 0.51    | LG_6 - 1.31    | CC1 | GO:0008026 | 33  | 2  | 135  | 4.65E-04  | 0.0004902  | chloroplast                                              | no cis-eQTL-based regulator identified                                                                                                                                                                                        |
| XY | XY710  | 710  | 6 | 1  | 0.0201 | 13.5724 | rE918 - rS613  | LG_6 - 0.51    | LG_6 - 1.31    | CC1 | GO:0009507 | 33  | 7  | 4504 | 6.66E-05  | 0.0004902  | chromatin                                                | no cis-eQTL-based regulator identified                                                                                                                                                                                        |
| XY | XY1015 | 1015 | 9 | 1  | 0.0001 | 19.3218 | rG3457 - G2541 | LG_9 - 0.45    | LG_9 - 2.35    | CC1 | GO:0005717 | 80  | 3  | 28   | 5.59E-07  | 0.00076923 | DNA recombination RNA-dependent DNA replication          | no cis-eQTL-based regulator identified                                                                                                                                                                                        |
| XY | XY1015 | 1015 | 9 | 1  | 0.0001 | 19.3218 | rG3457 - G2541 | LG_9 - 0.45    | LG_9 - 2.35    | CC1 | GO:0006310 | 80  | 3  | 298  | 6.68E-04  | 0.00076923 |                                                          |                                                                                                                                                                                                                               |
| XY | XY1015 | 1015 | 9 | 1  | 0.0001 | 19.3218 | rG3457 - G2541 | LG_9 - 0.45    | LG_9 - 2.35    | CC1 | GO:0006278 | 80  | 3  | 279  | 5.52E-04  | 0.00076923 |                                                          |                                                                                                                                                                                                                               |

|    |        |      |   |   |        |         |                |             |             |     |            |     |    |      |            |            |                                                                     |                                                                                                                                                                                                                                                                                                                                                                                                                                                                                                                                                                                                                                                                                                                                                                                                                                                                                                                                                                                                                                                                                              |                                                                                                                                                                                                                                                                                                                                                                                                                                |
|----|--------|------|---|---|--------|---------|----------------|-------------|-------------|-----|------------|-----|----|------|------------|------------|---------------------------------------------------------------------|----------------------------------------------------------------------------------------------------------------------------------------------------------------------------------------------------------------------------------------------------------------------------------------------------------------------------------------------------------------------------------------------------------------------------------------------------------------------------------------------------------------------------------------------------------------------------------------------------------------------------------------------------------------------------------------------------------------------------------------------------------------------------------------------------------------------------------------------------------------------------------------------------------------------------------------------------------------------------------------------------------------------------------------------------------------------------------------------|--------------------------------------------------------------------------------------------------------------------------------------------------------------------------------------------------------------------------------------------------------------------------------------------------------------------------------------------------------------------------------------------------------------------------------|
| XY | XY1015 | 1015 | 9 | 1 | 0.0001 | 19.3218 | rG3457 - G2541 | LG_9 - 0.45 | LG_9 - 2.35 | CC1 | GO:0003964 | 80  | 3  | 281  | 5.63E-04   | 0.00076923 | RNA-directed DNA polymerase activity                                | no cis-eQTL-based regulator identified                                                                                                                                                                                                                                                                                                                                                                                                                                                                                                                                                                                                                                                                                                                                                                                                                                                                                                                                                                                                                                                       |                                                                                                                                                                                                                                                                                                                                                                                                                                |
| XY | XY1016 | 1016 | 9 | 1 | 0.0201 | 19.3418 | rG3457 - G2541 | LG_9 - 0.45 | LG_9 - 2.35 | CC1 | GO:0005717 | 98  | 3  | 28   | 1.03E-06   | 0.00071429 | chromatin                                                           | no cis-eQTL-based regulator identified                                                                                                                                                                                                                                                                                                                                                                                                                                                                                                                                                                                                                                                                                                                                                                                                                                                                                                                                                                                                                                                       |                                                                                                                                                                                                                                                                                                                                                                                                                                |
| XY | XY1017 | 1017 | 9 | 1 | 0.0401 | 19.3618 | rG3457 - G2541 | LG_9 - 0.45 | LG_9 - 2.35 | CC1 | GO:0005717 | 116 | 3  | 28   | 1.72E-06   | 0.00067568 | chromatin                                                           | no cis-eQTL-based regulator identified                                                                                                                                                                                                                                                                                                                                                                                                                                                                                                                                                                                                                                                                                                                                                                                                                                                                                                                                                                                                                                                       |                                                                                                                                                                                                                                                                                                                                                                                                                                |
| XY | XY1018 | 1018 | 9 | 1 | 0.0601 | 19.3818 | rG3457 - G2541 | LG_9 - 0.45 | LG_9 - 2.35 | CC1 | GO:0005717 | 125 | 3  | 28   | 2.15E-06   | 0.00069444 | chromatin protein dimerization                                      | no cis-eQTL-based regulator identified                                                                                                                                                                                                                                                                                                                                                                                                                                                                                                                                                                                                                                                                                                                                                                                                                                                                                                                                                                                                                                                       |                                                                                                                                                                                                                                                                                                                                                                                                                                |
| XY | XY1018 | 1018 | 9 | 1 | 0.0601 | 19.3818 | rG3457 - G2541 | LG_9 - 0.45 | LG_9 - 2.35 | CC1 | GO:0046983 | 125 | 3  | 173  | 5.07E-04   | 0.00069444 | activity sesquiterpene biosynthetic process                         | no cis-eQTL-based regulator identified                                                                                                                                                                                                                                                                                                                                                                                                                                                                                                                                                                                                                                                                                                                                                                                                                                                                                                                                                                                                                                                       |                                                                                                                                                                                                                                                                                                                                                                                                                                |
| XY | XY1018 | 1018 | 9 | 1 | 0.0601 | 19.3818 | rG3457 - G2541 | LG_9 - 0.45 | LG_9 - 2.35 | CC1 | GO:0051762 | 125 | 2  | 20   | 0.00014467 | 0.00069444 | sesquiterpenoid biosynthetic process                                | no cis-eQTL-based regulator identified                                                                                                                                                                                                                                                                                                                                                                                                                                                                                                                                                                                                                                                                                                                                                                                                                                                                                                                                                                                                                                                       |                                                                                                                                                                                                                                                                                                                                                                                                                                |
| XY | XY1018 | 1018 | 9 | 1 | 0.0601 | 19.3818 | rG3457 - G2541 | LG_9 - 0.45 | LG_9 - 2.35 | CC1 | GO:0016106 | 125 | 2  | 20   | 1.45E-04   | 0.00069444 | sesquiterpenoid biosynthetic process                                | no cis-eQTL-based regulator identified                                                                                                                                                                                                                                                                                                                                                                                                                                                                                                                                                                                                                                                                                                                                                                                                                                                                                                                                                                                                                                                       |                                                                                                                                                                                                                                                                                                                                                                                                                                |
| XY | XY1019 | 1019 | 9 | 1 | 0.0801 | 19.4018 | rG3457 - G2541 | LG_9 - 0.45 | LG_9 - 2.35 | CC1 | GO:0005717 | 126 | 2  | 28   | 2.91E-04   | 0.000625   | chromatin protein dimerization                                      | no cis-eQTL-based regulator identified                                                                                                                                                                                                                                                                                                                                                                                                                                                                                                                                                                                                                                                                                                                                                                                                                                                                                                                                                                                                                                                       |                                                                                                                                                                                                                                                                                                                                                                                                                                |
| XY | XY1019 | 1019 | 9 | 1 | 0.0801 | 19.4018 | rG3457 - G2541 | LG_9 - 0.45 | LG_9 - 2.35 | CC1 | GO:0046983 | 126 | 4  | 173  | 1.90E-05   | 0.000625   | activity sesquiterpene biosynthetic process                         | no cis-eQTL-based regulator identified                                                                                                                                                                                                                                                                                                                                                                                                                                                                                                                                                                                                                                                                                                                                                                                                                                                                                                                                                                                                                                                       |                                                                                                                                                                                                                                                                                                                                                                                                                                |
| XY | XY1019 | 1019 | 9 | 1 | 0.0801 | 19.4018 | rG3457 - G2541 | LG_9 - 0.45 | LG_9 - 2.35 | CC1 | GO:0051762 | 126 | 2  | 20   | 1.47E-04   | 0.000625   | sesquiterpenoid biosynthetic process                                | no cis-eQTL-based regulator identified                                                                                                                                                                                                                                                                                                                                                                                                                                                                                                                                                                                                                                                                                                                                                                                                                                                                                                                                                                                                                                                       |                                                                                                                                                                                                                                                                                                                                                                                                                                |
| XY | XY1019 | 1019 | 9 | 1 | 0.0801 | 19.4018 | rG3457 - G2541 | LG_9 - 0.45 | LG_9 - 2.35 | CC1 | GO:0016106 | 126 | 2  | 20   | 1.47E-04   | 0.000625   | protein dimerization                                                | no cis-eQTL-based regulator identified                                                                                                                                                                                                                                                                                                                                                                                                                                                                                                                                                                                                                                                                                                                                                                                                                                                                                                                                                                                                                                                       |                                                                                                                                                                                                                                                                                                                                                                                                                                |
| XY | XY1020 | 1020 | 9 | 1 | 0.1001 | 19.4218 | rG3457 - G2541 | LG_9 - 0.45 | LG_9 - 2.35 | CC1 | GO:0046983 | 119 | 4  | 173  | 1.52E-05   | 0.000625   | activity sesquiterpene biosynthetic process                         | no cis-eQTL-based regulator identified                                                                                                                                                                                                                                                                                                                                                                                                                                                                                                                                                                                                                                                                                                                                                                                                                                                                                                                                                                                                                                                       |                                                                                                                                                                                                                                                                                                                                                                                                                                |
| XY | XY1020 | 1020 | 9 | 1 | 0.1001 | 19.4218 | rG3457 - G2541 | LG_9 - 0.45 | LG_9 - 2.35 | CC1 | GO:0051762 | 119 | 2  | 20   | 1.31E-04   | 0.000625   | sesquiterpenoid biosynthetic process                                | no cis-eQTL-based regulator identified                                                                                                                                                                                                                                                                                                                                                                                                                                                                                                                                                                                                                                                                                                                                                                                                                                                                                                                                                                                                                                                       |                                                                                                                                                                                                                                                                                                                                                                                                                                |
| XY | XY1020 | 1020 | 9 | 1 | 0.1001 | 19.4218 | rG3457 - G2541 | LG_9 - 0.45 | LG_9 - 2.35 | CC1 | GO:0016106 | 119 | 2  | 20   | 1.31E-04   | 0.000625   | biosynthetic process                                                | no cis-eQTL-based regulator identified                                                                                                                                                                                                                                                                                                                                                                                                                                                                                                                                                                                                                                                                                                                                                                                                                                                                                                                                                                                                                                                       |                                                                                                                                                                                                                                                                                                                                                                                                                                |
| XY | XY1020 | 1020 | 9 | 1 | 0.1001 | 19.4218 | rG3457 - G2541 | LG_9 - 0.45 | LG_9 - 2.35 | CC2 | None       | 14  | .  | .    | .          | .          | n/a                                                                 | no cis-eQTL-based regulator identified                                                                                                                                                                                                                                                                                                                                                                                                                                                                                                                                                                                                                                                                                                                                                                                                                                                                                                                                                                                                                                                       |                                                                                                                                                                                                                                                                                                                                                                                                                                |
| XY | XY1020 | 1020 | 9 | 1 | 0.1001 | 19.4218 | rG3457 - G2541 | LG_9 - 0.45 | LG_9 - 2.35 | CC3 | None       | 11  | .  | .    | .          | .          | n/a                                                                 | gw1.IX.502.1                                                                                                                                                                                                                                                                                                                                                                                                                                                                                                                                                                                                                                                                                                                                                                                                                                                                                                                                                                                                                                                                                 | ATCBR                                                                                                                                                                                                                                                                                                                                                                                                                          |
| XY | XY1021 | 1021 | 9 | 1 | 0.1201 | 19.4418 | rG3457 - G2541 | LG_9 - 0.45 | LG_9 - 2.35 | CC1 | GO:0007165 | 18  | 2  | 411  | 1.24E-03   | 0.002      | signal transduction protein dimerization                            | gw1.IX.502.1 >< grail3.0001050101                                                                                                                                                                                                                                                                                                                                                                                                                                                                                                                                                                                                                                                                                                                                                                                                                                                                                                                                                                                                                                                            | ATCBR >< DC1 domain-containing protein                                                                                                                                                                                                                                                                                                                                                                                         |
| XY | XY1021 | 1021 | 9 | 1 | 0.1201 | 19.4418 | rG3457 - G2541 | LG_9 - 0.45 | LG_9 - 2.35 | CC2 | GO:0046983 | 107 | 3  | 173  | 3.22E-04   | 0.00060976 | activity sesquiterpene biosynthetic process                         | no cis-eQTL-based regulator identified                                                                                                                                                                                                                                                                                                                                                                                                                                                                                                                                                                                                                                                                                                                                                                                                                                                                                                                                                                                                                                                       |                                                                                                                                                                                                                                                                                                                                                                                                                                |
| XY | XY1021 | 1021 | 9 | 1 | 0.1201 | 19.4418 | rG3457 - G2541 | LG_9 - 0.45 | LG_9 - 2.35 | CC2 | GO:0051762 | 107 | 2  | 20   | 1.06E-04   | 0.00060976 | sesquiterpenoid biosynthetic process                                | no cis-eQTL-based regulator identified                                                                                                                                                                                                                                                                                                                                                                                                                                                                                                                                                                                                                                                                                                                                                                                                                                                                                                                                                                                                                                                       |                                                                                                                                                                                                                                                                                                                                                                                                                                |
| XY | XY1021 | 1021 | 9 | 1 | 0.1201 | 19.4418 | rG3457 - G2541 | LG_9 - 0.45 | LG_9 - 2.35 | CC2 | GO:0016106 | 107 | 2  | 20   | 0.00010602 | 0.00060976 | biosynthetic process                                                | no cis-eQTL-based regulator identified                                                                                                                                                                                                                                                                                                                                                                                                                                                                                                                                                                                                                                                                                                                                                                                                                                                                                                                                                                                                                                                       |                                                                                                                                                                                                                                                                                                                                                                                                                                |
| XY | XY1021 | 1021 | 9 | 1 | 0.1201 | 19.4418 | rG3457 - G2541 | LG_9 - 0.45 | LG_9 - 2.35 | CC3 | None       | 18  | .  | .    | .          | .          | n/a                                                                 | no cis-eQTL-based regulator identified                                                                                                                                                                                                                                                                                                                                                                                                                                                                                                                                                                                                                                                                                                                                                                                                                                                                                                                                                                                                                                                       | ATCBR >< DC1 domain-containing protein >< similar to unknown protein [Arabidopsis thaliana] (TAIR:AT4G39790.1); similar to unnamed protein product [Vitis vinifera] (GB:CAO67364.1); contains InterPro domain Protein of unknown function DUF632 (InterPro:IPR006867); contains InterPro domain Protein of unknown function DUF630 (InterPro:IPR006868)                                                                        |
| XY | XY1023 | 1023 | 9 | 1 | 0.1601 | 19.4818 | rG3457 - G2541 | LG_9 - 0.45 | LG_9 - 2.35 | CC1 | GO:0004128 | 62  | 2  | 5    | 1.88E-06   | 0.00079365 | cytochrome-b5 reductase activity sesquiterpene biosynthetic process | gw1.IX.502.1 >< grail3.0001050101 >< eugene3.00090113                                                                                                                                                                                                                                                                                                                                                                                                                                                                                                                                                                                                                                                                                                                                                                                                                                                                                                                                                                                                                                        |                                                                                                                                                                                                                                                                                                                                                                                                                                |
| XY | XY1023 | 1023 | 9 | 1 | 0.1601 | 19.4818 | rG3457 - G2541 | LG_9 - 0.45 | LG_9 - 2.35 | CC2 | GO:0051762 | 75  | 2  | 20   | 5.20E-05   | 0.00067568 | sesquiterpenoid biosynthetic process                                | no cis-eQTL-based regulator identified                                                                                                                                                                                                                                                                                                                                                                                                                                                                                                                                                                                                                                                                                                                                                                                                                                                                                                                                                                                                                                                       |                                                                                                                                                                                                                                                                                                                                                                                                                                |
| XY | XY1023 | 1023 | 9 | 1 | 0.1601 | 19.4818 | rG3457 - G2541 | LG_9 - 0.45 | LG_9 - 2.35 | CC2 | GO:0016106 | 75  | 2  | 20   | 5.20E-05   | 0.00067568 | biosynthetic process                                                | no cis-eQTL-based regulator identified                                                                                                                                                                                                                                                                                                                                                                                                                                                                                                                                                                                                                                                                                                                                                                                                                                                                                                                                                                                                                                                       | ATCBR >< ATCXE12 (ARABIDOPSIS THALIANA CARBOXYESTERASE 12); carboxylesterase >< DC1 domain-containing protein >< similar to unknown protein [Arabidopsis thaliana] (TAIR:AT4G39790.1); similar to unnamed protein product [Vitis vinifera] (GB:CAO67364.1); contains InterPro domain Protein of unknown function DUF632 (InterPro:IPR006867); contains InterPro domain Protein of unknown function DUF630 (InterPro:IPR006868) |
| XY | XY1028 | 1028 | 9 | 2 | 0.2409 | 19.5626 | G2541 - rG588  | LG_9 - 2.35 | LG_9 - 3.82 | CC1 | None       | 113 | .  | .    | .          | .          | n/a                                                                 | gw1.IX.502.1 >< fgenes4_pm.C_LG_IX000303 >< grail3.0001050101 >< eugene3.00090113                                                                                                                                                                                                                                                                                                                                                                                                                                                                                                                                                                                                                                                                                                                                                                                                                                                                                                                                                                                                            |                                                                                                                                                                                                                                                                                                                                                                                                                                |
| XY | XY1029 | 1029 | 9 | 2 | 0.2609 | 19.5826 | G2541 - rG588  | LG_9 - 2.35 | LG_9 - 3.82 | CC1 | None       | 115 | .  | .    | .          | .          | n/a                                                                 | gw1.IX.502.1 >< fgenes4_pm.C_LG_IX000303 >< grail3.0001050101 >< eugene3.00090113                                                                                                                                                                                                                                                                                                                                                                                                                                                                                                                                                                                                                                                                                                                                                                                                                                                                                                                                                                                                            |                                                                                                                                                                                                                                                                                                                                                                                                                                |
| XY | XY1030 | 1030 | 9 | 2 | 0.2809 | 19.6026 | G2541 - rG588  | LG_9 - 2.35 | LG_9 - 3.82 | CC1 | None       | 99  | .  | .    | .          | .          | n/a                                                                 | gw1.IX.502.1 >< fgenes4_pm.C_LG_IX000303 >< grail3.0001050101 >< eugene3.00090113<br>grail3.0001108901 >< gw1.IX.2730.1 >< gw1.IX.4200.1 >< fgenes4_pm.C_LG_IX000514 >< estExt_fgenes4_pg.C_LG_IX1143 >< estExt_Genewise1_v1.C_LG_IX3689 >< estExt_fgenes4_pg.C_LG_IX1183 >< eugene3.00090969 >< estExt_fgenes4_pm.C_LG_IX0400 >< gw1.IX.3749.1 >< estExt_Genewise1_v1.C_LG_IX3773 >< estExt_Genewise1_v1.C_LG_IX3342 >< estExt_fgenes4_pg.C_LG_IX0907 >< estExt_fgenes4_pm.C_LG_IX0496 >< estExt_fgenes4_pg.C_LG_IX1049 >< gw1.IX.3070.1 >< estExt_fgenes4_pm.C_LG_IX0591 >< eugene3.00091029 >< eugene3.00091201 >< eugene3.00091234<br>grail3.0001108901 >< gw1.IX.2730.1 >< gw1.IX.4200.1 >< fgenes4_pm.C_LG_IX000514 >< estExt_fgenes4_pg.C_LG_IX1143 >< estExt_Genewise1_v1.C_LG_IX3689 >< estExt_fgenes4_pg.C_LG_IX1183 >< eugene3.00090969 >< estExt_fgenes4_pm.C_LG_IX0400 >< gw1.IX.3749.1 ><                                                                                                                                                                                      |                                                                                                                                                                                                                                                                                                                                                                                                                                |
| XY | XY1063 | 1063 | 9 | 5 | 0.9116 | 20.2333 | O21 - P2321    | LG_9 - 7.76 | -           | CC1 | GO:0009507 | 84  | 18 | 4504 | 1.32E-10   | 0.00031447 | chloroplast                                                         | No Hits >< AGD2 (ABERRANT GROWTH AND DEATH 2); transaminase >< ATRBL1 (ARABIDOPSIS THALIANA RHOMBOID-LIKE 1) >< ATXDH1 (XANTHINE DEHYDROGENASE 1); xanthine dehydrogenase >< C2 domain-containing protein >< CHR5 (chromatin remodeling 5); ATP binding / DNA binding / chromatin binding / helicase >< COPT1 (COPPER TRANSPORTER 1); copper ion transmembrane transporter >< F-box family protein >< mthSC70-2 >< PRLI-interacting factor >< protein binding / zinc ion binding >< PUX1 (PLANT UBX DOMAIN-CONTAINING PROTEIN 1) >< rhodanese-like domain-containing protein / PPIC-type PPIASE domain-containing protein >< ribosomal protein L1 family protein >< RNA binding >< RPS15AE (ribosomal protein S15A E); structural constituent of ribosome >< SDIR1 (SALT- AND DROUGHT-INDUCED RING FINGER1); protein binding / ubiquitin-protein ligase/ zinc ion binding >< similar to unknown [Populus trichocarpa] (GB:ABK93876.1) >< UDP-glucuronosyl/UDP-glucosyl transferase family protein >< zinc finger (CCCH-type) family protein / RNA recognition motif (RRM)-containing protein |                                                                                                                                                                                                                                                                                                                                                                                                                                |
| XY | XY1063 | 1063 | 9 | 5 | 0.9116 | 20.2333 | O21 - P2321    | LG_9 - 7.76 | -           | CC1 | GO:0009570 | 84  | 8  | 784  | 2.52E-08   | 0.00031447 | chloroplast stroma                                                  | No Hits >< AGD2 (ABERRANT GROWTH AND DEATH 2); transaminase >< ATRBL1 (ARABIDOPSIS THALIANA RHOMBOID-LIKE 1) >< ATXDH1 (XANTHINE DEHYDROGENASE 1); xanthine dehydrogenase >< C2 domain-containing protein >< CHR5 (chromatin remodeling 5); ATP binding / DNA binding / chromatin binding / helicase >< COPT1 (COPPER TRANSPORTER 1); copper ion transmembrane transporter >< F-box family protein >< mthSC70-2 >< PRLI-interacting factor >< protein binding / zinc ion binding >< PUX1 (PLANT UBX DOMAIN-CONTAINING PROTEIN 1) >< rhodanese-like domain-containing protein / PPIC-type PPIASE domain-containing protein >< ribosomal protein L1                                                                                                                                                                                                                                                                                                                                                                                                                                            |                                                                                                                                                                                                                                                                                                                                                                                                                                |

family protein >> RNA binding >> RPS15AE (ribosomal protein S15A E); structural constituent of ribosome >> SDR1 (SALT- AND DROUGHT-INDUCED RING FINGER1); protein binding / ubiquitin-protein ligase/ zinc ion binding >> similar to unknown [Populus trichocarpa] (GB:ABK93876.1) >> UDP-glucuronosyl/UDP-glucosyl transferase family protein >> zinc finger (CCCH-type) family protein / RNA recognition motif (RRM)-containing protein

No Hits >> AGD2 (ABERRANT GROWTH AND DEATH 2); transaminase >> ATRBL1 (ARABIDOPSIS THALIANA RHOMBOID-LIKE 1) >> ATXDH1 (XANTHINE DEHYDROGENASE 1); xanthine dehydrogenase >> C2 domain-containing protein >> CHR5 (chromatin remodeling 5); ATP binding / DNA binding / chromatin binding / helicase >> COPT1 (COPPER TRANSPORTER 1); copper ion transmembrane transporter >> F-box family protein >> mTHSC70-2 >> PRLI-interacting factor >> protein binding / zinc ion binding >> PUX1 (PLANT UBX DOMAIN-CONTAINING PROTEIN 1) >> rhodanese-like domain-containing protein / PPIC-type PPIase domain-containing protein >> ribosomal protein L family protein >> RNA binding >> RPS15AE (ribosomal protein S15A E); structural constituent of ribosome >> SDR1 (SALT- AND DROUGHT-INDUCED RING FINGER1); protein binding / ubiquitin-protein ligase/ zinc ion binding >> similar to unknown [Populus trichocarpa] (GB:ABK93876.1) >> UDP-glucuronosyl/UDP-glucosyl transferase family protein >> zinc finger (CCCH-type) family protein / RNA recognition motif (RRM)-containing protein

No Hits >> AGD2 (ABERRANT GROWTH AND DEATH 2); transaminase >> ATRBL1 (ARABIDOPSIS THALIANA RHOMBOID-LIKE 1) >> ATXDH1 (XANTHINE DEHYDROGENASE 1); xanthine dehydrogenase >> C2 domain-containing protein >> CHR5 (chromatin remodeling 5); ATP binding / DNA binding / chromatin binding / helicase >> COPT1 (COPPER TRANSPORTER 1); copper ion transmembrane transporter >> F-box family protein >> mTHSC70-2 >> PRLI-interacting factor >> protein binding / zinc ion binding >> PUX1 (PLANT UBX DOMAIN-CONTAINING PROTEIN 1) >> rhodanese-like domain-containing protein / PPIC-type PPIase domain-containing protein >> ribosomal protein L family protein >> RNA binding >> RPS15AE (ribosomal protein S15A E); structural constituent of ribosome >> SDR1 (SALT- AND DROUGHT-INDUCED RING FINGER1); protein binding / ubiquitin-protein ligase/ zinc ion binding >> similar to unknown [Populus trichocarpa] (GB:ABK93876.1) >> UDP-glucuronosyl/UDP-glucosyl transferase family protein >> zinc finger (CCCH-type) family protein / RNA recognition motif (RRM)-containing protein

No Hits >> AGD2 (ABERRANT GROWTH AND DEATH 2); transaminase >> ATRBL1 (ARABIDOPSIS THALIANA RHOMBOID-LIKE 1) >> ATXDH1 (XANTHINE DEHYDROGENASE 1); xanthine dehydrogenase >> C2 domain-containing protein >> CHR5 (chromatin remodeling 5); ATP binding / DNA binding / chromatin binding / helicase >> COPT1 (COPPER TRANSPORTER 1); copper ion transmembrane transporter >> F-box family protein >> mTHSC70-2 >> PRLI-interacting factor >> protein binding / zinc ion binding >> PUX1 (PLANT UBX DOMAIN-CONTAINING PROTEIN 1) >> rhodanese-like domain-containing protein / PPIC-type PPIase domain-containing protein >> ribosomal protein L family protein >> RNA binding >> RPS15AE (ribosomal protein S15A E); structural constituent of ribosome >> SDR1 (SALT- AND DROUGHT-INDUCED RING FINGER1); protein binding / ubiquitin-protein ligase/ zinc ion binding >> similar to unknown [Populus trichocarpa] (GB:ABK93876.1) >> UDP-glucuronosyl/UDP-glucosyl transferase family protein >> zinc finger (CCCH-type) family protein / RNA recognition motif (RRM)-containing protein

No Hits >> AGD2 (ABERRANT GROWTH AND DEATH 2); transaminase >> ATRBL1 (ARABIDOPSIS THALIANA RHOMBOID-LIKE 1) >> ATXDH1 (XANTHINE DEHYDROGENASE 1); xanthine dehydrogenase >> C2 domain-containing protein >> CHR5 (chromatin remodeling 5); ATP binding / DNA binding / chromatin binding / helicase >> COPT1 (COPPER TRANSPORTER 1); copper ion transmembrane transporter >> F-box family protein >> mTHSC70-2 >> PRLI-interacting factor >> protein binding / zinc ion binding >> PUX1 (PLANT UBX DOMAIN-CONTAINING PROTEIN 1) >> rhodanese-like domain-containing protein / PPIC-type PPIase domain-containing protein >> ribosomal protein L family protein >> RNA binding >> RPS15AE (ribosomal protein S15A E); structural constituent of ribosome >> SDR1 (SALT- AND DROUGHT-INDUCED RING FINGER1); protein binding / ubiquitin-protein ligase/ zinc ion binding >> similar to unknown [Populus trichocarpa] (GB:ABK93876.1) >> UDP-glucuronosyl/UDP-glucosyl transferase family protein >> zinc finger (CCCH-type) family protein / RNA recognition motif (RRM)-containing protein

No Hits >> AGD2 (ABERRANT GROWTH AND DEATH 2); transaminase >> ATRBL1 (ARABIDOPSIS THALIANA RHOMBOID-LIKE 1) >> ATXDH1 (XANTHINE DEHYDROGENASE 1); xanthine dehydrogenase >> C2 domain-containing protein >> CHR5 (chromatin remodeling 5); ATP binding / DNA binding / chromatin binding / helicase >> COPT1 (COPPER TRANSPORTER 1); copper ion transmembrane transporter >> F-box family protein >> mTHSC70-2 >> PRLI-interacting factor >> protein binding / zinc ion binding >> PUX1 (PLANT UBX DOMAIN-CONTAINING PROTEIN 1) >> rhodanese-like domain-containing protein / PPIC-type PPIase domain-containing protein >> ribosomal protein L family protein >> RNA binding >> RPS15AE (ribosomal protein S15A E); structural constituent of ribosome >> SDR1 (SALT- AND DROUGHT-INDUCED RING FINGER1); protein binding / ubiquitin-protein ligase/ zinc ion binding >> similar to unknown [Populus trichocarpa] (GB:ABK93876.1) >> UDP-glucuronosyl/UDP-glucosyl transferase family protein >> zinc finger (CCCH-type) family protein / RNA recognition motif (RRM)-containing protein









[illegible]

|    |        |      |   |   |        |         |             |             |   |     |            |     |    |      |          |            |                                      |                                                                                                                                                                                                                                                                                                                                                                                                                                                                                                                                                                                                                                                                                                                                                                                                                                                                                                                                                                                                                                                                                                                                                                                                                                                                                                                                                                                                                                                                                                                                                                                                                            |
|----|--------|------|---|---|--------|---------|-------------|-------------|---|-----|------------|-----|----|------|----------|------------|--------------------------------------|----------------------------------------------------------------------------------------------------------------------------------------------------------------------------------------------------------------------------------------------------------------------------------------------------------------------------------------------------------------------------------------------------------------------------------------------------------------------------------------------------------------------------------------------------------------------------------------------------------------------------------------------------------------------------------------------------------------------------------------------------------------------------------------------------------------------------------------------------------------------------------------------------------------------------------------------------------------------------------------------------------------------------------------------------------------------------------------------------------------------------------------------------------------------------------------------------------------------------------------------------------------------------------------------------------------------------------------------------------------------------------------------------------------------------------------------------------------------------------------------------------------------------------------------------------------------------------------------------------------------------|
|    |        |      |   |   |        |         |             |             |   |     |            |     |    |      |          |            |                                      | estExt_Genewise1_v1.C_LG_IX3773<br>><<br>estExt_Genewise1_v1.C_LG_IX3342<br>>< estExt_fgenesha4_pg.C_LG_IX0907<br>>< estExt_fgenesha4_pm.C_LG_IX0496<br>>< estExt_fgenesha4_pg.C_LG_IX1049<br>>< gw1.IX.3070.1 ><<br>estExt_fgenesha4_pm.C.LG_LG_IX0591 ><<br>eugene3.00091029eugene3.00091234<br>grail3.0001108901 >< gw1.IX.2730.1<br>>< eugene3.00091344 ><<br>gw1.IX.4200.1 ><<br>fgenesha4_pm.C_LG_IX000514 ><<br>estExt_fgenesha4_pg.C_LG_IX1143 ><<br>fgenesha4_pg.C_LG_IX001309 ><<br>estExt_Genewise1_v1.C_LG_IX3689<br>>< estExt_fgenesha4_pg.C_LG_IX1183<br>>< eugene3.00090969 ><<br>estExt_fgenesha4_pm.C.LG_LG_IX0400 ><<br>gw1.IX.3749.1 ><<br>estExt_Genewise1_v1.C_LG_IX3773<br>><<br>estExt_Genewise1_v1.C_LG_IX3342<br>>< estExt_fgenesha4_pg.C_LG_IX0907<br>>< estExt_fgenesha4_pm.C_LG_IX0496<br>>< estExt_fgenesha4_pg.C_LG_IX1049<br>>< gw1.IX.3070.1 ><<br>estExt_fgenesha4_pm.C.LG_LG_IX0591 ><<br>eugene3.00091029eugene3.00091234<br>grail3.0001108901 >< gw1.IX.2730.1<br>>< eugene3.00091344 ><<br>gw1.IX.4200.1 ><<br>fgenesha4_pm.C_LG_IX000514 ><<br>estExt_fgenesha4_pg.C_LG_IX1143 ><<br>fgenesha4_pg.C_LG_IX001309 ><<br>estExt_Genewise1_v1.C.LG_IX3689<br>>< estExt_fgenesha4_pg.C.LG_IX1183<br>>< eugene3.00090969 ><<br>estExt_fgenesha4_pm.C.LG_LG_IX0400 ><<br>gw1.IX.3749.1 ><<br>estExt_Genewise1_v1.C_LG_IX3773<br>><<br>estExt_Genewise1_v1.C_LG_IX3342<br>>< estExt_fgenesha4_pg.C_LG_IX0907<br>>< estExt_fgenesha4_pm.C_LG_IX0496<br>>< estExt_fgenesha4_pg.C_LG_IX1049<br>>< gw1.IX.3070.1 ><<br>estExt_fgenesha4_pm.C.LG_LG_IX0591 ><<br>eugene3.00091029eugene3.00091234 |
| XY | XY1064 | 1064 | 9 | 5 | 0.9316 | 20.2533 | O21 - P2321 | LG_9 - 7.76 | - | CC1 | GO:0003723 | 110 | 12 | 478  | 4.84E-15 | 0.00026316 | RNA binding                          |                                                                                                                                                                                                                                                                                                                                                                                                                                                                                                                                                                                                                                                                                                                                                                                                                                                                                                                                                                                                                                                                                                                                                                                                                                                                                                                                                                                                                                                                                                                                                                                                                            |
| XY | XY1064 | 1064 | 9 | 5 | 0.9316 | 20.2533 | O21 - P2321 | LG_9 - 7.76 | - | CC1 | GO:0003735 | 110 | 13 | 540  | 5.74E-16 | 0.00026316 | structural constituent of ribosome   | estExt_fgenesha4_pm.C.LG_LG_IX0591 ><<br>eugene3.00091029eugene3.00091234<br>grail3.0001108901 >< gw1.IX.2730.1<br>>< eugene3.00091344 ><<br>gw1.IX.4200.1 ><<br>fgenesha4_pm.C_LG_IX000514 ><<br>estExt_fgenesha4_pg.C_LG_IX1143 ><<br>fgenesha4_pg.C_LG_IX001309 ><<br>estExt_Genewise1_v1.C.LG_IX3689<br>>< estExt_fgenesha4_pg.C.LG_IX1183<br>>< eugene3.00090969 ><<br>estExt_fgenesha4_pm.C.LG_LG_IX0400 ><<br>gw1.IX.3749.1 ><<br>estExt_Genewise1_v1.C_LG_IX3773<br>><<br>estExt_Genewise1_v1.C_LG_IX3342<br>>< estExt_fgenesha4_pg.C_LG_IX0907<br>>< estExt_fgenesha4_pm.C.LG_LG_IX0496<br>>< estExt_fgenesha4_pg.C_LG_IX1049<br>>< gw1.IX.3070.1 ><<br>estExt_fgenesha4_pm.C.LG_LG_IX0591 ><<br>eugene3.00091029eugene3.00091234<br>grail3.0001108901 >< gw1.IX.2730.1<br>>< eugene3.00091344 ><<br>gw1.IX.4200.1 ><<br>fgenesha4_pm.C_LG_IX000514 ><<br>estExt_fgenesha4_pg.C_LG_IX1143 ><<br>fgenesha4_pg.C_LG_IX001309 ><<br>estExt_Genewise1_v1.C.LG_IX3689<br>>< estExt_fgenesha4_pg.C.LG_IX1183<br>>< eugene3.00090969 ><<br>estExt_fgenesha4_pm.C.LG_LG_IX0400 ><<br>gw1.IX.3749.1 ><<br>estExt_Genewise1_v1.C_LG_IX3773<br>><<br>estExt_Genewise1_v1.C_LG_IX3342<br>>< estExt_fgenesha4_pg.C_LG_IX0907<br>>< estExt_fgenesha4_pm.C.LG_LG_IX0496<br>>< estExt_fgenesha4_pg.C_LG_IX1049<br>>< gw1.IX.3070.1 ><<br>estExt_fgenesha4_pm.C.LG_LG_IX0591 ><<br>eugene3.00091029eugene3.00091234                                                                                                                                                                                                                |
| XY | XY1064 | 1064 | 9 | 5 | 0.9316 | 20.2533 | O21 - P2321 | LG_9 - 7.76 | - | CC1 | GO:0006412 | 110 | 14 | 564  | 2.70E-17 | 0.00026316 | translation                          |                                                                                                                                                                                                                                                                                                                                                                                                                                                                                                                                                                                                                                                                                                                                                                                                                                                                                                                                                                                                                                                                                                                                                                                                                                                                                                                                                                                                                                                                                                                                                                                                                            |
| XY | XY1064 | 1064 | 9 | 5 | 0.9316 | 20.2533 | O21 - P2321 | LG_9 - 7.76 | - | CC2 | GO:0006310 | 111 | 3  | 298  | 1.72E-03 | 0.00625    | DNA recombination                    | no cis-eQTL-based regulator identified                                                                                                                                                                                                                                                                                                                                                                                                                                                                                                                                                                                                                                                                                                                                                                                                                                                                                                                                                                                                                                                                                                                                                                                                                                                                                                                                                                                                                                                                                                                                                                                     |
| XY | XY1064 | 1064 | 9 | 5 | 0.9316 | 20.2533 | O21 - P2321 | LG_9 - 7.76 | - | CC2 | GO:0006278 | 111 | 3  | 279  | 1.42E-03 | 0.00625    | RNA-dependent DNA replication        | no cis-eQTL-based regulator identified                                                                                                                                                                                                                                                                                                                                                                                                                                                                                                                                                                                                                                                                                                                                                                                                                                                                                                                                                                                                                                                                                                                                                                                                                                                                                                                                                                                                                                                                                                                                                                                     |
| XY | XY1064 | 1064 | 9 | 5 | 0.9316 | 20.2533 | O21 - P2321 | LG_9 - 7.76 | - | CC2 | GO:0003964 | 111 | 3  | 281  | 1.45E-03 | 0.00625    | RNA-directed DNA polymerase activity | no cis-eQTL-based regulator identified<br>grail3.0001108901 >< gw1.IX.2730.1<br>>< eugene3.00091344 ><<br>gw1.IX.4200.1 ><<br>fgenesha4_pm.C_LG_IX000514 ><<br>estExt_fgenesha4_pg.C_LG_IX1143 ><<br>fgenesha4_pg.C_LG_IX001309 ><<br>estExt_Genewise1_v1.C.LG_IX3689<br>>< estExt_fgenesha4_pg.C.LG_IX1183<br>>< eugene3.00090969 ><<br>estExt_fgenesha4_pm.C.LG_LG_IX0400 ><<br>gw1.IX.3749.1 ><<br>estExt_Genewise1_v1.C_LG_IX3773<br>><<br>estExt_Genewise1_v1.C_LG_IX3342<br>>< estExt_fgenesha4_pg.C_LG_IX0907<br>>< estExt_fgenesha4_pm.C.LG_LG_IX0496<br>>< estExt_fgenesha4_pg.C_LG_IX1049<br>>< gw1.IX.3070.1 ><<br>estExt_fgenesha4_pm.C.LG_LG_IX0591 ><<br>eugene3.00091029eugene3.00091234<br>grail3.0001108901 >< gw1.IX.2730.1<br>>< eugene3.00091344 ><<br>gw1.IX.4200.1 ><                                                                                                                                                                                                                                                                                                                                                                                                                                                                                                                                                                                                                                                                                                                                                                                                                                |
| XY | XY1065 | 1065 | 9 | 5 | 0.9516 | 20.2733 | O21 - P2321 | LG_9 - 7.76 | - | CC1 | GO:0016161 | 121 | 2  | 14   | 6.51E-05 | 0.00025126 | beta-amylase activity                |                                                                                                                                                                                                                                                                                                                                                                                                                                                                                                                                                                                                                                                                                                                                                                                                                                                                                                                                                                                                                                                                                                                                                                                                                                                                                                                                                                                                                                                                                                                                                                                                                            |
| XY | XY1065 | 1065 | 9 | 5 | 0.9516 | 20.2733 | O21 - P2321 | LG_9 - 7.76 | - | CC1 | GO:0009507 | 121 | 24 | 4504 | 7.07E-13 | 0.00025126 | chloroplast                          |                                                                                                                                                                                                                                                                                                                                                                                                                                                                                                                                                                                                                                                                                                                                                                                                                                                                                                                                                                                                                                                                                                                                                                                                                                                                                                                                                                                                                                                                                                                                                                                                                            |

of ribosome >> SDIR1 (SALT- AND DROUGHT-INDUCED RING FINGER1); protein binding / ubiquitin-protein ligase/ zinc ion binding >> similar to unknown [Populus trichocarpa] (GB:ABK93876.1) zinc finger (CCCH-type) family protein / RNA recognition motif (RRM)-containing protein

No Hits >> AGO2 (ABERRANT GROWTH AND DEATH 2); transaminase >> anklyrin repeat family protein >> ATRBL1 (ARABIDOPSIS THALIANA RHOMBOLD-LIKE 1) >> ATXDH1 (XANTHINE DEHYDROGENASE 1); xanthine dehydrogenase >> C2 domain-containing protein >> calcium-transporting ATPase >> CHR5 (chromatin remodeling 5); ATP binding / DNA binding / chromatin binding / helicase >> COPT1 (COPPER TRANSPORTER 1); copper ion transmembrane transporter >> F-box family protein >> mTHSC70-2 >> PRLI-interacting factor >> protein binding / zinc ion binding >> PUX1 (PLANT UBX DOMAIN-CONTAINING PROTEIN 1) >> rhodanese-like domain-containing protein / PP1C-type PPIASE domain-containing protein >> ribosomal protein L1 family protein >> RNA binding >> RPS15AE (ribosomal protein S15A E); structural constituent of ribosome >> SDIR1 (SALT- AND DROUGHT-INDUCED RING FINGER1); protein binding / ubiquitin-protein ligase/ zinc ion binding >> similar to unknown [Populus trichocarpa] (GB:ABK93876.1) zinc finger (CCCH-type) family protein / RNA recognition motif (RRM)-containing protein

No Hits > AGO2 (ABERRANT GROWTH AND DEATH 2); transaminase > ankyrin repeat family protein > ATRBL1 (ARABIDOPSIS THALIANA RHOMBOL- LIKE 1) > ATXDH1 (XANTHINE DEHYDROGENASE 1); xanthine dehydrogenase > C2 domain-containing protein > calcium-transporting ATPase > CHR5 (chromatin remodeling 5); ATP binding / DNA binding / chromatin binding / helicase > COPT1 (COPPER TRANSPORTER 1); copper ion transmembrane transporter > F-box family protein > mTHSC70-2 > PRLI-interacting factor > protein binding / zinc ion binding > PUX1 (PLANT UBX DOMAIN- CONTAINING PROTEIN 1) > rhodanese-like domain-containing protein / PPIC- type PPIASE domain-containing protein > ribosomal protein L1 family protein > RNA binding > RPS15AE (ribosomal protein 15SAE); structural constituent of ribosome > SDIR1 (SALT- AND DROUGHT-INDUCED RING FINGER1); protein binding / ubiquitin-protein ligase / zinc ion binding > similar to unknown [Populus trichocarpa] (GB:ABK93876.1) zinc finger (CCCH-type) family protein / RNA recognition motif (RRM)-containing protein

No Hits > AGO2 (ABERRANT GROWTH AND DEATH 2); transaminase > ankyrin repeat family protein > ATRBL1 (ARABIDOPSIS THALIANA RHOMBOLIKE 1) > ATXDH1 (XANTHINE DEHYDROGENASE 1); xanthine dehydrogenase > C2 domain-containing protein > calcium-transporting ATPase > CHR5 (chromatin remodeling 5); ATP binding / DNA binding / chromatin binding / helicase > COPT1 (COPPER TRANSPORTER 1); copper ion transmembrane transporter > F-box family protein > mTHSC70-2 > PRL1-interacting factor > protein binding / zinc ion binding > PUX1 (PLANT UBX DOMAIN-CONTAINING PROTEIN 1) > rhodanese-like domain-containing protein / PP1C-type PPIASE domain-containing protein > ribosomal protein L1 family protein > RNA binding > RPS15AE (ribosomal protein 15SA E); structural constituent of ribosome > SDIR1 (SALT- AND DROUGHT-INDUCED RING FINGER1); protein binding / ubiquitin-protein ligase / zinc ion binding > similar to unknown [Populus trichocarpa] (GB:ABK93876.1) zinc finger (CCCH-type) family protein / RNA recognition motif (RRM)-containing protein

No Hits >> AGO2 (ABERRANT GROWTH AND DEATH 2); transaminase >> anklyrin repeat family protein >> ATRBL1 (ARABIDOPSIS THALIANA RHOMBOLD-LIKE 1) >> ATXDH1 (XANTHINE DEHYDROGENASE 1); xanthine dehydrogenase >> C2 domain-containing protein >> calcium-transporting ATPase >> CHR5 (chromatin remodeling 5); ATP binding / DNA binding / chromatin binding / helicase >> COPT1 (COPPER TRANSPORTER 1); copper ion transmembrane transporter >> F-box family protein >> mTHSC70-2 >> PRL1-interacting factor >> protein binding / zinc ion binding >> PUX1 (PLANT UBX DOMAIN-CONTAINING PROTEIN 1) >> rhodanese-like domain-containing protein / PP1C-type PPIASE domain-containing protein >> ribosomal protein L1 family protein >> RNA binding >> RPS15AE (ribosomal protein 15SA E); structural constituent of ribosome >> SDIR1 (SALT- AND DROUGHT-INDUCED RING FINGER1); protein binding / ubiquitin-protein ligase / zinc ion binding >> similar to unknown [Populus trichocarpa] (GB:ABK93876.1) zinc finger (CCCH-type) family protein / RNA recognition motif (RRM)-containing protein

No Hits >> AGD2 (ABERRANT GROWTH AND DEATH 2); transaminase >> ankyrin repeat family protein >> ATRBL1 (ARABIDOPSIS THALIANA RHOMBOID-LIKE 1) >> ATXDH1 (XANTHINE DEHYDROGENASE 1); xanthine dehydrogenase





|    |        |      |   |   |        |         |             |             |   |     |            |     |    |      |            |            |                                      |
|----|--------|------|---|---|--------|---------|-------------|-------------|---|-----|------------|-----|----|------|------------|------------|--------------------------------------|
| XY | XY1065 | 1065 | 9 | 5 | 0.9516 | 20.2733 | O21 - P2321 | LG_9 - 7.76 | - | CC1 | GO:0005634 | 121 | 13 | 3084 | 2.61E-06   | 0.00025126 | nucleus                              |
| XY | XY1065 | 1065 | 9 | 5 | 0.9516 | 20.2733 | O21 - P2321 | LG_9 - 7.76 | - | CC1 | GO:0005515 | 121 | 10 | 2885 | 0.00019421 | 0.00025126 | protein binding                      |
| XY | XY1065 | 1065 | 9 | 5 | 0.9516 | 20.2733 | O21 - P2321 | LG_9 - 7.76 | - | CC1 | GO:0032312 | 121 | 2  | 14   | 6.51E-05   | 0.00025126 | regulation of ARF<br>GTPase activity |
| XY | XY1065 | 1065 | 9 | 5 | 0.9516 | 20.2733 | O21 - P2321 | LG_9 - 7.76 | - | CC1 | GO:0046686 | 121 | 6  | 677  | 0.00002781 | 0.00025126 | response to cadmium<br>ion           |
| XY | XY1065 | 1065 | 9 | 5 | 0.9516 | 20.2733 | O21 - P2321 | LG_9 - 7.76 | - | CC1 | GO:0005840 | 121 | 6  | 360  | 7.68E-07   | 0.00025126 | ribosome                             |

No Hits >> AGO2 (ABERRANT GROWTH AND DEATH 2); transaminase >> ankryin repeat family protein >> ATRBL1 (ARABIDOPSIS THALIANA RHOMBOLIKE 1) >> ATXDH1 (XANTHINE DEHYDROGENASE 1); xanthine dehydrogenase >> C2 domain-containing protein >> calcium-transporting ATPase >> CHR5 (chromatin remodeling 5); ATP binding / DNA binding / chromatin binding / helicase >> COPT1 (COPPER TRANSPORTER 1); copper ion transmembrane transporter >> F-box family protein >> mthSC70-2 >> PRLI-interacting factor >> protein binding / zinc ion binding >> PUX1 (PLANT UBQX DOMAIN-CONTAINING PROTEIN 1) >> rhodanese-like domain-containing protein / PP1C-type PPIASE domain-containing protein >> ribosomal protein L1 family protein >> ribosome >> RPS15AE (ribosomal protein S15A E); structural constituent of RNA binding >> SDIR1 (SALT AND DROUGHT-INDUCED RING FINGER1); protein binding / ubiquitin-protein ligase / zinc ion binding >> similar to unknown [Populus trichocarpa] (GB:ABK93876.1) zinc finger (CCCH-type) family protein / RNA recognition motif (RRM)-containing protein

No Hits < AGO2 (ABERRANT GROWTH AND DEATH 2); translinase >> ankryrin repeat family protein >> ATRB1 (ARABIDOPSIS THALIANA RHOMBOD-  
LIKE 1) <> ATXDH1 (XANTHINE DEHYDROGENASE 1); xanthine dehydrogenase  
<> C2 domain-containing protein >> calcium-transporting ATPase <> CHR5  
(chromatin remodeling 5); ATP binding / DNA binding / chromatin binding /  
helicase <> COP1T (COPPER TRANSPORTER 1); copper ion transmembrane  
transporter >> F-box family protein >> mHSC70-2 <> PRLI-interacting factor  
<> protein binding / zinc ion binding >> PUX1 (PLANT UBQ DOMAIN-  
CONTAINING PROTEIN 1) <> rhodanese-like domain-containing protein / PP1C-  
type PI3ASE domain-containing protein >> ribosomal protein L1 family protein  
<> RNA binding >> RPS15A (ribosomal protein S15A E); structural constituent  
of ribosome <> SDIR1 (SALT AND DROUGHT-INDUCED RING FINGER1); protein  
binding / ubiquitin-protein ligase / zinc ion binding <> similar to unknown  
[Populus trichocarpa] (GB:ABK93876.1) zinc finger (CCCH-type) family protein /  
RNA recognition motif (RRM)-containing protein

No Hits >> AGO2 (ABERRANT GROWTH AND DEATH 2); transaminase >> ankyrin repeat family protein >> ATRBL1 (ARABIDOPSIS THALIANA RHOMBOLIKE 1) >> ATXDPH1 (XANTHINE DEHYDROGENASE 1); xanthine dehydrogenase >> C2 domain-containing protein >> calcium-transporting ATPase >> CHRS (chromatin remodeling 5); ATP binding / DNA binding / chromatin binding / helicase >> COPT1 (COPPER TRANSPORTER 1); copper ion transmembrane transporter >> F-box family protein >> mthSC70-2 >> PRLI-interacting factor >> protein binding / zinc ion binding >> PUX1 (PLANT UBQX DOMAIN-CONTAINING PROTEIN 1) >> rhodanese-like domain-containing protein / PPIC-type PI3ASE domain-containing protein >> ribosomal protein L1 family protein >> RNA binding >> RPS15AE (ribosomal protein S15A E); structural constituent of ribosome >> SDIR1 (SALT AND DROUGHT-INDUCED RING FINGER1); protein binding / ubiquitin-protein ligase/ zinc ion binding >> similar to unknown [Populus trichocarpa] (GB:ABK93876.1) zinc finger (CCCH-type) family protein / RNA recognition motif (RRM)-containing protein

No Hits >> AGO2 (ABERRANT GROWTH AND DEATH 2); transaminase >> ankryin repeat family protein >> ATRBL1 (ARABIDOPSIS THALIANA RHOMBOLIKE 1) >> ATXDH1 (XANTHINE DEHYDROGENASE 1); xanthine dehydrogenase >> C2 domain-containing protein >> calcium-transporting ATPase >> CHR5 (chromatin remodeling 5); ATP binding / DNA binding / chromatin binding / helicase >> COPT1 (COPPER TRANSPORTER 1); copper ion transmembrane transporter >> F-box family protein >> mthCS7C-2 >> PRLI-interacting factor >> protein binding / zinc ion binding >> PUX1 (PLANT UBQX DOMAIN-CONTAINING PROTEIN 1) >> rhodanese-like domain-containing protein / PPIC-type PI3ASE domain-containing protein >> ribosomal protein L1 family protein / RNA binding >> RPS15AE (ribosomal protein S15A E); structural constituent of ribosome >> SDIR1 (SALT- AND DROUGHT-INDUCED RING FINGER1); protein binding / ubiquitin-protein ligase / zinc ion binding >> similar to unknown [Populus trichocarpa] (GB:ABK93876.1) zinc finger (CCCH-type) family protein / RNA recognition motif (RRM)-containing protein

No Hits >> AGO2 (ABERRANT GROWTH AND DEATH 2); transaminase >> ankyrin repeat family protein >> ATRBL1 (ARABIDOPSIS THALIANA RHOMBOLIKE 1) >> ATXHD1 (XANTHINE DEHYDROGENASE 1); xanthine dehydrogenase >> C2 domain-containing protein >> calcium-transporting ATPase >> CHR5 (chromatin remodeling 5); ATP binding / DNA binding / chromatin binding / helicase >> COP1T (COPPER TRANSPORTER 1); copper ion transmembrane transporter >> F-box family protein >> mHSC70-2 >> PRLI-interacting factor >> protein binding / zinc ion binding >> PUX1 (PLANT UBQX DOMAIN-CONTAINING PROTEIN 1) >> rhodanese-like domain-containing protein / PP1C-type PPIASE domain-containing protein >> ribosomal protein L1 family protein >> RNA binding >> RPS15A (ribosomal protein S15A E); structural constituent of ribosome >> SDIR1 (SALT- AND DROUGHT-INDUCED RING FINGER1); protein binding / ubiquitin-protein ligase / zinc ion binding >> similar to unknown [Populus trichocarpa] (GB:ABK93876.1) zinc finger (CCCH-type) family protein / RNA recognition motif (RRM)-containing protein



[illegible]

|    |        |      |   |   |        |         |             |             |   |     |            |     |    |      |            |           |                       |                                                                                                                                                                                                                                                                                                                                                                                                                                                                                                                                                                                                                                                                                                                                                                                                                                                                                                                                                                                                                                                                                                                                                                                                                                                                                                                                                                                                                                   |                                                                                                                                                                                                                                                                                                                                                                                                                                                                                                                                                                                                                                                                                                                                                                                                                                                                                                                                                                                                                                                                                                                                                                                                                                                                                                                                                                                                                                                                                                                                                                                                                                                                                                                                                                                                                                                                                                                                                                                                                                                                                                                                                                                                                                                                                                                                                                                                                                                                                                                                                                                                                                                                                                                                                                                                                                                                                                                                                                                                                                                                                                                                                                                                                                                                                                                                                                                                                                                                                                                                                                                                                                                                                                                                                                                                                                                                                                                                                                                                                                                                                                                                                                                                                                                                                                                                                                                                                                                                                                                                                                                                                                                                                                                                                                                                                                                                                                                                                                                                                                                                                                                                                                                                                                                                                                                                                                                                                                                                                                                                                                                                                                                                                                                                                                                                                                                                                                                                                                                                                                    |  |
|----|--------|------|---|---|--------|---------|-------------|-------------|---|-----|------------|-----|----|------|------------|-----------|-----------------------|-----------------------------------------------------------------------------------------------------------------------------------------------------------------------------------------------------------------------------------------------------------------------------------------------------------------------------------------------------------------------------------------------------------------------------------------------------------------------------------------------------------------------------------------------------------------------------------------------------------------------------------------------------------------------------------------------------------------------------------------------------------------------------------------------------------------------------------------------------------------------------------------------------------------------------------------------------------------------------------------------------------------------------------------------------------------------------------------------------------------------------------------------------------------------------------------------------------------------------------------------------------------------------------------------------------------------------------------------------------------------------------------------------------------------------------|------------------------------------------------------------------------------------------------------------------------------------------------------------------------------------------------------------------------------------------------------------------------------------------------------------------------------------------------------------------------------------------------------------------------------------------------------------------------------------------------------------------------------------------------------------------------------------------------------------------------------------------------------------------------------------------------------------------------------------------------------------------------------------------------------------------------------------------------------------------------------------------------------------------------------------------------------------------------------------------------------------------------------------------------------------------------------------------------------------------------------------------------------------------------------------------------------------------------------------------------------------------------------------------------------------------------------------------------------------------------------------------------------------------------------------------------------------------------------------------------------------------------------------------------------------------------------------------------------------------------------------------------------------------------------------------------------------------------------------------------------------------------------------------------------------------------------------------------------------------------------------------------------------------------------------------------------------------------------------------------------------------------------------------------------------------------------------------------------------------------------------------------------------------------------------------------------------------------------------------------------------------------------------------------------------------------------------------------------------------------------------------------------------------------------------------------------------------------------------------------------------------------------------------------------------------------------------------------------------------------------------------------------------------------------------------------------------------------------------------------------------------------------------------------------------------------------------------------------------------------------------------------------------------------------------------------------------------------------------------------------------------------------------------------------------------------------------------------------------------------------------------------------------------------------------------------------------------------------------------------------------------------------------------------------------------------------------------------------------------------------------------------------------------------------------------------------------------------------------------------------------------------------------------------------------------------------------------------------------------------------------------------------------------------------------------------------------------------------------------------------------------------------------------------------------------------------------------------------------------------------------------------------------------------------------------------------------------------------------------------------------------------------------------------------------------------------------------------------------------------------------------------------------------------------------------------------------------------------------------------------------------------------------------------------------------------------------------------------------------------------------------------------------------------------------------------------------------------------------------------------------------------------------------------------------------------------------------------------------------------------------------------------------------------------------------------------------------------------------------------------------------------------------------------------------------------------------------------------------------------------------------------------------------------------------------------------------------------------------------------------------------------------------------------------------------------------------------------------------------------------------------------------------------------------------------------------------------------------------------------------------------------------------------------------------------------------------------------------------------------------------------------------------------------------------------------------------------------------------------------------------------------------------------------------------------------------------------------------------------------------------------------------------------------------------------------------------------------------------------------------------------------------------------------------------------------------------------------------------------------------------------------------------------------------------------------------------------------------------------------------------------------------------|--|
|    |        |      |   |   |        |         |             |             |   |     |            |     |    |      |            |           |                       |                                                                                                                                                                                                                                                                                                                                                                                                                                                                                                                                                                                                                                                                                                                                                                                                                                                                                                                                                                                                                                                                                                                                                                                                                                                                                                                                                                                                                                   | <div> <div> <div>estExt_Genewise1_v1.C_LG_IX3342</div> <div>&gt;&lt; estExt_fgennesh4_pg.C_LG_IX0907</div> <div>&gt;&lt; estExt_fgennesh4_pm.C_LG_IX0496</div> <div>&gt;&lt; estExt_fgennesh4_pg.C_LG_IX1049</div> <div>&gt;&lt; gw1.IX.3070.1</div> <div>&gt;&lt; estExt_fgennesh4_pm.C_LG_IX0591</div> <div>&gt;&lt; eugene3.00091029eugene3.00091234</div> <div>grail3.0001108901</div> <div>&gt;&lt; gw1.IX.2730.1</div> <div>&gt;&lt; eugene3.00091344</div> <div>&gt;&lt; gw1.IX.4200.1</div> <div>&gt;&lt; fgennesh4_pm.C_LG_IX000514</div> <div>&gt;&lt; estExt_fgennesh4_pg.C_LG_IX1143</div> <div>&gt;&lt; fgennesh4_pg.C_LG_IX001309</div> <div>&gt;&lt; estExt_Genewise1_v1.C_LG_IX3689</div> <div>&gt;&lt; estExt_fgennesh4_pg.C_LG_IX1183</div> <div>&gt;&lt; eugene3.00090969</div> <div>&gt;&lt; gw1.IX.4312.1</div> <div>&gt;&lt; estExt_fgennesh4_pm.C_LG_IX0400</div> <div>&gt;&lt; gw1.IX.3749.1</div> <div>&gt;&lt; estExt_Genewise1_v1.C_LG_IX3342</div> <div>&gt;&lt; estExt_fgennesh4_pg.C_LG_IX0907</div> <div>&gt;&lt; estExt_fgennesh4_pm.C_LG_IX0496</div> <div>&gt;&lt; estExt_fgennesh4_pg.C_LG_IX1049</div> <div>&gt;&lt; gw1.IX.3070.1</div> <div>&gt;&lt; estExt_fgennesh4_pm.C_LG_IX0591</div> <div>&gt;&lt; eugene3.00091029eugene3.00091234</div> <div>grail3.0001108901</div> <div>&gt;&lt; gw1.IX.2730.1</div> <div>&gt;&lt; eugene3.00091344</div> <div>&gt;&lt; gw1.IX.4200.1</div> <div>&gt;&lt; fgennesh4_pm.C_LG_IX000514</div> <div>&gt;&lt; estExt_fgennesh4_pg.C_LG_IX1143</div> <div>&gt;&lt; fgennesh4_pg.C_LG_IX001309</div> <div>&gt;&lt; estExt_Genewise1_v1.C_LG_IX3689</div> <div>&gt;&lt; estExt_fgennesh4_pg.C_LG_IX1183</div> <div>&gt;&lt; eugene3.00090969</div> <div>&gt;&lt; gw1.IX.4312.1</div> <div>&gt;&lt; estExt_fgennesh4_pm.C_LG_IX0400</div> <div>&gt;&lt; gw1.IX.3749.1</div> <div>&gt;&lt; estExt_Genewise1_v1.C_LG_IX3342</div> <div>&gt;&lt; estExt_fgennesh4_pg.C_LG_IX0907</div> <div>&gt;&lt; estExt_fgennesh4_pm.C_LG_IX0496</div> <div>&gt;&lt; estExt_fgennesh4_pg.C_LG_IX1049</div> <div>&gt;&lt; gw1.IX.3070.1</div> <div>&gt;&lt; estExt_fgennesh4_pm.C_LG_IX0591</div> <div>&gt;&lt; eugene3.00091029eugene3.00091234</div> <div>grail3.0001108901</div> <div>&gt;&lt; gw1.IX.2730.1</div> <div>&gt;&lt; eugene3.00091344</div> <div>&gt;&lt; gw1.IX.4200.1</div> <div>&gt;&lt; fgennesh4_pm.C_LG_IX000514</div> <div>&gt;&lt; estExt_fgennesh4_pg.C_LG_IX1143</div> <div>&gt;&lt; fgennesh4_pg.C_LG_IX001309</div> <div>&gt;&lt; estExt_Genewise1_v1.C_LG_IX3689</div> <div>&gt;&lt; estExt_fgennesh4_pg.C_LG_IX1183</div> <div>&gt;&lt; eugene3.00090969</div> <div>&gt;&lt; gw1.IX.4312.1</div> <div>&gt;&lt; estExt_fgennesh4_pm.C_LG_IX0400</div> <div>&gt;&lt; gw1.IX.3749.1</div> <div>&gt;&lt; estExt_Genewise1_v1.C_LG_IX3342</div> <div>&gt;&lt; estExt_fgennesh4_pg.C_LG_IX0907</div> <div>&gt;&lt; estExt_fgennesh4_pm.C_LG_IX0496</div> <div>&gt;&lt; estExt_fgennesh4_pg.C_LG_IX1049</div> <div>&gt;&lt; gw1.IX.3070.1</div> <div>&gt;&lt; estExt_fgennesh4_pm.C_LG_IX0591</div> <div>&gt;&lt; eugene3.00091029eugene3.00091234</div> <div>grail3.0001108901</div> <div>&gt;&lt; gw1.IX.2730.1</div> <div>&gt;&lt; eugene3.00091344</div> <div>&gt;&lt; gw1.IX.4200.1</div> <div>&gt;&lt; fgennesh4_pm.C_LG_IX000514</div> <div>&gt;&lt; estExt_fgennesh4_pg.C_LG_IX1143</div> <div>&gt;&lt; fgennesh4_pg.C_LG_IX001309</div> <div>&gt;&lt; estExt_Genewise1_v1.C_LG_IX3689</div> <div>&gt;&lt; estExt_fgennesh4_pg.C_LG_IX1183</div> <div>&gt;&lt; eugene3.00090969</div> <div>&gt;&lt; gw1.IX.4312.1</div> <div>&gt;&lt; estExt_fgennesh4_pm.C_LG_IX0400</div> <div>&gt;&lt; gw1.IX.3749.1</div> <div>&gt;&lt; estExt_Genewise1_v1.C_LG_IX3342</div> <div>&gt;&lt; estExt_fgennesh4_pg.C_LG_IX0907</div> <div>&gt;&lt; estExt_fgennesh4_pm.C_LG_IX0496</div> <div>&gt;&lt; estExt_fgennesh4_pg.C_LG_IX1049</div> <div>&gt;&lt; gw1.IX.3070.1</div> <div>&gt;&lt; estExt_fgennesh4_pm.C_LG_IX0591</div> <div>&gt;&lt; eugene3.00091029eugene3.00091234</div> <div>grail3.0001108901</div> <div>&gt;&lt; gw1.IX.2730.1</div> <div>&gt;&lt; eugene3.00091344</div> <div>&gt;&lt; gw1.IX.4200.1</div> <div>&gt;&lt; fgennesh4_pm.C_LG_IX000514</div> <div>&gt;&lt; estExt_fgennesh4_pg.C_LG_IX1143</div> <div>&gt;&lt; fgennesh4_pg.C_LG_IX001309</div> <div>&gt;&lt; estExt_Genewise1_v1.C_LG_IX3689</div> <div>&gt;&lt; estExt_fgennesh4_pg.C_LG_IX1183</div> <div>&gt;&lt; eugene3.00090969</div> <div>&gt;&lt; gw1.IX.4312.1</div> <div>&gt;&lt; estExt_fgennesh4_pm.C_LG_IX0400</div> <div>&gt;&lt; gw1.IX.3749.1</div> <div>&gt;&lt; estExt_Genewise1_v1.C_LG_IX3342</div> <div>&gt;&lt; estExt_fgennesh4_pg.C_LG_IX0907</div> <div>&gt;&lt; estExt_fgennesh4_pm.C_LG_IX0496</div> <div>&gt;&lt; estExt_fgennesh4_pg.C_LG_IX1049</div> <div>&gt;&lt; gw1.IX.3070.1</div> <div>&gt;&lt; estExt_fgennesh4_pm.C_LG_IX0591</div> <div>&gt;&lt; eugene3.00091029eugene3.00091234</div> <div>grail3.0001108901</div> <div>&gt;&lt; gw1.IX.2730.1</div> <div>&gt;&lt; eugene3.00091344</div> <div>&gt;&lt; gw1.IX.4200.1</div> <div>&gt;&lt; fgennesh4_pm.C_LG_IX000514</div> <div>&gt;&lt; estExt_fgennesh4_pg.C_LG_IX1143</div> <div>&gt;&lt; fgennesh4_pg.C_LG_IX001309</div> <div>&gt;&lt; estExt_Genewise1_v1.C_LG_IX3689</div> <div>&gt;&lt; estExt_fgennesh4_pg.C_LG_IX1183</div> <div>&gt;&lt; eugene3.00090969</div> <div>&gt;&lt; gw1.IX.4312.1</div> <div>&gt;&lt; estExt_fgennesh4_pm.C_LG_IX0400</div> <div>&gt;&lt; gw1.IX.3749.1</div> <div>&gt;&lt; estExt_Genewise1_v1.C_LG_IX3342</div> <div>&gt;&lt; estExt_fgennesh4_pg.C_LG_IX0907</div> <div>&gt;&lt; estExt_fgennesh4_pm.C_LG_IX0496</div> <div>&gt;&lt; estExt_fgennesh4_pg.C_LG_IX1049</div> <div>&gt;&lt; gw1.IX.3070.1</div> <div>&gt;&lt; estExt_Genewise1_v1.C_LG_IX3342</div> <div>&gt;&lt; estExt_fgennesh4_pg.C_LG_IX0907</div> <div>&gt;&lt; estExt_fgennesh4_pm.C_LG_IX0496</div> <div>&gt;&lt; estExt_fgennesh4_pg.C_LG_IX0496</div> </div> </div> |  |
| XY | XY1066 | 1066 | 9 | 5 | 0.9716 | 20.2933 | O21 - P2321 | LG_9 - 7.76 | - | CC1 | GO:0006955 | 121 | 2  | 15   | 0.00007513 | 0.0002439 | immune response       | <div> <div>ubiquitin-protein ligase/ zinc ion binding</div> <div>&gt;&lt; similar to unknown [Populus trichocarpa] (GB:ABK93876.1) zinc finger (CCCH-type) family protein / RNA recognition motif (RRM)-containing protein</div> </div>                                                                                                                                                                                                                                                                                                                                                                                                                                                                                                                                                                                                                                                                                                                                                                                                                                                                                                                                                                                                                                                                                                                                                                                           |                                                                                                                                                                                                                                                                                                                                                                                                                                                                                                                                                                                                                                                                                                                                                                                                                                                                                                                                                                                                                                                                                                                                                                                                                                                                                                                                                                                                                                                                                                                                                                                                                                                                                                                                                                                                                                                                                                                                                                                                                                                                                                                                                                                                                                                                                                                                                                                                                                                                                                                                                                                                                                                                                                                                                                                                                                                                                                                                                                                                                                                                                                                                                                                                                                                                                                                                                                                                                                                                                                                                                                                                                                                                                                                                                                                                                                                                                                                                                                                                                                                                                                                                                                                                                                                                                                                                                                                                                                                                                                                                                                                                                                                                                                                                                                                                                                                                                                                                                                                                                                                                                                                                                                                                                                                                                                                                                                                                                                                                                                                                                                                                                                                                                                                                                                                                                                                                                                                                                                                                                                    |  |
| XY | XY1066 | 1066 | 9 | 5 | 0.9716 | 20.2933 | O21 - P2321 | LG_9 - 7.76 | - | CC1 | GO:0005739 | 121 | 11 | 1513 | 8.54E-08   | 0.0002439 | mitochondrion         | <div> <div>No Hits</div> <div>&gt;&lt; AGD2 (ABERRANT GROWTH AND DEATH 2); transaminase</div> <div>&gt;&lt; ankyrin repeat family protein</div> <div>&gt;&lt; ATRBL1 (ARABIDOPSIS THALIANA RHOMBOID-LIKE 1)</div> <div>&gt;&lt; ATXDH1 (XANTHINE DEHYDROGENASE 1); xanthine dehydrogenase</div> <div>&gt;&lt; C2 domain-containing protein</div> <div>&gt;&lt; calcium-transporting ATPase</div> <div>&gt;&lt; CHR5 (chromatin remodeling 5); ATP binding / DNA binding / chromatin binding / helicase</div> <div>&gt;&lt; COPT1 (COPPER TRANSPORTER 1); copper ion transmembrane transporter</div> <div>&gt;&lt; F-box family protein</div> <div>&gt;&lt; histone H2B</div> <div>&gt;&lt; mthSC70-2</div> <div>&gt;&lt; PRLI-interacting factor</div> <div>&gt;&lt; PUX1 (PLANT UBX DOMAIN-CONTAINING PROTEIN 1)</div> <div>&gt;&lt; rhodanese-like domain-containing protein / PPIC-type PPIASE domain-containing protein</div> <div>&gt;&lt; ribosomal protein L1 family protein</div> <div>&gt;&lt; RNA binding</div> <div>&gt;&lt; RPS15AE (ribosomal protein S15A E); structural constituent of ribosome</div> <div>&gt;&lt; SDIR1 (SALT- AND DROUGHT-INDUCED RING FINGER1); protein binding / ubiquitin-protein ligase/ zinc ion binding</div> <div>&gt;&lt; similar to unknown [Populus trichocarpa] (GB:ABK93876.1) zinc finger (CCCH-type) family protein / RNA recognition motif (RRM)-containing protein</div> </div> |                                                                                                                                                                                                                                                                                                                                                                                                                                                                                                                                                                                                                                                                                                                                                                                                                                                                                                                                                                                                                                                                                                                                                                                                                                                                                                                                                                                                                                                                                                                                                                                                                                                                                                                                                                                                                                                                                                                                                                                                                                                                                                                                                                                                                                                                                                                                                                                                                                                                                                                                                                                                                                                                                                                                                                                                                                                                                                                                                                                                                                                                                                                                                                                                                                                                                                                                                                                                                                                                                                                                                                                                                                                                                                                                                                                                                                                                                                                                                                                                                                                                                                                                                                                                                                                                                                                                                                                                                                                                                                                                                                                                                                                                                                                                                                                                                                                                                                                                                                                                                                                                                                                                                                                                                                                                                                                                                                                                                                                                                                                                                                                                                                                                                                                                                                                                                                                                                                                                                                                                                                    |  |
| XY | XY1066 | 1066 | 9 | 5 | 0.9716 | 20.2933 | O21 - P2321 | LG_9 - 7.76 | - | CC1 | GO:0000398 | 121 | 3  | 51   | 1.22E-05   | 0.0002439 | nuclear mRNA splicing | <div> <div>No Hits</div> <div>&gt;&lt; AGD2 (ABERRANT GROWTH AND DEATH 2); transaminase</div> <div>&gt;&lt; ankyrin repeat family protein</div> <div>&gt;&lt; ATRBL1 (ARABIDOPSIS THALIANA RHOMBOID-LIKE 1)</div> <div>&gt;&lt; ATXDH1 (XANTHINE DEHYDROGENASE 1); xanthine dehydrogenase</div> <div>&gt;&lt; C2 domain-containing protein</div> <div>&gt;&lt; calcium-transporting ATPase</div> <div>&gt;&lt; CHR5 (chromatin remodeling 5); ATP binding / DNA binding / chromatin binding / helicase</div> <div>&gt;&lt; COPT1 (COPPER TRANSPORTER 1); copper ion transmembrane transporter</div> <div>&gt;&lt; F-box family protein</div> <div>&gt;&lt; histone H2B</div> <div>&gt;&lt; mthSC70-2</div> <div>&gt;&lt; PRLI-interacting factor</div> <div>&gt;&lt; PUX1 (PLANT UBX DOMAIN-CONTAINING PROTEIN 1)</div> <div>&gt;&lt; rhodanese-like domain-containing protein / PPIC-type PPIASE domain-containing protein</div> <div>&gt;&lt; ribosomal protein L1 family protein</div> <div>&gt;&lt; RNA binding</div> <div>&gt;&lt; RPS15AE (ribosomal protein S15A E); structural constituent of ribosome</div> <div>&gt;&lt; SDIR1 (SALT- AND DROUGHT-INDUCED RING FINGER1); protein binding / ubiquitin-protein ligase/ zinc ion binding</div> <div>&gt;&lt; similar to unknown [Populus trichocarpa] (GB:ABK93876.1) zinc finger (CCCH-type) family protein / RNA recognition motif (RRM)-containing protein</div> </div> |                                                                                                                                                                                                                                                                                                                                                                                                                                                                                                                                                                                                                                                                                                                                                                                                                                                                                                                                                                                                                                                                                                                                                                                                                                                                                                                                                                                                                                                                                                                                                                                                                                                                                                                                                                                                                                                                                                                                                                                                                                                                                                                                                                                                                                                                                                                                                                                                                                                                                                                                                                                                                                                                                                                                                                                                                                                                                                                                                                                                                                                                                                                                                                                                                                                                                                                                                                                                                                                                                                                                                                                                                                                                                                                                                                                                                                                                                                                                                                                                                                                                                                                                                                                                                                                                                                                                                                                                                                                                                                                                                                                                                                                                                                                                                                                                                                                                                                                                                                                                                                                                                                                                                                                                                                                                                                                                                                                                                                                                                                                                                                                                                                                                                                                                                                                                                                                                                                                                                                                                                                    |  |
| XY | XY1066 | 1066 | 9 | 5 | 0.9716 | 20.2933 | O21 - P2321 | LG_9 - 7.76 | - | CC1 | GO:0005730 | 121 | 8  | 488  | 1.18E-08   | 0.0002439 | nucleolus             | <div> <div>No Hits</div> <div>&gt;&lt; AGD2 (ABERRANT GROWTH AND DEATH 2); transaminase</div> <div>&gt;&lt; ankyrin repeat family protein</div> <div>&gt;&lt; ATRBL1 (ARABIDOPSIS THALIANA RHOMBOID-LIKE 1)</div> <div>&gt;&lt; ATXDH1 (XANTHINE DEHYDROGENASE 1); xanthine dehydrogenase</div> <div>&gt;&lt; C2 domain-containing protein</div> <div>&gt;&lt; calcium-transporting ATPase</div> <div>&gt;&lt; CHR5 (chromatin remodeling 5); ATP binding / DNA binding / chromatin binding / helicase</div> <div>&gt;&lt; COPT1 (COPPER TRANSPORTER 1); copper ion transmembrane transporter</div> <div>&gt;&lt; F-box family protein</div> <div>&gt;&lt; histone H2B</div> <div>&gt;&lt; mthSC70-2</div> <div>&gt;&lt; PRLI-interacting factor</div> <div>&gt;&lt; PUX1 (PLANT UBX DOMAIN-CONTAINING PROTEIN 1)</div> <div>&gt;&lt; rhodanese-like domain-containing protein / PPIC-type PPIASE domain-containing protein</div> <div>&gt;&lt; ribosomal protein L1 family protein</div> <div>&gt;&lt; RNA binding</div> <div>&gt;&lt; RPS15AE (ribosomal protein S15A E); structural constituent of ribosome</div> <div>&gt;&lt; SDIR1 (SALT- AND DROUGHT-INDUCED RING FINGER1); protein binding / ubiquitin-protein ligase/ zinc ion binding</div> <div>&gt;&lt; similar to unknown [Populus trichocarpa] (GB:ABK93876.1) zinc finger (CCCH-type) family protein / RNA recognition motif (RRM)-containing protein</div> </div> |                                                                                                                                                                                                                                                                                                                                                                                                                                                                                                                                                                                                                                                                                                                                                                                                                                                                                                                                                                                                                                                                                                                                                                                                                                                                                                                                                                                                                                                                                                                                                                                                                                                                                                                                                                                                                                                                                                                                                                                                                                                                                                                                                                                                                                                                                                                                                                                                                                                                                                                                                                                                                                                                                                                                                                                                                                                                                                                                                                                                                                                                                                                                                                                                                                                                                                                                                                                                                                                                                                                                                                                                                                                                                                                                                                                                                                                                                                                                                                                                                                                                                                                                                                                                                                                                                                                                                                                                                                                                                                                                                                                                                                                                                                                                                                                                                                                                                                                                                                                                                                                                                                                                                                                                                                                                                                                                                                                                                                                                                                                                                                                                                                                                                                                                                                                                                                                                                                                                                                                                                                    |  |
| XY | XY1066 | 1066 | 9 | 5 | 0.9716 | 20.2933 | O21 - P2321 | LG_9 - 7.76 | - | CC1 | GO:0005634 | 121 | 12 | 3084 | 1.43E-05   | 0.0002439 | nucleus               | <div> <div>No Hits</div> <div>&gt;&lt; AGD2 (ABERRANT GROWTH AND DEATH 2); transaminase</div> <div>&gt;&lt; ankyrin repeat family protein</div> <div>&gt;&lt; ATRBL1 (ARABIDOPSIS THALIANA RHOMBOID-LIKE 1)</div> <div>&gt;&lt; ATXDH1 (XANTHINE DEHYDROGENASE 1); xanthine dehydrogenase</div> <div>&gt;&lt; C2 domain-containing protein</div> <div>&gt;&lt; calcium-transporting ATPase</div> <div>&gt;&lt; CHR5 (chromatin remodeling 5); ATP binding / DNA binding / chromatin binding / helicase</div> <div>&gt;&lt; COPT1 (COPPER TRANSPORTER 1); copper ion transmembrane transporter</div> <div>&gt;&lt; F-box family protein</div> <div>&gt;&lt; histone H2B</div> <div>&gt;&lt; mthSC70-2</div> <div>&gt;&lt; PRLI-interacting factor</div> <div>&gt;&lt; PUX1 (PLANT UBX DOMAIN-CONTAINING PROTEIN 1)</div> <div>&gt;&lt; rhodanese-like domain-containing protein / PPIC-type PPIASE domain-containing protein</div> <div>&gt;&lt; ribosomal protein L1 family protein</div> <div>&gt;&lt; RNA binding</div> <div>&gt;&lt; RPS15AE (ribosomal protein S15A E); structural constituent of ribosome</div> <div>&gt;&lt; SDIR1 (SALT- AND DROUGHT-INDUCED RING FINGER1); protein binding / ubiquitin-protein ligase/ zinc ion binding</div> <div>&gt;&lt; similar to unknown [Populus trichocarpa] (GB:ABK93876.1) zinc finger (CCCH-type) family protein / RNA recognition motif (RRM)-containing protein</div> </div> |                                                                                                                                                                                                                                                                                                                                                                                                                                                                                                                                                                                                                                                                                                                                                                                                                                                                                                                                                                                                                                                                                                                                                                                                                                                                                                                                                                                                                                                                                                                                                                                                                                                                                                                                                                                                                                                                                                                                                                                                                                                                                                                                                                                                                                                                                                                                                                                                                                                                                                                                                                                                                                                                                                                                                                                                                                                                                                                                                                                                                                                                                                                                                                                                                                                                                                                                                                                                                                                                                                                                                                                                                                                                                                                                                                                                                                                                                                                                                                                                                                                                                                                                                                                                                                                                                                                                                                                                                                                                                                                                                                                                                                                                                                                                                                                                                                                                                                                                                                                                                                                                                                                                                                                                                                                                                                                                                                                                                                                                                                                                                                                                                                                                                                                                                                                                                                                                                                                                                                                                                                    |  |

[illegible]









[illegible]







[illegible]

[illegible]





|    |        |      |    |   |        |         |              |                |                |     |            |     |    |      |            |            |                                    |                                                                   |                                                                                                                  |
|----|--------|------|----|---|--------|---------|--------------|----------------|----------------|-----|------------|-----|----|------|------------|------------|------------------------------------|-------------------------------------------------------------------|------------------------------------------------------------------------------------------------------------------|
| XY | XY1643 | 1643 | 17 | 1 | 0.2801 | 31.1749 | E533 - E408  | scaffold_821 - | scaffold_170 - | CC2 | GO:0005515 | 101 | 12 | 2885 | 1.09E-06   | 0.00035971 | protein binding                    | no cis-eQTL-based regulator identified                            |                                                                                                                  |
| XY | XY1643 | 1643 | 17 | 1 | 0.2801 | 31.1749 | E533 - E408  | scaffold_821 - | scaffold_170 - | CC2 | GO:0007165 | 101 | 4  | 411  | 0.00022662 | 0.00035971 | signal transduction                | no cis-eQTL-based regulator identified                            |                                                                                                                  |
| XY | XY1643 | 1643 | 17 | 1 | 0.2801 | 31.1749 | E533 - E408  | scaffold_821 - | scaffold_170 - | CC2 | GO:0016757 | 101 | 5  | 584  | 6.63E-05   | 0.00035971 | transferase activity               | no cis-eQTL-based regulator identified                            |                                                                                                                  |
| XY | XY1643 | 1643 | 17 | 1 | 0.2801 | 31.1749 | E533 - E408  | scaffold_821 - | scaffold_170 - | CC2 | GO:0008270 | 101 | 6  | 1156 | 0.00018919 | 0.00035971 | zinc ion binding                   | no cis-eQTL-based regulator identified                            |                                                                                                                  |
| XY | XY1644 | 1644 | 17 | 2 | 0.295  | 31.1898 | E408 - G125  | scaffold_170 - | -              | CC1 | None       | 78  | .  | .    | .          | .          | n/a                                | no cis-eQTL-based regulator identified                            |                                                                                                                  |
| XY | XY1644 | 1644 | 17 | 2 | 0.295  | 31.1898 | E408 - G125  | scaffold_170 - | -              | CC1 | GO:0015995 | 78  | 2  | 45   | 0.00029065 | 0.00044643 | chlorophyll biosynthetic process   | no cis-eQTL-based regulator identified                            |                                                                                                                  |
| XY | XY1644 | 1644 | 17 | 2 | 0.295  | 31.1898 | E408 - G125  | scaffold_170 - | -              | CC1 | GO:0009507 | 78  | 10 | 4504 | 0.00018022 | 0.00044643 | chloroplast                        | no cis-eQTL-based regulator identified                            |                                                                                                                  |
| XY | XY1644 | 1644 | 17 | 2 | 0.295  | 31.1898 | E408 - G125  | scaffold_170 - | -              | CC1 | GO:0012505 | 78  | 10 | 4044 | 7.50E-05   | 0.00044643 | endomembrane system                | no cis-eQTL-based regulator identified                            |                                                                                                                  |
| XY | XY1644 | 1644 | 17 | 2 | 0.295  | 31.1898 | E408 - G125  | scaffold_170 - | -              | CC1 | None       | 78  | .  | .    | .          | .          | n/a                                | no cis-eQTL-based regulator identified                            |                                                                                                                  |
| XY | XY1644 | 1644 | 17 | 2 | 0.295  | 31.1898 | E408 - G125  | scaffold_170 - | -              | CC1 | GO:0006499 | 78  | 4  | 573  | 0.00029594 | 0.00044643 | N-terminal protein myristoylation  | no cis-eQTL-based regulator identified                            |                                                                                                                  |
| XY | XY1644 | 1644 | 17 | 2 | 0.295  | 31.1898 | E408 - G125  | scaffold_170 - | -              | CC1 | GO:0005515 | 78  | 10 | 2885 | 4.24E-06   | 0.00044643 | protein binding                    | no cis-eQTL-based regulator identified                            |                                                                                                                  |
| XY | XY1644 | 1644 | 17 | 2 | 0.295  | 31.1898 | E408 - G125  | scaffold_170 - | -              | CC1 | GO:0007165 | 78  | 4  | 411  | 8.34E-05   | 0.00044643 | signal transduction                | no cis-eQTL-based regulator identified                            |                                                                                                                  |
| XY | XY1664 | 1664 | 17 | 3 | 0.6805 | 31.5753 | G125 - rG880 | -              | scaffold_64 -  | CC1 | None       | 22  | .  | .    | .          | .          | n/a                                | eugene3.00640244                                                  | SPL12 (SQUAMOSA PROMOTER-BINDING PROTEIN-LIKE 12); transcription factor                                          |
| XY | XY1664 | 1664 | 17 | 3 | 0.6805 | 31.5753 | G125 - rG880 | -              | scaffold_64 -  | CC2 | None       | 22  | .  | .    | .          | .          | n/a                                | no cis-eQTL-based regulator identified                            |                                                                                                                  |
| XY | XY1664 | 1664 | 17 | 3 | 0.6805 | 31.5753 | G125 - rG880 | -              | scaffold_64 -  | CC2 | GO:0006468 | 22  | 4  | 2083 | 0.00027391 | 0.00151515 | protein amino acid phosphorylation | no cis-eQTL-based regulator identified                            |                                                                                                                  |
| XY | XY1664 | 1664 | 17 | 3 | 0.6805 | 31.5753 | G125 - rG880 | -              | scaffold_64 -  | CC3 | None       | 13  | .  | .    | .          | .          | n/a                                | fgenes4_pg.C_scaffold_170000040                                   | RLK902 (receptor-like kinase 902); ATP binding / kinase/ protein serine/threonine kinase                         |
| XY | XY1666 | 1666 | 17 | 3 | 0.7205 | 31.6153 | G125 - rG880 | -              | scaffold_64 -  | CC1 | None       | 46  | .  | .    | .          | .          | n/a                                | no cis-eQTL-based regulator identified                            |                                                                                                                  |
| XY | XY1666 | 1666 | 17 | 3 | 0.7205 | 31.6153 | G125 - rG880 | -              | scaffold_64 -  | CC2 | None       | 39  | .  | .    | .          | .          | n/a                                | fgenes4_pg.C_scaffold_64000001 >< fgenes4_pg.C_scaffold_170000040 | F-box family protein >< RLK902 (receptor-like kinase 902); ATP binding / kinase/ protein serine/threonine kinase |
| XY | XY1667 | 1667 | 17 | 3 | 0.7405 | 31.6353 | G125 - rG880 | -              | scaffold_64 -  | CC1 | None       | 48  | .  | .    | .          | .          | n/a                                | no cis-eQTL-based regulator identified                            |                                                                                                                  |
| XY | XY1667 | 1667 | 17 | 3 | 0.7405 | 31.6353 | G125 - rG880 | -              | scaffold_64 -  | CC2 | None       | 39  | .  | .    | .          | .          | n/a                                | fgenes4_pg.C_scaffold_64000001 >< fgenes4_pg.C_scaffold_170000040 | F-box family protein >< RLK902 (receptor-like kinase 902); ATP binding / kinase/ protein serine/threonine kinase |

**Table S7.** Annotation of members and putative regulators of a leaf-specific co-expression network enriched for chloroplast biogenesis and functionality.

| Gene Model                        | Network Edges | Best Hit (Arabidopsis) | Description/Function                                                                                                                                 | Chloroplast Associated <sup>a</sup> | Cis-regulated | Candidate Regulator | Gene ID# Figure 4 |
|-----------------------------------|---------------|------------------------|------------------------------------------------------------------------------------------------------------------------------------------------------|-------------------------------------|---------------|---------------------|-------------------|
| estExt_Genewise1_v1.C_LG_I7940    | 4             | AT1G29880              | glycyl-tRNA synthetase / glycine--tRNA ligase                                                                                                        | N                                   | N             |                     | 1                 |
| estExt_Genewise1_v1.C_LG_IV2768   | 2             | AT3G15010              | RNA recognition motif (RRM)-containing protein                                                                                                       | N                                   | N             |                     | 2                 |
| estExt_Genewise1_v1.C_LG_IX1928   | 2             | AT1G49380              | cytochrome c biogenesis protein family                                                                                                               | Y                                   | N             |                     | 3                 |
| estExt_Genewise1_v1.C_LG_VI1166   | 1             | AT3G52750              | FTSZ2-2 (FtsZ2-2); structural molecule                                                                                                               | Y                                   | Y             | √                   | 4                 |
| estExt_Genewise1_v1.C_LG_X3683    | 15            | AT3G06980              | DEAD/DEAH box helicase                                                                                                                               | Y                                   | N             |                     | 5                 |
| estExt_Genewise1_v1.C_LG_XIII0363 | 21            | AT5G58250              | similar to hypothetical protein [Vitis vinifera] (GB:CAN75840.1); contains domain PD020337 (PD020337)                                                | Y                                   | N             |                     | 6                 |
| estExt_Genewise1_v1.C_LG_XV1465   | 3             | AT5G62840              | phosphoglycerate/bisphosphoglycerate mutase family protein                                                                                           | Y                                   | N             |                     | 7                 |
| estExt_fgenes4_kg.C_LG_I0088      | 14            | AT4G34290              | SWIB complex BAF60b domain-containing protein                                                                                                        | Y                                   | N             |                     | 8                 |
| estExt_fgenes4_kg.C_LG_XV0016     | 7             | AT3G48680              | GAMMA CAL2 (GAMMA CARBONIC ANHYDRASE-LIKE 2); acyltransferase/transferase                                                                            | Y                                   | N             |                     | 9                 |
| estExt_fgenes4_pg.C_LG_I2552      | 3             | AT5G08650              | GTP-binding protein LepA                                                                                                                             | Y                                   | N             |                     | 10                |
| estExt_fgenes4_pg.C_LG_VI0491     | 15            | AT4G02530              | chloroplast thylakoid lumen protein                                                                                                                  | Y                                   | Y             | √                   | 11                |
| estExt_fgenes4_pg.C_LG_VI1540     | 1             | AT4G33030              | SQD1 (sulfoquinovosyldiacylglycerol 1); UDPsulfoquinovose synthase                                                                                   | Y                                   | N             |                     | 12                |
| estExt_fgenes4_pg.C_LG_XIX0756    | 2             | AT1G35680              | 50S ribosomal protein L21                                                                                                                            | Y                                   | N             |                     | 13                |
| estExt_fgenes4_pg.C_LG_XVII0327   | 11            | AT3G01280              | porin                                                                                                                                                | Y                                   | N             |                     | 14                |
| estExt_fgenes4_pm.C_LG_IX0206     | 7             | AT2G21250              | mannose 6-phosphate reductase (NADPH-dependent)                                                                                                      | N                                   | N             |                     | 15                |
| estExt_fgenes4_pm.C_LG_IX0706     | 11            | AT2G28000              | SLP                                                                                                                                                  | Y                                   | N             |                     | 16                |
| estExt_fgenes4_pm.C_LG_V0614      | 1             | AT3G49990              | similar to unnamed protein product [Vitis vinifera] (GB:CAO61051.1); contains InterPro domain Low temperature viability protein (InterPro:IPR007307) | N                                   | N             |                     | 17                |
| eugene3.00011927                  | 17            | AT5G14910              | heavy-metal-associated domain-containing protein                                                                                                     | Y                                   | N             |                     | 18                |
| eugene3.00031286                  | 1             | AT5G47900              | similar to unknown protein [Arabidopsis thaliana] (TAIR:AT5G27730.1); similar to unnamed protein product [Vitis vinifera] (GB:CAO68737.1)            | N                                   | N             |                     | 19                |
| eugene3.00060837                  | 5             | AT3G09050              | similar to unknown [Populus trichocarpa x Populus deltoides] (GB:ABK96465.1)                                                                         | Y                                   | Y             |                     | 20                |

|                            |    |           |                                                                                                                                                                                                                                                                                                                                    |   |   |   |    |
|----------------------------|----|-----------|------------------------------------------------------------------------------------------------------------------------------------------------------------------------------------------------------------------------------------------------------------------------------------------------------------------------------------|---|---|---|----|
| eugene3.00111342           | 3  | AT5G44450 | similar to hypothetical protein Osl_013284 [Oryza sativa (indica cultivar-group)] (GB:EAY92051.1); similar to unknown protein [Oryza sativa (japonica cultivar-group)] (GB:AAK09232.1); contains InterPro domain Protein of unknown function DUF858                                                                                | Y | N |   | 21 |
| eugene3.00190981           | 2  | AT1G06950 | TIC110                                                                                                                                                                                                                                                                                                                             | Y | N |   | 22 |
| fgenes4_pg.C_LG_VI000277   | 9  | AT3G56650 | thylakoid lumenal 20 kDa protein                                                                                                                                                                                                                                                                                                   | Y | N |   | 23 |
| fgenes4_pg.C_LG_VIII001084 | 20 | AT3G25920 | RPL15 (ribosomal protein L15)                                                                                                                                                                                                                                                                                                      | Y | N |   | 24 |
| fgenes4_pm.C_LG_VIII000641 | 3  | AT1G14270 | CAAX amino terminal protease family protein                                                                                                                                                                                                                                                                                        | N | N |   | 25 |
| grail3.0003038902          | 2  | AT3G63410 | APG1                                                                                                                                                                                                                                                                                                                               | Y | N |   | 26 |
| grail3.0013033101          | 8  | AT5G11450 | oxygen-evolving complex-related                                                                                                                                                                                                                                                                                                    | Y | N |   | 27 |
| grail3.0023008101          | 1  | AT5G57170 | macrophage migration inhibitory factor family protein / MIF family protein                                                                                                                                                                                                                                                         | Y | Y |   | 28 |
| grail3.0024031501          | 2  | AT2G41530 | ATSGFH (ARABIDOPSIS THALIANA S-FORMYLGLUTATHIONE HYDROLASE); S-formylglutathione hydrolase/ hydrolase                                                                                                                                                                                                                              | N | Y |   | 29 |
| gw1.I.1156.1               | 7  | AT5G59250 | sugar transporter family protein                                                                                                                                                                                                                                                                                                   | Y | N |   | 30 |
| gw1.I.5571.1               | 12 | AT1G32990 | PRPL11 (PLASTID RIBOSOMAL PROTEIN L11); structural constituent of ribosome                                                                                                                                                                                                                                                         | Y | N |   | 31 |
| gw1.I.976.1                | 4  | AT2G29650 | inorganic phosphate transporter                                                                                                                                                                                                                                                                                                    | Y | N |   | 32 |
| gw1.IV.11.1                | 1  | AT3G29185 | similar to hypothetical protein MtrDRAFT_AC147482g2v2 [Medicago truncatula] (GB:ABD32485.1)                                                                                                                                                                                                                                        | Y | N |   | 33 |
| gw1.IV.1864.1              | 5  | AT4G21210 | phosphoprotein phosphatase/ protein kinase                                                                                                                                                                                                                                                                                         | Y | N |   | 34 |
| gw1.IV.3048.1              | 22 | AT2G33800 | ribosomal protein S5 family protein                                                                                                                                                                                                                                                                                                | Y | N |   | 35 |
| gw1.VI.2404.1              | 11 | AT2G41680 | thioredoxin reductase                                                                                                                                                                                                                                                                                                              | Y | Y | v | 36 |
| gw1.VII.4002.1             | 2  | AT5G65470 | similar to unknown protein [Arabidopsis thaliana] (TAIR:AT4G24530.1); similar to unnamed protein product [Vitis vinifera] (GB:CAO61608.1); similar to unknown [Populus trichocarpa] (GB:ABK95421.1); similar to hypothetical protein [Vitis vinifera] (GB:CAN78778.1); contains InterPro domain Protein of unknown function DUF246 | N | N |   | 37 |
| gw1.X.2172.1               | 1  | AT3G55460 | SCL30 (SC35-like splicing factor 30); RNA binding                                                                                                                                                                                                                                                                                  | N | N |   | 38 |
| gw1.X.2264.1               | 7  | AT3G55400 | OVA1 (OVULE ABORTION 1); ATP binding / aminoacyl-tRNA ligase                                                                                                                                                                                                                                                                       | Y | N |   | 39 |
| gw1.XIII.1619.1            | 2  | AT3G04550 | similar to unknown protein [Arabidopsis thaliana] (TAIR:AT5G28500.1); similar to unnamed protein product [Vitis vinifera] (GB:CAO65032.1)                                                                                                                                                                                          | Y | N |   | 40 |

|                   |    |           |                                                                                                                                                                                                 |   |   |    |
|-------------------|----|-----------|-------------------------------------------------------------------------------------------------------------------------------------------------------------------------------------------------|---|---|----|
| eugene3.00440183  | 5  | AT1G65720 | similar to hypothetical protein [Vitis vinifera] (GB:CAN83711.1); similar to unnamed protein product [Vitis vinifera] (GB:CAO22167.1); similar to unknown [Populus trichocarpa] (GB:ABK94059.1) | N | N | 41 |
| eugene3.00860035  | 3  | AT4G24280 | CPHSC70-1 (chloroplast heat shock protein 70-1); ATP binding / unfolded protein binding                                                                                                         | Y | N | 42 |
| eugene3.01180078  | 6  | AT4G17090 | BAM3                                                                                                                                                                                            | Y | N | 43 |
| eugene3.01570036  | 13 | AT1G67280 | lactoylgutathione lyase                                                                                                                                                                         | Y | N | 44 |
| grail3.0107000401 | 15 | AT3G15190 | chloroplast 30S ribosomal protein S20                                                                                                                                                           | Y | N | 45 |
| gw1.16424.1.1     | 2  | AT3G14600 | 60S ribosomal protein L18A (RPL18aC)                                                                                                                                                            | N | N | 46 |
| gw1.210.7.1       | 1  | AT5G49020 | protein arginine N-methyltransferase family protein                                                                                                                                             | N | N | 47 |
| gw1.129.1.1       | 3  | AT1G74730 | similar to unknown [Populus trichocarpa x Populus deltoides] (GB:ABK96654.1); contains InterPro domain Protein of unknown function DUF1118 (InterPro:IPR009500)                                 | Y | N | 48 |
| gw1.XVI.617.1     | 3  | AT4G16390 | chloroplastic RNA-binding protein P67                                                                                                                                                           | Y | N | 49 |

<sup>a</sup>Chloroplast association judged by membership in GO category GO:009507 (chloroplast) or its associated daughter terms in the GO hierarchy.

**Table S8.** Significantly enriched regulatory motifs in in leaf (LF), xylem (XY) and root (RT) networks.

| Tissue | Network |          | Network | Motif Seq  | Two-Tailed<br>Fisher P-<br>value | One Tail<br>(enriched)<br>Fisher P-<br>value | Non-<br>network<br>Present | Network<br>Present | Non-<br>network<br>Absent | Network<br>Absent | Bonferroni<br>P-value<br>Threshold | Motif ID              | Functional Descriptor                                                                                                                                                                                                                                                                                                                                                                                                                |
|--------|---------|----------|---------|------------|----------------------------------|----------------------------------------------|----------------------------|--------------------|---------------------------|-------------------|------------------------------------|-----------------------|--------------------------------------------------------------------------------------------------------------------------------------------------------------------------------------------------------------------------------------------------------------------------------------------------------------------------------------------------------------------------------------------------------------------------------------|
|        | ID      | Interval |         |            |                                  |                                              |                            |                    |                           |                   |                                    |                       |                                                                                                                                                                                                                                                                                                                                                                                                                                      |
| LF     | LF1     | 1        | CC1     | AGATC      | 0.00020636                       | 0.00012364                                   | 36325                      | 30                 | 12711                     | 0                 | 0.00013889                         | CARg                  | Plant polyA signal; Consensus sequence for plant polyadenylation signal; Pyrimidine box found in rice (O.s.) alpha-amylase (RAmy1A) gene; Gibberellin-respons cis-element of GARE and pyrimidine box are partially involved in sugar repression; Found in the promoter of barley alpha-amylase (Amy2/32b) gene which is induced in the aleurone layers in response to GA; BPBF protein binds specifically to this site; See S000265; |
| LF     | LF734   | 734      | CC1     | AATAAT     | 0.00011027                       | 0.00006129                                   | 40368                      | 50                 | 8648                      | 0                 | 0.00013889                         | POLASIG3              |                                                                                                                                                                                                                                                                                                                                                                                                                                      |
| LF     | LF734   | 734      | CC1     | CCTTTT     | 0.00019512                       | 0.00010119                                   | 35297                      | 47                 | 13719                     | 3                 | 0.00013889                         | PYRIMIDINEBOXOSRAMY1A | T-Box; Motif found in SAR (scaffold attachment region; or matrix attachment region, MAR);                                                                                                                                                                                                                                                                                                                                            |
| LF     | LF734   | 734      | CC1     | TTWTWTTWTT | 0.00012048                       | 8.35E-05                                     | 35127                      | 47                 | 13889                     | 3                 | 0.00013889                         | MARTBOX               | Inr (initiator) elements found in the tobacco psaDb gene promoter without TATA boxes; Light-responsive transcription of psaDb depends on Inr, but not TATA box;                                                                                                                                                                                                                                                                      |
| LF     | LF734   | 734      | CC1     | YTCANTYY   | 0.00018461                       | 0.00011776                                   | 40899                      | 50                 | 8117                      | 0                 | 0.00013889                         | INRNTPSADB            | SEF3binding site; Soybean (G.m.) consensus sequence found in the 5' upstream region of beta-conglycinin (7S globulin) gene; AACCCA(-27bp-                                                                                                                                                                                                                                                                                            |
| LF     | LF738   | 738      | CC1     | AACCCA     | 1.43E-05                         | 7.78E-06                                     | 25655                      | 42                 | 23360                     | 9                 | 0.00013889                         | SEF3MOTIFGM           | )AACCCA; SEF=soybean embryo factor; SEF2; SEF3; SEF4;                                                                                                                                                                                                                                                                                                                                                                                |
| LF     | LF738   | 738      | CC1     | AATAAT     | 0.00011997                       | 5.05E-05                                     | 40367                      | 51                 | 8648                      | 0                 | 0.00013889                         | POLASIG3              | Plant polyA signal; Consensus sequence for plant polyadenylation signal; T-Box; Motif found in SAR (scaffold attachment region; or matrix attachment region, MAR);                                                                                                                                                                                                                                                                   |
| LF     | LF738   | 738      | CC1     | TTWTWTTWTT | 0.00001437                       | 9.26E-06                                     | 35125                      | 49                 | 13890                     | 2                 | 0.00013889                         | MARTBOX               | Inr (initiator) elements found in the tobacco psaDb gene promoter without TATA boxes; Light-responsive transcription of psaDb depends on Inr, but not TATA box;                                                                                                                                                                                                                                                                      |
| LF     | LF738   | 738      | CC1     | YTCANTYY   | 0.00019122                       | 9.83E-05                                     | 40898                      | 51                 | 8117                      | 0                 | 0.00013889                         | INRNTPSADB            | ABA responsive element (ABRE) of wheat Em and rice (O.s.) rab21genes; Proposed consensus sequence for the repeated motif (Em1a and Em1b) of wheat Em gene; S=C/G;                                                                                                                                                                                                                                                                    |
| LF     | LF1219  | 1219     | CC1     | ACGTSSSC   | 3.22E-05                         | 3.22E-05                                     | 1987                       | 9                  | 47038                     | 32                | 0.00013889                         | ABREOSRAB21           | Core of GCC-box found in many pathogen-responsive genes such as PDF1.2, Thi2.1, and PR4; Has been shown to function as ethylene-responsive element; See S000036, S000232, S000332; Appears to play important roles in regulating jasmonate-responsive gene expression; Tomato Pti4 (ERF) regulates defence-related gene expression via GCC box and non-GCC box cis elements (Myb1(GTTAGTT) and G-box(CACGTG));                       |
| LF     | LF1219  | 1219     | CC1     | GCCGCC     | 5.57E-05                         | 5.57E-05                                     | 4554                       | 13                 | 44471                     | 28                | 0.00013889                         | GCCCORE               | ABA responsive element (ABRE) of wheat Em and rice (O.s.) rab21genes; Proposed consensus sequence for the repeated motif (Em1a and Em1b) of wheat Em gene; S=C/G;                                                                                                                                                                                                                                                                    |
| LF     | LF1220  | 1220     | CC1     | ACGTSSSC   | 4.81E-05                         | 4.81E-05                                     | 1984                       | 12                 | 47007                     | 63                | 0.00013889                         | ABREOSRAB21           | Core of GCC-box found in many pathogen-responsive genes such as PDF1.2, Thi2.1, and PR4; Has been shown to function as ethylene-responsive element; See S000036, S000232, S000332; Appears to play important roles in regulating jasmonate-responsive gene expression; Tomato Pti4 (ERF) regulates defence-related gene expression via GCC box and non-GCC box cis elements (Myb1(GTTAGTT) and G-box(CACGTG));                       |
| LF     | LF1220  | 1220     | CC1     | GCCGCC     | 7.91E-09                         | 7.91E-09                                     | 4542                       | 25                 | 44449                     | 50                | 0.00013889                         | GCCCORE               | CGCG box recognized by AtSR1-6 (Arabidopsis thaliana signal-responsive genes); Multiple CGCG elements are found in promoters of many genes; Ca++/calmodulin binds to all AtSRs; V=A/C/G; B=G/T/C;                                                                                                                                                                                                                                    |
| LF     | LF1220  | 1220     | CC1     | VCGCGB     | 2.02E-05                         | 1.21E-05                                     | 11096                      | 34                 | 37895                     | 41                | 0.00013889                         | CGCGBOXAT             | ABA responsive element (ABRE) of wheat Em and rice (O.s.) rab21genes; Proposed consensus sequence for the repeated motif (Em1a and Em1b) of wheat Em gene; S=C/G;                                                                                                                                                                                                                                                                    |
| LF     | LF1221  | 1221     | CC1     | ACGTSSSC   | 5.40E-06                         | 5.40E-06                                     | 1980                       | 16                 | 46981                     | 89                | 0.00013889                         | ABREOSRAB21           | AGC box repeated twice in a 61bp enhancer element in tobacco (N.p.) class I                                                                                                                                                                                                                                                                                                                                                          |
| LF     | LF1221  | 1221     | CC1     | AGCCGCC    | 9.78E-05                         | 9.78E-05                                     | 1500                       | 12                 | 47461                     | 93                | 0.00013889                         | AGCBOXNPGLB           |                                                                                                                                                                                                                                                                                                                                                                                                                                      |

|    |        |      |     |          |            |          |       |    |       |     |            |              |                                                                                                                                                                                                                                                                                                                                                                                                                                                                                                                                                                                                                                                                                                                                                                                                                                                                                                                                                                                                                                                                                                                                                                                                                                                                                                                                                                                                                                                                                                                                                                                                                                                                                                                                                                                                                                                                                                                                                                                                                                                                                                                                                                                                                                                                                                                                                                                                                                                                                                                                                                                                                                                                                                                                                                                                                                                                                                                                                                                                                                                                                                                                                                                                                                                                                                                                                                                                                                                                                                                                                                                                                                                                        |
|----|--------|------|-----|----------|------------|----------|-------|----|-------|-----|------------|--------------|------------------------------------------------------------------------------------------------------------------------------------------------------------------------------------------------------------------------------------------------------------------------------------------------------------------------------------------------------------------------------------------------------------------------------------------------------------------------------------------------------------------------------------------------------------------------------------------------------------------------------------------------------------------------------------------------------------------------------------------------------------------------------------------------------------------------------------------------------------------------------------------------------------------------------------------------------------------------------------------------------------------------------------------------------------------------------------------------------------------------------------------------------------------------------------------------------------------------------------------------------------------------------------------------------------------------------------------------------------------------------------------------------------------------------------------------------------------------------------------------------------------------------------------------------------------------------------------------------------------------------------------------------------------------------------------------------------------------------------------------------------------------------------------------------------------------------------------------------------------------------------------------------------------------------------------------------------------------------------------------------------------------------------------------------------------------------------------------------------------------------------------------------------------------------------------------------------------------------------------------------------------------------------------------------------------------------------------------------------------------------------------------------------------------------------------------------------------------------------------------------------------------------------------------------------------------------------------------------------------------------------------------------------------------------------------------------------------------------------------------------------------------------------------------------------------------------------------------------------------------------------------------------------------------------------------------------------------------------------------------------------------------------------------------------------------------------------------------------------------------------------------------------------------------------------------------------------------------------------------------------------------------------------------------------------------------------------------------------------------------------------------------------------------------------------------------------------------------------------------------------------------------------------------------------------------------------------------------------------------------------------------------------------------------|
| LF | LF1221 | 1221 | CC1 | AGCGGG   | 3.30E-06   | 3.30E-06 | 4283  | 25 | 44678 | 80  | 0.00013889 | BS1EGCCR     | <p>beta-1,3-glucanase (GLB) gene; See S000036, S000089; "GCC-box"; Binding sequence of Arabidopsis AtERFs; AtERF1,2and 5 functioned as activators of GCC box-dependent transcription; AtERF3and 4 acted as repressors; AtERF proteins are stress signal-response factors; EREBP2binding site; Conserved in most PR-protein genes; Rice MAPK (BWMK1) phosphorylates OS EREBP1, which enhance DNA-binding activity of the factor to the GCC box; BS1(binding site 1) found in E. gunnii Cinnamoyl-CoA reductase (CCR) gene promoter; nuclear protein binding site; Required for vascular expression; Site I of rice (O.s.) PCNA (proliferating cell nuclear antigen) gene; Found at -201to -194; Resemble G-box; May contribute in part to transcriptional activation; Core of GCC-box found in many pathogen-responsive genes such as PDF1.2, Thi2.1, and PR4; Has been shown to function as ethylene-responsive element; See S000036, S000232, S000332; Appears to play important roles in regulating jasmonate-responsive gene expression; Tomato Pti4 (ERF) regulates defence-related gene expression via GCC box and non-GCC box cis elements (Myb1(GTTAGTT) and G-box(CACGTG)); Core motif of DRE/CRT (dehydration-responsive element/C-repeat) cis-acting element found in many genes in Arabidopsis and in rice; R=G/A; Os DREB1A bound to GCCGAC more preferentially than to ACCGAC whereas At DREB1A bound to both GCCGAC and ACCGAC efficiently; See S000402(ACCGAC); Maize ZmDREB1A bound to DRE (Qin et al. 2004); HaDREB2in Helianthus annuus (sunflower)(Diaz-Martin et al. 2005); HaDREB2physically interact with HaHSFA9 in vitro (Diaz-Martin et al. 2005); CGCG box recognized by AtSR1-6 (Arabidopsis thaliana signal-responsive genes); Multiple CGCG elements are found in promoters of many genes; Ca++/calmodulin binds to all AtSRs; V=A/C/G; B=G/T/C; ABA responsive element (ABRE) of wheat Em and rice (O.s.) rab21genes; Proposed consensus sequence for the repeated motif (Em1a and Em1b) of wheat Em gene; S=C/G; BS1(binding site 1) found in E. gunnii Cinnamoyl-CoA reductase (CCR) gene promoter; nuclear protein binding site; Required for vascular expression; Core of GCC-box found in many pathogen-responsive genes such as PDF1.2, Thi2.1, and PR4; Has been shown to function as ethylene-responsive element; See S000036, S000232, S000332; Appears to play important roles in regulating jasmonate-responsive gene expression; Tomato Pti4 (ERF) regulates defence-related gene expression via GCC box and non-GCC box cis elements (Myb1(GTTAGTT) and G-box(CACGTG)); CGCG box recognized by AtSR1-6 (Arabidopsis thaliana signal-responsive genes); Multiple CGCG elements are found in promoters of many genes; Ca++/calmodulin binds to all AtSRs; V=A/C/G; B=G/T/C; ABA responsive element (ABRE) of wheat Em and rice (O.s.) rab21genes; Proposed consensus sequence for the repeated motif (Em1a and Em1b) of wheat Em gene; S=C/G; AGC box repeated twice in a 61bp enhancer element in tobacco (N.p.) class I beta-1,3-glucanase (GLB) gene; See S000036, S000089; "GCC-box"; Binding sequence of Arabidopsis AtERFs; AtERF1,2and 5 functioned as activators of GCC box-dependent transcription; AtERF3and 4 acted as repressors; AtERF proteins are stress signal-response factors; EREBP2binding site; Conserved in most PR-protein genes; Rice MAPK (BWMK1) phosphorylates OS EREBP1, which enhance DNA-binding activity of the factor to the GCC box; BS1(binding site 1) found in E. gunnii Cinnamoyl-CoA reductase (CCR) gene promoter; nuclear protein binding site; Required for vascular expression;</p> |
| LF | LF1221 | 1221 | CC1 | CCAGGTGG | 4.99E-05   | 4.99E-05 | 597   | 8  | 48364 | 97  | 0.00013889 | SITEIOSPCNA  |                                                                                                                                                                                                                                                                                                                                                                                                                                                                                                                                                                                                                                                                                                                                                                                                                                                                                                                                                                                                                                                                                                                                                                                                                                                                                                                                                                                                                                                                                                                                                                                                                                                                                                                                                                                                                                                                                                                                                                                                                                                                                                                                                                                                                                                                                                                                                                                                                                                                                                                                                                                                                                                                                                                                                                                                                                                                                                                                                                                                                                                                                                                                                                                                                                                                                                                                                                                                                                                                                                                                                                                                                                                                        |
| LF | LF1221 | 1221 | CC1 | GCCGCC   | 9.00E-10   | 9.00E-10 | 4535  | 32 | 44426 | 73  | 0.00013889 | GCCCORE      |                                                                                                                                                                                                                                                                                                                                                                                                                                                                                                                                                                                                                                                                                                                                                                                                                                                                                                                                                                                                                                                                                                                                                                                                                                                                                                                                                                                                                                                                                                                                                                                                                                                                                                                                                                                                                                                                                                                                                                                                                                                                                                                                                                                                                                                                                                                                                                                                                                                                                                                                                                                                                                                                                                                                                                                                                                                                                                                                                                                                                                                                                                                                                                                                                                                                                                                                                                                                                                                                                                                                                                                                                                                                        |
| LF | LF1221 | 1221 | CC1 | RCCGAC   | 6.11E-05   | 4.92E-05 | 10294 | 40 | 38667 | 65  | 0.00013889 | DRECRTCOREAT |                                                                                                                                                                                                                                                                                                                                                                                                                                                                                                                                                                                                                                                                                                                                                                                                                                                                                                                                                                                                                                                                                                                                                                                                                                                                                                                                                                                                                                                                                                                                                                                                                                                                                                                                                                                                                                                                                                                                                                                                                                                                                                                                                                                                                                                                                                                                                                                                                                                                                                                                                                                                                                                                                                                                                                                                                                                                                                                                                                                                                                                                                                                                                                                                                                                                                                                                                                                                                                                                                                                                                                                                                                                                        |
| LF | LF1221 | 1221 | CC1 | VCGCGB   | 2.66E-08   | 1.71E-08 | 11080 | 50 | 37881 | 55  | 0.00013889 | CGCGBOXAT    |                                                                                                                                                                                                                                                                                                                                                                                                                                                                                                                                                                                                                                                                                                                                                                                                                                                                                                                                                                                                                                                                                                                                                                                                                                                                                                                                                                                                                                                                                                                                                                                                                                                                                                                                                                                                                                                                                                                                                                                                                                                                                                                                                                                                                                                                                                                                                                                                                                                                                                                                                                                                                                                                                                                                                                                                                                                                                                                                                                                                                                                                                                                                                                                                                                                                                                                                                                                                                                                                                                                                                                                                                                                                        |
| LF | LF1222 | 1222 | CC1 | ACGTSSSC | 4.54E-05   | 4.54E-05 | 1980  | 16 | 46962 | 108 | 0.00013889 | ABREOSRAB21  |                                                                                                                                                                                                                                                                                                                                                                                                                                                                                                                                                                                                                                                                                                                                                                                                                                                                                                                                                                                                                                                                                                                                                                                                                                                                                                                                                                                                                                                                                                                                                                                                                                                                                                                                                                                                                                                                                                                                                                                                                                                                                                                                                                                                                                                                                                                                                                                                                                                                                                                                                                                                                                                                                                                                                                                                                                                                                                                                                                                                                                                                                                                                                                                                                                                                                                                                                                                                                                                                                                                                                                                                                                                                        |
| LF | LF1222 | 1222 | CC1 | AGCGGG   | 0.00007947 | 6.84E-05 | 4283  | 25 | 44659 | 99  | 0.00013889 | BS1EGCCR     |                                                                                                                                                                                                                                                                                                                                                                                                                                                                                                                                                                                                                                                                                                                                                                                                                                                                                                                                                                                                                                                                                                                                                                                                                                                                                                                                                                                                                                                                                                                                                                                                                                                                                                                                                                                                                                                                                                                                                                                                                                                                                                                                                                                                                                                                                                                                                                                                                                                                                                                                                                                                                                                                                                                                                                                                                                                                                                                                                                                                                                                                                                                                                                                                                                                                                                                                                                                                                                                                                                                                                                                                                                                                        |
| LF | LF1222 | 1222 | CC1 | GCCGCC   | 2.15E-08   | 2.15E-08 | 4534  | 33 | 44408 | 91  | 0.00013889 | GCCCORE      |                                                                                                                                                                                                                                                                                                                                                                                                                                                                                                                                                                                                                                                                                                                                                                                                                                                                                                                                                                                                                                                                                                                                                                                                                                                                                                                                                                                                                                                                                                                                                                                                                                                                                                                                                                                                                                                                                                                                                                                                                                                                                                                                                                                                                                                                                                                                                                                                                                                                                                                                                                                                                                                                                                                                                                                                                                                                                                                                                                                                                                                                                                                                                                                                                                                                                                                                                                                                                                                                                                                                                                                                                                                                        |
| LF | LF1222 | 1222 | CC1 | VCGCGB   | 1.20E-07   | 7.39E-08 | 11075 | 55 | 37867 | 69  | 0.00013889 | CGCGBOXAT    |                                                                                                                                                                                                                                                                                                                                                                                                                                                                                                                                                                                                                                                                                                                                                                                                                                                                                                                                                                                                                                                                                                                                                                                                                                                                                                                                                                                                                                                                                                                                                                                                                                                                                                                                                                                                                                                                                                                                                                                                                                                                                                                                                                                                                                                                                                                                                                                                                                                                                                                                                                                                                                                                                                                                                                                                                                                                                                                                                                                                                                                                                                                                                                                                                                                                                                                                                                                                                                                                                                                                                                                                                                                                        |
| LF | LF1223 | 1223 | CC1 | ACGTSSSC | 2.63E-06   | 2.63E-06 | 1976  | 20 | 46942 | 128 | 0.00013889 | ABREOSRAB21  |                                                                                                                                                                                                                                                                                                                                                                                                                                                                                                                                                                                                                                                                                                                                                                                                                                                                                                                                                                                                                                                                                                                                                                                                                                                                                                                                                                                                                                                                                                                                                                                                                                                                                                                                                                                                                                                                                                                                                                                                                                                                                                                                                                                                                                                                                                                                                                                                                                                                                                                                                                                                                                                                                                                                                                                                                                                                                                                                                                                                                                                                                                                                                                                                                                                                                                                                                                                                                                                                                                                                                                                                                                                                        |
| LF | LF1223 | 1223 | CC1 | AGCCGCC  | 5.72E-05   | 5.72E-05 | 1497  | 15 | 47421 | 133 | 0.00013889 | AGCBOXNPGLB  |                                                                                                                                                                                                                                                                                                                                                                                                                                                                                                                                                                                                                                                                                                                                                                                                                                                                                                                                                                                                                                                                                                                                                                                                                                                                                                                                                                                                                                                                                                                                                                                                                                                                                                                                                                                                                                                                                                                                                                                                                                                                                                                                                                                                                                                                                                                                                                                                                                                                                                                                                                                                                                                                                                                                                                                                                                                                                                                                                                                                                                                                                                                                                                                                                                                                                                                                                                                                                                                                                                                                                                                                                                                                        |
| LF | LF1223 | 1223 | CC1 | AGCGGG   | 1.34E-05   | 1.22E-05 | 4278  | 30 | 44640 | 118 | 0.00013889 | BS1EGCCR     |                                                                                                                                                                                                                                                                                                                                                                                                                                                                                                                                                                                                                                                                                                                                                                                                                                                                                                                                                                                                                                                                                                                                                                                                                                                                                                                                                                                                                                                                                                                                                                                                                                                                                                                                                                                                                                                                                                                                                                                                                                                                                                                                                                                                                                                                                                                                                                                                                                                                                                                                                                                                                                                                                                                                                                                                                                                                                                                                                                                                                                                                                                                                                                                                                                                                                                                                                                                                                                                                                                                                                                                                                                                                        |

|    |        |      |     |             |            |            |       |    |       |     |            |                    |                                                                                                                                                                                                                                                                                                                                                                                                                                                                                                                                                                                                                                                                                                                                                                                                                                                                                                                                                                                                                                                                                                                                                                                                                                                                                                                                                                                                                                                                                                                                                                                                                                                                                                                                                                                                                                                                                                                                                                                                                                                                                                                                                                                                                                                                                                                                                                                                                                                                                                                                                                                                                                                                                                                                                                                                                                                                                                                                                                                                                                                                                                                                                                                                                                                                                                                                                                                                                                                                                                                                                        |
|----|--------|------|-----|-------------|------------|------------|-------|----|-------|-----|------------|--------------------|--------------------------------------------------------------------------------------------------------------------------------------------------------------------------------------------------------------------------------------------------------------------------------------------------------------------------------------------------------------------------------------------------------------------------------------------------------------------------------------------------------------------------------------------------------------------------------------------------------------------------------------------------------------------------------------------------------------------------------------------------------------------------------------------------------------------------------------------------------------------------------------------------------------------------------------------------------------------------------------------------------------------------------------------------------------------------------------------------------------------------------------------------------------------------------------------------------------------------------------------------------------------------------------------------------------------------------------------------------------------------------------------------------------------------------------------------------------------------------------------------------------------------------------------------------------------------------------------------------------------------------------------------------------------------------------------------------------------------------------------------------------------------------------------------------------------------------------------------------------------------------------------------------------------------------------------------------------------------------------------------------------------------------------------------------------------------------------------------------------------------------------------------------------------------------------------------------------------------------------------------------------------------------------------------------------------------------------------------------------------------------------------------------------------------------------------------------------------------------------------------------------------------------------------------------------------------------------------------------------------------------------------------------------------------------------------------------------------------------------------------------------------------------------------------------------------------------------------------------------------------------------------------------------------------------------------------------------------------------------------------------------------------------------------------------------------------------------------------------------------------------------------------------------------------------------------------------------------------------------------------------------------------------------------------------------------------------------------------------------------------------------------------------------------------------------------------------------------------------------------------------------------------------------------------------|
| LF | LF1223 | 1223 | CC1 | CATGGGCGCGG | 8.98E-05   | 8.98E-05   | 3     | 2  | 48915 | 146 | 0.00013889 | RE1ASPHYA3         | RE1(putative repressor element) responsible for Pfr-directed repression of oat (A.s.) phyA3phytochrome gene; Also found in pea AS1(asparagine synthetase) gene (Ngai, Tsai, Coruzzi: Plant J 12:1021-1234 (1997)); Site I of rice (O.s.) PCNA (proliferating cell nuclear antigen) gene; Found at -201to -194; Resemble G-box; May contribute in part to transcriptional activation;<br>CGACG element found in the GC-rich regions of the rice (O.s.) Amy3D and Amy3E amylase genes, but not in Amy3E gene; May function as a coupling element for the G box element;<br>Core of GCC-box found in many pathogen-responsive genes such as PDF1.2, Thi2.1, and PR4; Has been shown to function as ethylene-responsive element; See S000036, S000232, S000332; Appears to play important roles in regulating jasmonate-responsive gene expression; Tomato Pti4 (ERF) regulates defence-related gene expression via GCC box and non-GCC box cis elements (Myb1(GTTAGTT) and G-box(CACGTG));<br>CGCG box recognized by AtSR1-6 (Arabidopsis thaliana signal-responsive genes); Multiple CGCG elements are found in promoters of many genes; Ca++/calmodulin binds to all AtSRs; V=A/C/G; B=G/T/C;<br>ABA responsive element (ABRE) of wheat Em and rice (O.s.) rab21genes; Proposed consensus sequence for the repeated motif (Em1a and Em1b) of wheat Em gene; S=C/G;<br>BS1(binding site 1) found in E. gunnii Cinnamoyl-CoA reductase (CCR) gene promoter; nuclear protein binding site; Required for vascular expression; RE1(putative repressor element) responsible for Pfr-directed repression of oat (A.s.) phyA3phytochrome gene; Also found in pea AS1(asparagine synthetase) gene (Ngai, Tsai, Coruzzi: Plant J 12:1021-1234 (1997)); Site I of rice (O.s.) PCNA (proliferating cell nuclear antigen) gene; Found at -201to -194; Resemble G-box; May contribute in part to transcriptional activation;<br>Octamer motif found in promoter of wheat (T.a.) histone genes H3and H4, and corn histone genes H3and H4; Arabidopsis histone H4; "histone-specific octamer"; About half of the Oct motifs are present together with another element, HexA, TCA or CCAAT-box, forming OCES (Oct-containing composite elements);<br>Core of GCC-box found in many pathogen-responsive genes such as PDF1.2, Thi2.1, and PR4; Has been shown to function as ethylene-responsive element; See S000036, S000232, S000332; Appears to play important roles in regulating jasmonate-responsive gene expression; Tomato Pti4 (ERF) regulates defence-related gene expression via GCC box and non-GCC box cis elements (Myb1(GTTAGTT) and G-box(CACGTG));<br>CGCG box recognized by AtSR1-6 (Arabidopsis thaliana signal-responsive genes); Multiple CGCG elements are found in promoters of many genes; Ca++/calmodulin binds to all AtSRs; V=A/C/G; B=G/T/C;<br>ABA responsive element (ABRE) of wheat Em and rice (O.s.) rab21genes; Proposed consensus sequence for the repeated motif (Em1a and Em1b) of wheat Em gene; S=C/G;<br>AGC box repeated twice in a 61bp enhancer element in tobacco (N.p.) class I beta-1,3-glucanase (GLB) gene; See S000036, S000089; "GCC-box"; Binding sequence of Arabidopsis AtERFs; AtERF1,2and 5 functioned as activators of GCC box-dependent transcription; AtERF3and 4 acted as repressors; AtERF proteins are stress signal-response factors; EREBP2binding site; Conserved in most PR-protein genes; Rice MAPK (BWMK1) phosphorylates OS EREBP1, which enhance DNA-binding activity of the factor to the GCC box; |
| LF | LF1223 | 1223 | CC1 | CCAGGTGG    | 2.55E-06   | 2.55E-06   | 594   | 11 | 48324 | 137 | 0.00013889 | SITEIOSPCNA        |                                                                                                                                                                                                                                                                                                                                                                                                                                                                                                                                                                                                                                                                                                                                                                                                                                                                                                                                                                                                                                                                                                                                                                                                                                                                                                                                                                                                                                                                                                                                                                                                                                                                                                                                                                                                                                                                                                                                                                                                                                                                                                                                                                                                                                                                                                                                                                                                                                                                                                                                                                                                                                                                                                                                                                                                                                                                                                                                                                                                                                                                                                                                                                                                                                                                                                                                                                                                                                                                                                                                                        |
| LF | LF1223 | 1223 | CC1 | CGACG       | 2.26E-05   | 0.00001689 | 12087 | 60 | 36831 | 88  | 0.00013889 | CGACGOSAMY3        |                                                                                                                                                                                                                                                                                                                                                                                                                                                                                                                                                                                                                                                                                                                                                                                                                                                                                                                                                                                                                                                                                                                                                                                                                                                                                                                                                                                                                                                                                                                                                                                                                                                                                                                                                                                                                                                                                                                                                                                                                                                                                                                                                                                                                                                                                                                                                                                                                                                                                                                                                                                                                                                                                                                                                                                                                                                                                                                                                                                                                                                                                                                                                                                                                                                                                                                                                                                                                                                                                                                                                        |
| LF | LF1223 | 1223 | CC1 | GCCGCC      | 1.61E-09   | 1.61E-09   | 4528  | 39 | 44390 | 109 | 0.00013889 | GCCCORE            |                                                                                                                                                                                                                                                                                                                                                                                                                                                                                                                                                                                                                                                                                                                                                                                                                                                                                                                                                                                                                                                                                                                                                                                                                                                                                                                                                                                                                                                                                                                                                                                                                                                                                                                                                                                                                                                                                                                                                                                                                                                                                                                                                                                                                                                                                                                                                                                                                                                                                                                                                                                                                                                                                                                                                                                                                                                                                                                                                                                                                                                                                                                                                                                                                                                                                                                                                                                                                                                                                                                                                        |
| LF | LF1223 | 1223 | CC1 | VCGCGB      | 4.64E-09   | 2.97E-09   | 11064 | 66 | 37854 | 82  | 0.00013889 | CGCGBOXAT          |                                                                                                                                                                                                                                                                                                                                                                                                                                                                                                                                                                                                                                                                                                                                                                                                                                                                                                                                                                                                                                                                                                                                                                                                                                                                                                                                                                                                                                                                                                                                                                                                                                                                                                                                                                                                                                                                                                                                                                                                                                                                                                                                                                                                                                                                                                                                                                                                                                                                                                                                                                                                                                                                                                                                                                                                                                                                                                                                                                                                                                                                                                                                                                                                                                                                                                                                                                                                                                                                                                                                                        |
| LF | LF1224 | 1224 | CC1 | ACGTSSSC    | 5.27E-06   | 5.27E-06   | 1975  | 21 | 46923 | 147 | 0.00013889 | ABREOSRAB21        |                                                                                                                                                                                                                                                                                                                                                                                                                                                                                                                                                                                                                                                                                                                                                                                                                                                                                                                                                                                                                                                                                                                                                                                                                                                                                                                                                                                                                                                                                                                                                                                                                                                                                                                                                                                                                                                                                                                                                                                                                                                                                                                                                                                                                                                                                                                                                                                                                                                                                                                                                                                                                                                                                                                                                                                                                                                                                                                                                                                                                                                                                                                                                                                                                                                                                                                                                                                                                                                                                                                                                        |
| LF | LF1224 | 1224 | CC1 | AGCGGG      | 8.83E-05   | 5.99E-05   | 4277  | 31 | 44621 | 137 | 0.00013889 | BS1EGCCR           |                                                                                                                                                                                                                                                                                                                                                                                                                                                                                                                                                                                                                                                                                                                                                                                                                                                                                                                                                                                                                                                                                                                                                                                                                                                                                                                                                                                                                                                                                                                                                                                                                                                                                                                                                                                                                                                                                                                                                                                                                                                                                                                                                                                                                                                                                                                                                                                                                                                                                                                                                                                                                                                                                                                                                                                                                                                                                                                                                                                                                                                                                                                                                                                                                                                                                                                                                                                                                                                                                                                                                        |
| LF | LF1224 | 1224 | CC1 | CATGGGCGCGG | 0.00011575 | 0.00011575 | 3     | 2  | 48895 | 166 | 0.00013889 | RE1ASPHYA3         |                                                                                                                                                                                                                                                                                                                                                                                                                                                                                                                                                                                                                                                                                                                                                                                                                                                                                                                                                                                                                                                                                                                                                                                                                                                                                                                                                                                                                                                                                                                                                                                                                                                                                                                                                                                                                                                                                                                                                                                                                                                                                                                                                                                                                                                                                                                                                                                                                                                                                                                                                                                                                                                                                                                                                                                                                                                                                                                                                                                                                                                                                                                                                                                                                                                                                                                                                                                                                                                                                                                                                        |
| LF | LF1224 | 1224 | CC1 | CCAGGTGG    | 8.64E-06   | 8.64E-06   | 594   | 11 | 48304 | 157 | 0.00013889 | SITEIOSPCNA        |                                                                                                                                                                                                                                                                                                                                                                                                                                                                                                                                                                                                                                                                                                                                                                                                                                                                                                                                                                                                                                                                                                                                                                                                                                                                                                                                                                                                                                                                                                                                                                                                                                                                                                                                                                                                                                                                                                                                                                                                                                                                                                                                                                                                                                                                                                                                                                                                                                                                                                                                                                                                                                                                                                                                                                                                                                                                                                                                                                                                                                                                                                                                                                                                                                                                                                                                                                                                                                                                                                                                                        |
| LF | LF1224 | 1224 | CC1 | CGCGGATC    | 4.04E-05   | 4.04E-05   | 175   | 6  | 48723 | 162 | 0.00013889 | OCTAMERMOTIFTAH3H4 |                                                                                                                                                                                                                                                                                                                                                                                                                                                                                                                                                                                                                                                                                                                                                                                                                                                                                                                                                                                                                                                                                                                                                                                                                                                                                                                                                                                                                                                                                                                                                                                                                                                                                                                                                                                                                                                                                                                                                                                                                                                                                                                                                                                                                                                                                                                                                                                                                                                                                                                                                                                                                                                                                                                                                                                                                                                                                                                                                                                                                                                                                                                                                                                                                                                                                                                                                                                                                                                                                                                                                        |
| LF | LF1224 | 1224 | CC1 | GCCGCC      | 7.09E-08   | 7.09E-08   | 4528  | 39 | 44370 | 129 | 0.00013889 | GCCCORE            |                                                                                                                                                                                                                                                                                                                                                                                                                                                                                                                                                                                                                                                                                                                                                                                                                                                                                                                                                                                                                                                                                                                                                                                                                                                                                                                                                                                                                                                                                                                                                                                                                                                                                                                                                                                                                                                                                                                                                                                                                                                                                                                                                                                                                                                                                                                                                                                                                                                                                                                                                                                                                                                                                                                                                                                                                                                                                                                                                                                                                                                                                                                                                                                                                                                                                                                                                                                                                                                                                                                                                        |
| LF | LF1224 | 1224 | CC1 | VCGCGB      | 1.61E-08   | 1.24E-08   | 11059 | 71 | 37839 | 97  | 0.00013889 | CGCGBOXAT          |                                                                                                                                                                                                                                                                                                                                                                                                                                                                                                                                                                                                                                                                                                                                                                                                                                                                                                                                                                                                                                                                                                                                                                                                                                                                                                                                                                                                                                                                                                                                                                                                                                                                                                                                                                                                                                                                                                                                                                                                                                                                                                                                                                                                                                                                                                                                                                                                                                                                                                                                                                                                                                                                                                                                                                                                                                                                                                                                                                                                                                                                                                                                                                                                                                                                                                                                                                                                                                                                                                                                                        |
| LF | LF1225 | 1225 | CC1 | ACGTSSSC    | 6.48E-07   | 6.48E-07   | 1973  | 23 | 46920 | 150 | 0.00013889 | ABREOSRAB21        |                                                                                                                                                                                                                                                                                                                                                                                                                                                                                                                                                                                                                                                                                                                                                                                                                                                                                                                                                                                                                                                                                                                                                                                                                                                                                                                                                                                                                                                                                                                                                                                                                                                                                                                                                                                                                                                                                                                                                                                                                                                                                                                                                                                                                                                                                                                                                                                                                                                                                                                                                                                                                                                                                                                                                                                                                                                                                                                                                                                                                                                                                                                                                                                                                                                                                                                                                                                                                                                                                                                                                        |
| LF | LF1225 | 1225 | CC1 | AGCCGCC     | 0.00002811 | 0.00002811 | 1495  | 17 | 47398 | 156 | 0.00013889 | AGCBOXNPGLB        |                                                                                                                                                                                                                                                                                                                                                                                                                                                                                                                                                                                                                                                                                                                                                                                                                                                                                                                                                                                                                                                                                                                                                                                                                                                                                                                                                                                                                                                                                                                                                                                                                                                                                                                                                                                                                                                                                                                                                                                                                                                                                                                                                                                                                                                                                                                                                                                                                                                                                                                                                                                                                                                                                                                                                                                                                                                                                                                                                                                                                                                                                                                                                                                                                                                                                                                                                                                                                                                                                                                                                        |

|    |        |      |     |             |            |            |       |    |       |     |            |                    |                                                                                                                                                                                                                                                                                                                                                                                                                                                                                                                                                                                                                                                                                                                                                                                                                                                                                                                                                                                                                                                                                                                                                                                                                                                                                                                                                                                                                                                                                                                                                                                                                                                                                                                                                                                                                                                                                                                                                                                                                                                                                                                                                                                                                                                                                                                                                                                                                                                  |
|----|--------|------|-----|-------------|------------|------------|-------|----|-------|-----|------------|--------------------|--------------------------------------------------------------------------------------------------------------------------------------------------------------------------------------------------------------------------------------------------------------------------------------------------------------------------------------------------------------------------------------------------------------------------------------------------------------------------------------------------------------------------------------------------------------------------------------------------------------------------------------------------------------------------------------------------------------------------------------------------------------------------------------------------------------------------------------------------------------------------------------------------------------------------------------------------------------------------------------------------------------------------------------------------------------------------------------------------------------------------------------------------------------------------------------------------------------------------------------------------------------------------------------------------------------------------------------------------------------------------------------------------------------------------------------------------------------------------------------------------------------------------------------------------------------------------------------------------------------------------------------------------------------------------------------------------------------------------------------------------------------------------------------------------------------------------------------------------------------------------------------------------------------------------------------------------------------------------------------------------------------------------------------------------------------------------------------------------------------------------------------------------------------------------------------------------------------------------------------------------------------------------------------------------------------------------------------------------------------------------------------------------------------------------------------------------|
| LF | LF1225 | 1225 | CC1 | AGCGGG      | 8.91E-06   | 6.76E-06   | 4274  | 34 | 44619 | 139 | 0.00013889 | BS1EGCCR           | BS1(binding site 1) found in E. gunnii Cinnamoyl-CoA reductase (CCR) gene promoter; nuclear protein binding site; Required for vascular expression; RE1(putative repressor element) responsible for Pfr-directed repression of oat (A.s.) phyA3phytochrome gene; Also found in pea AS1(asparagine synthetase) gene (Ngai, Tsai, Coruzzi: Plant J 12:1021-1234 (1997)); Site I of rice (O.s.) PCNA (proliferating cell nuclear antigen) gene; Found at -201to -194; Resemble G-box; May contribute in part to transcriptional activation; Box A; Consensus; One of three putative cis-acting elements (boxes P, A, and L) of phenylalanine ammonia-lyase (PAL; EC 4.3.1.5) genes in parsley (P.c.); "None of these elements (boxes P, A, and L) alone, or the promoter region containing all of them together, conferred elicitor or light responsiveness. These elements appear to be necessary but not sufficient for elicitor- or light-mediated PAL gene activation." (Logemann et al., 1995); See also S000136 (Box P), S000138 (Box L); CGACG element found in the GC-rich regions of the rice (O.s.) Amy3D and Amy3E amylase genes, but not in Amy3E gene; May function as a coupling element for the G box element; Octamer motif found in promoter of wheat (T.a.) histone genes H3and H4, and corn histone genes H3and H4; Arabidopsis histone H4; "histone-specific octamer"; About half of the Oct motifs are present together with another element, HexA, TCA or CCAAT-box, forming OCES (Oct-containing composite elements); Core of GCC-box found in many pathogen-responsive genes such as PDF1.2, Thi2.1, and PR4; Has been shown to function as ethylene-responsive element; See S000036, S000232, S000332; Appears to play important roles in regulating jasmonate-responsive gene expression; Tomato Pti4 (ERF) regulates defence-related gene expression via GCC box and non-GCC box cis elements (Myb1(GTTAGTT) and G-box(CACGTG)); Core motif of DRE/CRT (dehydration-responsive element/C-repeat) cis-acting element found in many genes in Arabidopsis and in rice; R=G/A; Os DREB1A bound to GCCGAC more preferentially than to ACCGAC whereas At DREB1A bound to both GCCGAC and ACCGAC efficiently; See S000402(ACCGAC); Maize ZmDREB1A bound to DRE (Qin et al. 2004); HaDREB2in Helianthus annuus (sunflower)(Diaz-Martin et al. 2005); HaDREB2physically interact with HaHSFA9 in vitro (Diaz-Martin et al. 2005); |
| LF | LF1225 | 1225 | CC1 | CATGGGCGCGG | 0.00012274 | 0.00012274 | 3     | 2  | 48890 | 171 | 0.00013889 | RE1ASPHYA3         |                                                                                                                                                                                                                                                                                                                                                                                                                                                                                                                                                                                                                                                                                                                                                                                                                                                                                                                                                                                                                                                                                                                                                                                                                                                                                                                                                                                                                                                                                                                                                                                                                                                                                                                                                                                                                                                                                                                                                                                                                                                                                                                                                                                                                                                                                                                                                                                                                                                  |
| LF | LF1225 | 1225 | CC1 | CCAGGTGG    | 1.86E-06   | 1.86E-06   | 593   | 12 | 48300 | 161 | 0.00013889 | SITEIOSPCNA        |                                                                                                                                                                                                                                                                                                                                                                                                                                                                                                                                                                                                                                                                                                                                                                                                                                                                                                                                                                                                                                                                                                                                                                                                                                                                                                                                                                                                                                                                                                                                                                                                                                                                                                                                                                                                                                                                                                                                                                                                                                                                                                                                                                                                                                                                                                                                                                                                                                                  |
| LF | LF1225 | 1225 | CC1 | CCGTCC      | 0.00015527 | 0.00013019 | 4740  | 33 | 44153 | 140 | 0.00013889 | PALBOXAPC          |                                                                                                                                                                                                                                                                                                                                                                                                                                                                                                                                                                                                                                                                                                                                                                                                                                                                                                                                                                                                                                                                                                                                                                                                                                                                                                                                                                                                                                                                                                                                                                                                                                                                                                                                                                                                                                                                                                                                                                                                                                                                                                                                                                                                                                                                                                                                                                                                                                                  |
| LF | LF1225 | 1225 | CC1 | CGACG       | 2.76E-05   | 1.65E-05   | 12079 | 68 | 36814 | 105 | 0.00013889 | CGACGOSAMY3        |                                                                                                                                                                                                                                                                                                                                                                                                                                                                                                                                                                                                                                                                                                                                                                                                                                                                                                                                                                                                                                                                                                                                                                                                                                                                                                                                                                                                                                                                                                                                                                                                                                                                                                                                                                                                                                                                                                                                                                                                                                                                                                                                                                                                                                                                                                                                                                                                                                                  |
| LF | LF1225 | 1225 | CC1 | CGCGGATC    | 4.75E-05   | 4.75E-05   | 175   | 6  | 48718 | 167 | 0.00013889 | OCTAMERMOTIFTAH3H4 |                                                                                                                                                                                                                                                                                                                                                                                                                                                                                                                                                                                                                                                                                                                                                                                                                                                                                                                                                                                                                                                                                                                                                                                                                                                                                                                                                                                                                                                                                                                                                                                                                                                                                                                                                                                                                                                                                                                                                                                                                                                                                                                                                                                                                                                                                                                                                                                                                                                  |
| LF | LF1225 | 1225 | CC1 | GCCGCC      | 5.63E-09   | 5.63E-09   | 4525  | 42 | 44368 | 131 | 0.00013889 | GCCCORE            |                                                                                                                                                                                                                                                                                                                                                                                                                                                                                                                                                                                                                                                                                                                                                                                                                                                                                                                                                                                                                                                                                                                                                                                                                                                                                                                                                                                                                                                                                                                                                                                                                                                                                                                                                                                                                                                                                                                                                                                                                                                                                                                                                                                                                                                                                                                                                                                                                                                  |
| LF | LF1225 | 1225 | CC1 | RCCGAC      | 0.0001612  | 9.46E-05   | 10276 | 58 | 38617 | 115 | 0.00013889 | DRECRTCOREAT       |                                                                                                                                                                                                                                                                                                                                                                                                                                                                                                                                                                                                                                                                                                                                                                                                                                                                                                                                                                                                                                                                                                                                                                                                                                                                                                                                                                                                                                                                                                                                                                                                                                                                                                                                                                                                                                                                                                                                                                                                                                                                                                                                                                                                                                                                                                                                                                                                                                                  |
| LF | LF1225 | 1225 | CC1 | TGGACGG     | 0.00010945 | 0.00010945 | 2011  | 19 | 46882 | 154 | 0.00013889 | CMSRE1IBSPOA       |                                                                                                                                                                                                                                                                                                                                                                                                                                                                                                                                                                                                                                                                                                                                                                                                                                                                                                                                                                                                                                                                                                                                                                                                                                                                                                                                                                                                                                                                                                                                                                                                                                                                                                                                                                                                                                                                                                                                                                                                                                                                                                                                                                                                                                                                                                                                                                                                                                                  |
| LF | LF1225 | 1225 | CC1 | VCGCGB      | 1.45E-08   | 8.47E-09   | 11057 | 73 | 37836 | 100 | 0.00013889 | CGCGBOXAT          |                                                                                                                                                                                                                                                                                                                                                                                                                                                                                                                                                                                                                                                                                                                                                                                                                                                                                                                                                                                                                                                                                                                                                                                                                                                                                                                                                                                                                                                                                                                                                                                                                                                                                                                                                                                                                                                                                                                                                                                                                                                                                                                                                                                                                                                                                                                                                                                                                                                  |
| LF | LF1226 | 1226 | CC1 | ACGTSSSC    | 5.32E-07   | 5.32E-07   | 1972  | 24 | 46910 | 160 | 0.00013889 | ABREOSRAB21        | AGC box repeated twice in a 61bp enhancer element in tobacco (N.p.) class I beta-1,3-glucanase (GLB) gene; See S000036, S000089; "GCC-box"; Binding sequence of Arabidopsis AtERFs; AtERF1,2and 5 functioned as activators of GCC box-dependent transcription; AtERF3and 4 acted as repressors; AtERF proteins are stress signal-response factors; EREBP2binding site; Conserved in most PR-protein genes; Rice MAPK (BWMK1) phosphorylates OS EREBP1, which enhance DNA-binding activity of the factor to the GCC box; BS1(binding site 1) found in E. gunnii Cinnamoyl-CoA reductase (CCR) gene promoter; nuclear protein binding site; Required for vascular expression;                                                                                                                                                                                                                                                                                                                                                                                                                                                                                                                                                                                                                                                                                                                                                                                                                                                                                                                                                                                                                                                                                                                                                                                                                                                                                                                                                                                                                                                                                                                                                                                                                                                                                                                                                                      |
| LF | LF1226 | 1226 | CC1 | AGCCGCC     | 1.76E-05   | 1.76E-05   | 1494  | 18 | 47388 | 166 | 0.00013889 | AGCBOXNPGLB        |                                                                                                                                                                                                                                                                                                                                                                                                                                                                                                                                                                                                                                                                                                                                                                                                                                                                                                                                                                                                                                                                                                                                                                                                                                                                                                                                                                                                                                                                                                                                                                                                                                                                                                                                                                                                                                                                                                                                                                                                                                                                                                                                                                                                                                                                                                                                                                                                                                                  |
| LF | LF1226 | 1226 | CC1 | AGCGGG      | 2.42E-07   | 1.98E-07   | 4269  | 39 | 44613 | 145 | 0.00013889 | BS1EGCCR           |                                                                                                                                                                                                                                                                                                                                                                                                                                                                                                                                                                                                                                                                                                                                                                                                                                                                                                                                                                                                                                                                                                                                                                                                                                                                                                                                                                                                                                                                                                                                                                                                                                                                                                                                                                                                                                                                                                                                                                                                                                                                                                                                                                                                                                                                                                                                                                                                                                                  |

|    |        |      |     |             |            |            |       |    |       |     |            |                    |                                                                                                                                                                                                                                                                                                                                                                                                                                                                                                                                                                                                                                                                                                                                                                                                                                                                                                                                                                                                                                                                                                                                                                                                                                                                                                                                                                                                                                                                                                                                                                                                                                                                                                                                                                                                                                                                                                                                                                                                                                                                                                                                                                                                                                                                                                                                                                                                                                                                                                                                                                                                                                                                                                                                                                                                                                                                                                                                                                                                                                                                                                                                                                                                                                                                                                                                                                                                                                                                                                                                                             |
|----|--------|------|-----|-------------|------------|------------|-------|----|-------|-----|------------|--------------------|-------------------------------------------------------------------------------------------------------------------------------------------------------------------------------------------------------------------------------------------------------------------------------------------------------------------------------------------------------------------------------------------------------------------------------------------------------------------------------------------------------------------------------------------------------------------------------------------------------------------------------------------------------------------------------------------------------------------------------------------------------------------------------------------------------------------------------------------------------------------------------------------------------------------------------------------------------------------------------------------------------------------------------------------------------------------------------------------------------------------------------------------------------------------------------------------------------------------------------------------------------------------------------------------------------------------------------------------------------------------------------------------------------------------------------------------------------------------------------------------------------------------------------------------------------------------------------------------------------------------------------------------------------------------------------------------------------------------------------------------------------------------------------------------------------------------------------------------------------------------------------------------------------------------------------------------------------------------------------------------------------------------------------------------------------------------------------------------------------------------------------------------------------------------------------------------------------------------------------------------------------------------------------------------------------------------------------------------------------------------------------------------------------------------------------------------------------------------------------------------------------------------------------------------------------------------------------------------------------------------------------------------------------------------------------------------------------------------------------------------------------------------------------------------------------------------------------------------------------------------------------------------------------------------------------------------------------------------------------------------------------------------------------------------------------------------------------------------------------------------------------------------------------------------------------------------------------------------------------------------------------------------------------------------------------------------------------------------------------------------------------------------------------------------------------------------------------------------------------------------------------------------------------------------------------------|
| LF | LF1226 | 1226 | CC1 | CATGGGCGCGG | 0.00013883 | 0.00013883 | 3     | 2  | 48879 | 182 | 0.00013889 | RE1ASPHYA3         | RE1(putative repressor element) responsible for Pfr-directed repression of oat (A.s.) phyA3phytochrome gene; Also found in pea AS1(asparagine synthetase) gene (Ngai, Tsai, Coruzzi: Plant J 12:1021-1234 (1997)); Site I of rice (O.s.) PCNA (proliferating cell nuclear antigen) gene; Found at -201to -194; Resemble G-box; May contribute in part to transcriptional activation; Box A; Consensus; One of three putative cis-acting elements (boxes P, A, and L) of phenylalanine ammonia-lyase (PAL; EC 4.3.1.5) genes in parsley (P.c.); "None of these elements (boxes P, A, and L) alone, or the promoter region containing all of them together, conferred elicitor or light responsiveness. These elements appear to be necessary but not sufficient for elicitor- or light-mediated PAL gene activation." (Logemann et al., 1995); See also S000136 (Box P), S000138 (Box L); CGACG element found in the GC-rich regions of the rice (O.s.) Amy3D and Amy3E amylase genes, but not in Amy3E gene; May function as a coupling element for the G box element; Octamer motif found in promoter of wheat (T.a.) histone genes H3and H4, and corn histone genes H3and H4; Arabidopsis histone H4; "histone-specific octamer"; About half of the Oct motifs are present together with another element, HexA, TCA or CCAAT-box, forming OCES (Oct-containing composite elements); Octamer motif found in histone-gene-specific consensus sequences; 200 base upstream from the initiation codon ATG; Exist in all of seven plant histone genes; Core of GCC-box found in many pathogen-responsive genes such as PDF1.2, Thi2.1, and PR4; Has been shown to function as ethylene-responsive element; See S000036, S000232, S000332; Appears to play important roles in regulating jasmonate-responsive gene expression; Tomato Pti4 (ERF) regulates defence-related gene expression via GCC box and non-GCC box cis elements (Myb1(GTTAGTT) and G-box(CACGTG)); Core motif of DRE/CRT (dehydration-responsive element/C-repeat) cis-acting element found in many genes in Arabidopsis and in rice; R=G/A; Os DREB1A bound to GCCGAC more preferentially than to ACCGAC whereas At DREB1A bound to both GCCGAC and ACCGAC efficiently; See S000402(ACCGAC); Maize ZmDREB1A bound to DRE (Qin et al. 2004); HaDREB2in Helianthus annuus (sunflower)(Diaz-Martin et al. 2005); HaDREB2physically interact with HaHSFA9 in vitro (Diaz-Martin et al. 2005); CMSRE-1(Carbohydrate Metabolite Signal Responsive Element 1) found in the promoter of sweet potato (I.b.) sporamin A gene; CGCG box recognized by AtSR1-6 (Arabidopsis thaliana signal-responsive genes); Multiple CGCG elements are found in promoters of many genes; Ca++/calmodulin binds to all AtSRs; V=A/C/G; B=G/T/C; ABA responsive element (ABRE) of wheat Em and rice (O.s.) rab21genes; Proposed consensus sequence for the repeated motif (Em1a and Em1b) of wheat Em gene; S=C/G; AGC box repeated twice in a 61bp enhancer element in tobacco (N.p.) class I beta-1,3-glucanase (GLB) gene; See S000036, S000089; "GCC-box"; Binding sequence of Arabidopsis AtERFs; AtERF1,2and 5 functioned as activators of GCC box-dependent transcription; AtERF3and 4 acted as repressors; AtERF proteins are stress signal-response factors; EREBP2binding site; Conserved in most PR-protein genes; Rice MAPK (BWMK1) phosphorylates OS EREBP1, which enhance DNA-binding activity of the factor to the GCC box; BS1(binding site 1) found in E. gunnii Cinnamoyl-CoA reductase (CCR) gene |
| LF | LF1226 | 1226 | CC1 | CCAGGTGG    | 3.54E-06   | 3.54E-06   | 593   | 12 | 48289 | 172 | 0.00013889 | SITEIOSPCNA        |                                                                                                                                                                                                                                                                                                                                                                                                                                                                                                                                                                                                                                                                                                                                                                                                                                                                                                                                                                                                                                                                                                                                                                                                                                                                                                                                                                                                                                                                                                                                                                                                                                                                                                                                                                                                                                                                                                                                                                                                                                                                                                                                                                                                                                                                                                                                                                                                                                                                                                                                                                                                                                                                                                                                                                                                                                                                                                                                                                                                                                                                                                                                                                                                                                                                                                                                                                                                                                                                                                                                                             |
| LF | LF1226 | 1226 | CC1 | CCGTCC      | 2.57E-05   | 0.00001601 | 4736  | 37 | 44146 | 147 | 0.00013889 | PALBOXAPC          |                                                                                                                                                                                                                                                                                                                                                                                                                                                                                                                                                                                                                                                                                                                                                                                                                                                                                                                                                                                                                                                                                                                                                                                                                                                                                                                                                                                                                                                                                                                                                                                                                                                                                                                                                                                                                                                                                                                                                                                                                                                                                                                                                                                                                                                                                                                                                                                                                                                                                                                                                                                                                                                                                                                                                                                                                                                                                                                                                                                                                                                                                                                                                                                                                                                                                                                                                                                                                                                                                                                                                             |
| LF | LF1226 | 1226 | CC1 | CGACG       | 0.00003409 | 0.00002253 | 12076 | 71 | 36806 | 113 | 0.00013889 | CGACGOSAMY3        |                                                                                                                                                                                                                                                                                                                                                                                                                                                                                                                                                                                                                                                                                                                                                                                                                                                                                                                                                                                                                                                                                                                                                                                                                                                                                                                                                                                                                                                                                                                                                                                                                                                                                                                                                                                                                                                                                                                                                                                                                                                                                                                                                                                                                                                                                                                                                                                                                                                                                                                                                                                                                                                                                                                                                                                                                                                                                                                                                                                                                                                                                                                                                                                                                                                                                                                                                                                                                                                                                                                                                             |
| LF | LF1226 | 1226 | CC1 | CGCGGATC    | 6.69E-05   | 6.69E-05   | 175   | 6  | 48707 | 178 | 0.00013889 | OCTAMERMOTIFTAH3H4 |                                                                                                                                                                                                                                                                                                                                                                                                                                                                                                                                                                                                                                                                                                                                                                                                                                                                                                                                                                                                                                                                                                                                                                                                                                                                                                                                                                                                                                                                                                                                                                                                                                                                                                                                                                                                                                                                                                                                                                                                                                                                                                                                                                                                                                                                                                                                                                                                                                                                                                                                                                                                                                                                                                                                                                                                                                                                                                                                                                                                                                                                                                                                                                                                                                                                                                                                                                                                                                                                                                                                                             |
| LF | LF1226 | 1226 | CC1 | CGCGGCAT    | 7.44E-05   | 7.44E-05   | 261   | 7  | 48621 | 177 | 0.00013889 | OCTAMOTIF2         |                                                                                                                                                                                                                                                                                                                                                                                                                                                                                                                                                                                                                                                                                                                                                                                                                                                                                                                                                                                                                                                                                                                                                                                                                                                                                                                                                                                                                                                                                                                                                                                                                                                                                                                                                                                                                                                                                                                                                                                                                                                                                                                                                                                                                                                                                                                                                                                                                                                                                                                                                                                                                                                                                                                                                                                                                                                                                                                                                                                                                                                                                                                                                                                                                                                                                                                                                                                                                                                                                                                                                             |
| LF | LF1226 | 1226 | CC1 | GCCGCC      | 3.89E-10   | 3.89E-10   | 4521  | 46 | 44361 | 138 | 0.00013889 | GCCCORE            |                                                                                                                                                                                                                                                                                                                                                                                                                                                                                                                                                                                                                                                                                                                                                                                                                                                                                                                                                                                                                                                                                                                                                                                                                                                                                                                                                                                                                                                                                                                                                                                                                                                                                                                                                                                                                                                                                                                                                                                                                                                                                                                                                                                                                                                                                                                                                                                                                                                                                                                                                                                                                                                                                                                                                                                                                                                                                                                                                                                                                                                                                                                                                                                                                                                                                                                                                                                                                                                                                                                                                             |
| LF | LF1226 | 1226 | CC1 | RCCGAC      | 1.68E-05   | 1.16E-05   | 10270 | 64 | 38612 | 120 | 0.00013889 | DRECRTCOREAT       |                                                                                                                                                                                                                                                                                                                                                                                                                                                                                                                                                                                                                                                                                                                                                                                                                                                                                                                                                                                                                                                                                                                                                                                                                                                                                                                                                                                                                                                                                                                                                                                                                                                                                                                                                                                                                                                                                                                                                                                                                                                                                                                                                                                                                                                                                                                                                                                                                                                                                                                                                                                                                                                                                                                                                                                                                                                                                                                                                                                                                                                                                                                                                                                                                                                                                                                                                                                                                                                                                                                                                             |
| LF | LF1226 | 1226 | CC1 | TGGACGG     | 2.76E-05   | 2.76E-05   | 2009  | 21 | 46873 | 163 | 0.00013889 | CMSRE1IBSPOA       |                                                                                                                                                                                                                                                                                                                                                                                                                                                                                                                                                                                                                                                                                                                                                                                                                                                                                                                                                                                                                                                                                                                                                                                                                                                                                                                                                                                                                                                                                                                                                                                                                                                                                                                                                                                                                                                                                                                                                                                                                                                                                                                                                                                                                                                                                                                                                                                                                                                                                                                                                                                                                                                                                                                                                                                                                                                                                                                                                                                                                                                                                                                                                                                                                                                                                                                                                                                                                                                                                                                                                             |
| LF | LF1226 | 1226 | CC1 | VCGCGB      | 1.60E-08   | 1.30E-08   | 11054 | 76 | 37828 | 108 | 0.00013889 | CGCGBOXAT          |                                                                                                                                                                                                                                                                                                                                                                                                                                                                                                                                                                                                                                                                                                                                                                                                                                                                                                                                                                                                                                                                                                                                                                                                                                                                                                                                                                                                                                                                                                                                                                                                                                                                                                                                                                                                                                                                                                                                                                                                                                                                                                                                                                                                                                                                                                                                                                                                                                                                                                                                                                                                                                                                                                                                                                                                                                                                                                                                                                                                                                                                                                                                                                                                                                                                                                                                                                                                                                                                                                                                                             |
| LF | LF1227 | 1227 | CC1 | ACGTSSSC    | 1.05E-06   | 1.05E-06   | 1972  | 24 | 46903 | 167 | 0.00013889 | ABREOSRAB21        |                                                                                                                                                                                                                                                                                                                                                                                                                                                                                                                                                                                                                                                                                                                                                                                                                                                                                                                                                                                                                                                                                                                                                                                                                                                                                                                                                                                                                                                                                                                                                                                                                                                                                                                                                                                                                                                                                                                                                                                                                                                                                                                                                                                                                                                                                                                                                                                                                                                                                                                                                                                                                                                                                                                                                                                                                                                                                                                                                                                                                                                                                                                                                                                                                                                                                                                                                                                                                                                                                                                                                             |
| LF | LF1227 | 1227 | CC1 | AGCCGCC     | 0.00002907 | 0.00002907 | 1494  | 18 | 47381 | 173 | 0.00013889 | AGCBOXNPGLB        |                                                                                                                                                                                                                                                                                                                                                                                                                                                                                                                                                                                                                                                                                                                                                                                                                                                                                                                                                                                                                                                                                                                                                                                                                                                                                                                                                                                                                                                                                                                                                                                                                                                                                                                                                                                                                                                                                                                                                                                                                                                                                                                                                                                                                                                                                                                                                                                                                                                                                                                                                                                                                                                                                                                                                                                                                                                                                                                                                                                                                                                                                                                                                                                                                                                                                                                                                                                                                                                                                                                                                             |
| LF | LF1227 | 1227 | CC1 | AGCGGG      | 2.18E-07   | 1.95E-07   | 4268  | 40 | 44607 | 151 | 0.00013889 | BS1EGCCR           |                                                                                                                                                                                                                                                                                                                                                                                                                                                                                                                                                                                                                                                                                                                                                                                                                                                                                                                                                                                                                                                                                                                                                                                                                                                                                                                                                                                                                                                                                                                                                                                                                                                                                                                                                                                                                                                                                                                                                                                                                                                                                                                                                                                                                                                                                                                                                                                                                                                                                                                                                                                                                                                                                                                                                                                                                                                                                                                                                                                                                                                                                                                                                                                                                                                                                                                                                                                                                                                                                                                                                             |

|    |        |      |     |          |            |            |       |    |       |     |            |                    |                                                                                                                                                                                                                                                                                                                                                                                                                                                                                                     |
|----|--------|------|-----|----------|------------|------------|-------|----|-------|-----|------------|--------------------|-----------------------------------------------------------------------------------------------------------------------------------------------------------------------------------------------------------------------------------------------------------------------------------------------------------------------------------------------------------------------------------------------------------------------------------------------------------------------------------------------------|
| LF | LF1227 | 1227 | CC1 | CCAGGTGG | 5.19E-06   | 5.19E-06   | 593   | 12 | 48282 | 179 | 0.00013889 | SITEIOSPCNA        | promoter; nuclear protein binding site; Required for vascular expression; Site I of rice (O.s.) PCNA (proliferating cell nuclear antigen) gene; Found at -201to -194; Resemble G-box; May contribute in part to transcriptional activation;                                                                                                                                                                                                                                                         |
| LF | LF1227 | 1227 | CC1 | CCGAC    | 0.00012699 | 7.72E-05   | 16899 | 92 | 31976 | 99  | 0.00013889 | LTRECOREATCOR15    | Core of low temperature responsive element (LTRE) of cor15a gene in Arabidopsis (A.t.); A portion of repeat-C (C-repeat), TGGCCGAC, which is repeated twice in cor15a promoter (Baker et al., 1994); ABA responsiveness; Involved in cold induction of BN115 gene from winter Brassica napus; LTRE; See S000157, S000152; Light signaling mediated by phytochrome is necessary for cold- or drought- induced gene expression through the C/DRE in Arabidopsis; See S000152;                         |
| LF | LF1227 | 1227 | CC1 | CCGTCC   | 0.00011379 | 0.00008562 | 4737  | 36 | 44138 | 155 | 0.00013889 | PALBOXAPC          | Box A; Consensus; One of three putative cis-acting elements (boxes P, A, and L) of phenylalanine ammonia-lyase (PAL; EC 4.3.1.5) genes in parsley (P.c.); "None of these elements (boxes P, A, and L) alone, or the promoter region containing all of them together, conferred elicitor or light responsiveness. These elements appear to be necessary but not sufficient for elicitor- or light-mediated PAL gene activation." (Logemann et al., 1995); See also S000136 (Box P), S000138 (Box L); |
| LF | LF1227 | 1227 | CC1 | CGACG    | 0.00014091 | 9.11E-05   | 12076 | 71 | 36799 | 120 | 0.00013889 | CGACGOSAMY3        | CGACG element found in the GC-rich regions of the rice (O.s.) Amy3D and Amy3E amylase genes, but not in Amy3E gene; May function as a coupling element for the G box element;                                                                                                                                                                                                                                                                                                                       |
| LF | LF1227 | 1227 | CC1 | CGCGGATC | 0.00008216 | 0.00008216 | 175   | 6  | 48700 | 185 | 0.00013889 | OCTAMERMOTIFTAH3H4 | Octamer motif found in promoter of wheat (T.a.) histone genes H3and H4, and corn histone genes H3and H4; Arabidopsis histone H4; "histone-specific octamer"; About half of the Oct motifs are present together with another element, HexA, TCA or CCAAT-box, forming OCES (Oct-containing composite elements);                                                                                                                                                                                      |
| LF | LF1227 | 1227 | CC1 | CGCGGCAT | 9.40E-05   | 9.40E-05   | 261   | 7  | 48614 | 184 | 0.00013889 | OCTAMOTIF2         | Octamer motif found in histone-gene-specific consensus sequences; 200 base upstream from the initiation codon ATG; Exist in all of seven plant histone genes;                                                                                                                                                                                                                                                                                                                                       |
| LF | LF1227 | 1227 | CC1 | GCCGCC   | 4.49E-09   | 4.49E-09   | 4522  | 45 | 44353 | 146 | 0.00013889 | GCCCORE            | Core of GCC-box found in many pathogen-responsive genes such as PDF1.2, Thi2.1, and PR4; Has been shown to function as ethylene-responsive element; See S000036, S000232, S000332; Appears to play important roles in regulating jasmonate-responsive gene expression; Tomato Pti4 (ERF) regulates defence-related gene expression via GCC box and non-GCC box cis elements (Myb1(GTTAGTT) and G-box(CACGTG));                                                                                      |
| LF | LF1227 | 1227 | CC1 | RCCGAC   | 3.58E-05   | 2.21E-05   | 10269 | 65 | 38606 | 126 | 0.00013889 | DRECRTCOREAT       | Core motif of DRE/CRT (dehydration-responsive element/C-repeat) cis-acting element found in many genes in Arabidopsis and in rice; R=G/A; Os DREB1A bound to GCCGAC more preferentially than to ACCGAC whereas At DREB1A bound to both GCCGAC and ACCGAC efficiently; See S000402(ACCGAC); Maize ZmDREB1A bound to DRE (Qin et al. 2004); HaDREB2in Helianthus annuus (sunflower)(Diaz-Martin et al. 2005); HaDREB2physically interact with HaHSFA9 in vitro (Diaz-Martin et al. 2005);             |
| LF | LF1227 | 1227 | CC1 | VCGCGB   | 3.42E-07   | 1.93E-07   | 11055 | 75 | 37820 | 116 | 0.00013889 | CGCGBOXAT          | CGCG box recognized by AtSR1-6 (Arabidopsis thaliana signal-responsive genes); Multiple CGCG elements are found in promoters of many genes; Ca++/calmodulin binds to all AtSRs; V=A/C/G; B=G/T/C;                                                                                                                                                                                                                                                                                                   |
| LF | LF1228 | 1228 | CC1 | ACGTSSSC | 1.92E-06   | 1.92E-06   | 1973  | 23 | 46909 | 161 | 0.00013889 | ABREOSRAB21        | ABA responsive element (ABRE) of wheat Em and rice (O.s.) rab21genes; Proposed consensus sequence for the repeated motif (Em1a and Em1b) of wheat Em gene; S=C/G;                                                                                                                                                                                                                                                                                                                                   |
| LF | LF1228 | 1228 | CC1 | AGCCGCC  | 1.76E-05   | 1.76E-05   | 1494  | 18 | 47388 | 166 | 0.00013889 | AGCBOXNPGLB        | AGC box repeated twice in a 61bp enhancer element in tobacco (N.p.) class I beta-1,3-glucanase (GLB) gene; See S000036, S000089; "GCC-box"; Binding sequence of Arabidopsis AtERFs; AtERF1,2and 5 functioned as activators of GCC box-dependent transcription; AtERF3and 4 acted as repressors; AtERF proteins are stress signal-response factors; EREBP2binding site; Conserved in                                                                                                                 |

|    |        |      |     |             |            |            |       |    |       |     |            |                    |                                                                                                                                                                                                                                                                                                                                                                                                                                                                                                                                                                                                                                                                                                                                                                                                                                                                                                                                                                                                                                                                                                                                                                                                                                                                                                                                                                                                                                                                                                                                                                                                                                                                                                                                                                                                                                                                                                                                                                                                                                                                                                                                                                                                                                                                                                                                                                                                                                                                                                                                                                                                                                                                                                                                                                                                                                                                                                                                                                                                                                                                                                                                                                                                                                                                                                                                                                                                                                                                                                                                                                                      |
|----|--------|------|-----|-------------|------------|------------|-------|----|-------|-----|------------|--------------------|--------------------------------------------------------------------------------------------------------------------------------------------------------------------------------------------------------------------------------------------------------------------------------------------------------------------------------------------------------------------------------------------------------------------------------------------------------------------------------------------------------------------------------------------------------------------------------------------------------------------------------------------------------------------------------------------------------------------------------------------------------------------------------------------------------------------------------------------------------------------------------------------------------------------------------------------------------------------------------------------------------------------------------------------------------------------------------------------------------------------------------------------------------------------------------------------------------------------------------------------------------------------------------------------------------------------------------------------------------------------------------------------------------------------------------------------------------------------------------------------------------------------------------------------------------------------------------------------------------------------------------------------------------------------------------------------------------------------------------------------------------------------------------------------------------------------------------------------------------------------------------------------------------------------------------------------------------------------------------------------------------------------------------------------------------------------------------------------------------------------------------------------------------------------------------------------------------------------------------------------------------------------------------------------------------------------------------------------------------------------------------------------------------------------------------------------------------------------------------------------------------------------------------------------------------------------------------------------------------------------------------------------------------------------------------------------------------------------------------------------------------------------------------------------------------------------------------------------------------------------------------------------------------------------------------------------------------------------------------------------------------------------------------------------------------------------------------------------------------------------------------------------------------------------------------------------------------------------------------------------------------------------------------------------------------------------------------------------------------------------------------------------------------------------------------------------------------------------------------------------------------------------------------------------------------------------------------------|
| LF | LF1228 | 1228 | CC1 | AGCGGG      | 1.11E-07   | 6.76E-08   | 4268  | 40 | 44614 | 144 | 0.00013889 | BS1EGCCR           | <p>most PR-protein genes; Rice MAPK (BWMK1) phosphorylates OS EREBP1, which enhance DNA-binding activity of the factor to the GCC box; BS1(binding site 1) found in E. gunnii Cinnamoyl-CoA reductase (CCR) gene promoter; nuclear protein binding site; Required for vascular expression; RE1(putative repressor element) responsible for Pfr-directed repression of oat (A.s.) phyA3phytochrome gene; Also found in pea AS1(asparagine synthetase) gene (Ngai, Tsai, Coruzzi: Plant J 12:1021-1234 (1997)); Site I of rice (O.s.) PCNA (proliferating cell nuclear antigen) gene; Found at -201to -194; Resemble G-box; May contribute in part to transcriptional activation; Box A; Consensus; One of three putative cis-acting elements (boxes P, A, and L) of phenylalanine ammonia-lyase (PAL; EC 4.3.1.5) genes in parsley (P.c.); "None of these elements (boxes P, A, and L) alone, or the promoter region containing all of them together, conferred elicitor or light responsiveness. These elements appear to be necessary but not sufficient for elicitor- or light-mediated PAL gene activation." (Logemann et al., 1995); See also S000136 (Box P), S000138 (Box L); CGACG element found in the GC-rich regions of the rice (O.s.) Amy3D and Amy3E amylase genes, but not in Amy3E gene; May function as a coupling element for the G box element; Octamer motif found in promoter of wheat (T.a.) histone genes H3and H4, and corn histone genes H3and H4; Arabidopsis histone H4; "histone-specific octamer"; About half of the Oct motifs are present together with another element, HexA, TCA or CCAAT-box, forming OCES (Oct-containing composite elements); Octamer motif found in histone-gene-specific consensus sequences; 200 base upstream from the initiation codon ATG; Exist in all of seven plant histone genes; Core of GCC-box found in many pathogen-responsive genes such as PDF1.2, Thi2.1, and PR4; Has been shown to function as ethylene-responsive element; See S000036, S000232, S000332; Appears to play important roles in regulating jasmonate-responsive gene expression; Tomato Pti4 (ERF) regulates defence-related gene expression via GCC box and non-GCC box cis elements (Myb1(GTTAGTT) and G-box(CACGTG)); Core motif of DRE/CRT (dehydration-responsive element/C-repeat) cis-acting element found in many genes in Arabidopsis and in rice; R=G/A; Os DREB1A bound to GCCGAC more preferentially than to ACCGAC whereas At DREB1A bound to both GCCGAC and ACCGAC efficiently; See S000402(ACCGAC); Maize ZmDREB1A bound to DRE (Qin et al. 2004); HaDREB2in Helianthus annuus (sunflower)(Diaz-Martin et al. 2005); HaDREB2physically interact with HaHSFA9 in vitro (Diaz-Martin et al. 2005); CGCG box recognized by AtSR1-6 (Arabidopsis thaliana signal-responsive genes); Multiple CGCG elements are found in promoters of many genes; Ca++/calmodulin binds to all AtSRs; V=A/C/G; B=G/T/C; ABA responsive element (ABRE) of wheat Em and rice (O.s.) rab21genes; Proposed consensus sequence for the repeated motif (Em1a and Em1b) of wheat Em gene; S=C/G; AGC box repeated twice in a 61bp enhancer element in tobacco (N.p.) class I beta-1,3-glucanase (GLB) gene; See S000036, S000089; "GCC-box"; Binding sequence of Arabidopsis AtERFs; AtERF1,2and 5 functioned as activators of GCC box-dependent transcription; AtERF3and 4 acted as repressors; AtERF proteins are stress signal-response factors; EREBP2binding site; Conserved in most PR-protein genes; Rice MAPK (BWMK1) phosphorylates OS EREBP1,</p> |
| LF | LF1228 | 1228 | CC1 | CATGGGCGCGG | 0.00013883 | 0.00013883 | 3     | 2  | 48879 | 182 | 0.00013889 | RE1ASPHYA3         |                                                                                                                                                                                                                                                                                                                                                                                                                                                                                                                                                                                                                                                                                                                                                                                                                                                                                                                                                                                                                                                                                                                                                                                                                                                                                                                                                                                                                                                                                                                                                                                                                                                                                                                                                                                                                                                                                                                                                                                                                                                                                                                                                                                                                                                                                                                                                                                                                                                                                                                                                                                                                                                                                                                                                                                                                                                                                                                                                                                                                                                                                                                                                                                                                                                                                                                                                                                                                                                                                                                                                                                      |
| LF | LF1228 | 1228 | CC1 | CCAGGTGG    | 3.54E-06   | 3.54E-06   | 593   | 12 | 48289 | 172 | 0.00013889 | SITEIOSPCNA        |                                                                                                                                                                                                                                                                                                                                                                                                                                                                                                                                                                                                                                                                                                                                                                                                                                                                                                                                                                                                                                                                                                                                                                                                                                                                                                                                                                                                                                                                                                                                                                                                                                                                                                                                                                                                                                                                                                                                                                                                                                                                                                                                                                                                                                                                                                                                                                                                                                                                                                                                                                                                                                                                                                                                                                                                                                                                                                                                                                                                                                                                                                                                                                                                                                                                                                                                                                                                                                                                                                                                                                                      |
| LF | LF1228 | 1228 | CC1 | CCGTCC      | 0.00013814 | 0.000088   | 4738  | 35 | 44144 | 149 | 0.00013889 | PALBOXAPC          |                                                                                                                                                                                                                                                                                                                                                                                                                                                                                                                                                                                                                                                                                                                                                                                                                                                                                                                                                                                                                                                                                                                                                                                                                                                                                                                                                                                                                                                                                                                                                                                                                                                                                                                                                                                                                                                                                                                                                                                                                                                                                                                                                                                                                                                                                                                                                                                                                                                                                                                                                                                                                                                                                                                                                                                                                                                                                                                                                                                                                                                                                                                                                                                                                                                                                                                                                                                                                                                                                                                                                                                      |
| LF | LF1228 | 1228 | CC1 | CGACG       | 0.00014676 | 0.0000831  | 12078 | 69 | 36804 | 115 | 0.00013889 | CGACGOSAMY3        |                                                                                                                                                                                                                                                                                                                                                                                                                                                                                                                                                                                                                                                                                                                                                                                                                                                                                                                                                                                                                                                                                                                                                                                                                                                                                                                                                                                                                                                                                                                                                                                                                                                                                                                                                                                                                                                                                                                                                                                                                                                                                                                                                                                                                                                                                                                                                                                                                                                                                                                                                                                                                                                                                                                                                                                                                                                                                                                                                                                                                                                                                                                                                                                                                                                                                                                                                                                                                                                                                                                                                                                      |
| LF | LF1228 | 1228 | CC1 | CGCGGATC    | 6.69E-05   | 6.69E-05   | 175   | 6  | 48707 | 178 | 0.00013889 | OCTAMERMOTIFTAH3H4 |                                                                                                                                                                                                                                                                                                                                                                                                                                                                                                                                                                                                                                                                                                                                                                                                                                                                                                                                                                                                                                                                                                                                                                                                                                                                                                                                                                                                                                                                                                                                                                                                                                                                                                                                                                                                                                                                                                                                                                                                                                                                                                                                                                                                                                                                                                                                                                                                                                                                                                                                                                                                                                                                                                                                                                                                                                                                                                                                                                                                                                                                                                                                                                                                                                                                                                                                                                                                                                                                                                                                                                                      |
| LF | LF1228 | 1228 | CC1 | CGCGGCAT    | 7.44E-05   | 7.44E-05   | 261   | 7  | 48621 | 177 | 0.00013889 | OCTAMOTIF2         |                                                                                                                                                                                                                                                                                                                                                                                                                                                                                                                                                                                                                                                                                                                                                                                                                                                                                                                                                                                                                                                                                                                                                                                                                                                                                                                                                                                                                                                                                                                                                                                                                                                                                                                                                                                                                                                                                                                                                                                                                                                                                                                                                                                                                                                                                                                                                                                                                                                                                                                                                                                                                                                                                                                                                                                                                                                                                                                                                                                                                                                                                                                                                                                                                                                                                                                                                                                                                                                                                                                                                                                      |
| LF | LF1228 | 1228 | CC1 | GCCGCC      | 4.08E-09   | 4.08E-09   | 4523  | 44 | 44359 | 140 | 0.00013889 | GCCCORE            |                                                                                                                                                                                                                                                                                                                                                                                                                                                                                                                                                                                                                                                                                                                                                                                                                                                                                                                                                                                                                                                                                                                                                                                                                                                                                                                                                                                                                                                                                                                                                                                                                                                                                                                                                                                                                                                                                                                                                                                                                                                                                                                                                                                                                                                                                                                                                                                                                                                                                                                                                                                                                                                                                                                                                                                                                                                                                                                                                                                                                                                                                                                                                                                                                                                                                                                                                                                                                                                                                                                                                                                      |
| LF | LF1228 | 1228 | CC1 | RCCGAC      | 0.00012768 | 9.12E-05   | 10273 | 61 | 38609 | 123 | 0.00013889 | DRECRTCOREAT       |                                                                                                                                                                                                                                                                                                                                                                                                                                                                                                                                                                                                                                                                                                                                                                                                                                                                                                                                                                                                                                                                                                                                                                                                                                                                                                                                                                                                                                                                                                                                                                                                                                                                                                                                                                                                                                                                                                                                                                                                                                                                                                                                                                                                                                                                                                                                                                                                                                                                                                                                                                                                                                                                                                                                                                                                                                                                                                                                                                                                                                                                                                                                                                                                                                                                                                                                                                                                                                                                                                                                                                                      |
| LF | LF1228 | 1228 | CC1 | VCGCGB      | 1.36E-06   | 8.71E-07   | 11059 | 71 | 37823 | 113 | 0.00013889 | CGCGBOXAT          |                                                                                                                                                                                                                                                                                                                                                                                                                                                                                                                                                                                                                                                                                                                                                                                                                                                                                                                                                                                                                                                                                                                                                                                                                                                                                                                                                                                                                                                                                                                                                                                                                                                                                                                                                                                                                                                                                                                                                                                                                                                                                                                                                                                                                                                                                                                                                                                                                                                                                                                                                                                                                                                                                                                                                                                                                                                                                                                                                                                                                                                                                                                                                                                                                                                                                                                                                                                                                                                                                                                                                                                      |
| LF | LF1229 | 1229 | CC1 | ACGTSSSC    | 3.96E-06   | 3.96E-06   | 1975  | 21 | 46926 | 144 | 0.00013889 | ABREOSRAB21        | <p>AGC box repeated twice in a 61bp enhancer element in tobacco (N.p.) class I beta-1,3-glucanase (GLB) gene; See S000036, S000089; "GCC-box"; Binding sequence of Arabidopsis AtERFs; AtERF1,2and 5 functioned as activators of GCC box-dependent transcription; AtERF3and 4 acted as repressors; AtERF proteins are stress signal-response factors; EREBP2binding site; Conserved in most PR-protein genes; Rice MAPK (BWMK1) phosphorylates OS EREBP1,</p>                                                                                                                                                                                                                                                                                                                                                                                                                                                                                                                                                                                                                                                                                                                                                                                                                                                                                                                                                                                                                                                                                                                                                                                                                                                                                                                                                                                                                                                                                                                                                                                                                                                                                                                                                                                                                                                                                                                                                                                                                                                                                                                                                                                                                                                                                                                                                                                                                                                                                                                                                                                                                                                                                                                                                                                                                                                                                                                                                                                                                                                                                                                        |
| LF | LF1229 | 1229 | CC1 | AGCCGCC     | 0.00001519 | 0.00001519 | 1495  | 17 | 47406 | 148 | 0.00013889 | AGCBOXNPGLB        |                                                                                                                                                                                                                                                                                                                                                                                                                                                                                                                                                                                                                                                                                                                                                                                                                                                                                                                                                                                                                                                                                                                                                                                                                                                                                                                                                                                                                                                                                                                                                                                                                                                                                                                                                                                                                                                                                                                                                                                                                                                                                                                                                                                                                                                                                                                                                                                                                                                                                                                                                                                                                                                                                                                                                                                                                                                                                                                                                                                                                                                                                                                                                                                                                                                                                                                                                                                                                                                                                                                                                                                      |

|    |        |      |     |             |            |            |       |    |       |     |            |                    |                                                                                                                                                                                                                                                                                                                                                                                                                                                                                                                                                                                                                                                                                                                                                                                                                                                                                                                                                                                                                                                                                                                                                                                                                                                                                                                                                                                                                                                                                                                                                                                                                                                                                                                                                                                                                                                                                                                                                                                                                                                                                                                                                                                                                                                                                                                                                                                                                                                                                                                                                                                                                                                                                                                                                                                                                                                                                                                                                                                                                                                                                                                                                                                                                                                                                                                                                                                                                                                                                                                                                                                  |
|----|--------|------|-----|-------------|------------|------------|-------|----|-------|-----|------------|--------------------|----------------------------------------------------------------------------------------------------------------------------------------------------------------------------------------------------------------------------------------------------------------------------------------------------------------------------------------------------------------------------------------------------------------------------------------------------------------------------------------------------------------------------------------------------------------------------------------------------------------------------------------------------------------------------------------------------------------------------------------------------------------------------------------------------------------------------------------------------------------------------------------------------------------------------------------------------------------------------------------------------------------------------------------------------------------------------------------------------------------------------------------------------------------------------------------------------------------------------------------------------------------------------------------------------------------------------------------------------------------------------------------------------------------------------------------------------------------------------------------------------------------------------------------------------------------------------------------------------------------------------------------------------------------------------------------------------------------------------------------------------------------------------------------------------------------------------------------------------------------------------------------------------------------------------------------------------------------------------------------------------------------------------------------------------------------------------------------------------------------------------------------------------------------------------------------------------------------------------------------------------------------------------------------------------------------------------------------------------------------------------------------------------------------------------------------------------------------------------------------------------------------------------------------------------------------------------------------------------------------------------------------------------------------------------------------------------------------------------------------------------------------------------------------------------------------------------------------------------------------------------------------------------------------------------------------------------------------------------------------------------------------------------------------------------------------------------------------------------------------------------------------------------------------------------------------------------------------------------------------------------------------------------------------------------------------------------------------------------------------------------------------------------------------------------------------------------------------------------------------------------------------------------------------------------------------------------------|
| LF | LF1229 | 1229 | CC1 | AGCGGG      | 2.52E-06   | 2.27E-06   | 4274  | 34 | 44627 | 131 | 0.00013889 | BS1EGCCR           | <p>which enhance DNA-binding activity of the factor to the GCC box;<br/>BS1(binding site 1) found in <i>E. gunnii</i> Cinnamoyl-CoA reductase (CCR) gene promoter; nuclear protein binding site; Required for vascular expression; RE1(putative repressor element) responsible for Pfr-directed repression of oat (A.s.) phyA3phytochrome gene; Also found in pea AS1(asparagine synthetase) gene (Ngai, Tsai, Coruzzi: Plant J 12:1021-1234 (1997)); Site I of rice (O.s.) PCNA (proliferating cell nuclear antigen) gene; Found at -201to -194; Resemble G-box; May contribute in part to transcriptional activation;<br/>Octamer motif found in promoter of wheat (T.a.) histone genes H3and H4, and corn histone genes H3and H4; Arabidopsis histone H4; "histone-specific octamer"; About half of the Oct motifs are present together with another element, HexA, TCA or CCAAT-box, forming OCES (Oct-containing composite elements);<br/>Core of GCC-box found in many pathogen-responsive genes such as PDF1.2, Thi2.1, and PR4; Has been shown to function as ethylene-responsive element; See S000036, S000232, S000332; Appears to play important roles in regulating jasmonate-responsive gene expression; Tomato Pti4 (ERF) regulates defence-related gene expression via GCC box and non-GCC box cis elements (Myb1(GTTAGTT) and G-box(CACGTG));<br/>Core motif of DRE/CRT (dehydration-responsive element/C-repeat) cis-acting element found in many genes in Arabidopsis and in rice; R=G/A; Os DREB1A bound to GCCGAC more preferentially than to ACCGAC whereas At DREB1A bound to both GCCGAC and ACCGAC efficiently; See S000402(ACCGAC); Maize ZmDREB1A bound to DRE (Qin et al. 2004); HaDREB2in <i>Helianthus annuus</i> (sunflower)(Diaz-Martin et al. 2005); HaDREB2physically interact with HaHSFA9 in vitro (Diaz-Martin et al. 2005);<br/>CGCG box recognized by AtSR1-6 (<i>Arabidopsis thaliana</i> signal-responsive genes); Multiple CGCG elements are found in promoters of many genes; Ca++/calmodulin binds to all AtSRs; V=A/C/G; B=G/T/C;<br/>Prolamine box found in the rice (O.s.) GluB-1gene promoter; Involved in quantitative regulation of the GluB-1gene; See S000276, S000277, S000278 (for elements in GluB-1); See S000001, S000091, S000265, S000341(for Prolamin box);<br/>ABA responsive element (ABRE) of wheat Em and rice (O.s.) rab21genes; Proposed consensus sequence for the repeated motif (Em1a and Em1b) of wheat Em gene; S=C/G;<br/>AGC box repeated twice in a 61bp enhancer element in tobacco (N.p.) class I beta-1,3-glucanase (GLB) gene; See S000036, S000089; "GCC-box"; Binding sequence of Arabidopsis AtERFs; AtERF1,2and 5 functioned as activators of GCC box-dependent transcription; AtERF3and 4 acted as repressors; AtERF proteins are stress signal-response factors; EREBP2binding site; Conserved in most PR-protein genes; Rice MAPK (BWMK1) phosphorylates OS EREBP1, which enhance DNA-binding activity of the factor to the GCC box;<br/>BS1(binding site 1) found in <i>E. gunnii</i> Cinnamoyl-CoA reductase (CCR) gene promoter; nuclear protein binding site; Required for vascular expression; RE1(putative repressor element) responsible for Pfr-directed repression of oat (A.s.) phyA3phytochrome gene; Also found in pea AS1(asparagine synthetase) gene (Ngai, Tsai, Coruzzi: Plant J 12:1021-1234 (1997)); Site I of rice (O.s.) PCNA (proliferating cell nuclear antigen) gene; Found at -201to -194; Resemble G-box; May contribute in part to transcriptional activation;</p> |
| LF | LF1229 | 1229 | CC1 | CATGGGCGCGG | 0.00011166 | 0.00011166 | 3     | 2  | 48898 | 163 | 0.00013889 | RE1ASPHYA3         |                                                                                                                                                                                                                                                                                                                                                                                                                                                                                                                                                                                                                                                                                                                                                                                                                                                                                                                                                                                                                                                                                                                                                                                                                                                                                                                                                                                                                                                                                                                                                                                                                                                                                                                                                                                                                                                                                                                                                                                                                                                                                                                                                                                                                                                                                                                                                                                                                                                                                                                                                                                                                                                                                                                                                                                                                                                                                                                                                                                                                                                                                                                                                                                                                                                                                                                                                                                                                                                                                                                                                                                  |
| LF | LF1229 | 1229 | CC1 | CCAGGTGG    | 7.28E-06   | 7.28E-06   | 594   | 11 | 48307 | 154 | 0.00013889 | SITEIOSPCNA        |                                                                                                                                                                                                                                                                                                                                                                                                                                                                                                                                                                                                                                                                                                                                                                                                                                                                                                                                                                                                                                                                                                                                                                                                                                                                                                                                                                                                                                                                                                                                                                                                                                                                                                                                                                                                                                                                                                                                                                                                                                                                                                                                                                                                                                                                                                                                                                                                                                                                                                                                                                                                                                                                                                                                                                                                                                                                                                                                                                                                                                                                                                                                                                                                                                                                                                                                                                                                                                                                                                                                                                                  |
| LF | LF1229 | 1229 | CC1 | CGCGGATC    | 3.65E-05   | 3.65E-05   | 175   | 6  | 48726 | 159 | 0.00013889 | OCTAMERMOTIFTAH3H4 |                                                                                                                                                                                                                                                                                                                                                                                                                                                                                                                                                                                                                                                                                                                                                                                                                                                                                                                                                                                                                                                                                                                                                                                                                                                                                                                                                                                                                                                                                                                                                                                                                                                                                                                                                                                                                                                                                                                                                                                                                                                                                                                                                                                                                                                                                                                                                                                                                                                                                                                                                                                                                                                                                                                                                                                                                                                                                                                                                                                                                                                                                                                                                                                                                                                                                                                                                                                                                                                                                                                                                                                  |
| LF | LF1229 | 1229 | CC1 | GCCGCC      | 4.11E-09   | 4.11E-09   | 4526  | 41 | 44375 | 124 | 0.00013889 | GCCCORE            |                                                                                                                                                                                                                                                                                                                                                                                                                                                                                                                                                                                                                                                                                                                                                                                                                                                                                                                                                                                                                                                                                                                                                                                                                                                                                                                                                                                                                                                                                                                                                                                                                                                                                                                                                                                                                                                                                                                                                                                                                                                                                                                                                                                                                                                                                                                                                                                                                                                                                                                                                                                                                                                                                                                                                                                                                                                                                                                                                                                                                                                                                                                                                                                                                                                                                                                                                                                                                                                                                                                                                                                  |
| LF | LF1229 | 1229 | CC1 | RCCGAC      | 7.30E-05   | 4.22E-05   | 10277 | 57 | 38624 | 108 | 0.00013889 | DRECRTCOREAT       |                                                                                                                                                                                                                                                                                                                                                                                                                                                                                                                                                                                                                                                                                                                                                                                                                                                                                                                                                                                                                                                                                                                                                                                                                                                                                                                                                                                                                                                                                                                                                                                                                                                                                                                                                                                                                                                                                                                                                                                                                                                                                                                                                                                                                                                                                                                                                                                                                                                                                                                                                                                                                                                                                                                                                                                                                                                                                                                                                                                                                                                                                                                                                                                                                                                                                                                                                                                                                                                                                                                                                                                  |
| LF | LF1229 | 1229 | CC1 | VCGCGB      | 3.67E-06   | 2.38E-06   | 11066 | 64 | 37835 | 101 | 0.00013889 | CGCGBOXAT          |                                                                                                                                                                                                                                                                                                                                                                                                                                                                                                                                                                                                                                                                                                                                                                                                                                                                                                                                                                                                                                                                                                                                                                                                                                                                                                                                                                                                                                                                                                                                                                                                                                                                                                                                                                                                                                                                                                                                                                                                                                                                                                                                                                                                                                                                                                                                                                                                                                                                                                                                                                                                                                                                                                                                                                                                                                                                                                                                                                                                                                                                                                                                                                                                                                                                                                                                                                                                                                                                                                                                                                                  |
| LF | LF1229 | 1229 | CC2 | TGCAAAG     | 0.00001923 | 0.00001923 | 8527  | 9  | 40527 | 3   | 0.00013889 | PROLAMINBOXOSGLUB1 |                                                                                                                                                                                                                                                                                                                                                                                                                                                                                                                                                                                                                                                                                                                                                                                                                                                                                                                                                                                                                                                                                                                                                                                                                                                                                                                                                                                                                                                                                                                                                                                                                                                                                                                                                                                                                                                                                                                                                                                                                                                                                                                                                                                                                                                                                                                                                                                                                                                                                                                                                                                                                                                                                                                                                                                                                                                                                                                                                                                                                                                                                                                                                                                                                                                                                                                                                                                                                                                                                                                                                                                  |
| LF | LF1230 | 1230 | CC1 | ACGTSSSC    | 0.00004418 | 0.00004418 | 1979  | 17 | 46950 | 120 | 0.00013889 | ABREOSRAB21        |                                                                                                                                                                                                                                                                                                                                                                                                                                                                                                                                                                                                                                                                                                                                                                                                                                                                                                                                                                                                                                                                                                                                                                                                                                                                                                                                                                                                                                                                                                                                                                                                                                                                                                                                                                                                                                                                                                                                                                                                                                                                                                                                                                                                                                                                                                                                                                                                                                                                                                                                                                                                                                                                                                                                                                                                                                                                                                                                                                                                                                                                                                                                                                                                                                                                                                                                                                                                                                                                                                                                                                                  |
| LF | LF1230 | 1230 | CC1 | AGCCGCC     | 2.31E-05   | 2.31E-05   | 1497  | 15 | 47432 | 122 | 0.00013889 | AGCBOXNPGLB        |                                                                                                                                                                                                                                                                                                                                                                                                                                                                                                                                                                                                                                                                                                                                                                                                                                                                                                                                                                                                                                                                                                                                                                                                                                                                                                                                                                                                                                                                                                                                                                                                                                                                                                                                                                                                                                                                                                                                                                                                                                                                                                                                                                                                                                                                                                                                                                                                                                                                                                                                                                                                                                                                                                                                                                                                                                                                                                                                                                                                                                                                                                                                                                                                                                                                                                                                                                                                                                                                                                                                                                                  |
| LF | LF1230 | 1230 | CC1 | AGCGGG      | 2.38E-06   | 2.38E-06   | 4278  | 30 | 44651 | 107 | 0.00013889 | BS1EGCCR           |                                                                                                                                                                                                                                                                                                                                                                                                                                                                                                                                                                                                                                                                                                                                                                                                                                                                                                                                                                                                                                                                                                                                                                                                                                                                                                                                                                                                                                                                                                                                                                                                                                                                                                                                                                                                                                                                                                                                                                                                                                                                                                                                                                                                                                                                                                                                                                                                                                                                                                                                                                                                                                                                                                                                                                                                                                                                                                                                                                                                                                                                                                                                                                                                                                                                                                                                                                                                                                                                                                                                                                                  |
| LF | LF1230 | 1230 | CC1 | CATGGGCGCGG | 7.70E-05   | 7.70E-05   | 3     | 2  | 48926 | 135 | 0.00013889 | RE1ASPHYA3         |                                                                                                                                                                                                                                                                                                                                                                                                                                                                                                                                                                                                                                                                                                                                                                                                                                                                                                                                                                                                                                                                                                                                                                                                                                                                                                                                                                                                                                                                                                                                                                                                                                                                                                                                                                                                                                                                                                                                                                                                                                                                                                                                                                                                                                                                                                                                                                                                                                                                                                                                                                                                                                                                                                                                                                                                                                                                                                                                                                                                                                                                                                                                                                                                                                                                                                                                                                                                                                                                                                                                                                                  |
| LF | LF1230 | 1230 | CC1 | CCAGGTGG    | 5.50E-05   | 5.50E-05   | 596   | 9  | 48333 | 128 | 0.00013889 | SITEIOSPCNA        |                                                                                                                                                                                                                                                                                                                                                                                                                                                                                                                                                                                                                                                                                                                                                                                                                                                                                                                                                                                                                                                                                                                                                                                                                                                                                                                                                                                                                                                                                                                                                                                                                                                                                                                                                                                                                                                                                                                                                                                                                                                                                                                                                                                                                                                                                                                                                                                                                                                                                                                                                                                                                                                                                                                                                                                                                                                                                                                                                                                                                                                                                                                                                                                                                                                                                                                                                                                                                                                                                                                                                                                  |

|    |        |      |     |            |            |            |       |    |       |     |            |                    |                                                                                                                                                                                                                                                                                                                                                                                                                                                                                                                                                                                                                                                                                                                                                                                                                                                                                                                                                                                                                                                                                                                                                                                                                                                                                                                                                                                                                                                                                                                                                                                                                                                                                                                                                                                                                                                                                                                                                                                                                                                                                                                                                                                                                                                                                                                                                                                                                                                                                                                                                                                                                                                                                                                                                                                                                                                                                                                                                                                                                                                                                                                                                                                                                                                                                                                                                                                                                                                                                                                                                                                                                                                   |
|----|--------|------|-----|------------|------------|------------|-------|----|-------|-----|------------|--------------------|---------------------------------------------------------------------------------------------------------------------------------------------------------------------------------------------------------------------------------------------------------------------------------------------------------------------------------------------------------------------------------------------------------------------------------------------------------------------------------------------------------------------------------------------------------------------------------------------------------------------------------------------------------------------------------------------------------------------------------------------------------------------------------------------------------------------------------------------------------------------------------------------------------------------------------------------------------------------------------------------------------------------------------------------------------------------------------------------------------------------------------------------------------------------------------------------------------------------------------------------------------------------------------------------------------------------------------------------------------------------------------------------------------------------------------------------------------------------------------------------------------------------------------------------------------------------------------------------------------------------------------------------------------------------------------------------------------------------------------------------------------------------------------------------------------------------------------------------------------------------------------------------------------------------------------------------------------------------------------------------------------------------------------------------------------------------------------------------------------------------------------------------------------------------------------------------------------------------------------------------------------------------------------------------------------------------------------------------------------------------------------------------------------------------------------------------------------------------------------------------------------------------------------------------------------------------------------------------------------------------------------------------------------------------------------------------------------------------------------------------------------------------------------------------------------------------------------------------------------------------------------------------------------------------------------------------------------------------------------------------------------------------------------------------------------------------------------------------------------------------------------------------------------------------------------------------------------------------------------------------------------------------------------------------------------------------------------------------------------------------------------------------------------------------------------------------------------------------------------------------------------------------------------------------------------------------------------------------------------------------------------------------------|
| LF | LF1230 | 1230 | CC1 | GCCGCC     | 2.55E-08   | 2.55E-08   | 4532  | 35 | 44397 | 102 | 0.00013889 | GCCCORE            | Core of GCC-box found in many pathogen-responsive genes such as PDF1.2, Thi2.1, and PR4; Has been shown to function as ethylene-responsive element; See S000036, S000232, S000332; Appears to play important roles in regulating jasmonate-responsive gene expression; Tomato Pti4 (ERF) regulates defence-related gene expression via GCC box and non-GCC box cis elements (Myb1(GTTAGTT) and G-box(CACGTG)); Core motif of DRE/CRT (dehydration-responsive element/C-repeat) cis-acting element found in many genes in Arabidopsis and in rice; R=G/A; Os DREB1A bound to GCCGAC more preferentially than to ACCGAC whereas At DREB1A bound to both GCCGAC and ACCGAC efficiently; See S000402(ACCGAC); Maize ZmDREB1A bound to DRE (Qin et al. 2004); HaDREB2in Helianthus annuus (sunflower)(Diaz-Martin et al. 2005); HaDREB2physically interact with HaHSFA9 in vitro (Diaz-Martin et al. 2005); CGCG box recognized by AtSR1-6 (Arabidopsis thaliana signal-responsive genes); Multiple CGCG elements are found in promoters of many genes; Ca++/calmodulin binds to all AtSRs; V=A/C/G; B=G/T/C; Prolamine box found in the rice (O.s.) GluB-1gene promoter; Involved in quantitative regulation of the GluB-1gene; See S000276, S000277, S000278 (for elements in GluB-1); See S000001, S000091, S000265, S000341(for Prolamin box); XBP1binding site-like sequence found in the plant UPRE (unfolded protein response element) in A.t.; See S000428; Either of ERSEII or XBP1binding sites is essential and sufficient for the UPR; See S000425 (CCACGTCA), S000426; C-box according to the nomenclature of ACGT elements by Foster et al. (FASEB J 8:192-200 (1994)); One of ACGT elements; Factors groups 1, 2and 3have affinity for C-box (Izawa et al. J Mol Biol. 230:1131-1144 (1993)); RITA-1binding site (Izawa et al. 1994); Palindromic C-box in soybean (G.m.); bZIP factors, STGA1and STFs (STF1and STF2) found in soybean apical hypocotyl, bind to this sequence; XBP1binding site-like sequence found in the plant UPRE (unfolded protein response element) in A.t.; See S000428; Either of ERSEII or XBP1binding sites is essential and sufficient for the UPR; See S000425 (CCACGTCA), S000426; C-box according to the nomenclature of ACGT elements by Foster et al. (FASEB J 8:192-200 (1994)); One of ACGT elements; Factors groups 1, 2and 3have affinity for C-box (Izawa et al. J Mol Biol. 230:1131-1144 (1993)); RITA-1binding site (Izawa et al. 1994); opaque-2binding site of maize (Z.m.) b-32(type I ribosome-inactivating protein gene; O2; O2S; O2S and GARE form a gibberellin response complex (GARC)(Rogers and Rogers, 1992); Palindromic C-box in soybean (G.m.); bZIP factors, STGA1and STFs (STF1and STF2) found in soybean apical hypocotyl, bind to this sequence; XBP1binding site-like sequence found in the plant UPRE (unfolded protein response element) in A.t.; See S000428; Either of ERSEII or XBP1binding sites is essential and sufficient for the UPR; See S000425 (CCACGTCA), S000426; C-box according to the nomenclature of ACGT elements by Foster et al. (FASEB J 8:192-200 (1994)); One of ACGT elements; Factors groups 1, 2and 3have affinity for C-box (Izawa et al. J Mol Biol. 230:1131-1144 (1993)); RITA-1binding site (Izawa et al. 1994); opaque-2binding site of maize (Z.m.) b-32(type I ribosome-inactivating protein gene; O2; O2S; O2S and GARE form a gibberellin response complex (GARC)(Rogers and Rogers, 1992); Palindromic C-box in soybean (G.m.); bZIP factors, STGA1and STFs (STF1and STF2) found in soybean apical hypocotyl, bind to this sequence; |
| LF | LF1230 | 1230 | CC1 | RCCGAC     | 0.00014141 | 0.00011024 | 10286 | 48 | 38643 | 89  | 0.00013889 | DRERTCOREAT        |                                                                                                                                                                                                                                                                                                                                                                                                                                                                                                                                                                                                                                                                                                                                                                                                                                                                                                                                                                                                                                                                                                                                                                                                                                                                                                                                                                                                                                                                                                                                                                                                                                                                                                                                                                                                                                                                                                                                                                                                                                                                                                                                                                                                                                                                                                                                                                                                                                                                                                                                                                                                                                                                                                                                                                                                                                                                                                                                                                                                                                                                                                                                                                                                                                                                                                                                                                                                                                                                                                                                                                                                                                                   |
| LF | LF1230 | 1230 | CC1 | VCGCGB     | 9.59E-07   | 6.00E-07   | 11073 | 57 | 37856 | 80  | 0.00013889 | CGCGBOXAT          |                                                                                                                                                                                                                                                                                                                                                                                                                                                                                                                                                                                                                                                                                                                                                                                                                                                                                                                                                                                                                                                                                                                                                                                                                                                                                                                                                                                                                                                                                                                                                                                                                                                                                                                                                                                                                                                                                                                                                                                                                                                                                                                                                                                                                                                                                                                                                                                                                                                                                                                                                                                                                                                                                                                                                                                                                                                                                                                                                                                                                                                                                                                                                                                                                                                                                                                                                                                                                                                                                                                                                                                                                                                   |
| LF | LF1230 | 1230 | CC2 | TGCAAAG    | 0.00001923 | 0.00001923 | 8527  | 9  | 40527 | 3   | 0.00013889 | PROLAMINBOXOSGLUB1 |                                                                                                                                                                                                                                                                                                                                                                                                                                                                                                                                                                                                                                                                                                                                                                                                                                                                                                                                                                                                                                                                                                                                                                                                                                                                                                                                                                                                                                                                                                                                                                                                                                                                                                                                                                                                                                                                                                                                                                                                                                                                                                                                                                                                                                                                                                                                                                                                                                                                                                                                                                                                                                                                                                                                                                                                                                                                                                                                                                                                                                                                                                                                                                                                                                                                                                                                                                                                                                                                                                                                                                                                                                                   |
| LF | LF1447 | 1447 | CC1 | CCACGTCATC | 6.18E-06   | 6.18E-06   | 208   | 10 | 48494 | 354 | 0.00013889 | UPRE2AT            |                                                                                                                                                                                                                                                                                                                                                                                                                                                                                                                                                                                                                                                                                                                                                                                                                                                                                                                                                                                                                                                                                                                                                                                                                                                                                                                                                                                                                                                                                                                                                                                                                                                                                                                                                                                                                                                                                                                                                                                                                                                                                                                                                                                                                                                                                                                                                                                                                                                                                                                                                                                                                                                                                                                                                                                                                                                                                                                                                                                                                                                                                                                                                                                                                                                                                                                                                                                                                                                                                                                                                                                                                                                   |
| LF | LF1447 | 1447 | CC1 | GACGTC     | 2.62E-05   | 0.00001791 | 2700  | 41 | 46002 | 323 | 0.00013889 | ACGTCBOX           |                                                                                                                                                                                                                                                                                                                                                                                                                                                                                                                                                                                                                                                                                                                                                                                                                                                                                                                                                                                                                                                                                                                                                                                                                                                                                                                                                                                                                                                                                                                                                                                                                                                                                                                                                                                                                                                                                                                                                                                                                                                                                                                                                                                                                                                                                                                                                                                                                                                                                                                                                                                                                                                                                                                                                                                                                                                                                                                                                                                                                                                                                                                                                                                                                                                                                                                                                                                                                                                                                                                                                                                                                                                   |
| LF | LF1447 | 1447 | CC1 | TGACGTCA   | 1.40E-05   | 1.40E-05   | 337   | 12 | 48365 | 352 | 0.00013889 | PALINDROMICCBBOXGM |                                                                                                                                                                                                                                                                                                                                                                                                                                                                                                                                                                                                                                                                                                                                                                                                                                                                                                                                                                                                                                                                                                                                                                                                                                                                                                                                                                                                                                                                                                                                                                                                                                                                                                                                                                                                                                                                                                                                                                                                                                                                                                                                                                                                                                                                                                                                                                                                                                                                                                                                                                                                                                                                                                                                                                                                                                                                                                                                                                                                                                                                                                                                                                                                                                                                                                                                                                                                                                                                                                                                                                                                                                                   |
| LF | LF1449 | 1449 | CC1 | CCACGTCATC | 0.00001042 | 0.00001042 | 207   | 11 | 48385 | 463 | 0.00013889 | UPRE2AT            |                                                                                                                                                                                                                                                                                                                                                                                                                                                                                                                                                                                                                                                                                                                                                                                                                                                                                                                                                                                                                                                                                                                                                                                                                                                                                                                                                                                                                                                                                                                                                                                                                                                                                                                                                                                                                                                                                                                                                                                                                                                                                                                                                                                                                                                                                                                                                                                                                                                                                                                                                                                                                                                                                                                                                                                                                                                                                                                                                                                                                                                                                                                                                                                                                                                                                                                                                                                                                                                                                                                                                                                                                                                   |
| LF | LF1449 | 1449 | CC1 | GACGTC     | 4.60E-05   | 2.91E-05   | 2692  | 49 | 45900 | 425 | 0.00013889 | ACGTCBOX           |                                                                                                                                                                                                                                                                                                                                                                                                                                                                                                                                                                                                                                                                                                                                                                                                                                                                                                                                                                                                                                                                                                                                                                                                                                                                                                                                                                                                                                                                                                                                                                                                                                                                                                                                                                                                                                                                                                                                                                                                                                                                                                                                                                                                                                                                                                                                                                                                                                                                                                                                                                                                                                                                                                                                                                                                                                                                                                                                                                                                                                                                                                                                                                                                                                                                                                                                                                                                                                                                                                                                                                                                                                                   |
| LF | LF1449 | 1449 | CC1 | GATGAYRTGG | 0.00012619 | 0.00012619 | 718   | 19 | 47874 | 455 | 0.00013889 | OPAQUE2ZMB32       |                                                                                                                                                                                                                                                                                                                                                                                                                                                                                                                                                                                                                                                                                                                                                                                                                                                                                                                                                                                                                                                                                                                                                                                                                                                                                                                                                                                                                                                                                                                                                                                                                                                                                                                                                                                                                                                                                                                                                                                                                                                                                                                                                                                                                                                                                                                                                                                                                                                                                                                                                                                                                                                                                                                                                                                                                                                                                                                                                                                                                                                                                                                                                                                                                                                                                                                                                                                                                                                                                                                                                                                                                                                   |
| LF | LF1449 | 1449 | CC1 | TGACGTCA   | 9.49E-06   | 9.49E-06   | 335   | 14 | 48257 | 460 | 0.00013889 | PALINDROMICCBBOXGM |                                                                                                                                                                                                                                                                                                                                                                                                                                                                                                                                                                                                                                                                                                                                                                                                                                                                                                                                                                                                                                                                                                                                                                                                                                                                                                                                                                                                                                                                                                                                                                                                                                                                                                                                                                                                                                                                                                                                                                                                                                                                                                                                                                                                                                                                                                                                                                                                                                                                                                                                                                                                                                                                                                                                                                                                                                                                                                                                                                                                                                                                                                                                                                                                                                                                                                                                                                                                                                                                                                                                                                                                                                                   |
| LF | LF1450 | 1450 | CC1 | CCACGTCATC | 0.00000111 | 0.00000111 | 205   | 13 | 48320 | 528 | 0.00013889 | UPRE2AT            |                                                                                                                                                                                                                                                                                                                                                                                                                                                                                                                                                                                                                                                                                                                                                                                                                                                                                                                                                                                                                                                                                                                                                                                                                                                                                                                                                                                                                                                                                                                                                                                                                                                                                                                                                                                                                                                                                                                                                                                                                                                                                                                                                                                                                                                                                                                                                                                                                                                                                                                                                                                                                                                                                                                                                                                                                                                                                                                                                                                                                                                                                                                                                                                                                                                                                                                                                                                                                                                                                                                                                                                                                                                   |
| LF | LF1450 | 1450 | CC1 | GACGTC     | 1.15E-05   | 7.89E-06   | 2685  | 56 | 45840 | 485 | 0.00013889 | ACGTCBOX           |                                                                                                                                                                                                                                                                                                                                                                                                                                                                                                                                                                                                                                                                                                                                                                                                                                                                                                                                                                                                                                                                                                                                                                                                                                                                                                                                                                                                                                                                                                                                                                                                                                                                                                                                                                                                                                                                                                                                                                                                                                                                                                                                                                                                                                                                                                                                                                                                                                                                                                                                                                                                                                                                                                                                                                                                                                                                                                                                                                                                                                                                                                                                                                                                                                                                                                                                                                                                                                                                                                                                                                                                                                                   |
| LF | LF1450 | 1450 | CC1 | GATGAYRTGG | 0.00008927 | 0.00008927 | 716   | 21 | 47809 | 520 | 0.00013889 | OPAQUE2ZMB32       |                                                                                                                                                                                                                                                                                                                                                                                                                                                                                                                                                                                                                                                                                                                                                                                                                                                                                                                                                                                                                                                                                                                                                                                                                                                                                                                                                                                                                                                                                                                                                                                                                                                                                                                                                                                                                                                                                                                                                                                                                                                                                                                                                                                                                                                                                                                                                                                                                                                                                                                                                                                                                                                                                                                                                                                                                                                                                                                                                                                                                                                                                                                                                                                                                                                                                                                                                                                                                                                                                                                                                                                                                                                   |
| LF | LF1450 | 1450 | CC1 | TGACGTCA   | 4.05E-05   | 4.05E-05   | 335   | 14 | 48190 | 527 | 0.00013889 | PALINDROMICCBBOXGM |                                                                                                                                                                                                                                                                                                                                                                                                                                                                                                                                                                                                                                                                                                                                                                                                                                                                                                                                                                                                                                                                                                                                                                                                                                                                                                                                                                                                                                                                                                                                                                                                                                                                                                                                                                                                                                                                                                                                                                                                                                                                                                                                                                                                                                                                                                                                                                                                                                                                                                                                                                                                                                                                                                                                                                                                                                                                                                                                                                                                                                                                                                                                                                                                                                                                                                                                                                                                                                                                                                                                                                                                                                                   |

|    |        |      |     |            |            |            |      |    |       |     |            |                    |                                                                                                                                                                                                                                                                                                                                                                                                                                                                                                                                                                                                                                                                                                                                                                                                                                                                                                                                                                                                                                                                                                                                                                                                                                                                                                                                                                                                                                                                                                                                                                                                                                                                                                                                                                                                                                                                                                                                                                                                                                                                                                                                                                                                                                                                                                                                                                                                                                                                                                                                                                                                                                                                                                                                                                                                                                                                                                                                                                                                                                                                                                                                                                                                                                                                                                                                                                                                                                                                                                                                                                                                                                                                                                                                               |
|----|--------|------|-----|------------|------------|------------|------|----|-------|-----|------------|--------------------|-----------------------------------------------------------------------------------------------------------------------------------------------------------------------------------------------------------------------------------------------------------------------------------------------------------------------------------------------------------------------------------------------------------------------------------------------------------------------------------------------------------------------------------------------------------------------------------------------------------------------------------------------------------------------------------------------------------------------------------------------------------------------------------------------------------------------------------------------------------------------------------------------------------------------------------------------------------------------------------------------------------------------------------------------------------------------------------------------------------------------------------------------------------------------------------------------------------------------------------------------------------------------------------------------------------------------------------------------------------------------------------------------------------------------------------------------------------------------------------------------------------------------------------------------------------------------------------------------------------------------------------------------------------------------------------------------------------------------------------------------------------------------------------------------------------------------------------------------------------------------------------------------------------------------------------------------------------------------------------------------------------------------------------------------------------------------------------------------------------------------------------------------------------------------------------------------------------------------------------------------------------------------------------------------------------------------------------------------------------------------------------------------------------------------------------------------------------------------------------------------------------------------------------------------------------------------------------------------------------------------------------------------------------------------------------------------------------------------------------------------------------------------------------------------------------------------------------------------------------------------------------------------------------------------------------------------------------------------------------------------------------------------------------------------------------------------------------------------------------------------------------------------------------------------------------------------------------------------------------------------------------------------------------------------------------------------------------------------------------------------------------------------------------------------------------------------------------------------------------------------------------------------------------------------------------------------------------------------------------------------------------------------------------------------------------------------------------------------------------------------|
| LF | LF1451 | 1451 | CC1 | CCACGTCATC | 4.04E-06   | 4.04E-06   | 205  | 13 | 48252 | 596 | 0.00013889 | UPRE2AT            | <p>XBP1binding site-like sequence found in the plant UPRE (unfolded protein response element) in A.t.; See S000428; Either of ERSEII or XBP1binding sites is essential and sufficient for the UPR; See S000425 (CCACGTCA), S000426; C-box according to the nomenclature of ACGT elements by Foster et al. (FASEB J 8:192-200 (1994)); One of ACGT elements; Factors groups 1, 2and 3have affinity for C-box (Izawa et al. J Mol Biol. 230:1131-1144 (1993)); RITA-1binding site (Izawa et al. 1994);</p> <p>Octamer motif found in histone-gene-specific consensus sequences; 200 base upstream from the initiation codon ATG; Exist in all of seven plant histone genes;</p> <p>XBP1binding site-like sequence found in the plant UPRE (unfolded protein response element) in A.t.; See S000428; Either of ERSEII or XBP1binding sites is essential and sufficient for the UPR; See S000425 (CCACGTCA), S000426; C-box according to the nomenclature of ACGT elements by Foster et al. (FASEB J 8:192-200 (1994)); One of ACGT elements; Factors groups 1, 2and 3have affinity for C-box (Izawa et al. J Mol Biol. 230:1131-1144 (1993)); RITA-1binding site (Izawa et al. 1994);</p> <p>TGA-box #2in putative auxin-resonsive element (AUXRE) E1of soybean (G.m.) GH3promoter; Strong binding site for proteins in plant nuclear extracts; Hex-like element; E1element=-249 to -203; E2element=-241to -224; Called G-box by Liu et al. (1997);</p> <p>XBP1binding site-like sequence found in the plant UPRE (unfolded protein response element) in A.t.; See S000428; Either of ERSEII or XBP1binding sites is essential and sufficient for the UPR; See S000425 (CCACGTCA), S000426; C-box according to the nomenclature of ACGT elements by Foster et al. (FASEB J 8:192-200 (1994)); One of ACGT elements; Factors groups 1, 2and 3have affinity for C-box (Izawa et al. J Mol Biol. 230:1131-1144 (1993)); RITA-1binding site (Izawa et al. 1994);</p> <p>TGA-box #2in putative auxin-resonsive element (AUXRE) E1of soybean (G.m.) GH3promoter; Strong binding site for proteins in plant nuclear extracts; Hex-like element; E1element=-249 to -203; E2element=-241to -224; Called G-box by Liu et al. (1997);</p> <p>XBP1binding site-like sequence found in the plant UPRE (unfolded protein response element) in A.t.; See S000428; Either of ERSEII or XBP1binding sites is essential and sufficient for the UPR; See S000425 (CCACGTCA), S000426; C-box according to the nomenclature of ACGT elements by Foster et al. (FASEB J 8:192-200 (1994)); One of ACGT elements; Factors groups 1, 2and 3have affinity for C-box (Izawa et al. J Mol Biol. 230:1131-1144 (1993)); RITA-1binding site (Izawa et al. 1994);</p> <p>Palindromic C-box in soybean (G.m.); bZIP factors, STGA1and STFs (STF1and STF2) found in soybean apical hypocotyl, bind to this sequence;</p> <p>TGA-box #2in putative auxin-resonsive element (AUXRE) E1of soybean (G.m.) GH3promoter; Strong binding site for proteins in plant nuclear extracts; Hex-like element; E1element=-249 to -203; E2element=-241to -224; Called G-box by Liu et al. (1997);</p> <p>XBP1binding site-like sequence found in the plant UPRE (unfolded protein response element) in A.t.; See S000428; Either of ERSEII or XBP1binding sites is essential and sufficient for the UPR; See S000425 (CCACGTCA), S000426; C-box according to the nomenclature of ACGT elements by Foster et al. (FASEB J 8:192-200 (1994)); One of ACGT elements; Factors groups 1, 2and 3have affinity for C-box (Izawa et al. J Mol Biol. 230:1131-1144 (1993)); RITA-1binding site (Izawa et al. 1994);</p> <p>Palindromic C-box in soybean (G.m.); bZIP factors, STGA1and STFs (STF1and</p> |
| LF | LF1451 | 1451 | CC1 | GACGTC     | 0.00005433 | 3.27E-05   | 2682 | 59 | 45775 | 550 | 0.00013889 | ACGTCBOX           |                                                                                                                                                                                                                                                                                                                                                                                                                                                                                                                                                                                                                                                                                                                                                                                                                                                                                                                                                                                                                                                                                                                                                                                                                                                                                                                                                                                                                                                                                                                                                                                                                                                                                                                                                                                                                                                                                                                                                                                                                                                                                                                                                                                                                                                                                                                                                                                                                                                                                                                                                                                                                                                                                                                                                                                                                                                                                                                                                                                                                                                                                                                                                                                                                                                                                                                                                                                                                                                                                                                                                                                                                                                                                                                                               |
| LF | LF1451 | 1451 | CC2 | CGCGGCAT   | 4.43E-05   | 4.43E-05   | 265  | 3  | 48788 | 10  | 0.00013889 | OCTAMOTIF2         |                                                                                                                                                                                                                                                                                                                                                                                                                                                                                                                                                                                                                                                                                                                                                                                                                                                                                                                                                                                                                                                                                                                                                                                                                                                                                                                                                                                                                                                                                                                                                                                                                                                                                                                                                                                                                                                                                                                                                                                                                                                                                                                                                                                                                                                                                                                                                                                                                                                                                                                                                                                                                                                                                                                                                                                                                                                                                                                                                                                                                                                                                                                                                                                                                                                                                                                                                                                                                                                                                                                                                                                                                                                                                                                                               |
| LF | LF1452 | 1452 | CC1 | CCACGTCATC | 8.10E-06   | 8.10E-06   | 205  | 13 | 48211 | 637 | 0.00013889 | UPRE2AT            |                                                                                                                                                                                                                                                                                                                                                                                                                                                                                                                                                                                                                                                                                                                                                                                                                                                                                                                                                                                                                                                                                                                                                                                                                                                                                                                                                                                                                                                                                                                                                                                                                                                                                                                                                                                                                                                                                                                                                                                                                                                                                                                                                                                                                                                                                                                                                                                                                                                                                                                                                                                                                                                                                                                                                                                                                                                                                                                                                                                                                                                                                                                                                                                                                                                                                                                                                                                                                                                                                                                                                                                                                                                                                                                                               |
| LF | LF1452 | 1452 | CC1 | GACGTC     | 3.07E-05   | 1.78E-05   | 2678 | 63 | 45738 | 587 | 0.00013889 | ACGTCBOX           |                                                                                                                                                                                                                                                                                                                                                                                                                                                                                                                                                                                                                                                                                                                                                                                                                                                                                                                                                                                                                                                                                                                                                                                                                                                                                                                                                                                                                                                                                                                                                                                                                                                                                                                                                                                                                                                                                                                                                                                                                                                                                                                                                                                                                                                                                                                                                                                                                                                                                                                                                                                                                                                                                                                                                                                                                                                                                                                                                                                                                                                                                                                                                                                                                                                                                                                                                                                                                                                                                                                                                                                                                                                                                                                                               |
| LF | LF1452 | 1452 | CC1 | TGACGTGGC  | 0.00012662 | 0.00012662 | 432  | 17 | 47984 | 633 | 0.00013889 | AUXRETGA2GMGH3     |                                                                                                                                                                                                                                                                                                                                                                                                                                                                                                                                                                                                                                                                                                                                                                                                                                                                                                                                                                                                                                                                                                                                                                                                                                                                                                                                                                                                                                                                                                                                                                                                                                                                                                                                                                                                                                                                                                                                                                                                                                                                                                                                                                                                                                                                                                                                                                                                                                                                                                                                                                                                                                                                                                                                                                                                                                                                                                                                                                                                                                                                                                                                                                                                                                                                                                                                                                                                                                                                                                                                                                                                                                                                                                                                               |
| LF | LF1453 | 1453 | CC1 | CCACGTCATC | 3.07E-06   | 3.07E-06   | 204  | 14 | 48172 | 676 | 0.00013889 | UPRE2AT            |                                                                                                                                                                                                                                                                                                                                                                                                                                                                                                                                                                                                                                                                                                                                                                                                                                                                                                                                                                                                                                                                                                                                                                                                                                                                                                                                                                                                                                                                                                                                                                                                                                                                                                                                                                                                                                                                                                                                                                                                                                                                                                                                                                                                                                                                                                                                                                                                                                                                                                                                                                                                                                                                                                                                                                                                                                                                                                                                                                                                                                                                                                                                                                                                                                                                                                                                                                                                                                                                                                                                                                                                                                                                                                                                               |
| LF | LF1453 | 1453 | CC1 | GACGTC     | 2.53E-05   | 0.00001734 | 2675 | 66 | 45701 | 624 | 0.00013889 | ACGTCBOX           |                                                                                                                                                                                                                                                                                                                                                                                                                                                                                                                                                                                                                                                                                                                                                                                                                                                                                                                                                                                                                                                                                                                                                                                                                                                                                                                                                                                                                                                                                                                                                                                                                                                                                                                                                                                                                                                                                                                                                                                                                                                                                                                                                                                                                                                                                                                                                                                                                                                                                                                                                                                                                                                                                                                                                                                                                                                                                                                                                                                                                                                                                                                                                                                                                                                                                                                                                                                                                                                                                                                                                                                                                                                                                                                                               |
| LF | LF1453 | 1453 | CC1 | TGACGTGGC  | 8.35E-05   | 8.35E-05   | 431  | 18 | 47945 | 672 | 0.00013889 | AUXRETGA2GMGH3     |                                                                                                                                                                                                                                                                                                                                                                                                                                                                                                                                                                                                                                                                                                                                                                                                                                                                                                                                                                                                                                                                                                                                                                                                                                                                                                                                                                                                                                                                                                                                                                                                                                                                                                                                                                                                                                                                                                                                                                                                                                                                                                                                                                                                                                                                                                                                                                                                                                                                                                                                                                                                                                                                                                                                                                                                                                                                                                                                                                                                                                                                                                                                                                                                                                                                                                                                                                                                                                                                                                                                                                                                                                                                                                                                               |
| LF | LF1454 | 1454 | CC1 | CCACGTCATC | 4.83E-06   | 4.83E-06   | 204  | 14 | 48144 | 704 | 0.00013889 | UPRE2AT            |                                                                                                                                                                                                                                                                                                                                                                                                                                                                                                                                                                                                                                                                                                                                                                                                                                                                                                                                                                                                                                                                                                                                                                                                                                                                                                                                                                                                                                                                                                                                                                                                                                                                                                                                                                                                                                                                                                                                                                                                                                                                                                                                                                                                                                                                                                                                                                                                                                                                                                                                                                                                                                                                                                                                                                                                                                                                                                                                                                                                                                                                                                                                                                                                                                                                                                                                                                                                                                                                                                                                                                                                                                                                                                                                               |
| LF | LF1454 | 1454 | CC1 | GACGTC     | 1.25E-05   | 9.71E-06   | 2672 | 69 | 45676 | 649 | 0.00013889 | ACGTCBOX           |                                                                                                                                                                                                                                                                                                                                                                                                                                                                                                                                                                                                                                                                                                                                                                                                                                                                                                                                                                                                                                                                                                                                                                                                                                                                                                                                                                                                                                                                                                                                                                                                                                                                                                                                                                                                                                                                                                                                                                                                                                                                                                                                                                                                                                                                                                                                                                                                                                                                                                                                                                                                                                                                                                                                                                                                                                                                                                                                                                                                                                                                                                                                                                                                                                                                                                                                                                                                                                                                                                                                                                                                                                                                                                                                               |
| LF | LF1454 | 1454 | CC1 | TGACGTCA   | 6.88E-05   | 6.88E-05   | 333  | 16 | 48015 | 702 | 0.00013889 | PALINDROMICCBBOXGM |                                                                                                                                                                                                                                                                                                                                                                                                                                                                                                                                                                                                                                                                                                                                                                                                                                                                                                                                                                                                                                                                                                                                                                                                                                                                                                                                                                                                                                                                                                                                                                                                                                                                                                                                                                                                                                                                                                                                                                                                                                                                                                                                                                                                                                                                                                                                                                                                                                                                                                                                                                                                                                                                                                                                                                                                                                                                                                                                                                                                                                                                                                                                                                                                                                                                                                                                                                                                                                                                                                                                                                                                                                                                                                                                               |
| LF | LF1454 | 1454 | CC1 | TGACGTGGC  | 4.42E-05   | 4.42E-05   | 430  | 19 | 47918 | 699 | 0.00013889 | AUXRETGA2GMGH3     |                                                                                                                                                                                                                                                                                                                                                                                                                                                                                                                                                                                                                                                                                                                                                                                                                                                                                                                                                                                                                                                                                                                                                                                                                                                                                                                                                                                                                                                                                                                                                                                                                                                                                                                                                                                                                                                                                                                                                                                                                                                                                                                                                                                                                                                                                                                                                                                                                                                                                                                                                                                                                                                                                                                                                                                                                                                                                                                                                                                                                                                                                                                                                                                                                                                                                                                                                                                                                                                                                                                                                                                                                                                                                                                                               |
| LF | LF1455 | 1455 | CC1 | CCACGTCATC | 5.39E-06   | 5.39E-06   | 204  | 14 | 48137 | 711 | 0.00013889 | UPRE2AT            |                                                                                                                                                                                                                                                                                                                                                                                                                                                                                                                                                                                                                                                                                                                                                                                                                                                                                                                                                                                                                                                                                                                                                                                                                                                                                                                                                                                                                                                                                                                                                                                                                                                                                                                                                                                                                                                                                                                                                                                                                                                                                                                                                                                                                                                                                                                                                                                                                                                                                                                                                                                                                                                                                                                                                                                                                                                                                                                                                                                                                                                                                                                                                                                                                                                                                                                                                                                                                                                                                                                                                                                                                                                                                                                                               |
| LF | LF1455 | 1455 | CC1 | GACGTC     | 9.34E-06   | 7.18E-06   | 2671 | 70 | 45670 | 655 | 0.00013889 | ACGTCBOX           |                                                                                                                                                                                                                                                                                                                                                                                                                                                                                                                                                                                                                                                                                                                                                                                                                                                                                                                                                                                                                                                                                                                                                                                                                                                                                                                                                                                                                                                                                                                                                                                                                                                                                                                                                                                                                                                                                                                                                                                                                                                                                                                                                                                                                                                                                                                                                                                                                                                                                                                                                                                                                                                                                                                                                                                                                                                                                                                                                                                                                                                                                                                                                                                                                                                                                                                                                                                                                                                                                                                                                                                                                                                                                                                                               |
| LF | LF1455 | 1455 | CC1 | TGACGTCA   | 0.00007693 | 0.00007693 | 333  | 16 | 48008 | 709 | 0.00013889 | PALINDROMICCBBOXGM |                                                                                                                                                                                                                                                                                                                                                                                                                                                                                                                                                                                                                                                                                                                                                                                                                                                                                                                                                                                                                                                                                                                                                                                                                                                                                                                                                                                                                                                                                                                                                                                                                                                                                                                                                                                                                                                                                                                                                                                                                                                                                                                                                                                                                                                                                                                                                                                                                                                                                                                                                                                                                                                                                                                                                                                                                                                                                                                                                                                                                                                                                                                                                                                                                                                                                                                                                                                                                                                                                                                                                                                                                                                                                                                                               |

|    |        |      |     |            |            |            |      |    |       |     |            |                |
|----|--------|------|-----|------------|------------|------------|------|----|-------|-----|------------|----------------|
| LF | LF1455 | 1455 | CC1 | TGACGTGGC  | 5.03E-05   | 5.03E-05   | 430  | 19 | 47911 | 706 | 0.00013889 | AUXRETGA2GMGH3 |
| LF | LF1456 | 1456 | CC1 | CCACGTCATC | 8.38E-07   | 8.38E-07   | 203  | 15 | 48152 | 696 | 0.00013889 | UPRE2AT        |
| LF | LF1456 | 1456 | CC1 | GACGTC     | 1.07E-05   | 7.02E-06   | 2672 | 69 | 45683 | 642 | 0.00013889 | ACGTCBOX       |
| LF | LF1456 | 1456 | CC1 | TGACGTGGC  | 0.00003879 | 0.00003879 | 430  | 19 | 47925 | 692 | 0.00013889 | AUXRETGA2GMGH3 |
| LF | LF1457 | 1457 | CC1 | CCACGTCATC | 5.81E-05   | 5.81E-05   | 206  | 12 | 48183 | 665 | 0.00013889 | UPRE2AT        |
| LF | LF1457 | 1457 | CC1 | GACGTC     | 0.00018618 | 0.00010644 | 2679 | 62 | 45710 | 615 | 0.00013889 | ACGTCBOX       |
| LF | LF1458 | 1458 | CC1 | CCACGTCATC | 0.00013275 | 0.00013275 | 207  | 11 | 48230 | 618 | 0.00013889 | UPRE2AT        |
| LF | LF1459 | 1459 | CC1 | CCACGTCATC | 3.86E-05   | 3.86E-05   | 207  | 11 | 48312 | 536 | 0.00013889 | UPRE2AT        |
| LF | LF1567 | 1567 | CC1 | AATAGAAAA  | 0.00000383 | 0.00000383 | 5594 | 9  | 43458 | 5   | 0.00013889 | SURE1STPAT21   |
| LF | LF1568 | 1568 | CC1 | AATAGAAAA  | 2.33E-05   | 2.33E-05   | 5593 | 10 | 43453 | 10  | 0.00013889 | SURE1STPAT21   |
| LF | LF1569 | 1569 | CC1 | AATAGAAAA  | 3.99E-05   | 3.99E-05   | 5593 | 10 | 43452 | 11  | 0.00013889 | SURE1STPAT21   |
| LF | LF1571 | 1571 | CC1 | AATAGAAAA  | 8.80E-05   | 8.80E-05   | 5595 | 8  | 43456 | 7   | 0.00013889 | SURE1STPAT21   |
| LF | LF1572 | 1572 | CC1 | AATAGAAAA  | 4.56E-05   | 4.56E-05   | 5595 | 8  | 43457 | 6   | 0.00013889 | SURE1STPAT21   |
| RT | RT1088 | 1088 | CC2 | AAACCCTA   | 8.94E-06   | 8.94E-06   | 6406 | 18 | 42614 | 28  | 0.00013889 | UP2ATMSD       |
| RT | RT1089 | 1089 | CC2 | AAACCCTA   | 8.33E-05   | 8.33E-05   | 6403 | 21 | 42596 | 46  | 0.00013889 | UP2ATMSD       |

STF2) found in soybean apical hypocotyl, bind to this sequence;  
TGA-box #2in putative auxin-resonsive element (AUXRE) E1of soybean (G.m.) GH3promoter; Strong binding site for proteins in plant nuclear extracts; Hex-like element; E1element=-249 to -203; E2element=-241to -224; Called G-box by Liu et al. (1997);  
XBP1binding site-like sequence found in the plant UPRE (unfolded protein response element) in A.t.; See S000428; Either of ERSEII or XBP1binding sites is essential and sufficient for the UPR; See S000425 (CCACGTCA), S000426; C-box according to the nomenclature of ACGT elements by Foster et al. (FASEB J 8:192-200 (1994)); One of ACGT elements; Factors groups 1, 2and 3have affinity for C-box (Izawa et al. J Mol Biol. 230:1131-1144 (1993)); RITA-1binding site (Izawa et al. 1994);  
TGA-box #2in putative auxin-resonsive element (AUXRE) E1of soybean (G.m.) GH3promoter; Strong binding site for proteins in plant nuclear extracts; Hex-like element; E1element=-249 to -203; E2element=-241to -224; Called G-box by Liu et al. (1997);  
XBP1binding site-like sequence found in the plant UPRE (unfolded protein response element) in A.t.; See S000428; Either of ERSEII or XBP1binding sites is essential and sufficient for the UPR; See S000425 (CCACGTCA), S000426; C-box according to the nomenclature of ACGT elements by Foster et al. (FASEB J 8:192-200 (1994)); One of ACGT elements; Factors groups 1, 2and 3have affinity for C-box (Izawa et al. J Mol Biol. 230:1131-1144 (1993)); RITA-1binding site (Izawa et al. 1994);  
XBP1binding site-like sequence found in the plant UPRE (unfolded protein response element) in A.t.; See S000428; Either of ERSEII or XBP1binding sites is essential and sufficient for the UPR; See S000425 (CCACGTCA), S000426; XBP1binding site-like sequence found in the plant UPRE (unfolded protein response element) in A.t.; See S000428; Either of ERSEII or XBP1binding sites is essential and sufficient for the UPR; See S000425 (CCACGTCA), S000426; Sucrose Responsive Element (SURE); A motif conserved among genes regulated by sucrose; See also SURE2STPAT21(S000185); Found between -184 and -156 bp in the patatin (a major tuber protein) gene promoter of potato (S.t.);  
Sucrose Responsive Element (SURE); A motif conserved among genes regulated by sucrose; See also SURE2STPAT21(S000185); Found between -184 and -156 bp in the patatin (a major tuber protein) gene promoter of potato (S.t.);  
Sucrose Responsive Element (SURE); A motif conserved among genes regulated by sucrose; See also SURE2STPAT21(S000185); Found between -184 and -156 bp in the patatin (a major tuber protein) gene promoter of potato (S.t.);  
Sucrose Responsive Element (SURE); A motif conserved among genes regulated by sucrose; See also SURE2STPAT21(S000185); Found between -184 and -156 bp in the patatin (a major tuber protein) gene promoter of potato (S.t.);  
Up2motif found in 193of the 1184 up-regulated genes after main stem decapitation in Arabidopsis; W=A/T; See also S000470, S000471;  
Up2motif found in 193of the 1184 up-regulated genes after main stem decapitation in Arabidopsis; W=A/T; See also S000470, S000471;



|    |        |      |     |            |            |            |       |     |       |    |            |                  |                                                                                                                                                                                                                                                                                                                                                                                                                                                                                                                          |
|----|--------|------|-----|------------|------------|------------|-------|-----|-------|----|------------|------------------|--------------------------------------------------------------------------------------------------------------------------------------------------------------------------------------------------------------------------------------------------------------------------------------------------------------------------------------------------------------------------------------------------------------------------------------------------------------------------------------------------------------------------|
| RT | RT1091 | 1091 | CC2 | ATATT      | 1.16E-05   | 7.50E-06   | 42751 | 124 | 6189  | 2  | 0.00013889 | ROOTMOTIFTAPOX1  | pollen specific expression; Also found in the promoter of tomato endo-beta-mannanase gene (LeMAN5) gene (Filichkin et al. 2004);                                                                                                                                                                                                                                                                                                                                                                                         |
| RT | RT1091 | 1091 | CC2 | ATATTTAWW  | 1.92E-05   | 1.19E-05   | 21305 | 79  | 27635 | 47 | 0.00013889 | SEF1MOTIF        | Motif found both in promoters of rolD; SEF1(soybean embryo factor 1) binding motif; sequence found in 5'-upstream region (-640; -765) of soybean beta-conglitin (7S globulin) gene; W=A/T; GT-1motif found in the promoter of soybean (Glycine max) CaM isoform, SCaM-4; Plays a role in pathogen- and salt-induced SCaM-4 gene expression; See also S000198 (GT-1consensus);                                                                                                                                            |
| RT | RT1091 | 1091 | CC2 | GAAAAA     | 2.69E-05   | 1.30E-05   | 41531 | 122 | 7409  | 4  | 0.00013889 | GT1GMSCAM4       | EEC; Consensus motif of the two enhancer elements, EE-1and EE-2, both found in the promoter region of the Chlamydomonas Cah1(encoding a periplasmic carbonic anhydrase); Binding site of Myb transcription factor LCR1(see Yoshioka et al, 2004); N=A/G/C/T; I box; "I-box"; Conserved sequence upstream of light-regulated genes; Conserved sequence upstream of light-regulated genes of both monocots and dicots; See IBOX (S000124);                                                                                 |
| RT | RT1091 | 1091 | CC2 | GANTTNC    | 6.05E-05   | 3.12E-05   | 39448 | 118 | 9492  | 8  | 0.00013889 | EECCRCAH1        | one of "Sequences Over-Represented in Light-Induced Promoters (SORLIPs) in Arabidopsis; Computationally identified phyA-induced motifs; See also S000482, S000484, S000485, S000486 (all SORLIPs), and also S000487, S000488, S000489, S000490 (all SORLREPs);                                                                                                                                                                                                                                                           |
| RT | RT1091 | 1091 | CC2 | GATAA      | 8.70E-05   | 4.99E-05   | 42095 | 122 | 6845  | 4  | 0.00013889 | IBOXCORE         | Consensus GT-1binding site in many light-regulated genes, e.g., RBCS from many species, PHYA from oat and rice, spinach RCA and PETA, and bean CHS15; R=A/G; W=A/T; For a compilation of related GT elements and factors, see Villain et al. (1996); GT-1can stabilize the TFIIA-TBP-DNA (TATA box) complex; The activation mechanism of GT-1may be achieved through direct interaction between TFIIA and GT-1; Binding of GT-1-like factors to the PR-1a promoter influences the level of SA-inducible gene expression; |
| RT | RT1091 | 1091 | CC2 | GGGCC      | 0.00014449 | 9.11E-05   | 18545 | 69  | 30395 | 57 | 0.00013889 | SORLIP2AT        | Plant MYB binding site; Consensus sequence related to box P in promoters of phenylpropanoid biosynthetic genes such as PAL, CHS, CHI, DFR, CL, Bz1; Myb305; M=A/C; W=A/T; See S000355; The AmMYB308 and AmMYB330 transcription factors from Antirrhinum majus regulate phenylpropanoid and lignin biosynthesis in transgenic tobacco;                                                                                                                                                                                    |
| RT | RT1091 | 1091 | CC2 | GRWAAW     | 6.28E-05   | 2.70E-05   | 43250 | 124 | 5690  | 2  | 0.00013889 | GT1CONSENSUS     | SEF4 binding site; Soybean (G.m.) consensus sequence found in 5'upstream region (-199) of beta-conglycinin (7S globulin) gene (Gmg17.1); "Binding with SEF4 (soybean embryo factor 4)"; R=A/G;                                                                                                                                                                                                                                                                                                                           |
| RT | RT1091 | 1091 | CC2 | MACCWAMC   | 6.08E-05   | 4.10E-05   | 16325 | 64  | 32615 | 62 | 0.00013889 | MYBPLANT         | Core element in LeCp (tomato Cys protease) binding cis-element (from -715 to -675) in LeAcs2gene;                                                                                                                                                                                                                                                                                                                                                                                                                        |
| RT | RT1091 | 1091 | CC2 | RGATY      | 6.04E-05   | 0.00003793 | 43385 | 124 | 5555  | 2  | 0.00013889 |                  | TATA box; TATA box found in the 5'upstream region of sweet potato sporamin A gene;                                                                                                                                                                                                                                                                                                                                                                                                                                       |
| RT | RT1091 | 1091 | CC2 | RTTTTTR    | 0.00001836 | 7.90E-06   | 41327 | 122 | 7613  | 4  | 0.00013889 | SEF4MOTIFGM7S    | Site II element found in the promoter regions of cytochrome genes (CytC-1, CytC-2) in Arabidopsis; Located between -147 and -156 from the translational starts sites (Welchen et al., 2005); Y=C/T; See also S000308; Overrepresented in the promoters of nuclear genes encoding components of the oxidative phosphorylation (OxPhos) machinery from both Arabidopsis and rice (Welchen and Gonzalez, 2006);                                                                                                             |
| RT | RT1091 | 1091 | CC2 | TAAATAT    | 0.00003999 | 0.00002787 | 20190 | 75  | 28750 | 51 | 0.00013889 | LECPLEACS2       | TATA box; TATA box found in the 5'upstream region of pea (Pisum sativum) glutamine synthetase gene; a functional TATA element by in vivo analysis;                                                                                                                                                                                                                                                                                                                                                                       |
| RT | RT1091 | 1091 | CC2 | TATTAAT    | 0.00016319 | 0.00010635 | 25224 | 86  | 23716 | 40 | 0.00013889 | TATABOX3         | T-Box; Motif found in SAR (scaffold attachment region; or matrix attachment region, MAR);                                                                                                                                                                                                                                                                                                                                                                                                                                |
| RT | RT1091 | 1091 | CC2 | TGGGCY     | 0.00013619 | 8.98E-05   | 20795 | 75  | 28145 | 51 | 0.00013889 | SITEIIATCYTC     | Sequence found in Arabidopsis (A.t.) acyl carrier protein (ACP), Acl1.2, gene promoter; Contains bZIP core motif (ACGT);                                                                                                                                                                                                                                                                                                                                                                                                 |
| RT | RT1091 | 1091 | CC2 | TTATTT     | 3.96E-05   | 2.15E-05   | 41739 | 122 | 7201  | 4  | 0.00013889 | TATABOX5         | PolyA signal; poly A signal found in legA gene of pea, rice alpha-amylase; -10                                                                                                                                                                                                                                                                                                                                                                                                                                           |
| RT | RT1091 | 1091 | CC2 | TTWTWTTWTT | 4.43E-07   | 2.24E-07   | 35060 | 114 | 13880 | 12 | 0.00013889 | MARTBOX          |                                                                                                                                                                                                                                                                                                                                                                                                                                                                                                                          |
| RT | RT1092 | 1092 | CC1 | AAGACGTAG  | 4.99E-05   | 4.99E-05   | 101   | 4   | 48872 | 89 | 0.00013889 | AAGACGTAGATACL12 |                                                                                                                                                                                                                                                                                                                                                                                                                                                                                                                          |
| RT | RT1092 | 1092 | CC2 | AATAAA     | 2.96E-06   | 1.67E-06   | 41695 | 141 | 7226  | 4  | 0.00013889 | POLASIG1         |                                                                                                                                                                                                                                                                                                                                                                                                                                                                                                                          |

|    |        |      |     |           |           |          |       |     |       |    |            |                 |                                                                                                                                                                                                                                                                                                                                                                                                                                                                                                                                                                                                                                                                                                                                                                                                                                                                                                                                                                                                                                                                                                                                                                                                                                                                                                                                                                                                                                                                                                                                                                                                                                                                                                                                                                                                                                                                                                                                                                                                                                                                                                                                                                                                                                                                                                                                                                                                                                                                                                                                                                                                                                                                                                                                                                                                                                                                                                                                                                                                                                                                                                                                                                                                                                                                                                                                                                                                                                                                                                                        |
|----|--------|------|-----|-----------|-----------|----------|-------|-----|-------|----|------------|-----------------|------------------------------------------------------------------------------------------------------------------------------------------------------------------------------------------------------------------------------------------------------------------------------------------------------------------------------------------------------------------------------------------------------------------------------------------------------------------------------------------------------------------------------------------------------------------------------------------------------------------------------------------------------------------------------------------------------------------------------------------------------------------------------------------------------------------------------------------------------------------------------------------------------------------------------------------------------------------------------------------------------------------------------------------------------------------------------------------------------------------------------------------------------------------------------------------------------------------------------------------------------------------------------------------------------------------------------------------------------------------------------------------------------------------------------------------------------------------------------------------------------------------------------------------------------------------------------------------------------------------------------------------------------------------------------------------------------------------------------------------------------------------------------------------------------------------------------------------------------------------------------------------------------------------------------------------------------------------------------------------------------------------------------------------------------------------------------------------------------------------------------------------------------------------------------------------------------------------------------------------------------------------------------------------------------------------------------------------------------------------------------------------------------------------------------------------------------------------------------------------------------------------------------------------------------------------------------------------------------------------------------------------------------------------------------------------------------------------------------------------------------------------------------------------------------------------------------------------------------------------------------------------------------------------------------------------------------------------------------------------------------------------------------------------------------------------------------------------------------------------------------------------------------------------------------------------------------------------------------------------------------------------------------------------------------------------------------------------------------------------------------------------------------------------------------------------------------------------------------------------------------------------------|
| RT | RT1092 | 1092 | CC2 | AATAAT    | 2.80E-07  | 1.59E-07 | 40278 | 140 | 8643  | 5  | 0.00013889 | POLASIG3        | <p>to -30 in the case of animal genes. Near upstream elements (NUE) in Arabidopsis (Loke et al. 2005);</p> <p>Plant polyA signal; Consensus sequence for plant polyadenylation signal; PolyA signal; poly A signal found in rice alpha-amylase; -10 to -30 in the case of animal genes. AATAAAA; AATAAT; AATTAAA; AATAAG;</p> <p>One of two co-dependent regulatory elements responsible for pollen specific activation of tomato (L.e.) lat52gene; Found at -72to -68 region; See S000246 (POLLEN2LELAT52); AGAAA and TCCACCATA (S000246) are required for pollen specific expression; Also found in the promoter of tomato endo-beta-mannanase gene (LeMAN5) gene (Filichkin et al. 2004);</p> <p>Motif found both in promoters of rolD;</p> <p>SEF1(soybean embryo factor 1) binding motif; sequence found in 5'-upstream region (-640; -765) of soybean beta-conglicinin (7S globulin) gene; W=A/T; Binding consensus sequence of Arabidopsis (A.t.) transcription factor, RAV1; RAV1specifically binds to DNA with bipartite sequence motifs of RAV1-A (CAACA) and RAV1-B (CACCTG); RAV1protein contain AP2-like and B3-like domains; The AP2-like and B3-like domains recognize the CAACA and CACCTG motifs, respectively; The expression level of RAV1were relatively high in rosette leaves and roots; See S000315(CACCTG);</p> <p>MYC recognition site found in the promoters of the dehydration-responsive gene rd22and many other genes in Arabidopsis; Binding site of ATMYC2(previously known as rd22BP1); see S000144 (E-box; CANNTG), S000174 (MYCATRD22); N=A/T/G/C; MYC recognition sequence in CBF3promoter; Binding site of ICE1(inducer of CBF expression 1) that regulates the transcription of CBF/DREB1genes in the cold in Arabidopsis; ICE1(Chinnusamy et al., 2004);) This sequence is also known as RRE (R response element)(Hartmann et al., 2005);</p> <p>One of the consensus sequence motifs of organ-specific elements (OSE) characteristic of the promoters activated in infected cells of root nodules; See also S000467;</p> <p>GT-1motif found in the promoter of soybean (Glycine max) CaM isoform, SCaM-4; Plays a role in pathogen- and salt-induced SCaM-4 gene expression; See also S000198 (GT-1consensus);</p> <p>EEC; Consensus motif of the two enhancer elements, EE-1and EE-2, both found in the promoter region of the Chlamydomonas Cah1(encoding a periplasmic carbonic anhydrase); Binding site of Myb transcription factor LCR1(see Yoshioka et al, 2004); N=A/G/C/T;</p> <p>I box; "I-box"; Conserved sequence upstream of light-regulated genes; Conserved sequence upstream of light-regulated genes of both monocots and dicots; See IBOX (S000124);</p> <p>one of "Sequences Over-Represented in Light-Induced Promoters (SORLIPs) in Arabidopsis; Computationally identified phyA-induced motifs; See also S000482, S000484, S000485, S000486 (all SORLIPs), and also S000487, S000488, S000489, S000490 (all SORLREPs);</p> <p>Consensus GT-1binding site in many light-regulated genes, e.g., RBCS from many species, PHYA from oat and rice, spinach RCA and PETA, and bean CHS15; R=A/G; W=A/T; For a compilation of related GT elements and factors, see Villain et al. (1996); GT-1can stabilize the TFIIA-TBP-DNA (TATA box) complex; The activation mechanism of GT-1may be achieved through direct interaction between TFIIA and GT-1; Binding of GT-1-like factors to the PR-1a promoter influences the level of SA-inducible gene expression;</p> |
| RT | RT1092 | 1092 | CC2 | AATTAAA   | 3.40E-05  | 1.99E-05 | 34503 | 124 | 14418 | 21 | 0.00013889 | POLASIG2        |                                                                                                                                                                                                                                                                                                                                                                                                                                                                                                                                                                                                                                                                                                                                                                                                                                                                                                                                                                                                                                                                                                                                                                                                                                                                                                                                                                                                                                                                                                                                                                                                                                                                                                                                                                                                                                                                                                                                                                                                                                                                                                                                                                                                                                                                                                                                                                                                                                                                                                                                                                                                                                                                                                                                                                                                                                                                                                                                                                                                                                                                                                                                                                                                                                                                                                                                                                                                                                                                                                                        |
| RT | RT1092 | 1092 | CC2 | AGAAA     | 3.98E-06  | 2.20E-06 | 43089 | 143 | 5832  | 2  | 0.00013889 | POLLEN1LELAT52  |                                                                                                                                                                                                                                                                                                                                                                                                                                                                                                                                                                                                                                                                                                                                                                                                                                                                                                                                                                                                                                                                                                                                                                                                                                                                                                                                                                                                                                                                                                                                                                                                                                                                                                                                                                                                                                                                                                                                                                                                                                                                                                                                                                                                                                                                                                                                                                                                                                                                                                                                                                                                                                                                                                                                                                                                                                                                                                                                                                                                                                                                                                                                                                                                                                                                                                                                                                                                                                                                                                                        |
| RT | RT1092 | 1092 | CC2 | ATATT     | 1.81E-06  | 7.50E-07 | 42732 | 143 | 6189  | 2  | 0.00013889 | ROOTMOTIFTAPOX1 |                                                                                                                                                                                                                                                                                                                                                                                                                                                                                                                                                                                                                                                                                                                                                                                                                                                                                                                                                                                                                                                                                                                                                                                                                                                                                                                                                                                                                                                                                                                                                                                                                                                                                                                                                                                                                                                                                                                                                                                                                                                                                                                                                                                                                                                                                                                                                                                                                                                                                                                                                                                                                                                                                                                                                                                                                                                                                                                                                                                                                                                                                                                                                                                                                                                                                                                                                                                                                                                                                                                        |
| RT | RT1092 | 1092 | CC2 | ATATTTAWW | 2.28E-05  | 1.19E-05 | 21295 | 89  | 27626 | 56 | 0.00013889 | SEF1MOTIF       |                                                                                                                                                                                                                                                                                                                                                                                                                                                                                                                                                                                                                                                                                                                                                                                                                                                                                                                                                                                                                                                                                                                                                                                                                                                                                                                                                                                                                                                                                                                                                                                                                                                                                                                                                                                                                                                                                                                                                                                                                                                                                                                                                                                                                                                                                                                                                                                                                                                                                                                                                                                                                                                                                                                                                                                                                                                                                                                                                                                                                                                                                                                                                                                                                                                                                                                                                                                                                                                                                                                        |
| RT | RT1092 | 1092 | CC2 | CAACA     | 2.46E-05  | 1.49E-05 | 41903 | 140 | 7018  | 5  | 0.00013889 | RAV1AAT         |                                                                                                                                                                                                                                                                                                                                                                                                                                                                                                                                                                                                                                                                                                                                                                                                                                                                                                                                                                                                                                                                                                                                                                                                                                                                                                                                                                                                                                                                                                                                                                                                                                                                                                                                                                                                                                                                                                                                                                                                                                                                                                                                                                                                                                                                                                                                                                                                                                                                                                                                                                                                                                                                                                                                                                                                                                                                                                                                                                                                                                                                                                                                                                                                                                                                                                                                                                                                                                                                                                                        |
| RT | RT1092 | 1092 | CC2 | CANNTG    | 3.26E-05  | 1.99E-05 | 42586 | 141 | 6335  | 4  | 0.00013889 | MYCCONSENSUSAT  |                                                                                                                                                                                                                                                                                                                                                                                                                                                                                                                                                                                                                                                                                                                                                                                                                                                                                                                                                                                                                                                                                                                                                                                                                                                                                                                                                                                                                                                                                                                                                                                                                                                                                                                                                                                                                                                                                                                                                                                                                                                                                                                                                                                                                                                                                                                                                                                                                                                                                                                                                                                                                                                                                                                                                                                                                                                                                                                                                                                                                                                                                                                                                                                                                                                                                                                                                                                                                                                                                                                        |
| RT | RT1092 | 1092 | CC2 | CTCTT     | 3.61E-05  | 1.91E-05 | 41997 | 140 | 6924  | 5  | 0.00013889 | OSE2ROOTNODULE  |                                                                                                                                                                                                                                                                                                                                                                                                                                                                                                                                                                                                                                                                                                                                                                                                                                                                                                                                                                                                                                                                                                                                                                                                                                                                                                                                                                                                                                                                                                                                                                                                                                                                                                                                                                                                                                                                                                                                                                                                                                                                                                                                                                                                                                                                                                                                                                                                                                                                                                                                                                                                                                                                                                                                                                                                                                                                                                                                                                                                                                                                                                                                                                                                                                                                                                                                                                                                                                                                                                                        |
| RT | RT1092 | 1092 | CC2 | GAAAAA    | 1.98E-06  | 9.87E-07 | 41512 | 141 | 7409  | 4  | 0.00013889 | GT1GMSCAM4      |                                                                                                                                                                                                                                                                                                                                                                                                                                                                                                                                                                                                                                                                                                                                                                                                                                                                                                                                                                                                                                                                                                                                                                                                                                                                                                                                                                                                                                                                                                                                                                                                                                                                                                                                                                                                                                                                                                                                                                                                                                                                                                                                                                                                                                                                                                                                                                                                                                                                                                                                                                                                                                                                                                                                                                                                                                                                                                                                                                                                                                                                                                                                                                                                                                                                                                                                                                                                                                                                                                                        |
| RT | RT1092 | 1092 | CC2 | GANTTNC   | 3.34E-05  | 2.04E-05 | 39431 | 135 | 9490  | 10 | 0.00013889 | EECCRCAH1       |                                                                                                                                                                                                                                                                                                                                                                                                                                                                                                                                                                                                                                                                                                                                                                                                                                                                                                                                                                                                                                                                                                                                                                                                                                                                                                                                                                                                                                                                                                                                                                                                                                                                                                                                                                                                                                                                                                                                                                                                                                                                                                                                                                                                                                                                                                                                                                                                                                                                                                                                                                                                                                                                                                                                                                                                                                                                                                                                                                                                                                                                                                                                                                                                                                                                                                                                                                                                                                                                                                                        |
| RT | RT1092 | 1092 | CC2 | GATAA     | 0.0000544 | 2.36E-05 | 42077 | 140 | 6844  | 5  | 0.00013889 | IBOXCORE        |                                                                                                                                                                                                                                                                                                                                                                                                                                                                                                                                                                                                                                                                                                                                                                                                                                                                                                                                                                                                                                                                                                                                                                                                                                                                                                                                                                                                                                                                                                                                                                                                                                                                                                                                                                                                                                                                                                                                                                                                                                                                                                                                                                                                                                                                                                                                                                                                                                                                                                                                                                                                                                                                                                                                                                                                                                                                                                                                                                                                                                                                                                                                                                                                                                                                                                                                                                                                                                                                                                                        |
| RT | RT1092 | 1092 | CC2 | GGGCC     | 2.83E-06  | 1.85E-06 | 18531 | 83  | 30390 | 62 | 0.00013889 | SORLIP2AT       |                                                                                                                                                                                                                                                                                                                                                                                                                                                                                                                                                                                                                                                                                                                                                                                                                                                                                                                                                                                                                                                                                                                                                                                                                                                                                                                                                                                                                                                                                                                                                                                                                                                                                                                                                                                                                                                                                                                                                                                                                                                                                                                                                                                                                                                                                                                                                                                                                                                                                                                                                                                                                                                                                                                                                                                                                                                                                                                                                                                                                                                                                                                                                                                                                                                                                                                                                                                                                                                                                                                        |
| RT | RT1092 | 1092 | CC2 | GRWAAW    | 6.04E-06  | 3.36E-06 | 43231 | 143 | 5690  | 2  | 0.00013889 | GT1CONSENSUS    |                                                                                                                                                                                                                                                                                                                                                                                                                                                                                                                                                                                                                                                                                                                                                                                                                                                                                                                                                                                                                                                                                                                                                                                                                                                                                                                                                                                                                                                                                                                                                                                                                                                                                                                                                                                                                                                                                                                                                                                                                                                                                                                                                                                                                                                                                                                                                                                                                                                                                                                                                                                                                                                                                                                                                                                                                                                                                                                                                                                                                                                                                                                                                                                                                                                                                                                                                                                                                                                                                                                        |
| RT | RT1092 | 1092 | CC2 | RGATY     | 9.13E-06  | 5.01E-06 | 43366 | 143 | 5555  | 2  | 0.00013889 |                 |                                                                                                                                                                                                                                                                                                                                                                                                                                                                                                                                                                                                                                                                                                                                                                                                                                                                                                                                                                                                                                                                                                                                                                                                                                                                                                                                                                                                                                                                                                                                                                                                                                                                                                                                                                                                                                                                                                                                                                                                                                                                                                                                                                                                                                                                                                                                                                                                                                                                                                                                                                                                                                                                                                                                                                                                                                                                                                                                                                                                                                                                                                                                                                                                                                                                                                                                                                                                                                                                                                                        |

|    |        |      |     |            |            |            |       |     |       |    |            |                   |                                                                                                                                                                                                                                                                                                                                                                                                                                                                                                                                                                                                                                                                                                                                                                                                                                                                                                                                                                                                                                                                                                                                                                                                                                                                                                                                                                                                                                                                                                                                                                                                                                                                                                                                                                                                                                                                                                                                                                                                                                                                                                                                                                                                                                                                                                                                                                                                                                                                                                                                                                                                                                                                                                                                                                                                                                                                                                                                                                                                                                                                                                                                                                                                                                                                                                                                                                                                         |
|----|--------|------|-----|------------|------------|------------|-------|-----|-------|----|------------|-------------------|---------------------------------------------------------------------------------------------------------------------------------------------------------------------------------------------------------------------------------------------------------------------------------------------------------------------------------------------------------------------------------------------------------------------------------------------------------------------------------------------------------------------------------------------------------------------------------------------------------------------------------------------------------------------------------------------------------------------------------------------------------------------------------------------------------------------------------------------------------------------------------------------------------------------------------------------------------------------------------------------------------------------------------------------------------------------------------------------------------------------------------------------------------------------------------------------------------------------------------------------------------------------------------------------------------------------------------------------------------------------------------------------------------------------------------------------------------------------------------------------------------------------------------------------------------------------------------------------------------------------------------------------------------------------------------------------------------------------------------------------------------------------------------------------------------------------------------------------------------------------------------------------------------------------------------------------------------------------------------------------------------------------------------------------------------------------------------------------------------------------------------------------------------------------------------------------------------------------------------------------------------------------------------------------------------------------------------------------------------------------------------------------------------------------------------------------------------------------------------------------------------------------------------------------------------------------------------------------------------------------------------------------------------------------------------------------------------------------------------------------------------------------------------------------------------------------------------------------------------------------------------------------------------------------------------------------------------------------------------------------------------------------------------------------------------------------------------------------------------------------------------------------------------------------------------------------------------------------------------------------------------------------------------------------------------------------------------------------------------------------------------------------------------|
| RT | RT1092 | 1092 | CC2 | RTTTTTR    | 8.60E-07   | 5.47E-07   | 41308 | 141 | 7613  | 4  | 0.00013889 | SEF4MOTIFGM7S     | SEF4 binding site; Soybean (G.m.) consensus sequence found in 5'upstream region (-199) of beta-conglycinin (7S globulin) gene (Gmg17.1); "Binding with SEF4 (soybean embryo factor 4)"; R=A/G; Core element in LeCp (tomato Cys protease) binding cis-element (from -715 to -675) in LeAcs2gene; TAAAG motif found in promoter of Solanum tuberosum (S.t.) KST1gene; Target site for trans-acting StDof1protein controlling guard cell-specific gene expression; KST1gene encodes a K+ influx channel of guard cells; See S000265; TATA box; TATA box found in the 5'upstream region of sweet potato sporamin A gene; Site II element found in the promoter regions of cytochrome genes (Cytc-1, Cytc-2) in Arabidopsis; Located between -147 and -156 from the translational starts sites (Welchen et al., 2005); Y=C/T; See also S000308; Overrepresented in the promoters of nuclear genes encoding components of the oxidative phosphorylation (OxPhos) machinery from both Arabidopsis and rice (Welchen and Gonzalez, 2006);) TATA box; TATA box found in the 5'upstream region of pea (Pisum sativum) glutamine synthetase gene; a functional TATA element by in vivo analysis; T-Box; Motif found in SAR (scaffold attachment region; or matrix attachment region, MAR); Sequence found in Arabidopsis (A.t.) acyl carrier protein (ACP), Acl1.2, gene promoter; Contains bZIP core motif (ACGT); PolyA signal; poly A signal found in legA gene of pea, rice alpha-amylase; -10 to -30 in the case of animal genes. Near upstream elements (NUE) in Arabidopsis (Loke et al. 2005); Plant polyA signal; Consensus sequence for plant polyadenylation signal; PolyA signal; poly A signal found in rice alpha-amylase; -10 to -30 in the case of animal genes. AATAAA; AATAAT; AATTAAA; AATAAG; One of two co-dependent regulatory elements responsible for pollen specific activation of tomato (L.e.) lat52gene; Found at -72to -68 region; See S000246 (POLLEN2LELAT52); AGAAA and TCCACCATA (S000246) are required for pollen specific expression; Also found in the promoter of tomato endo-beta-mannanase gene (LeMAN5) gene (Filichkin et al. 2004); Motif found both in promoters of rolD; SEF1(soybean embryo factor 1) binding motif; sequence found in 5'-upstream region (-640; -765) of soybean beta-conglycinin (7S globulin) gene; W=A/T; Binding consensus sequence of Arabidopsis (A.t.) transcription factor, RAV1; RAV1specifically binds to DNA with bipartite sequence motifs of RAV1-A (CAACA) and RAV1-B (CACCTG); RAV1protein contain AP2-like and B3-like domains; The AP2-like and B3-like domains recognize the CAACA and CACCTG motifs, respectively; The expression level of RAV1were relatively high in rosette leaves and roots; See S000315(CACCTG); MYC recognition site found in the promoters of the dehydration-responsive gene rd22and many other genes in Arabidopsis; Binding site of ATMYC2(previously known as rd22BP1); see S000144 (E-box; CANNTG), S000174 (MYCATRD22); N=A/T/G/C; MYC recognition sequence in CBF3promoter; Binding site of ICE1(inducer of CBF expression 1) that regulates the transcription of CBF/DREB1genes in the cold in Arabidopsis; ICE1(Chinnusamy et al., 2004);) This sequence is also known as RRE (R response element)(Hartmann et al., 2005); One of the consensus sequence motifs of organ-specific elements (OSE) |
| RT | RT1092 | 1092 | CC2 | TAAAAATAT  | 0.00012871 | 7.72E-05   | 20182 | 83  | 28739 | 62 | 0.00013889 | LECPLEACS2        |                                                                                                                                                                                                                                                                                                                                                                                                                                                                                                                                                                                                                                                                                                                                                                                                                                                                                                                                                                                                                                                                                                                                                                                                                                                                                                                                                                                                                                                                                                                                                                                                                                                                                                                                                                                                                                                                                                                                                                                                                                                                                                                                                                                                                                                                                                                                                                                                                                                                                                                                                                                                                                                                                                                                                                                                                                                                                                                                                                                                                                                                                                                                                                                                                                                                                                                                                                                                         |
| RT | RT1092 | 1092 | CC2 | TAAAG      | 0.00024289 | 0.00010867 | 42134 | 139 | 6787  | 6  | 0.00013889 | TAAAGSTKST1       |                                                                                                                                                                                                                                                                                                                                                                                                                                                                                                                                                                                                                                                                                                                                                                                                                                                                                                                                                                                                                                                                                                                                                                                                                                                                                                                                                                                                                                                                                                                                                                                                                                                                                                                                                                                                                                                                                                                                                                                                                                                                                                                                                                                                                                                                                                                                                                                                                                                                                                                                                                                                                                                                                                                                                                                                                                                                                                                                                                                                                                                                                                                                                                                                                                                                                                                                                                                                         |
| RT | RT1092 | 1092 | CC2 | TATTAAT    | 1.24E-05   | 7.18E-06   | 25209 | 101 | 23712 | 44 | 0.00013889 | TATABOX3          |                                                                                                                                                                                                                                                                                                                                                                                                                                                                                                                                                                                                                                                                                                                                                                                                                                                                                                                                                                                                                                                                                                                                                                                                                                                                                                                                                                                                                                                                                                                                                                                                                                                                                                                                                                                                                                                                                                                                                                                                                                                                                                                                                                                                                                                                                                                                                                                                                                                                                                                                                                                                                                                                                                                                                                                                                                                                                                                                                                                                                                                                                                                                                                                                                                                                                                                                                                                                         |
| RT | RT1092 | 1092 | CC2 | TGGGCY     | 6.52E-06   | 3.69E-06   | 20781 | 89  | 28140 | 56 | 0.00013889 | SITEIIATCYTC      |                                                                                                                                                                                                                                                                                                                                                                                                                                                                                                                                                                                                                                                                                                                                                                                                                                                                                                                                                                                                                                                                                                                                                                                                                                                                                                                                                                                                                                                                                                                                                                                                                                                                                                                                                                                                                                                                                                                                                                                                                                                                                                                                                                                                                                                                                                                                                                                                                                                                                                                                                                                                                                                                                                                                                                                                                                                                                                                                                                                                                                                                                                                                                                                                                                                                                                                                                                                                         |
| RT | RT1092 | 1092 | CC2 | TTATTT     | 2.97E-06   | 0.00000179 | 41720 | 141 | 7201  | 4  | 0.00013889 | TATABOX5          |                                                                                                                                                                                                                                                                                                                                                                                                                                                                                                                                                                                                                                                                                                                                                                                                                                                                                                                                                                                                                                                                                                                                                                                                                                                                                                                                                                                                                                                                                                                                                                                                                                                                                                                                                                                                                                                                                                                                                                                                                                                                                                                                                                                                                                                                                                                                                                                                                                                                                                                                                                                                                                                                                                                                                                                                                                                                                                                                                                                                                                                                                                                                                                                                                                                                                                                                                                                                         |
| RT | RT1092 | 1092 | CC2 | TTWTWTTWTT | 6.87E-07   | 4.12E-07   | 35045 | 129 | 13876 | 16 | 0.00013889 | MARTBOX           |                                                                                                                                                                                                                                                                                                                                                                                                                                                                                                                                                                                                                                                                                                                                                                                                                                                                                                                                                                                                                                                                                                                                                                                                                                                                                                                                                                                                                                                                                                                                                                                                                                                                                                                                                                                                                                                                                                                                                                                                                                                                                                                                                                                                                                                                                                                                                                                                                                                                                                                                                                                                                                                                                                                                                                                                                                                                                                                                                                                                                                                                                                                                                                                                                                                                                                                                                                                                         |
| RT | RT1093 | 1093 | CC1 | AAGACGTAG  | 5.43E-05   | 5.43E-05   | 101   | 4   | 48870 | 91 | 0.00013889 | AAGACGTAGATAACL12 |                                                                                                                                                                                                                                                                                                                                                                                                                                                                                                                                                                                                                                                                                                                                                                                                                                                                                                                                                                                                                                                                                                                                                                                                                                                                                                                                                                                                                                                                                                                                                                                                                                                                                                                                                                                                                                                                                                                                                                                                                                                                                                                                                                                                                                                                                                                                                                                                                                                                                                                                                                                                                                                                                                                                                                                                                                                                                                                                                                                                                                                                                                                                                                                                                                                                                                                                                                                                         |
| RT | RT1093 | 1093 | CC2 | AATAAA     | 2.05E-06   | 1.12E-06   | 41692 | 144 | 7226  | 4  | 0.00013889 | POLASIG1          |                                                                                                                                                                                                                                                                                                                                                                                                                                                                                                                                                                                                                                                                                                                                                                                                                                                                                                                                                                                                                                                                                                                                                                                                                                                                                                                                                                                                                                                                                                                                                                                                                                                                                                                                                                                                                                                                                                                                                                                                                                                                                                                                                                                                                                                                                                                                                                                                                                                                                                                                                                                                                                                                                                                                                                                                                                                                                                                                                                                                                                                                                                                                                                                                                                                                                                                                                                                                         |
| RT | RT1093 | 1093 | CC2 | AATAAT     | 1.95E-07   | 9.82E-08   | 40275 | 143 | 8643  | 5  | 0.00013889 | POLASIG3          |                                                                                                                                                                                                                                                                                                                                                                                                                                                                                                                                                                                                                                                                                                                                                                                                                                                                                                                                                                                                                                                                                                                                                                                                                                                                                                                                                                                                                                                                                                                                                                                                                                                                                                                                                                                                                                                                                                                                                                                                                                                                                                                                                                                                                                                                                                                                                                                                                                                                                                                                                                                                                                                                                                                                                                                                                                                                                                                                                                                                                                                                                                                                                                                                                                                                                                                                                                                                         |
| RT | RT1093 | 1093 | CC2 | AATTAAA    | 4.27E-05   | 2.72E-05   | 34501 | 126 | 14417 | 22 | 0.00013889 | POLASIG2          |                                                                                                                                                                                                                                                                                                                                                                                                                                                                                                                                                                                                                                                                                                                                                                                                                                                                                                                                                                                                                                                                                                                                                                                                                                                                                                                                                                                                                                                                                                                                                                                                                                                                                                                                                                                                                                                                                                                                                                                                                                                                                                                                                                                                                                                                                                                                                                                                                                                                                                                                                                                                                                                                                                                                                                                                                                                                                                                                                                                                                                                                                                                                                                                                                                                                                                                                                                                                         |
| RT | RT1093 | 1093 | CC2 | AGAAA      | 2.70E-06   | 1.56E-06   | 43086 | 146 | 5832  | 2  | 0.00013889 | POLLEN1LELAT52    |                                                                                                                                                                                                                                                                                                                                                                                                                                                                                                                                                                                                                                                                                                                                                                                                                                                                                                                                                                                                                                                                                                                                                                                                                                                                                                                                                                                                                                                                                                                                                                                                                                                                                                                                                                                                                                                                                                                                                                                                                                                                                                                                                                                                                                                                                                                                                                                                                                                                                                                                                                                                                                                                                                                                                                                                                                                                                                                                                                                                                                                                                                                                                                                                                                                                                                                                                                                                         |
| RT | RT1093 | 1093 | CC2 | ATATT      | 1.22E-06   | 5.20E-07   | 42729 | 146 | 6189  | 2  | 0.00013889 | ROOTMOTIFTAPOX1   |                                                                                                                                                                                                                                                                                                                                                                                                                                                                                                                                                                                                                                                                                                                                                                                                                                                                                                                                                                                                                                                                                                                                                                                                                                                                                                                                                                                                                                                                                                                                                                                                                                                                                                                                                                                                                                                                                                                                                                                                                                                                                                                                                                                                                                                                                                                                                                                                                                                                                                                                                                                                                                                                                                                                                                                                                                                                                                                                                                                                                                                                                                                                                                                                                                                                                                                                                                                                         |
| RT | RT1093 | 1093 | CC2 | ATATTTAWW  | 1.33E-05   | 8.66E-06   | 21293 | 91  | 27625 | 57 | 0.00013889 | SEF1MOTIF         |                                                                                                                                                                                                                                                                                                                                                                                                                                                                                                                                                                                                                                                                                                                                                                                                                                                                                                                                                                                                                                                                                                                                                                                                                                                                                                                                                                                                                                                                                                                                                                                                                                                                                                                                                                                                                                                                                                                                                                                                                                                                                                                                                                                                                                                                                                                                                                                                                                                                                                                                                                                                                                                                                                                                                                                                                                                                                                                                                                                                                                                                                                                                                                                                                                                                                                                                                                                                         |
| RT | RT1093 | 1093 | CC2 | CAACA      | 8.23E-05   | 4.34E-05   | 41901 | 142 | 7017  | 6  | 0.00013889 | RAV1AAT           |                                                                                                                                                                                                                                                                                                                                                                                                                                                                                                                                                                                                                                                                                                                                                                                                                                                                                                                                                                                                                                                                                                                                                                                                                                                                                                                                                                                                                                                                                                                                                                                                                                                                                                                                                                                                                                                                                                                                                                                                                                                                                                                                                                                                                                                                                                                                                                                                                                                                                                                                                                                                                                                                                                                                                                                                                                                                                                                                                                                                                                                                                                                                                                                                                                                                                                                                                                                                         |
| RT | RT1093 | 1093 | CC2 | CANNTG     | 2.27E-05   | 0.00001419 | 42583 | 144 | 6335  | 4  | 0.00013889 | MYCCONSENSUSAT    |                                                                                                                                                                                                                                                                                                                                                                                                                                                                                                                                                                                                                                                                                                                                                                                                                                                                                                                                                                                                                                                                                                                                                                                                                                                                                                                                                                                                                                                                                                                                                                                                                                                                                                                                                                                                                                                                                                                                                                                                                                                                                                                                                                                                                                                                                                                                                                                                                                                                                                                                                                                                                                                                                                                                                                                                                                                                                                                                                                                                                                                                                                                                                                                                                                                                                                                                                                                                         |
| RT | RT1093 | 1093 | CC2 | CTCTT      | 2.54E-05   | 1.33E-05   | 41994 | 143 | 6924  | 5  | 0.00013889 | OSE2ROOTNODULE    |                                                                                                                                                                                                                                                                                                                                                                                                                                                                                                                                                                                                                                                                                                                                                                                                                                                                                                                                                                                                                                                                                                                                                                                                                                                                                                                                                                                                                                                                                                                                                                                                                                                                                                                                                                                                                                                                                                                                                                                                                                                                                                                                                                                                                                                                                                                                                                                                                                                                                                                                                                                                                                                                                                                                                                                                                                                                                                                                                                                                                                                                                                                                                                                                                                                                                                                                                                                                         |

|    |        |      |     |            |            |           |       |     |       |    |            |                |                                                                                                                                                                                                                                                                                                                                                                                                                                                                                                                                                                                                                                                                                                                                                                                                                                                                                                                                                                                                                                                                                                                                                                                                                                                                                                                                                                                                                                                                                                                    |
|----|--------|------|-----|------------|------------|-----------|-------|-----|-------|----|------------|----------------|--------------------------------------------------------------------------------------------------------------------------------------------------------------------------------------------------------------------------------------------------------------------------------------------------------------------------------------------------------------------------------------------------------------------------------------------------------------------------------------------------------------------------------------------------------------------------------------------------------------------------------------------------------------------------------------------------------------------------------------------------------------------------------------------------------------------------------------------------------------------------------------------------------------------------------------------------------------------------------------------------------------------------------------------------------------------------------------------------------------------------------------------------------------------------------------------------------------------------------------------------------------------------------------------------------------------------------------------------------------------------------------------------------------------------------------------------------------------------------------------------------------------|
| RT | RT1093 | 1093 | CC2 | GAAAAA     | 1.38E-06   | 6.53E-07  | 41509 | 144 | 7409  | 4  | 0.00013889 | GT1GMSCAM4     | characteristic of the promoters activated in infected cells of root nodules; See also S000467; GT-1motif found in the promoter of soybean (Glycine max) CaM isoform, SCaM-4; Plays a role in pathogen- and salt-induced SCaM-4 gene expression; See also S000198 (GT-1consensus); EEC; Consensus motif of the two enhancer elements, EE-1and EE-2, both found in the promoter region of the Chlamydomonas Cah1(encoding a periplasmic carbonic anhydrase); Binding site of Myb transcription factor LCR1(see Yoshioka et al, 2004); N=A/G/C/T; I box; "I-box"; Conserved sequence upstream of light-regulated genes; Conserved sequence upstream of light-regulated genes of both monocots and dicots; See IBOX (S000124); one of "Sequences Over-Represented in Light-Induced Promoters (SORLIPs) in Arabidopsis; Computationally identified phyA-induced motifs; See also S000482, S000484, S000485, S000486 (all SORLIPs), and also S000487, S000488, S000489, S000490 (all SORLREPs); Consensus GT-1binding site in many light-regulated genes, e.g., RBCS from many species, PHYA from oat and rice, spinach RCA and PETA, and bean CHS15; R=A/G; W=A/T; For a compilation of related GT elements and factors, see Villain et al. (1996); GT-1can stabilize the TFIIA-TBP-DNA (TATA box) complex; The activation mechanism of GT-1may be achieved through direct interaction between TFIIA and GT-1; Binding of GT-1-like factors to the PR-1a promoter influences the level of SA-inducible gene expression; |
| RT | RT1093 | 1093 | CC2 | GANTTNC    | 2.40E-05   | 0.0000131 | 39428 | 138 | 9490  | 10 | 0.00013889 | EECCRCAH1      |                                                                                                                                                                                                                                                                                                                                                                                                                                                                                                                                                                                                                                                                                                                                                                                                                                                                                                                                                                                                                                                                                                                                                                                                                                                                                                                                                                                                                                                                                                                    |
| RT | RT1093 | 1093 | CC2 | GATAA      | 0.00003832 | 1.66E-05  | 42074 | 143 | 6844  | 5  | 0.00013889 | IBOXCORE       |                                                                                                                                                                                                                                                                                                                                                                                                                                                                                                                                                                                                                                                                                                                                                                                                                                                                                                                                                                                                                                                                                                                                                                                                                                                                                                                                                                                                                                                                                                                    |
| RT | RT1093 | 1093 | CC2 | GGGCC      | 3.76E-07   | 2.16E-07  | 18527 | 87  | 30391 | 61 | 0.00013889 | SORLIP2AT      |                                                                                                                                                                                                                                                                                                                                                                                                                                                                                                                                                                                                                                                                                                                                                                                                                                                                                                                                                                                                                                                                                                                                                                                                                                                                                                                                                                                                                                                                                                                    |
| RT | RT1093 | 1093 | CC2 | GRWAAW     | 4.09E-06   | 2.41E-06  | 43228 | 146 | 5690  | 2  | 0.00013889 | GT1CONSENSUS   |                                                                                                                                                                                                                                                                                                                                                                                                                                                                                                                                                                                                                                                                                                                                                                                                                                                                                                                                                                                                                                                                                                                                                                                                                                                                                                                                                                                                                                                                                                                    |
| RT | RT1093 | 1093 | CC2 | RGATY      | 6.19E-06   | 3.63E-06  | 43363 | 146 | 5555  | 2  | 0.00013889 |                |                                                                                                                                                                                                                                                                                                                                                                                                                                                                                                                                                                                                                                                                                                                                                                                                                                                                                                                                                                                                                                                                                                                                                                                                                                                                                                                                                                                                                                                                                                                    |
| RT | RT1093 | 1093 | CC2 | RTTTTTR    | 5.88E-07   | 3.56E-07  | 41305 | 144 | 7613  | 4  | 0.00013889 | SEF4MOTIFGM7S  | SEF4 binding site; Soybean (G.m.) consensus sequence found in 5'upstream region (-199) of beta-conglycinin (7S globulin) gene (Gmg17.1); "Binding with SEF4 (soybean embryo factor 4)"; R=A/G; TAAAG motif found in promoter of Solanum tuberosum (S.t.) KST1gene; Target site for trans-acting StDof1protein controlling guard cell-specific gene expression; KST1gene encodes a K+ influx channel of guard cells; See S000265;                                                                                                                                                                                                                                                                                                                                                                                                                                                                                                                                                                                                                                                                                                                                                                                                                                                                                                                                                                                                                                                                                   |
| RT | RT1093 | 1093 | CC2 | TAAAG      | 0.00017363 | 7.82E-05  | 42131 | 142 | 6787  | 6  | 0.00013889 | TAAAGSTKST1    | TATA box; TATA box found in the 5'upstream region of sweet potato sporamin A gene;                                                                                                                                                                                                                                                                                                                                                                                                                                                                                                                                                                                                                                                                                                                                                                                                                                                                                                                                                                                                                                                                                                                                                                                                                                                                                                                                                                                                                                 |
| RT | RT1093 | 1093 | CC2 | TATTAAT    | 4.75E-05   | 0.0000282 | 25209 | 101 | 23709 | 47 | 0.00013889 | TATABOX3       | Site II element found in the promoter regions of cytochrome genes (Cytc-1, Cytc-2) in Arabidopsis; Located between -147 and -156 from the translational starts sites (Welchen et al., 2005); Y=C/T; See also S000308; Overrepresented in the promoters of nuclear genes encoding components of the oxidative phosphorylation (OxPhos) machinery from both Arabidopsis and rice (Welchen and Gonzalez, 2006);                                                                                                                                                                                                                                                                                                                                                                                                                                                                                                                                                                                                                                                                                                                                                                                                                                                                                                                                                                                                                                                                                                       |
| RT | RT1093 | 1093 | CC2 | TGGGCY     | 1.64E-06   | 1.16E-06  | 20778 | 92  | 28140 | 56 | 0.00013889 | SITEIIATCYTC   | TATA box; TATA box found in the 5'upstream region of pea (Pisum sativum) glutamine synthetase gene; a functional TATA element by in vivo analysis;                                                                                                                                                                                                                                                                                                                                                                                                                                                                                                                                                                                                                                                                                                                                                                                                                                                                                                                                                                                                                                                                                                                                                                                                                                                                                                                                                                 |
| RT | RT1093 | 1093 | CC2 | TTATTT     | 2.05E-06   | 1.20E-06  | 41717 | 144 | 7201  | 4  | 0.00013889 | TATABOX5       | T-Box; Motif found in SAR (scaffold attachment region; or matrix attachment region, MAR);                                                                                                                                                                                                                                                                                                                                                                                                                                                                                                                                                                                                                                                                                                                                                                                                                                                                                                                                                                                                                                                                                                                                                                                                                                                                                                                                                                                                                          |
| RT | RT1093 | 1093 | CC2 | TTWTWTTWTT | 3.66E-06   | 1.99E-06  | 35044 | 130 | 13874 | 18 | 0.00013889 | MARTBOX        | PolyA signal; poly A signal found in legA gene of pea, rice alpha-amylase; -10 to -30 in the case of animal genes. Near upstream elements (NUE) in Arabidopsis (Loke et al. 2005);                                                                                                                                                                                                                                                                                                                                                                                                                                                                                                                                                                                                                                                                                                                                                                                                                                                                                                                                                                                                                                                                                                                                                                                                                                                                                                                                 |
| RT | RT1094 | 1094 | CC1 | AATAAA     | 9.53E-06   | 6.21E-06  | 41717 | 119 | 7227  | 3  | 0.00013889 | POLASIG1       | Plant polyA signal; Consensus sequence for plant polyadenylation signal;                                                                                                                                                                                                                                                                                                                                                                                                                                                                                                                                                                                                                                                                                                                                                                                                                                                                                                                                                                                                                                                                                                                                                                                                                                                                                                                                                                                                                                           |
| RT | RT1094 | 1094 | CC1 | AATAAT     | 2.04E-06   | 1.13E-06  | 40300 | 118 | 8644  | 4  | 0.00013889 | POLASIG3       | PolyA signal; poly A signal found in rice alpha-amylase; -10 to -30 in the case of animal genes. AATAAA; AATAAT; AATTTAAA; AATAAG;                                                                                                                                                                                                                                                                                                                                                                                                                                                                                                                                                                                                                                                                                                                                                                                                                                                                                                                                                                                                                                                                                                                                                                                                                                                                                                                                                                                 |
| RT | RT1094 | 1094 | CC1 | AATTTAAA   | 3.38E-06   | 1.95E-06  | 34519 | 108 | 14425 | 14 | 0.00013889 | POLASIG2       | One of two co-dependent regulatory elements responsible for pollen specific activation of tomato (L.e.) lat52gene; Found at -72to -68 region; See S000246 (POLLEN2LELAT52); AGAAA and TCCACCATA (S000246) are required for                                                                                                                                                                                                                                                                                                                                                                                                                                                                                                                                                                                                                                                                                                                                                                                                                                                                                                                                                                                                                                                                                                                                                                                                                                                                                         |
| RT | RT1094 | 1094 | CC1 | AGAAA      | 7.32E-06   | 3.37E-06  | 43111 | 121 | 5833  | 1  | 0.00013889 | POLLEN1LELAT52 |                                                                                                                                                                                                                                                                                                                                                                                                                                                                                                                                                                                                                                                                                                                                                                                                                                                                                                                                                                                                                                                                                                                                                                                                                                                                                                                                                                                                                                                                                                                    |

|    |        |      |     |            |            |            |       |     |       |    |            |                 |                                                                                                                                                                                                                                                                                                                                                                                                                                                                                                                                                                                                                                                                                                                                                                                                                                                                                                                                                                                                                                                                                                                                                                                                                                                                                                                                                                                                                                                                                                                                                                                                                                                                                                                                                                                                                                                                                                                                                                                                                                                                                                                                                                                                                                                                                                                                                                                                                                                                                                                                                                                                                                                                                                                                                                                                                                                                                                                                                                                                                                                                                                                                                                                                                                                                                                                                                                                                                                                                                                                             |
|----|--------|------|-----|------------|------------|------------|-------|-----|-------|----|------------|-----------------|-----------------------------------------------------------------------------------------------------------------------------------------------------------------------------------------------------------------------------------------------------------------------------------------------------------------------------------------------------------------------------------------------------------------------------------------------------------------------------------------------------------------------------------------------------------------------------------------------------------------------------------------------------------------------------------------------------------------------------------------------------------------------------------------------------------------------------------------------------------------------------------------------------------------------------------------------------------------------------------------------------------------------------------------------------------------------------------------------------------------------------------------------------------------------------------------------------------------------------------------------------------------------------------------------------------------------------------------------------------------------------------------------------------------------------------------------------------------------------------------------------------------------------------------------------------------------------------------------------------------------------------------------------------------------------------------------------------------------------------------------------------------------------------------------------------------------------------------------------------------------------------------------------------------------------------------------------------------------------------------------------------------------------------------------------------------------------------------------------------------------------------------------------------------------------------------------------------------------------------------------------------------------------------------------------------------------------------------------------------------------------------------------------------------------------------------------------------------------------------------------------------------------------------------------------------------------------------------------------------------------------------------------------------------------------------------------------------------------------------------------------------------------------------------------------------------------------------------------------------------------------------------------------------------------------------------------------------------------------------------------------------------------------------------------------------------------------------------------------------------------------------------------------------------------------------------------------------------------------------------------------------------------------------------------------------------------------------------------------------------------------------------------------------------------------------------------------------------------------------------------------------------------------|
| RT | RT1094 | 1094 | CC1 | ATATT      | 3.13E-06   | 1.30E-06   | 42754 | 121 | 6190  | 1  | 0.00013889 | ROOTMOTIFTAPOX1 | <p>pollen specific expression; Also found in the promoter of tomato endo-beta-mannanase gene (LeMAN5) gene (Filichkin et al. 2004);</p> <p>Motif found both in promoters of rolD;</p> <p>SEF1(soybean embryo factor 1) binding motif; sequence found in 5'-upstream region (-640; -765) of soybean beta-conglitin (7S globulin) gene; W=A/T;</p> <p>Binding consensus sequence of Arabidopsis (A.t.) transcription factor, RAV1; RAV1specifically binds to DNA with bipartite sequence motifs of RAV1-A (CAACA) and RAV1-B (CACCTG); RAV1protein contain AP2-like and B3-like domains; The AP2-like and B3-like domains recognize the CAACA and CACCTG motifs, respectively; The expression level of RAV1were relatively high in rosette leaves and roots; See S000315(CACCTG);</p> <p>MYC recognition site found in the promoters of the dehydration-responsive gene rd22and many other genes in Arabidopsis; Binding site of ATMYC2(previously known as rd22BP1); see S000144 (E-box; CANNTG), S000174 (MYCATRD22); N=A/T/G/C; MYC recognition sequence in CBF3promoter; Binding site of ICE1(inducer of CBF expression 1) that regulates the transcription of CBF/DREB1genes in the cold in Arabidopsis; ICE1(Chinnusamy et al., 2004);) This sequence is also known as RRE (R response element)(Hartmann et al., 2005);</p> <p>One of the consensus sequence motifs of organ-specific elements (OSE) characteristic of the promoters activated in infected cells of root nodules; See also S000467;</p> <p>A variant of CarG motif (see S000404), with a longer A/T-rich core; Binding site for AGL15 (AGAMOUS-like 15); W=A/T;</p> <p>GT-1motif found in the promoter of soybean (Glycine max) CaM isoform, ScaM-4; Plays a role in pathogen- and salt-induced ScaM-4 gene expression; See also S000198 (GT-1consensus);</p> <p>EEC; Consensus motif of the two enhancer elements, EE-1and EE-2, both found in the promoter region of the Chlamydomonas Cah1(encoding a periplasmic carbonic anhydrase); Binding site of Myb transcription factor LCR1(see Yoshioka et al, 2004); N=A/G/C/T;</p> <p>I box; "I-box"; Conserved sequence upstream of light-regulated genes; Conserved sequence upstream of light-regulated genes of both monocots and dicots; See IBOX (S000124);</p> <p>one of "Sequences Over-Represented in Light-Induced Promoters (SORLIPs) in Arabidopsis; Computationally identified phyA-induced motifs; See also S000482, S000484, S000485, S000486 (all SORLIPs), and also S000487, S000488, S000489, S000490 (all SORLREPs);</p> <p>Consensus GT-1binding site in many light-regulated genes, e.g., RBCS from many species, PHYA from oat and rice, spinach RCA and PETA, and bean CHS15; R=A/G; W=A/T; For a compilation of related GT elements and factors, see Villain et al. (1996); GT-1can stabilize the TFIIA-TBP-DNA (TATA box) complex; The activation mechanism of GT-1may be achieved through direct interaction between TFIIA and GT-1; Binding of GT-1-like factors to the PR-1a promoter influences the level of SA-inducible gene expression;</p> <p>Plant MYB binding site; Consensus sequence related to box P in promoters of phenylpropanoid biosynthetic genes such as PAL, CHS, CHI, DFR, CL, Bz1; Myb305; M=A/C; W=A/T; See S000355; The AmMYB308 and AmMYB330 transcription factors from Antirrhinum majus regulate phenylpropanoid and lignin biosynthesis in transgenic tobacco;</p> <p>SEF4 binding site; Soybean (G.m.) consensus sequence found in 5'upstream</p> |
| RT | RT1094 | 1094 | CC1 | ATATTTAWW  | 8.74E-06   | 4.67E-06   | 21306 | 78  | 27638 | 44 | 0.00013889 | SEF1MOTIF       |                                                                                                                                                                                                                                                                                                                                                                                                                                                                                                                                                                                                                                                                                                                                                                                                                                                                                                                                                                                                                                                                                                                                                                                                                                                                                                                                                                                                                                                                                                                                                                                                                                                                                                                                                                                                                                                                                                                                                                                                                                                                                                                                                                                                                                                                                                                                                                                                                                                                                                                                                                                                                                                                                                                                                                                                                                                                                                                                                                                                                                                                                                                                                                                                                                                                                                                                                                                                                                                                                                                             |
| RT | RT1094 | 1094 | CC1 | CAACA      | 0.00012792 | 5.44E-05   | 41925 | 118 | 7019  | 4  | 0.00013889 | RAV1AAT         |                                                                                                                                                                                                                                                                                                                                                                                                                                                                                                                                                                                                                                                                                                                                                                                                                                                                                                                                                                                                                                                                                                                                                                                                                                                                                                                                                                                                                                                                                                                                                                                                                                                                                                                                                                                                                                                                                                                                                                                                                                                                                                                                                                                                                                                                                                                                                                                                                                                                                                                                                                                                                                                                                                                                                                                                                                                                                                                                                                                                                                                                                                                                                                                                                                                                                                                                                                                                                                                                                                                             |
| RT | RT1094 | 1094 | CC1 | CANNTG     | 0.00011078 | 5.29E-05   | 42608 | 119 | 6336  | 3  | 0.00013889 | MYCCONSENSUSAT  |                                                                                                                                                                                                                                                                                                                                                                                                                                                                                                                                                                                                                                                                                                                                                                                                                                                                                                                                                                                                                                                                                                                                                                                                                                                                                                                                                                                                                                                                                                                                                                                                                                                                                                                                                                                                                                                                                                                                                                                                                                                                                                                                                                                                                                                                                                                                                                                                                                                                                                                                                                                                                                                                                                                                                                                                                                                                                                                                                                                                                                                                                                                                                                                                                                                                                                                                                                                                                                                                                                                             |
| RT | RT1094 | 1094 | CC1 | CTCTT      | 0.00012329 | 6.73E-05   | 42019 | 118 | 6925  | 4  | 0.00013889 | OSE2ROOTNODULE  |                                                                                                                                                                                                                                                                                                                                                                                                                                                                                                                                                                                                                                                                                                                                                                                                                                                                                                                                                                                                                                                                                                                                                                                                                                                                                                                                                                                                                                                                                                                                                                                                                                                                                                                                                                                                                                                                                                                                                                                                                                                                                                                                                                                                                                                                                                                                                                                                                                                                                                                                                                                                                                                                                                                                                                                                                                                                                                                                                                                                                                                                                                                                                                                                                                                                                                                                                                                                                                                                                                                             |
| RT | RT1094 | 1094 | CC1 | CWWWWWWWWG | 5.38E-05   | 0.00003303 | 30016 | 96  | 18928 | 26 | 0.00013889 | CARGCW8GAT      |                                                                                                                                                                                                                                                                                                                                                                                                                                                                                                                                                                                                                                                                                                                                                                                                                                                                                                                                                                                                                                                                                                                                                                                                                                                                                                                                                                                                                                                                                                                                                                                                                                                                                                                                                                                                                                                                                                                                                                                                                                                                                                                                                                                                                                                                                                                                                                                                                                                                                                                                                                                                                                                                                                                                                                                                                                                                                                                                                                                                                                                                                                                                                                                                                                                                                                                                                                                                                                                                                                                             |
| RT | RT1094 | 1094 | CC1 | GAAAAA     | 6.22E-06   | 3.95E-06   | 41534 | 119 | 7410  | 3  | 0.00013889 | GT1GMSCAM4      |                                                                                                                                                                                                                                                                                                                                                                                                                                                                                                                                                                                                                                                                                                                                                                                                                                                                                                                                                                                                                                                                                                                                                                                                                                                                                                                                                                                                                                                                                                                                                                                                                                                                                                                                                                                                                                                                                                                                                                                                                                                                                                                                                                                                                                                                                                                                                                                                                                                                                                                                                                                                                                                                                                                                                                                                                                                                                                                                                                                                                                                                                                                                                                                                                                                                                                                                                                                                                                                                                                                             |
| RT | RT1094 | 1094 | CC1 | GANTTNC    | 2.74E-05   | 1.58E-05   | 39451 | 115 | 9493  | 7  | 0.00013889 | EECCRCAH1       |                                                                                                                                                                                                                                                                                                                                                                                                                                                                                                                                                                                                                                                                                                                                                                                                                                                                                                                                                                                                                                                                                                                                                                                                                                                                                                                                                                                                                                                                                                                                                                                                                                                                                                                                                                                                                                                                                                                                                                                                                                                                                                                                                                                                                                                                                                                                                                                                                                                                                                                                                                                                                                                                                                                                                                                                                                                                                                                                                                                                                                                                                                                                                                                                                                                                                                                                                                                                                                                                                                                             |
| RT | RT1094 | 1094 | CC1 | GATAA      | 3.32E-05   | 1.57E-05   | 42098 | 119 | 6846  | 3  | 0.00013889 | IBOXCORE        |                                                                                                                                                                                                                                                                                                                                                                                                                                                                                                                                                                                                                                                                                                                                                                                                                                                                                                                                                                                                                                                                                                                                                                                                                                                                                                                                                                                                                                                                                                                                                                                                                                                                                                                                                                                                                                                                                                                                                                                                                                                                                                                                                                                                                                                                                                                                                                                                                                                                                                                                                                                                                                                                                                                                                                                                                                                                                                                                                                                                                                                                                                                                                                                                                                                                                                                                                                                                                                                                                                                             |
| RT | RT1094 | 1094 | CC1 | GGGCC      | 0.00003329 | 2.27E-05   | 18545 | 69  | 30399 | 53 | 0.00013889 | SORLIP2AT       |                                                                                                                                                                                                                                                                                                                                                                                                                                                                                                                                                                                                                                                                                                                                                                                                                                                                                                                                                                                                                                                                                                                                                                                                                                                                                                                                                                                                                                                                                                                                                                                                                                                                                                                                                                                                                                                                                                                                                                                                                                                                                                                                                                                                                                                                                                                                                                                                                                                                                                                                                                                                                                                                                                                                                                                                                                                                                                                                                                                                                                                                                                                                                                                                                                                                                                                                                                                                                                                                                                                             |
| RT | RT1094 | 1094 | CC1 | GRWAAW     | 0.00001151 | 4.90E-06   | 43253 | 121 | 5691  | 1  | 0.00013889 | GT1CONSENSUS    |                                                                                                                                                                                                                                                                                                                                                                                                                                                                                                                                                                                                                                                                                                                                                                                                                                                                                                                                                                                                                                                                                                                                                                                                                                                                                                                                                                                                                                                                                                                                                                                                                                                                                                                                                                                                                                                                                                                                                                                                                                                                                                                                                                                                                                                                                                                                                                                                                                                                                                                                                                                                                                                                                                                                                                                                                                                                                                                                                                                                                                                                                                                                                                                                                                                                                                                                                                                                                                                                                                                             |
| RT | RT1094 | 1094 | CC1 | MACCWAMC   | 4.39E-05   | 2.44E-05   | 16326 | 63  | 32618 | 59 | 0.00013889 | MYBPLANT        |                                                                                                                                                                                                                                                                                                                                                                                                                                                                                                                                                                                                                                                                                                                                                                                                                                                                                                                                                                                                                                                                                                                                                                                                                                                                                                                                                                                                                                                                                                                                                                                                                                                                                                                                                                                                                                                                                                                                                                                                                                                                                                                                                                                                                                                                                                                                                                                                                                                                                                                                                                                                                                                                                                                                                                                                                                                                                                                                                                                                                                                                                                                                                                                                                                                                                                                                                                                                                                                                                                                             |
| RT | RT1094 | 1094 | CC1 | RGATY      | 1.10E-05   | 6.98E-06   | 43388 | 121 | 5556  | 1  | 0.00013889 |                 |                                                                                                                                                                                                                                                                                                                                                                                                                                                                                                                                                                                                                                                                                                                                                                                                                                                                                                                                                                                                                                                                                                                                                                                                                                                                                                                                                                                                                                                                                                                                                                                                                                                                                                                                                                                                                                                                                                                                                                                                                                                                                                                                                                                                                                                                                                                                                                                                                                                                                                                                                                                                                                                                                                                                                                                                                                                                                                                                                                                                                                                                                                                                                                                                                                                                                                                                                                                                                                                                                                                             |
| RT | RT1094 | 1094 | CC1 | RTTTTTR    | 5.13E-07   | 3.07E-07   | 41329 | 120 | 7615  | 2  | 0.00013889 | SEF4MOTIFGM7S   |                                                                                                                                                                                                                                                                                                                                                                                                                                                                                                                                                                                                                                                                                                                                                                                                                                                                                                                                                                                                                                                                                                                                                                                                                                                                                                                                                                                                                                                                                                                                                                                                                                                                                                                                                                                                                                                                                                                                                                                                                                                                                                                                                                                                                                                                                                                                                                                                                                                                                                                                                                                                                                                                                                                                                                                                                                                                                                                                                                                                                                                                                                                                                                                                                                                                                                                                                                                                                                                                                                                             |

|    |        |      |     |            |            |            |       |     |       |     |            |                  |                                                                                                                                                                                                                                                                                                                                                                                                                                                                                                                                                                                                                                                                                                                                                                                                                                                                                                                                                                                                                                                                                                                                                                                                                                                                                                                                                                                                                                                                                                                                                                                                                                                                                                                                                                                                                                                                                                                                                                                                                                                                                                                                                                                                                                                                                                                                                                                                                                                                                                                                                                                                                                                                                                                                                                                                                                                                                                                                                                                                                                                                                                                                                                                                                                                                                                                                                               |
|----|--------|------|-----|------------|------------|------------|-------|-----|-------|-----|------------|------------------|---------------------------------------------------------------------------------------------------------------------------------------------------------------------------------------------------------------------------------------------------------------------------------------------------------------------------------------------------------------------------------------------------------------------------------------------------------------------------------------------------------------------------------------------------------------------------------------------------------------------------------------------------------------------------------------------------------------------------------------------------------------------------------------------------------------------------------------------------------------------------------------------------------------------------------------------------------------------------------------------------------------------------------------------------------------------------------------------------------------------------------------------------------------------------------------------------------------------------------------------------------------------------------------------------------------------------------------------------------------------------------------------------------------------------------------------------------------------------------------------------------------------------------------------------------------------------------------------------------------------------------------------------------------------------------------------------------------------------------------------------------------------------------------------------------------------------------------------------------------------------------------------------------------------------------------------------------------------------------------------------------------------------------------------------------------------------------------------------------------------------------------------------------------------------------------------------------------------------------------------------------------------------------------------------------------------------------------------------------------------------------------------------------------------------------------------------------------------------------------------------------------------------------------------------------------------------------------------------------------------------------------------------------------------------------------------------------------------------------------------------------------------------------------------------------------------------------------------------------------------------------------------------------------------------------------------------------------------------------------------------------------------------------------------------------------------------------------------------------------------------------------------------------------------------------------------------------------------------------------------------------------------------------------------------------------------------------------------------------------|
| RT | RT1094 | 1094 | CC1 | TAAAATAT   | 0.0002046  | 0.00012226 | 20194 | 71  | 28750 | 51  | 0.00013889 | LECPLEACS2       | region (-199) of beta-conglycinin (7S globulin) gene (Gmg17.1); "Binding with SEF4 (soybean embryo factor 4)"; R=A/G; Core element in LeCp (tomato Cys protease) binding cis-element (from -715 to -675) in LeAcs2gene; amylase box; Conserved sequence found in 5'-upstream region of alpha-amylase gene of rice, wheat, barley; TATA box; TATA box found in the 5'upstream region of sweet potato sporamin A gene; Binding site for OsTBP2, found in the promoter of rice pal gene encoding phenylalanine ammonia-lyase; OsTFIIB stimulated the DNA binding and bending activities of OsTBP2and synergistically enhanced OsTBP2-mediated transcription from the pal promoter; Site II element found in the promoter regions of cytochrome genes (CytC-1, CytC-2) in Arabidopsis; Located between -147 and -156 from the translational starts sites (Welchen et al., 2005); Y=C/T; See also S000308; Overrepresented in the promoters of nuclear genes encoding components of the oxidative phosphorylation (OxPhos) machinery from both Arabidopsis and rice (Welchen and Gonzalez, 2006);) TATA box; TATA box found in the 5'upstream region of pea (Pisum sativum) glutamine synthetase gene; a functional TATA element by in vivo analysis; WB box; WRKY proteins bind specifically to the DNA sequence motif (T)(T)TGAC(C/T), which is known as the W box; Found in amylase gene in sweet potato, alpha-Amy2genes in wheat, barley, and wild oat, PR1gene in parsley, and a transcription factor gene in Arabidopsis; The motif was initially registered in PLACEdb as TTGACT, and was corrected to TTGACY on 22June, 2006; Y=C/T; T-Box; Motif found in SAR (scaffold attachment region; or matrix attachment region, MAR); Sequence found in Arabidopsis (A.t.) acyl carrier protein (ACP), Acl1.2, gene promoter; Contains bZIP core motif (ACGT); Plant polyA signal; Consensus sequence for plant polyadenylation signal; SEF4 binding site; Soybean (G.m.) consensus sequence found in 5'upstream region (-199) of beta-conglycinin (7S globulin) gene (Gmg17.1); "Binding with SEF4 (soybean embryo factor 4)"; R=A/G; TATA box; TATA box found in the 5'upstream region of pea (Pisum sativum) glutamine synthetase gene; a functional TATA element by in vivo analysis; Sequence found in Arabidopsis (A.t.) acyl carrier protein (ACP), Acl1.2, gene promoter; Contains bZIP core motif (ACGT); One of the consensus sequence motifs of organ-specific elements (OSE) characteristic of the promoters activated in infected cells of root nodules; See also S000468; One of the consensus sequence motifs of organ-specific elements (OSE) characteristic of the promoters activated in infected cells of root nodules; See also S000468; The sequence critical for Cytokinin-enhanced Protein Binding in vitro, found in -490 to -340 of the promoter of the cucumber (CS) POR (NADPH-protochlorophyllide reductase) gene; Binding site for OsTBP2, found in the promoter of rice pal gene encoding phenylalanine ammonia-lyase; OsTFIIB stimulated the DNA binding and bending activities of OsTBP2and synergistically enhanced OsTBP2-mediated transcription from the pal promoter; SEF4 binding site; Soybean (G.m.) consensus sequence found in 5'upstream region (-199) of beta-conglycinin (7S globulin) gene (Gmg17.1); "Binding with |
| RT | RT1094 | 1094 | CC1 | TAACARA    | 0.00025388 | 0.0001288  | 25083 | 83  | 23861 | 39  | 0.00013889 | AMYBOX1          |                                                                                                                                                                                                                                                                                                                                                                                                                                                                                                                                                                                                                                                                                                                                                                                                                                                                                                                                                                                                                                                                                                                                                                                                                                                                                                                                                                                                                                                                                                                                                                                                                                                                                                                                                                                                                                                                                                                                                                                                                                                                                                                                                                                                                                                                                                                                                                                                                                                                                                                                                                                                                                                                                                                                                                                                                                                                                                                                                                                                                                                                                                                                                                                                                                                                                                                                                               |
| RT | RT1094 | 1094 | CC1 | TATTAAT    | 2.53E-05   | 1.62E-05   | 25224 | 86  | 23720 | 36  | 0.00013889 | TATABOX3         |                                                                                                                                                                                                                                                                                                                                                                                                                                                                                                                                                                                                                                                                                                                                                                                                                                                                                                                                                                                                                                                                                                                                                                                                                                                                                                                                                                                                                                                                                                                                                                                                                                                                                                                                                                                                                                                                                                                                                                                                                                                                                                                                                                                                                                                                                                                                                                                                                                                                                                                                                                                                                                                                                                                                                                                                                                                                                                                                                                                                                                                                                                                                                                                                                                                                                                                                                               |
| RT | RT1094 | 1094 | CC1 | TATTTAA    | 3.03E-05   | 1.91E-05   | 28367 | 93  | 20577 | 29  | 0.00013889 | TATABOXOSPAL     |                                                                                                                                                                                                                                                                                                                                                                                                                                                                                                                                                                                                                                                                                                                                                                                                                                                                                                                                                                                                                                                                                                                                                                                                                                                                                                                                                                                                                                                                                                                                                                                                                                                                                                                                                                                                                                                                                                                                                                                                                                                                                                                                                                                                                                                                                                                                                                                                                                                                                                                                                                                                                                                                                                                                                                                                                                                                                                                                                                                                                                                                                                                                                                                                                                                                                                                                                               |
| RT | RT1094 | 1094 | CC1 | TGGGCY     | 0.00006872 | 0.00004158 | 20796 | 74  | 28148 | 48  | 0.00013889 | SITEIIATCYTC     | TATA box; TATA box found in the 5'upstream region of pea (Pisum sativum) glutamine synthetase gene; a functional TATA element by in vivo analysis; WB box; WRKY proteins bind specifically to the DNA sequence motif (T)(T)TGAC(C/T), which is known as the W box; Found in amylase gene in sweet potato, alpha-Amy2genes in wheat, barley, and wild oat, PR1gene in parsley, and a transcription factor gene in Arabidopsis; The motif was initially registered in PLACEdb as TTGACT, and was corrected to TTGACY on 22June, 2006; Y=C/T; T-Box; Motif found in SAR (scaffold attachment region; or matrix attachment region, MAR); Sequence found in Arabidopsis (A.t.) acyl carrier protein (ACP), Acl1.2, gene promoter; Contains bZIP core motif (ACGT); Plant polyA signal; Consensus sequence for plant polyadenylation signal; SEF4 binding site; Soybean (G.m.) consensus sequence found in 5'upstream region (-199) of beta-conglycinin (7S globulin) gene (Gmg17.1); "Binding with SEF4 (soybean embryo factor 4)"; R=A/G; TATA box; TATA box found in the 5'upstream region of pea (Pisum sativum) glutamine synthetase gene; a functional TATA element by in vivo analysis; Sequence found in Arabidopsis (A.t.) acyl carrier protein (ACP), Acl1.2, gene promoter; Contains bZIP core motif (ACGT); One of the consensus sequence motifs of organ-specific elements (OSE) characteristic of the promoters activated in infected cells of root nodules; See also S000468; One of the consensus sequence motifs of organ-specific elements (OSE) characteristic of the promoters activated in infected cells of root nodules; See also S000468; The sequence critical for Cytokinin-enhanced Protein Binding in vitro, found in -490 to -340 of the promoter of the cucumber (CS) POR (NADPH-protochlorophyllide reductase) gene; Binding site for OsTBP2, found in the promoter of rice pal gene encoding phenylalanine ammonia-lyase; OsTFIIB stimulated the DNA binding and bending activities of OsTBP2and synergistically enhanced OsTBP2-mediated transcription from the pal promoter; SEF4 binding site; Soybean (G.m.) consensus sequence found in 5'upstream region (-199) of beta-conglycinin (7S globulin) gene (Gmg17.1); "Binding with                                                                                                                                                                                                                                                                                                                                                                                                                                                                                                                                                                                                                                                                                                                                                                                                                                                                                                                                                                                                                                                                                               |
| RT | RT1094 | 1094 | CC1 | TTATTT     | 2.01E-06   | 9.08E-07   | 41741 | 120 | 7203  | 2   | 0.00013889 | TATABOX5         |                                                                                                                                                                                                                                                                                                                                                                                                                                                                                                                                                                                                                                                                                                                                                                                                                                                                                                                                                                                                                                                                                                                                                                                                                                                                                                                                                                                                                                                                                                                                                                                                                                                                                                                                                                                                                                                                                                                                                                                                                                                                                                                                                                                                                                                                                                                                                                                                                                                                                                                                                                                                                                                                                                                                                                                                                                                                                                                                                                                                                                                                                                                                                                                                                                                                                                                                                               |
| RT | RT1094 | 1094 | CC1 | TTTGACY    | 0.00015374 | 9.82E-05   | 18146 | 66  | 30798 | 56  | 0.00013889 | WBBOXPCWRKY1     |                                                                                                                                                                                                                                                                                                                                                                                                                                                                                                                                                                                                                                                                                                                                                                                                                                                                                                                                                                                                                                                                                                                                                                                                                                                                                                                                                                                                                                                                                                                                                                                                                                                                                                                                                                                                                                                                                                                                                                                                                                                                                                                                                                                                                                                                                                                                                                                                                                                                                                                                                                                                                                                                                                                                                                                                                                                                                                                                                                                                                                                                                                                                                                                                                                                                                                                                                               |
| RT | RT1094 | 1094 | CC1 | TTWTWTTWTT | 5.34E-08   | 3.65E-08   | 35062 | 112 | 13882 | 10  | 0.00013889 | MARTBOX          |                                                                                                                                                                                                                                                                                                                                                                                                                                                                                                                                                                                                                                                                                                                                                                                                                                                                                                                                                                                                                                                                                                                                                                                                                                                                                                                                                                                                                                                                                                                                                                                                                                                                                                                                                                                                                                                                                                                                                                                                                                                                                                                                                                                                                                                                                                                                                                                                                                                                                                                                                                                                                                                                                                                                                                                                                                                                                                                                                                                                                                                                                                                                                                                                                                                                                                                                                               |
| RT | RT1094 | 1094 | CC2 | AAGACGTAG  | 8.02E-05   | 8.02E-05   | 101   | 4   | 48860 | 101 | 0.00013889 | AAGACGTAGATACL12 | One of the consensus sequence motifs of organ-specific elements (OSE) characteristic of the promoters activated in infected cells of root nodules; See also S000468; One of the consensus sequence motifs of organ-specific elements (OSE) characteristic of the promoters activated in infected cells of root nodules; See also S000468; The sequence critical for Cytokinin-enhanced Protein Binding in vitro, found in -490 to -340 of the promoter of the cucumber (CS) POR (NADPH-protochlorophyllide reductase) gene; Binding site for OsTBP2, found in the promoter of rice pal gene encoding phenylalanine ammonia-lyase; OsTFIIB stimulated the DNA binding and bending activities of OsTBP2and synergistically enhanced OsTBP2-mediated transcription from the pal promoter; SEF4 binding site; Soybean (G.m.) consensus sequence found in 5'upstream region (-199) of beta-conglycinin (7S globulin) gene (Gmg17.1); "Binding with                                                                                                                                                                                                                                                                                                                                                                                                                                                                                                                                                                                                                                                                                                                                                                                                                                                                                                                                                                                                                                                                                                                                                                                                                                                                                                                                                                                                                                                                                                                                                                                                                                                                                                                                                                                                                                                                                                                                                                                                                                                                                                                                                                                                                                                                                                                                                                                                                 |
| RT | RT1095 | 1095 | CC1 | AATAAT     | 0.00011137 | 0.00005833 | 40344 | 74  | 8646  | 2   | 0.00013889 | POLASIG3         |                                                                                                                                                                                                                                                                                                                                                                                                                                                                                                                                                                                                                                                                                                                                                                                                                                                                                                                                                                                                                                                                                                                                                                                                                                                                                                                                                                                                                                                                                                                                                                                                                                                                                                                                                                                                                                                                                                                                                                                                                                                                                                                                                                                                                                                                                                                                                                                                                                                                                                                                                                                                                                                                                                                                                                                                                                                                                                                                                                                                                                                                                                                                                                                                                                                                                                                                                               |
| RT | RT1095 | 1095 | CC1 | RTTTTTR    | 8.56E-05   | 4.01E-05   | 41374 | 75  | 7616  | 1   | 0.00013889 | SEF4MOTIFGM7S    |                                                                                                                                                                                                                                                                                                                                                                                                                                                                                                                                                                                                                                                                                                                                                                                                                                                                                                                                                                                                                                                                                                                                                                                                                                                                                                                                                                                                                                                                                                                                                                                                                                                                                                                                                                                                                                                                                                                                                                                                                                                                                                                                                                                                                                                                                                                                                                                                                                                                                                                                                                                                                                                                                                                                                                                                                                                                                                                                                                                                                                                                                                                                                                                                                                                                                                                                                               |
| RT | RT1095 | 1095 | CC1 | TTATTT     | 0.00013185 | 8.00E-05   | 41786 | 75  | 7204  | 1   | 0.00013889 | TATABOX5         |                                                                                                                                                                                                                                                                                                                                                                                                                                                                                                                                                                                                                                                                                                                                                                                                                                                                                                                                                                                                                                                                                                                                                                                                                                                                                                                                                                                                                                                                                                                                                                                                                                                                                                                                                                                                                                                                                                                                                                                                                                                                                                                                                                                                                                                                                                                                                                                                                                                                                                                                                                                                                                                                                                                                                                                                                                                                                                                                                                                                                                                                                                                                                                                                                                                                                                                                                               |
| RT | RT1095 | 1095 | CC2 | AAGACGTAG  | 4.79E-05   | 4.79E-05   | 101   | 4   | 48873 | 88  | 0.00013889 | AAGACGTAGATACL12 | One of the consensus sequence motifs of organ-specific elements (OSE) characteristic of the promoters activated in infected cells of root nodules; See also S000468; One of the consensus sequence motifs of organ-specific elements (OSE) characteristic of the promoters activated in infected cells of root nodules; See also S000468; The sequence critical for Cytokinin-enhanced Protein Binding in vitro, found in -490 to -340 of the promoter of the cucumber (CS) POR (NADPH-protochlorophyllide reductase) gene; Binding site for OsTBP2, found in the promoter of rice pal gene encoding phenylalanine ammonia-lyase; OsTFIIB stimulated the DNA binding and bending activities of OsTBP2and synergistically enhanced OsTBP2-mediated transcription from the pal promoter; SEF4 binding site; Soybean (G.m.) consensus sequence found in 5'upstream region (-199) of beta-conglycinin (7S globulin) gene (Gmg17.1); "Binding with                                                                                                                                                                                                                                                                                                                                                                                                                                                                                                                                                                                                                                                                                                                                                                                                                                                                                                                                                                                                                                                                                                                                                                                                                                                                                                                                                                                                                                                                                                                                                                                                                                                                                                                                                                                                                                                                                                                                                                                                                                                                                                                                                                                                                                                                                                                                                                                                                 |
| RT | RT1654 | 1654 | CC1 | AAAGAT     | 0.0002706  | 0.00012696 | 36559 | 74  | 12426 | 7   | 0.00013889 | OSE1ROOTNODULE   |                                                                                                                                                                                                                                                                                                                                                                                                                                                                                                                                                                                                                                                                                                                                                                                                                                                                                                                                                                                                                                                                                                                                                                                                                                                                                                                                                                                                                                                                                                                                                                                                                                                                                                                                                                                                                                                                                                                                                                                                                                                                                                                                                                                                                                                                                                                                                                                                                                                                                                                                                                                                                                                                                                                                                                                                                                                                                                                                                                                                                                                                                                                                                                                                                                                                                                                                                               |
| RT | RT1655 | 1655 | CC1 | AAAGAT     | 6.41E-05   | 3.78E-05   | 36548 | 85  | 12425 | 8   | 0.00013889 | OSE1ROOTNODULE   |                                                                                                                                                                                                                                                                                                                                                                                                                                                                                                                                                                                                                                                                                                                                                                                                                                                                                                                                                                                                                                                                                                                                                                                                                                                                                                                                                                                                                                                                                                                                                                                                                                                                                                                                                                                                                                                                                                                                                                                                                                                                                                                                                                                                                                                                                                                                                                                                                                                                                                                                                                                                                                                                                                                                                                                                                                                                                                                                                                                                                                                                                                                                                                                                                                                                                                                                                               |
| RT | RT1655 | 1655 | CC1 | TATTAG     | 8.85E-05   | 5.16E-05   | 27628 | 71  | 21345 | 22  | 0.00013889 | CPBCSPOR         |                                                                                                                                                                                                                                                                                                                                                                                                                                                                                                                                                                                                                                                                                                                                                                                                                                                                                                                                                                                                                                                                                                                                                                                                                                                                                                                                                                                                                                                                                                                                                                                                                                                                                                                                                                                                                                                                                                                                                                                                                                                                                                                                                                                                                                                                                                                                                                                                                                                                                                                                                                                                                                                                                                                                                                                                                                                                                                                                                                                                                                                                                                                                                                                                                                                                                                                                                               |
| RT | RT1655 | 1655 | CC1 | TATTTAA    | 5.04E-05   | 2.58E-05   | 28387 | 73  | 20586 | 20  | 0.00013889 | TATABOXOSPAL     | One of the consensus sequence motifs of organ-specific elements (OSE) characteristic of the promoters activated in infected cells of root nodules; See also S000468; One of the consensus sequence motifs of organ-specific elements (OSE) characteristic of the promoters activated in infected cells of root nodules; See also S000468; The sequence critical for Cytokinin-enhanced Protein Binding in vitro, found in -490 to -340 of the promoter of the cucumber (CS) POR (NADPH-protochlorophyllide reductase) gene; Binding site for OsTBP2, found in the promoter of rice pal gene encoding phenylalanine ammonia-lyase; OsTFIIB stimulated the DNA binding and bending activities of OsTBP2and synergistically enhanced OsTBP2-mediated transcription from the pal promoter; SEF4 binding site; Soybean (G.m.) consensus sequence found in 5'upstream region (-199) of beta-conglycinin (7S globulin) gene (Gmg17.1); "Binding with                                                                                                                                                                                                                                                                                                                                                                                                                                                                                                                                                                                                                                                                                                                                                                                                                                                                                                                                                                                                                                                                                                                                                                                                                                                                                                                                                                                                                                                                                                                                                                                                                                                                                                                                                                                                                                                                                                                                                                                                                                                                                                                                                                                                                                                                                                                                                                                                                 |
| RT | RT1656 | 1656 | CC1 | RTTTTTR    | 0.0001804  | 0.00011145 | 41357 | 92  | 7614  | 3   | 0.00013889 | SEF4MOTIFGM7S    |                                                                                                                                                                                                                                                                                                                                                                                                                                                                                                                                                                                                                                                                                                                                                                                                                                                                                                                                                                                                                                                                                                                                                                                                                                                                                                                                                                                                                                                                                                                                                                                                                                                                                                                                                                                                                                                                                                                                                                                                                                                                                                                                                                                                                                                                                                                                                                                                                                                                                                                                                                                                                                                                                                                                                                                                                                                                                                                                                                                                                                                                                                                                                                                                                                                                                                                                                               |

|    |        |      |     |         |            |            |       |    |       |    |            |                 |                                                                                                                                                                                                                                                                                                                                                                                                                                                                                                                                                                                                                                                                                                                                                                                                                                                                                                                                                                                                                                                                                                                                                                                                                                                                                                                                                                                     |
|----|--------|------|-----|---------|------------|------------|-------|----|-------|----|------------|-----------------|-------------------------------------------------------------------------------------------------------------------------------------------------------------------------------------------------------------------------------------------------------------------------------------------------------------------------------------------------------------------------------------------------------------------------------------------------------------------------------------------------------------------------------------------------------------------------------------------------------------------------------------------------------------------------------------------------------------------------------------------------------------------------------------------------------------------------------------------------------------------------------------------------------------------------------------------------------------------------------------------------------------------------------------------------------------------------------------------------------------------------------------------------------------------------------------------------------------------------------------------------------------------------------------------------------------------------------------------------------------------------------------|
| RT | RT1656 | 1656 | CC1 | TATTAG  | 0.00004361 | 2.75E-05   | 27626 | 73 | 21345 | 22 | 0.00013889 | CPBCSPOR        | SEF4 (soybean embryo factor 4)"; R=A/G;<br>The sequence critical for Cytokinin-enhanced Protein Binding in vitro, found in -490 to -340 of the promoter of the cucumber (CS) POR (NADPH-protochlorophyllide reductase) gene;<br>Binding site for OsTBP2, found in the promoter of rice pal gene encoding phenylalanine ammonia-lyase; OsTFIIB stimulated the DNA binding and bending activities of OsTBP2and synergistically enhanced OsTBP2-mediated transcription from the pal promoter;<br>SEF4 binding site; Soybean (G.m.) consensus sequence found in 5'upstream region (-199) of beta-conglycinin (7S globulin) gene (Gmg17.1); "Binding with SEF4 (soybean embryo factor 4)"; R=A/G;<br>The sequence critical for Cytokinin-enhanced Protein Binding in vitro, found in -490 to -340 of the promoter of the cucumber (CS) POR (NADPH-protochlorophyllide reductase) gene;<br>Binding site for OsTBP2, found in the promoter of rice pal gene encoding phenylalanine ammonia-lyase; OsTFIIB stimulated the DNA binding and bending activities of OsTBP2and synergistically enhanced OsTBP2-mediated transcription from the pal promoter;                                                                                                                                                                                                                                     |
| RT | RT1656 | 1656 | CC1 | TATTTAA | 8.83E-06   | 4.82E-06   | 28384 | 76 | 20587 | 19 | 0.00013889 | TATABOXOSPAL    |                                                                                                                                                                                                                                                                                                                                                                                                                                                                                                                                                                                                                                                                                                                                                                                                                                                                                                                                                                                                                                                                                                                                                                                                                                                                                                                                                                                     |
| RT | RT1657 | 1657 | CC1 | RTTTTTR | 0.00012411 | 7.33E-05   | 41354 | 95 | 7614  | 3  | 0.00013889 | SEF4MOTIFGM7S   |                                                                                                                                                                                                                                                                                                                                                                                                                                                                                                                                                                                                                                                                                                                                                                                                                                                                                                                                                                                                                                                                                                                                                                                                                                                                                                                                                                                     |
| RT | RT1657 | 1657 | CC1 | TATTAG  | 1.49E-05   | 1.04E-05   | 27623 | 76 | 21345 | 22 | 0.00013889 | CPBCSPOR        |                                                                                                                                                                                                                                                                                                                                                                                                                                                                                                                                                                                                                                                                                                                                                                                                                                                                                                                                                                                                                                                                                                                                                                                                                                                                                                                                                                                     |
| RT | RT1657 | 1657 | CC1 | TATTTAA | 5.59E-05   | 3.83E-05   | 28384 | 76 | 20584 | 22 | 0.00013889 | TATABOXOSPAL    |                                                                                                                                                                                                                                                                                                                                                                                                                                                                                                                                                                                                                                                                                                                                                                                                                                                                                                                                                                                                                                                                                                                                                                                                                                                                                                                                                                                     |
| RT | RT1658 | 1658 | CC1 | ATATT   | 4.91E-05   | 0.000024   | 42777 | 98 | 6190  | 1  | 0.00013889 | ROOTMOTIFTAPOX1 | Motif found both in promoters of rolD;<br>Consensus GT-1binding site in many light-regulated genes, e.g., RBCS from many species, PHYA from oat and rice, spinach RCA and PETA, and bean CHS15; R=A/G; W=A/T; For a compilation of related GT elements and factors, see Villain et al. (1996); GT-1can stabilize the TFIIA-TBP-DNA (TATA box) complex; The activation mechanism of GT-1may be achieved through direct interaction between TFIIA and GT-1; Binding of GT-1-like factors to the PR-1a promoter influences the level of SA-inducible gene expression;                                                                                                                                                                                                                                                                                                                                                                                                                                                                                                                                                                                                                                                                                                                                                                                                                  |
| RT | RT1658 | 1658 | CC1 | GRWAAW  | 0.00011452 | 6.91E-05   | 43276 | 98 | 5691  | 1  | 0.00013889 | GT1CONSENSUS    | SEF4 binding site; Soybean (G.m.) consensus sequence found in 5'upstream region (-199) of beta-conglycinin (7S globulin) gene (Gmg17.1); "Binding with SEF4 (soybean embryo factor 4)"; R=A/G;<br>TAAAG motif found in promoter of Solanum tuberosum (S.t.) KST1gene;<br>Target site for trans-acting StDof1protein controlling guard cell-specific gene expression; KST1gene encodes a K+ influx channel of guard cells; See S000265;<br>The sequence critical for Cytokinin-enhanced Protein Binding in vitro, found in -490 to -340 of the promoter of the cucumber (CS) POR (NADPH-protochlorophyllide reductase) gene;<br>Motif found both in promoters of rolD;<br>I box; "I-box"; Conserved sequence upstream of light-regulated genes;<br>Conserved sequence upstream of light-regulated genes of both monocots and dicots; See IBOX (S000124);<br>Consensus GT-1binding site in many light-regulated genes, e.g., RBCS from many species, PHYA from oat and rice, spinach RCA and PETA, and bean CHS15; R=A/G; W=A/T; For a compilation of related GT elements and factors, see Villain et al. (1996); GT-1can stabilize the TFIIA-TBP-DNA (TATA box) complex; The activation mechanism of GT-1may be achieved through direct interaction between TFIIA and GT-1; Binding of GT-1-like factors to the PR-1a promoter influences the level of SA-inducible gene expression; |
| RT | RT1658 | 1658 | CC1 | RGATY   | 0.00017685 | 0.00009171 | 43411 | 98 | 5556  | 1  | 0.00013889 |                 |                                                                                                                                                                                                                                                                                                                                                                                                                                                                                                                                                                                                                                                                                                                                                                                                                                                                                                                                                                                                                                                                                                                                                                                                                                                                                                                                                                                     |
| RT | RT1658 | 1658 | CC1 | RTTTTTR | 0.00012676 | 0.00006376 | 41353 | 96 | 7614  | 3  | 0.00013889 | SEF4MOTIFGM7S   |                                                                                                                                                                                                                                                                                                                                                                                                                                                                                                                                                                                                                                                                                                                                                                                                                                                                                                                                                                                                                                                                                                                                                                                                                                                                                                                                                                                     |
| RT | RT1658 | 1658 | CC1 | TAAAG   | 0.00010529 | 5.50E-05   | 42176 | 97 | 6791  | 2  | 0.00013889 | TAAAGSTKST1     |                                                                                                                                                                                                                                                                                                                                                                                                                                                                                                                                                                                                                                                                                                                                                                                                                                                                                                                                                                                                                                                                                                                                                                                                                                                                                                                                                                                     |
| RT | RT1658 | 1658 | CC1 | TATTAG  | 9.53E-05   | 0.00005084 | 27624 | 75 | 21343 | 24 | 0.00013889 | CPBCSPOR        |                                                                                                                                                                                                                                                                                                                                                                                                                                                                                                                                                                                                                                                                                                                                                                                                                                                                                                                                                                                                                                                                                                                                                                                                                                                                                                                                                                                     |
| RT | RT1659 | 1659 | CC1 | ATATT   | 4.74E-05   | 3.09E-05   | 42779 | 96 | 6190  | 1  | 0.00013889 | ROOTMOTIFTAPOX1 |                                                                                                                                                                                                                                                                                                                                                                                                                                                                                                                                                                                                                                                                                                                                                                                                                                                                                                                                                                                                                                                                                                                                                                                                                                                                                                                                                                                     |
| RT | RT1659 | 1659 | CC1 | GATAA   | 0.00010255 | 6.39E-05   | 42122 | 95 | 6847  | 2  | 0.00013889 | IBOXCORE        |                                                                                                                                                                                                                                                                                                                                                                                                                                                                                                                                                                                                                                                                                                                                                                                                                                                                                                                                                                                                                                                                                                                                                                                                                                                                                                                                                                                     |
| RT | RT1659 | 1659 | CC1 | GRWAAW  | 0.00017469 | 8.68E-05   | 43278 | 96 | 5691  | 1  | 0.00013889 | GT1CONSENSUS    | SEF4 binding site; Soybean (G.m.) consensus sequence found in 5'upstream region (-199) of beta-conglycinin (7S globulin) gene (Gmg17.1); "Binding with SEF4 (soybean embryo factor 4)"; R=A/G;                                                                                                                                                                                                                                                                                                                                                                                                                                                                                                                                                                                                                                                                                                                                                                                                                                                                                                                                                                                                                                                                                                                                                                                      |
| RT | RT1659 | 1659 | CC1 | RGATY   | 0.00027867 | 0.0001145  | 43413 | 96 | 5556  | 1  | 0.00013889 |                 |                                                                                                                                                                                                                                                                                                                                                                                                                                                                                                                                                                                                                                                                                                                                                                                                                                                                                                                                                                                                                                                                                                                                                                                                                                                                                                                                                                                     |
| RT | RT1659 | 1659 | CC1 | RTTTTTR | 0.00018992 | 8.43E-05   | 41355 | 94 | 7614  | 3  | 0.00013889 | SEF4MOTIFGM7S   |                                                                                                                                                                                                                                                                                                                                                                                                                                                                                                                                                                                                                                                                                                                                                                                                                                                                                                                                                                                                                                                                                                                                                                                                                                                                                                                                                                                     |

|    |        |      |     |          |            |            |       |     |       |     |            |                    |                                                                                                                                                                                                                                                                                                                                                                                                                                                                                                                                                                                                                                                                                                                                                                                                                                                                                                                                                                                                                                                                                                                                                                                                                                                                                                                                                                                                                                                                                                                                                                                                                                                                                                                                                                                                                                                                                                                                                                                                                                                                                                                                                                                                                                                                                                                                                                                                                                                                                                                                                                                                                                                                                                                                                                                                                                                                                                                                                                                                                                                                                                                                                                                                                                                                                                                                                              |
|----|--------|------|-----|----------|------------|------------|-------|-----|-------|-----|------------|--------------------|--------------------------------------------------------------------------------------------------------------------------------------------------------------------------------------------------------------------------------------------------------------------------------------------------------------------------------------------------------------------------------------------------------------------------------------------------------------------------------------------------------------------------------------------------------------------------------------------------------------------------------------------------------------------------------------------------------------------------------------------------------------------------------------------------------------------------------------------------------------------------------------------------------------------------------------------------------------------------------------------------------------------------------------------------------------------------------------------------------------------------------------------------------------------------------------------------------------------------------------------------------------------------------------------------------------------------------------------------------------------------------------------------------------------------------------------------------------------------------------------------------------------------------------------------------------------------------------------------------------------------------------------------------------------------------------------------------------------------------------------------------------------------------------------------------------------------------------------------------------------------------------------------------------------------------------------------------------------------------------------------------------------------------------------------------------------------------------------------------------------------------------------------------------------------------------------------------------------------------------------------------------------------------------------------------------------------------------------------------------------------------------------------------------------------------------------------------------------------------------------------------------------------------------------------------------------------------------------------------------------------------------------------------------------------------------------------------------------------------------------------------------------------------------------------------------------------------------------------------------------------------------------------------------------------------------------------------------------------------------------------------------------------------------------------------------------------------------------------------------------------------------------------------------------------------------------------------------------------------------------------------------------------------------------------------------------------------------------------------------|
| RT | RT1659 | 1659 | CC1 | TAAAG    | 0.00016065 | 7.14E-05   | 42178 | 95  | 6791  | 2   | 0.00013889 | TAAAGSTKST1        | TAAAG motif found in promoter of Solanum tuberosum (S.t.) KST1gene; Target site for trans-acting StDof1protein controlling guard cell-specific gene expression; KST1gene encodes a K+ influx channel of guard cells; See S000265; Motif found both in promoters of rolD; I box; "I-box"; Conserved sequence upstream of light-regulated genes; Conserved sequence upstream of light-regulated genes of both monocots and dicots; See IBOX (S000124); Consensus GT-1binding site in many light-regulated genes, e.g., RBCS from many species, PHYA from oat and rice, spinach RCA and PETA, and bean CHS15; R=A/G; W=A/T; For a compilation of related GT elements and factors, see Villain et al. (1996); GT-1can stabilize the TFIIA-TBP-DNA (TATA box) complex; The activation mechanism of GT-1may be achieved through direct interaction between TFIIA and GT-1; Binding of GT-1-like factors to the PR-1a promoter influences the level of SA-inducible gene expression; SEF4 binding site; Soybean (G.m.) consensus sequence found in 5'upstream region (-199) of beta-conglycinin (7S globulin) gene (Gmg17.1); "Binding with SEF4 (soybean embryo factor 4)"; R=A/G; TAAAG motif found in promoter of Solanum tuberosum (S.t.) KST1gene; Target site for trans-acting StDof1protein controlling guard cell-specific gene expression; KST1gene encodes a K+ influx channel of guard cells; See S000265; One of the consensus sequence motifs of organ-specific elements (OSE) characteristic of the promoters activated in infected cells of root nodules; See also S000467; SEF4 binding site; Soybean (G.m.) consensus sequence found in 5'upstream region (-199) of beta-conglycinin (7S globulin) gene (Gmg17.1); "Binding with SEF4 (soybean embryo factor 4)"; R=A/G; TAAAG motif found in promoter of Solanum tuberosum (S.t.) KST1gene; Target site for trans-acting StDof1protein controlling guard cell-specific gene expression; KST1gene encodes a K+ influx channel of guard cells; See S000265; W-box found in promoter of Arabidopsis thaliana (A.t.) NPR1gene; Located between +70 and +79 in tandem; They were recognized specifically by salicylic acid (SA)-induced WRKY DNA binding proteins; See S000142(SQ=TTGACC); See S000310 (SQ=TTTGACY); A cluster of WRKY binding sites act as negative regulatory elements for the inducible expression of AtWRKY18 (Chena and Chen, 2002); See also S000142; OsBP-5 (a MYC protein) binding site in Wx promoter; hexamer motif of Arabidopsis thaliana (A.t.) histone H4 promoter; Octamer motif found in promoter of wheat (T.a.) histone genes H3and H4, and corn histone genes H3and H4; Arabidopsis histone H4; "histone-specific octamer"; About half of the Oct motifs are present together with another element, HexA, TCA or CCAAT-box, forming OCES (Oct-containing composite elements); Core of GCC-box found in many pathogen-responsive genes such as PDF1.2, Thi2.1, and PR4; Has been shown to function as ethylene-responsive element; See S000036, S000232, S000332; Appears to play important roles in regulating jasmonate-responsive gene expression; Tomato Pti4 (ERF) regulates defence-related gene expression via GCC box and non-GCC box cis elements (Myb1(GTTAGTT) and G-box(CACGTG)); CGCG box recognized by AtSR1-6 (Arabidopsis thaliana signal-responsive |
| RT | RT1660 | 1660 | CC1 | ATATT    | 7.12E-05   | 0.00003965 | 42781 | 94  | 6190  | 1   | 0.00013889 | ROOTMOTIFTAPOX1    |                                                                                                                                                                                                                                                                                                                                                                                                                                                                                                                                                                                                                                                                                                                                                                                                                                                                                                                                                                                                                                                                                                                                                                                                                                                                                                                                                                                                                                                                                                                                                                                                                                                                                                                                                                                                                                                                                                                                                                                                                                                                                                                                                                                                                                                                                                                                                                                                                                                                                                                                                                                                                                                                                                                                                                                                                                                                                                                                                                                                                                                                                                                                                                                                                                                                                                                                                              |
| RT | RT1660 | 1660 | CC1 | GATAA    | 0.00015201 | 0.00008305 | 42124 | 93  | 6847  | 2   | 0.00013889 | IBOXCORE           |                                                                                                                                                                                                                                                                                                                                                                                                                                                                                                                                                                                                                                                                                                                                                                                                                                                                                                                                                                                                                                                                                                                                                                                                                                                                                                                                                                                                                                                                                                                                                                                                                                                                                                                                                                                                                                                                                                                                                                                                                                                                                                                                                                                                                                                                                                                                                                                                                                                                                                                                                                                                                                                                                                                                                                                                                                                                                                                                                                                                                                                                                                                                                                                                                                                                                                                                                              |
| RT | RT1660 | 1660 | CC1 | GRWAAW   | 0.00016982 | 0.00010904 | 43280 | 94  | 5691  | 1   | 0.00013889 | GT1CONSENSUS       |                                                                                                                                                                                                                                                                                                                                                                                                                                                                                                                                                                                                                                                                                                                                                                                                                                                                                                                                                                                                                                                                                                                                                                                                                                                                                                                                                                                                                                                                                                                                                                                                                                                                                                                                                                                                                                                                                                                                                                                                                                                                                                                                                                                                                                                                                                                                                                                                                                                                                                                                                                                                                                                                                                                                                                                                                                                                                                                                                                                                                                                                                                                                                                                                                                                                                                                                                              |
| RT | RT1660 | 1660 | CC1 | RTTTTTR  | 0.0001804  | 0.00011145 | 41357 | 92  | 7614  | 3   | 0.00013889 | SEF4MOTIFGM7S      |                                                                                                                                                                                                                                                                                                                                                                                                                                                                                                                                                                                                                                                                                                                                                                                                                                                                                                                                                                                                                                                                                                                                                                                                                                                                                                                                                                                                                                                                                                                                                                                                                                                                                                                                                                                                                                                                                                                                                                                                                                                                                                                                                                                                                                                                                                                                                                                                                                                                                                                                                                                                                                                                                                                                                                                                                                                                                                                                                                                                                                                                                                                                                                                                                                                                                                                                                              |
| RT | RT1660 | 1660 | CC1 | TAAAG    | 0.00015209 | 9.25E-05   | 42180 | 93  | 6791  | 2   | 0.00013889 | TAAAGSTKST1        |                                                                                                                                                                                                                                                                                                                                                                                                                                                                                                                                                                                                                                                                                                                                                                                                                                                                                                                                                                                                                                                                                                                                                                                                                                                                                                                                                                                                                                                                                                                                                                                                                                                                                                                                                                                                                                                                                                                                                                                                                                                                                                                                                                                                                                                                                                                                                                                                                                                                                                                                                                                                                                                                                                                                                                                                                                                                                                                                                                                                                                                                                                                                                                                                                                                                                                                                                              |
| RT | RT1664 | 1664 | CC1 | CTCTT    | 0.00014996 | 7.91E-05   | 42075 | 62  | 6929  | 0   | 0.00013889 | OSE2ROOTNODULE     |                                                                                                                                                                                                                                                                                                                                                                                                                                                                                                                                                                                                                                                                                                                                                                                                                                                                                                                                                                                                                                                                                                                                                                                                                                                                                                                                                                                                                                                                                                                                                                                                                                                                                                                                                                                                                                                                                                                                                                                                                                                                                                                                                                                                                                                                                                                                                                                                                                                                                                                                                                                                                                                                                                                                                                                                                                                                                                                                                                                                                                                                                                                                                                                                                                                                                                                                                              |
| RT | RT1664 | 1664 | CC1 | RTTTTTR  | 5.70E-05   | 0.00002847 | 41387 | 62  | 7617  | 0   | 0.00013889 | SEF4MOTIFGM7S      |                                                                                                                                                                                                                                                                                                                                                                                                                                                                                                                                                                                                                                                                                                                                                                                                                                                                                                                                                                                                                                                                                                                                                                                                                                                                                                                                                                                                                                                                                                                                                                                                                                                                                                                                                                                                                                                                                                                                                                                                                                                                                                                                                                                                                                                                                                                                                                                                                                                                                                                                                                                                                                                                                                                                                                                                                                                                                                                                                                                                                                                                                                                                                                                                                                                                                                                                                              |
| RT | RT1664 | 1664 | CC1 | TAAAG    | 0.0001494  | 9.66E-05   | 42211 | 62  | 6793  | 0   | 0.00013889 | TAAAGSTKST1        |                                                                                                                                                                                                                                                                                                                                                                                                                                                                                                                                                                                                                                                                                                                                                                                                                                                                                                                                                                                                                                                                                                                                                                                                                                                                                                                                                                                                                                                                                                                                                                                                                                                                                                                                                                                                                                                                                                                                                                                                                                                                                                                                                                                                                                                                                                                                                                                                                                                                                                                                                                                                                                                                                                                                                                                                                                                                                                                                                                                                                                                                                                                                                                                                                                                                                                                                                              |
| RT | RT1664 | 1664 | CC1 | TTGAC    | 0.00015637 | 9.09E-05   | 40403 | 61  | 8601  | 1   | 0.00013889 | WBOXATNPR1         |                                                                                                                                                                                                                                                                                                                                                                                                                                                                                                                                                                                                                                                                                                                                                                                                                                                                                                                                                                                                                                                                                                                                                                                                                                                                                                                                                                                                                                                                                                                                                                                                                                                                                                                                                                                                                                                                                                                                                                                                                                                                                                                                                                                                                                                                                                                                                                                                                                                                                                                                                                                                                                                                                                                                                                                                                                                                                                                                                                                                                                                                                                                                                                                                                                                                                                                                                              |
| XY | XY249  | 249  | CC1 | CAACGTG  | 8.38E-05   | 0.00006819 | 2523  | 48  | 46035 | 460 | 0.00013889 | BP5OSWX            | CGCG box recognized by AtSR1-6 (Arabidopsis thaliana signal-responsive                                                                                                                                                                                                                                                                                                                                                                                                                                                                                                                                                                                                                                                                                                                                                                                                                                                                                                                                                                                                                                                                                                                                                                                                                                                                                                                                                                                                                                                                                                                                                                                                                                                                                                                                                                                                                                                                                                                                                                                                                                                                                                                                                                                                                                                                                                                                                                                                                                                                                                                                                                                                                                                                                                                                                                                                                                                                                                                                                                                                                                                                                                                                                                                                                                                                                       |
| XY | XY249  | 249  | CC1 | CCGTGCG  | 1.67E-05   | 1.15E-05   | 3266  | 61  | 45292 | 447 | 0.00013889 | HEXAMERATH4        |                                                                                                                                                                                                                                                                                                                                                                                                                                                                                                                                                                                                                                                                                                                                                                                                                                                                                                                                                                                                                                                                                                                                                                                                                                                                                                                                                                                                                                                                                                                                                                                                                                                                                                                                                                                                                                                                                                                                                                                                                                                                                                                                                                                                                                                                                                                                                                                                                                                                                                                                                                                                                                                                                                                                                                                                                                                                                                                                                                                                                                                                                                                                                                                                                                                                                                                                                              |
| XY | XY249  | 249  | CC1 | CGCGGATC | 0.00012434 | 0.00012434 | 172   | 9   | 48386 | 499 | 0.00013889 | OCTAMERMOTIFTAH3H4 |                                                                                                                                                                                                                                                                                                                                                                                                                                                                                                                                                                                                                                                                                                                                                                                                                                                                                                                                                                                                                                                                                                                                                                                                                                                                                                                                                                                                                                                                                                                                                                                                                                                                                                                                                                                                                                                                                                                                                                                                                                                                                                                                                                                                                                                                                                                                                                                                                                                                                                                                                                                                                                                                                                                                                                                                                                                                                                                                                                                                                                                                                                                                                                                                                                                                                                                                                              |
| XY | XY249  | 249  | CC1 | GCCGCC   | 2.12E-05   | 1.49E-05   | 4490  | 77  | 44068 | 431 | 0.00013889 | GCCCORE            |                                                                                                                                                                                                                                                                                                                                                                                                                                                                                                                                                                                                                                                                                                                                                                                                                                                                                                                                                                                                                                                                                                                                                                                                                                                                                                                                                                                                                                                                                                                                                                                                                                                                                                                                                                                                                                                                                                                                                                                                                                                                                                                                                                                                                                                                                                                                                                                                                                                                                                                                                                                                                                                                                                                                                                                                                                                                                                                                                                                                                                                                                                                                                                                                                                                                                                                                                              |
| XY | XY249  | 249  | CC1 | VCGCGB   | 3.96E-05   | 2.58E-05   | 10975 | 155 | 37583 | 353 | 0.00013889 | CGCGBOXAT          |                                                                                                                                                                                                                                                                                                                                                                                                                                                                                                                                                                                                                                                                                                                                                                                                                                                                                                                                                                                                                                                                                                                                                                                                                                                                                                                                                                                                                                                                                                                                                                                                                                                                                                                                                                                                                                                                                                                                                                                                                                                                                                                                                                                                                                                                                                                                                                                                                                                                                                                                                                                                                                                                                                                                                                                                                                                                                                                                                                                                                                                                                                                                                                                                                                                                                                                                                              |





|    |        |      |     |          |            |            |       |     |       |     |            |                  |                                                                                                                                                                                                                                                                                                                                                                                                                                                                                                                                                                                                                                                                                                                                                                                                                                                                                                                                                                                                                                                                                                                                                                                                                                                                                                                                                                                                                                                                                                                                                                                                                                                                                                                                                                                                                                                                                                                                                                                                                                                                                                                                                                                                                                                                                                                                                                                                                                                                                                                                                                                                                                                                                                                                                                                                                                                                                                                                                                                                                                                                                                                                                                                                                                                                                                                                                                                                                                                                                                                                                                |
|----|--------|------|-----|----------|------------|------------|-------|-----|-------|-----|------------|------------------|----------------------------------------------------------------------------------------------------------------------------------------------------------------------------------------------------------------------------------------------------------------------------------------------------------------------------------------------------------------------------------------------------------------------------------------------------------------------------------------------------------------------------------------------------------------------------------------------------------------------------------------------------------------------------------------------------------------------------------------------------------------------------------------------------------------------------------------------------------------------------------------------------------------------------------------------------------------------------------------------------------------------------------------------------------------------------------------------------------------------------------------------------------------------------------------------------------------------------------------------------------------------------------------------------------------------------------------------------------------------------------------------------------------------------------------------------------------------------------------------------------------------------------------------------------------------------------------------------------------------------------------------------------------------------------------------------------------------------------------------------------------------------------------------------------------------------------------------------------------------------------------------------------------------------------------------------------------------------------------------------------------------------------------------------------------------------------------------------------------------------------------------------------------------------------------------------------------------------------------------------------------------------------------------------------------------------------------------------------------------------------------------------------------------------------------------------------------------------------------------------------------------------------------------------------------------------------------------------------------------------------------------------------------------------------------------------------------------------------------------------------------------------------------------------------------------------------------------------------------------------------------------------------------------------------------------------------------------------------------------------------------------------------------------------------------------------------------------------------------------------------------------------------------------------------------------------------------------------------------------------------------------------------------------------------------------------------------------------------------------------------------------------------------------------------------------------------------------------------------------------------------------------------------------------------------|
| XY | XY256  | 256  | CC2 | GAGTGAG  | 1.54E-06   | 1.54E-06   | 5385  | 22  | 43614 | 45  | 0.00013889 | SORLIP5AT        | <p>one of "Sequences Over-Represented in Light-Induced Promoters (SORLIPs) in Arabidopsis; Computationally identified phyA-induced motifs; See also S000482, S000483, S000484, S000485 (all SORLIPs), and also S000487, S000488, S000489, S000490 (all SORLREPs); Over-represented in both light-induced cotyledon-specific and root-specific genes (Jiao et al. 2005; see S000482);</p> <p>BS1(binding site 1) found in E. gunnii Cinnamoyl-CoA reductase (CCR) gene promoter; nuclear protein binding site; Required for vascular expression; OsBP-5 (a MYC protein) binding site in Wx promoter;</p> <p>Core of GCC-box found in many pathogen-responsive genes such as PDF1.2, Thi2.1, and PR4; Has been shown to function as ethylene-responsive element; See S000036, S000232, S000332; Appears to play important roles in regulating jasmonate-responsive gene expression; Tomato Pti4 (ERF) regulates defence-related gene expression via GCC box and non-GCC box cis elements (Myb1(GTTAGTT) and G-box(CACGTG));</p> <p>CGCG box recognized by AtSR1-6 (Arabidopsis thaliana signal-responsive genes); Multiple CGCG elements are found in promoters of many genes; Ca++/calmodulin binds to all AtSRs; V=A/C/G; B=G/T/C;</p> <p>one of "Sequences Over-Represented in Light-Induced Promoters (SORLIPs) in Arabidopsis; Computationally identified phyA-induced motifs; See also S000482, S000483, S000484, S000485 (all SORLIPs), and also S000487, S000488, S000489, S000490 (all SORLREPs); Over-represented in both light-induced cotyledon-specific and root-specific genes (Jiao et al. 2005; see S000482);</p> <p>OsBP-5 (a MYC protein) binding site in Wx promoter;</p> <p>Core of GCC-box found in many pathogen-responsive genes such as PDF1.2, Thi2.1, and PR4; Has been shown to function as ethylene-responsive element; See S000036, S000232, S000332; Appears to play important roles in regulating jasmonate-responsive gene expression; Tomato Pti4 (ERF) regulates defence-related gene expression via GCC box and non-GCC box cis elements (Myb1(GTTAGTT) and G-box(CACGTG));</p> <p>CGCG box recognized by AtSR1-6 (Arabidopsis thaliana signal-responsive genes); Multiple CGCG elements are found in promoters of many genes; Ca++/calmodulin binds to all AtSRs; V=A/C/G; B=G/T/C;</p> <p>one of "Sequences Over-Represented in Light-Induced Promoters (SORLIPs) in Arabidopsis; Computationally identified phyA-induced motifs; See also S000482, S000483, S000484, S000485 (all SORLIPs), and also S000487, S000488, S000489, S000490 (all SORLREPs); Over-represented in both light-induced cotyledon-specific and root-specific genes (Jiao et al. 2005; see S000482);</p> <p>One of 16 motifs found in silico in promoters of 13anaerobic genes involved in the fermentative pathway (anaerobic set 1)(Mohanty et al., 2005); Arbitrary named ANAERO1CONSENSUS by the PLACEdb curator; See also S000478, S000479, S000480, S000481;</p> <p>Up2motif found in 193of the 1184 up-regulated genes after main stem decapitation in Arabidopsis; W=A/T; See also S000470, S000471;</p> <p>REalpha found in Lemna gibba Lhcb21gene promoter; Located at -134 to -129; Binding site of proteins of whole-cell extracts; The DNA binding activity is high in etiolated plants but much lower in green plants; Required for phytochrome regulation; See S000363;</p> <p>PolyA signal; poly A signal found in legA gene of pea, rice alpha-amylase; -10 to -30 in the case of animal genes. Near upstream elements (NUE) in</p> |
|    | XY257  | 257  | CC1 | AGCGGG   | 0.00015024 | 0.00010373 | 4235  | 73  | 44298 | 460 | 0.00013889 | BS1EGCCR         |                                                                                                                                                                                                                                                                                                                                                                                                                                                                                                                                                                                                                                                                                                                                                                                                                                                                                                                                                                                                                                                                                                                                                                                                                                                                                                                                                                                                                                                                                                                                                                                                                                                                                                                                                                                                                                                                                                                                                                                                                                                                                                                                                                                                                                                                                                                                                                                                                                                                                                                                                                                                                                                                                                                                                                                                                                                                                                                                                                                                                                                                                                                                                                                                                                                                                                                                                                                                                                                                                                                                                                |
|    | XY257  | 257  | CC1 | CAACGTG  | 0.00017339 | 0.00011275 | 2522  | 49  | 46011 | 484 | 0.00013889 | BP5OSWX          |                                                                                                                                                                                                                                                                                                                                                                                                                                                                                                                                                                                                                                                                                                                                                                                                                                                                                                                                                                                                                                                                                                                                                                                                                                                                                                                                                                                                                                                                                                                                                                                                                                                                                                                                                                                                                                                                                                                                                                                                                                                                                                                                                                                                                                                                                                                                                                                                                                                                                                                                                                                                                                                                                                                                                                                                                                                                                                                                                                                                                                                                                                                                                                                                                                                                                                                                                                                                                                                                                                                                                                |
| XY | XY257  | 257  | CC1 | GCCGCC   | 0.00011999 | 7.71E-05   | 4490  | 77  | 44043 | 456 | 0.00013889 | GCCCORE          |                                                                                                                                                                                                                                                                                                                                                                                                                                                                                                                                                                                                                                                                                                                                                                                                                                                                                                                                                                                                                                                                                                                                                                                                                                                                                                                                                                                                                                                                                                                                                                                                                                                                                                                                                                                                                                                                                                                                                                                                                                                                                                                                                                                                                                                                                                                                                                                                                                                                                                                                                                                                                                                                                                                                                                                                                                                                                                                                                                                                                                                                                                                                                                                                                                                                                                                                                                                                                                                                                                                                                                |
| XY | XY257  | 257  | CC1 | VCGCGB   | 5.70E-06   | 3.77E-06   | 10964 | 166 | 37569 | 367 | 0.00013889 | CGCGBOXAT        |                                                                                                                                                                                                                                                                                                                                                                                                                                                                                                                                                                                                                                                                                                                                                                                                                                                                                                                                                                                                                                                                                                                                                                                                                                                                                                                                                                                                                                                                                                                                                                                                                                                                                                                                                                                                                                                                                                                                                                                                                                                                                                                                                                                                                                                                                                                                                                                                                                                                                                                                                                                                                                                                                                                                                                                                                                                                                                                                                                                                                                                                                                                                                                                                                                                                                                                                                                                                                                                                                                                                                                |
| XY | XY257  | 257  | CC2 | GAGTGAG  | 2.68E-06   | 2.68E-06   | 5386  | 21  | 43616 | 43  | 0.00013889 | SORLIP5AT        |                                                                                                                                                                                                                                                                                                                                                                                                                                                                                                                                                                                                                                                                                                                                                                                                                                                                                                                                                                                                                                                                                                                                                                                                                                                                                                                                                                                                                                                                                                                                                                                                                                                                                                                                                                                                                                                                                                                                                                                                                                                                                                                                                                                                                                                                                                                                                                                                                                                                                                                                                                                                                                                                                                                                                                                                                                                                                                                                                                                                                                                                                                                                                                                                                                                                                                                                                                                                                                                                                                                                                                |
|    | XY258  | 258  | CC1 | CAACGTG  | 7.25E-05   | 0.00005352 | 2523  | 48  | 46040 | 455 | 0.00013889 | BP5OSWX          |                                                                                                                                                                                                                                                                                                                                                                                                                                                                                                                                                                                                                                                                                                                                                                                                                                                                                                                                                                                                                                                                                                                                                                                                                                                                                                                                                                                                                                                                                                                                                                                                                                                                                                                                                                                                                                                                                                                                                                                                                                                                                                                                                                                                                                                                                                                                                                                                                                                                                                                                                                                                                                                                                                                                                                                                                                                                                                                                                                                                                                                                                                                                                                                                                                                                                                                                                                                                                                                                                                                                                                |
| XY | XY258  | 258  | CC1 | GCCGCC   | 2.73E-05   | 1.88E-05   | 4491  | 76  | 44072 | 427 | 0.00013889 | GCCCORE          |                                                                                                                                                                                                                                                                                                                                                                                                                                                                                                                                                                                                                                                                                                                                                                                                                                                                                                                                                                                                                                                                                                                                                                                                                                                                                                                                                                                                                                                                                                                                                                                                                                                                                                                                                                                                                                                                                                                                                                                                                                                                                                                                                                                                                                                                                                                                                                                                                                                                                                                                                                                                                                                                                                                                                                                                                                                                                                                                                                                                                                                                                                                                                                                                                                                                                                                                                                                                                                                                                                                                                                |
| XY | XY258  | 258  | CC1 | VCGCGB   | 9.83E-07   | 5.36E-07   | 10968 | 162 | 37595 | 341 | 0.00013889 | CGCGBOXAT        |                                                                                                                                                                                                                                                                                                                                                                                                                                                                                                                                                                                                                                                                                                                                                                                                                                                                                                                                                                                                                                                                                                                                                                                                                                                                                                                                                                                                                                                                                                                                                                                                                                                                                                                                                                                                                                                                                                                                                                                                                                                                                                                                                                                                                                                                                                                                                                                                                                                                                                                                                                                                                                                                                                                                                                                                                                                                                                                                                                                                                                                                                                                                                                                                                                                                                                                                                                                                                                                                                                                                                                |
| XY | XY258  | 258  | CC3 | GAGTGAG  | 6.76E-06   | 6.76E-06   | 5394  | 13  | 43642 | 17  | 0.00013889 | SORLIP5AT        |                                                                                                                                                                                                                                                                                                                                                                                                                                                                                                                                                                                                                                                                                                                                                                                                                                                                                                                                                                                                                                                                                                                                                                                                                                                                                                                                                                                                                                                                                                                                                                                                                                                                                                                                                                                                                                                                                                                                                                                                                                                                                                                                                                                                                                                                                                                                                                                                                                                                                                                                                                                                                                                                                                                                                                                                                                                                                                                                                                                                                                                                                                                                                                                                                                                                                                                                                                                                                                                                                                                                                                |
| XY | XY1063 | 1063 | CC1 | AAACAAA  | 7.89E-06   | 4.72E-06   | 34643 | 75  | 14341 | 7   | 0.00013889 | ANAERO1CONSENSUS |                                                                                                                                                                                                                                                                                                                                                                                                                                                                                                                                                                                                                                                                                                                                                                                                                                                                                                                                                                                                                                                                                                                                                                                                                                                                                                                                                                                                                                                                                                                                                                                                                                                                                                                                                                                                                                                                                                                                                                                                                                                                                                                                                                                                                                                                                                                                                                                                                                                                                                                                                                                                                                                                                                                                                                                                                                                                                                                                                                                                                                                                                                                                                                                                                                                                                                                                                                                                                                                                                                                                                                |
| XY | XY1063 | 1063 | CC1 | AAACCCTA | 9.98E-06   | 9.98E-06   | 6398  | 26  | 42586 | 56  | 0.00013889 | UP2ATMSD         |                                                                                                                                                                                                                                                                                                                                                                                                                                                                                                                                                                                                                                                                                                                                                                                                                                                                                                                                                                                                                                                                                                                                                                                                                                                                                                                                                                                                                                                                                                                                                                                                                                                                                                                                                                                                                                                                                                                                                                                                                                                                                                                                                                                                                                                                                                                                                                                                                                                                                                                                                                                                                                                                                                                                                                                                                                                                                                                                                                                                                                                                                                                                                                                                                                                                                                                                                                                                                                                                                                                                                                |
| XY | XY1063 | 1063 | CC1 | AACCAA   | 0.00019374 | 0.00011919 | 33465 | 71  | 15519 | 11  | 0.00013889 | REALPHALGLHCB21  |                                                                                                                                                                                                                                                                                                                                                                                                                                                                                                                                                                                                                                                                                                                                                                                                                                                                                                                                                                                                                                                                                                                                                                                                                                                                                                                                                                                                                                                                                                                                                                                                                                                                                                                                                                                                                                                                                                                                                                                                                                                                                                                                                                                                                                                                                                                                                                                                                                                                                                                                                                                                                                                                                                                                                                                                                                                                                                                                                                                                                                                                                                                                                                                                                                                                                                                                                                                                                                                                                                                                                                |
| XY | XY1063 | 1063 | CC1 | AATAAA   | 5.92E-05   | 0.00003161 | 41755 | 81  | 7229  | 1   | 0.00013889 | POLASIG1         |                                                                                                                                                                                                                                                                                                                                                                                                                                                                                                                                                                                                                                                                                                                                                                                                                                                                                                                                                                                                                                                                                                                                                                                                                                                                                                                                                                                                                                                                                                                                                                                                                                                                                                                                                                                                                                                                                                                                                                                                                                                                                                                                                                                                                                                                                                                                                                                                                                                                                                                                                                                                                                                                                                                                                                                                                                                                                                                                                                                                                                                                                                                                                                                                                                                                                                                                                                                                                                                                                                                                                                |

|    |        |      |     |           |            |            |       |     |       |    |            |                  |                                                                                                                                                                                                                                                                                                                                                                                                                                                                                                                                                                                                                                                                                                                                                                                                                                                                                                                                                                                                                                                                                                                                                                                                                                                                                                                                                                                                                                                                                                                                                                                                                                                                                                                                                                                                                                                                                                                                                                                                                                                                                                                                                                                                                                                                                                                                                                                                                                                                                                                                                                                                                                                                                                                                                                                                                                                                                                                                                                                                                                                                                                                                                                                                                                                                                                                                          |
|----|--------|------|-----|-----------|------------|------------|-------|-----|-------|----|------------|------------------|------------------------------------------------------------------------------------------------------------------------------------------------------------------------------------------------------------------------------------------------------------------------------------------------------------------------------------------------------------------------------------------------------------------------------------------------------------------------------------------------------------------------------------------------------------------------------------------------------------------------------------------------------------------------------------------------------------------------------------------------------------------------------------------------------------------------------------------------------------------------------------------------------------------------------------------------------------------------------------------------------------------------------------------------------------------------------------------------------------------------------------------------------------------------------------------------------------------------------------------------------------------------------------------------------------------------------------------------------------------------------------------------------------------------------------------------------------------------------------------------------------------------------------------------------------------------------------------------------------------------------------------------------------------------------------------------------------------------------------------------------------------------------------------------------------------------------------------------------------------------------------------------------------------------------------------------------------------------------------------------------------------------------------------------------------------------------------------------------------------------------------------------------------------------------------------------------------------------------------------------------------------------------------------------------------------------------------------------------------------------------------------------------------------------------------------------------------------------------------------------------------------------------------------------------------------------------------------------------------------------------------------------------------------------------------------------------------------------------------------------------------------------------------------------------------------------------------------------------------------------------------------------------------------------------------------------------------------------------------------------------------------------------------------------------------------------------------------------------------------------------------------------------------------------------------------------------------------------------------------------------------------------------------------------------------------------------------------|
| XY | XY1063 | 1063 | CC1 | AATAAT    | 3.53E-06   | 2.28E-06   | 40337 | 81  | 8647  | 1  | 0.00013889 | POLASIG3         | <p>Arabidopsis (Loke et al. 2005);</p> <p>Plant polyA signal; Consensus sequence for plant polyadenylation signal; One of the consensus sequence motifs of organ-specific elements (OSE) characteristic of the promoters activated in infected cells of root nodules; See also S000467;</p> <p>Up1motif found in 162of the 1184 up-regulated genes after main stem decapitation in Arabidopsis; W=A/T; See also S000470, S000472; one of "Sequences Over-Represented in Light-Induced Promoters (SORLIPs) in Arabidopsis; Computationally identified phyA-induced motifs; See also S000482, S000484, S000485, S000486 (all SORLIPs), and also S000487, S000488, S000489, S000490 (all SORLREPs); SEF4 binding site; Soybean (G.m.) consensus sequence found in 5'upstream region (-199) of beta-conglycinin (7S globulin) gene (Gmg17.1); "Binding with SEF4 (soybean embryo factor 4)"; R=A/G;</p> <p>TAAAG motif found in promoter of Solanum tuberosum (S.t.) KST1gene; Target site for trans-acting StDof1protein controlling guard cell-specific gene expression; KST1gene encodes a K+ influx channel of guard cells; See S000265;</p> <p>The sequence critical for Cytokinin-enhanced Protein Binding in vitro, found in -490 to -340 of the promoter of the cucumber (CS) POR (NADPH-protochlorophyllide reductase) gene;</p> <p>SUSIBA2bind to W-box element in barley iso1(encoding isoamylase1) promoter;</p> <p>One of 16 motifs found in silico in promoters of 13anaerobic genes involved in the fermentative pathway (anaerobic set 1)(Mohanty et al., 2005); Arbitrary named ANAERO1CONSENSUS by the PLACEdb curator; See also S000478, S000479, S000480, S000481;</p> <p>Up2motif found in 193of the 1184 up-regulated genes after main stem decapitation in Arabidopsis; W=A/T; See also S000470, S000471;</p> <p>PolyA signal; poly A signal found in legA gene of pea, rice alpha-amylase; -10 to -30 in the case of animal genes. Near upstream elements (NUE) in Arabidopsis (Loke et al. 2005);</p> <p>Plant polyA signal; Consensus sequence for plant polyadenylation signal; One of two co-dependent regulatory elements responsible for pollen specific activation of tomato (L.e.) lat52gene; Found at -72to -68 region; See S000246 (POLLEN2LELAT52); AGAAA and TCCACCATA (S000246) are required for pollen specific expression; Also found in the promoter of tomato endo-beta-mannanase gene (LeMAN5) gene (Filichkin et al. 2004);</p> <p>Motif found both in promoters of rolD;</p> <p>SEF1(soybean embryo factor 1) binding motif; sequence found in 5'-upstream region (-640; -765) of soybean beta-conglycinin (7S globulin) gene; W=A/T;</p> <p>One of the consensus sequence motifs of organ-specific elements (OSE) characteristic of the promoters activated in infected cells of root nodules; See also S000467;</p> <p>GT-1motif found in the promoter of soybean (Glycine max) CaM isoform, SCaM-4; Plays a role in pathogen- and salt-induced SCaM-4 gene expression; See also S000198 (GT-1consensus);</p> <p>SEF4 binding site; Soybean (G.m.) consensus sequence found in 5'upstream region (-199) of beta-conglycinin (7S globulin) gene (Gmg17.1); "Binding with SEF4 (soybean embryo factor 4)"; R=A/G;</p> <p>TAAAG motif found in promoter of Solanum tuberosum (S.t.) KST1gene;</p> |
| XY | XY1063 | 1063 | CC1 | CTCTT     | 0.00009258 | 5.44E-05   | 42056 | 81  | 6928  | 1  | 0.00013889 | OSE2ROOTNODULE   |                                                                                                                                                                                                                                                                                                                                                                                                                                                                                                                                                                                                                                                                                                                                                                                                                                                                                                                                                                                                                                                                                                                                                                                                                                                                                                                                                                                                                                                                                                                                                                                                                                                                                                                                                                                                                                                                                                                                                                                                                                                                                                                                                                                                                                                                                                                                                                                                                                                                                                                                                                                                                                                                                                                                                                                                                                                                                                                                                                                                                                                                                                                                                                                                                                                                                                                                          |
| XY | XY1063 | 1063 | CC1 | GGCCCAWW  | 0.00011894 | 0.00011894 | 2979  | 15  | 46005 | 67 | 0.00013889 | UP1ATMSD         |                                                                                                                                                                                                                                                                                                                                                                                                                                                                                                                                                                                                                                                                                                                                                                                                                                                                                                                                                                                                                                                                                                                                                                                                                                                                                                                                                                                                                                                                                                                                                                                                                                                                                                                                                                                                                                                                                                                                                                                                                                                                                                                                                                                                                                                                                                                                                                                                                                                                                                                                                                                                                                                                                                                                                                                                                                                                                                                                                                                                                                                                                                                                                                                                                                                                                                                                          |
| XY | XY1063 | 1063 | CC1 | GGGCC     | 0.00001043 | 7.31E-06   | 18563 | 51  | 30421 | 31 | 0.00013889 | SORLIP2AT        |                                                                                                                                                                                                                                                                                                                                                                                                                                                                                                                                                                                                                                                                                                                                                                                                                                                                                                                                                                                                                                                                                                                                                                                                                                                                                                                                                                                                                                                                                                                                                                                                                                                                                                                                                                                                                                                                                                                                                                                                                                                                                                                                                                                                                                                                                                                                                                                                                                                                                                                                                                                                                                                                                                                                                                                                                                                                                                                                                                                                                                                                                                                                                                                                                                                                                                                                          |
| XY | XY1063 | 1063 | CC1 | RTTTTTR   | 0.00019481 | 0.0001248  | 41369 | 80  | 7615  | 2  | 0.00013889 | SEF4MOTIFGM7S    |                                                                                                                                                                                                                                                                                                                                                                                                                                                                                                                                                                                                                                                                                                                                                                                                                                                                                                                                                                                                                                                                                                                                                                                                                                                                                                                                                                                                                                                                                                                                                                                                                                                                                                                                                                                                                                                                                                                                                                                                                                                                                                                                                                                                                                                                                                                                                                                                                                                                                                                                                                                                                                                                                                                                                                                                                                                                                                                                                                                                                                                                                                                                                                                                                                                                                                                                          |
| XY | XY1063 | 1063 | CC1 | TAAAG     | 0.00014828 | 6.93E-05   | 42192 | 81  | 6792  | 1  | 0.00013889 | TAAAGSTKST1      |                                                                                                                                                                                                                                                                                                                                                                                                                                                                                                                                                                                                                                                                                                                                                                                                                                                                                                                                                                                                                                                                                                                                                                                                                                                                                                                                                                                                                                                                                                                                                                                                                                                                                                                                                                                                                                                                                                                                                                                                                                                                                                                                                                                                                                                                                                                                                                                                                                                                                                                                                                                                                                                                                                                                                                                                                                                                                                                                                                                                                                                                                                                                                                                                                                                                                                                                          |
| XY | XY1063 | 1063 | CC1 | TATTAG    | 0.00019267 | 9.71E-05   | 27636 | 63  | 21348 | 19 | 0.00013889 | CPBCSPOR         |                                                                                                                                                                                                                                                                                                                                                                                                                                                                                                                                                                                                                                                                                                                                                                                                                                                                                                                                                                                                                                                                                                                                                                                                                                                                                                                                                                                                                                                                                                                                                                                                                                                                                                                                                                                                                                                                                                                                                                                                                                                                                                                                                                                                                                                                                                                                                                                                                                                                                                                                                                                                                                                                                                                                                                                                                                                                                                                                                                                                                                                                                                                                                                                                                                                                                                                                          |
| XY | XY1063 | 1063 | CC1 | TGACT     | 0.00014916 | 9.75E-05   | 38266 | 77  | 10718 | 5  | 0.00013889 | WBOXHVISO1       | <p>One of 16 motifs found in silico in promoters of 13anaerobic genes involved in the fermentative pathway (anaerobic set 1)(Mohanty et al., 2005); Arbitrary named ANAERO1CONSENSUS by the PLACEdb curator; See also S000478, S000479, S000480, S000481;</p> <p>Up2motif found in 193of the 1184 up-regulated genes after main stem decapitation in Arabidopsis; W=A/T; See also S000470, S000471;</p> <p>PolyA signal; poly A signal found in legA gene of pea, rice alpha-amylase; -10 to -30 in the case of animal genes. Near upstream elements (NUE) in Arabidopsis (Loke et al. 2005);</p> <p>Plant polyA signal; Consensus sequence for plant polyadenylation signal; One of two co-dependent regulatory elements responsible for pollen specific activation of tomato (L.e.) lat52gene; Found at -72to -68 region; See S000246 (POLLEN2LELAT52); AGAAA and TCCACCATA (S000246) are required for pollen specific expression; Also found in the promoter of tomato endo-beta-mannanase gene (LeMAN5) gene (Filichkin et al. 2004);</p> <p>Motif found both in promoters of rolD;</p> <p>SEF1(soybean embryo factor 1) binding motif; sequence found in 5'-upstream region (-640; -765) of soybean beta-conglycinin (7S globulin) gene; W=A/T;</p> <p>One of the consensus sequence motifs of organ-specific elements (OSE) characteristic of the promoters activated in infected cells of root nodules; See also S000467;</p> <p>GT-1motif found in the promoter of soybean (Glycine max) CaM isoform, SCaM-4; Plays a role in pathogen- and salt-induced SCaM-4 gene expression; See also S000198 (GT-1consensus);</p> <p>SEF4 binding site; Soybean (G.m.) consensus sequence found in 5'upstream region (-199) of beta-conglycinin (7S globulin) gene (Gmg17.1); "Binding with SEF4 (soybean embryo factor 4)"; R=A/G;</p> <p>TAAAG motif found in promoter of Solanum tuberosum (S.t.) KST1gene;</p>                                                                                                                                                                                                                                                                                                                                                                                                                                                                                                                                                                                                                                                                                                                                                                                                                                                                                                                                                                                                                                                                                                                                                                                                                                                                                                                                                                                                                          |
| XY | XY1064 | 1064 | CC1 | AAACAAA   | 1.91E-07   | 1.01E-07   | 34619 | 99  | 14339 | 9  | 0.00013889 | ANAERO1CONSENSUS |                                                                                                                                                                                                                                                                                                                                                                                                                                                                                                                                                                                                                                                                                                                                                                                                                                                                                                                                                                                                                                                                                                                                                                                                                                                                                                                                                                                                                                                                                                                                                                                                                                                                                                                                                                                                                                                                                                                                                                                                                                                                                                                                                                                                                                                                                                                                                                                                                                                                                                                                                                                                                                                                                                                                                                                                                                                                                                                                                                                                                                                                                                                                                                                                                                                                                                                                          |
| XY | XY1064 | 1064 | CC1 | AAACCCTA  | 1.99E-06   | 1.73E-06   | 6391  | 33  | 42567 | 75 | 0.00013889 | UP2ATMSD         |                                                                                                                                                                                                                                                                                                                                                                                                                                                                                                                                                                                                                                                                                                                                                                                                                                                                                                                                                                                                                                                                                                                                                                                                                                                                                                                                                                                                                                                                                                                                                                                                                                                                                                                                                                                                                                                                                                                                                                                                                                                                                                                                                                                                                                                                                                                                                                                                                                                                                                                                                                                                                                                                                                                                                                                                                                                                                                                                                                                                                                                                                                                                                                                                                                                                                                                                          |
| XY | XY1064 | 1064 | CC1 | AATAAA    | 0.00001452 | 6.31E-06   | 41730 | 106 | 7228  | 2  | 0.00013889 | POLASIG1         |                                                                                                                                                                                                                                                                                                                                                                                                                                                                                                                                                                                                                                                                                                                                                                                                                                                                                                                                                                                                                                                                                                                                                                                                                                                                                                                                                                                                                                                                                                                                                                                                                                                                                                                                                                                                                                                                                                                                                                                                                                                                                                                                                                                                                                                                                                                                                                                                                                                                                                                                                                                                                                                                                                                                                                                                                                                                                                                                                                                                                                                                                                                                                                                                                                                                                                                                          |
| XY | XY1064 | 1064 | CC1 | AATAAT    | 2.02E-05   | 1.07E-05   | 40314 | 104 | 8644  | 4  | 0.00013889 | POLASIG3         | <p>One of two co-dependent regulatory elements responsible for pollen specific activation of tomato (L.e.) lat52gene; Found at -72to -68 region; See S000246 (POLLEN2LELAT52); AGAAA and TCCACCATA (S000246) are required for pollen specific expression; Also found in the promoter of tomato endo-beta-mannanase gene (LeMAN5) gene (Filichkin et al. 2004);</p> <p>Motif found both in promoters of rolD;</p> <p>SEF1(soybean embryo factor 1) binding motif; sequence found in 5'-upstream region (-640; -765) of soybean beta-conglycinin (7S globulin) gene; W=A/T;</p> <p>One of the consensus sequence motifs of organ-specific elements (OSE) characteristic of the promoters activated in infected cells of root nodules; See also S000467;</p> <p>GT-1motif found in the promoter of soybean (Glycine max) CaM isoform, SCaM-4; Plays a role in pathogen- and salt-induced SCaM-4 gene expression; See also S000198 (GT-1consensus);</p> <p>SEF4 binding site; Soybean (G.m.) consensus sequence found in 5'upstream region (-199) of beta-conglycinin (7S globulin) gene (Gmg17.1); "Binding with SEF4 (soybean embryo factor 4)"; R=A/G;</p> <p>TAAAG motif found in promoter of Solanum tuberosum (S.t.) KST1gene;</p>                                                                                                                                                                                                                                                                                                                                                                                                                                                                                                                                                                                                                                                                                                                                                                                                                                                                                                                                                                                                                                                                                                                                                                                                                                                                                                                                                                                                                                                                                                                                                                                                                                                                                                                                                                                                                                                                                                                                                                                                                                                                                                     |
| XY | XY1064 | 1064 | CC1 | AGAAA     | 0.00026335 | 0.00013795 | 43126 | 106 | 5832  | 2  | 0.00013889 | POLLEN1LELAT52   |                                                                                                                                                                                                                                                                                                                                                                                                                                                                                                                                                                                                                                                                                                                                                                                                                                                                                                                                                                                                                                                                                                                                                                                                                                                                                                                                                                                                                                                                                                                                                                                                                                                                                                                                                                                                                                                                                                                                                                                                                                                                                                                                                                                                                                                                                                                                                                                                                                                                                                                                                                                                                                                                                                                                                                                                                                                                                                                                                                                                                                                                                                                                                                                                                                                                                                                                          |
| XY | XY1064 | 1064 | CC1 | ATATT     | 1.45E-05   | 7.71E-06   | 42768 | 107 | 6190  | 1  | 0.00013889 | ROOTMOTIFTAPOX1  |                                                                                                                                                                                                                                                                                                                                                                                                                                                                                                                                                                                                                                                                                                                                                                                                                                                                                                                                                                                                                                                                                                                                                                                                                                                                                                                                                                                                                                                                                                                                                                                                                                                                                                                                                                                                                                                                                                                                                                                                                                                                                                                                                                                                                                                                                                                                                                                                                                                                                                                                                                                                                                                                                                                                                                                                                                                                                                                                                                                                                                                                                                                                                                                                                                                                                                                                          |
| XY | XY1064 | 1064 | CC1 | ATATTTAWW | 0.00013235 | 8.54E-05   | 21317 | 67  | 27641 | 41 | 0.00013889 | SEF1MOTIF        |                                                                                                                                                                                                                                                                                                                                                                                                                                                                                                                                                                                                                                                                                                                                                                                                                                                                                                                                                                                                                                                                                                                                                                                                                                                                                                                                                                                                                                                                                                                                                                                                                                                                                                                                                                                                                                                                                                                                                                                                                                                                                                                                                                                                                                                                                                                                                                                                                                                                                                                                                                                                                                                                                                                                                                                                                                                                                                                                                                                                                                                                                                                                                                                                                                                                                                                                          |
| XY | XY1064 | 1064 | CC1 | CTCTT     | 0.0000215  | 1.25E-05   | 42031 | 106 | 6927  | 2  | 0.00013889 | OSE2ROOTNODULE   | <p>GT-1motif found in the promoter of soybean (Glycine max) CaM isoform, SCaM-4; Plays a role in pathogen- and salt-induced SCaM-4 gene expression; See also S000198 (GT-1consensus);</p> <p>SEF4 binding site; Soybean (G.m.) consensus sequence found in 5'upstream region (-199) of beta-conglycinin (7S globulin) gene (Gmg17.1); "Binding with SEF4 (soybean embryo factor 4)"; R=A/G;</p> <p>TAAAG motif found in promoter of Solanum tuberosum (S.t.) KST1gene;</p>                                                                                                                                                                                                                                                                                                                                                                                                                                                                                                                                                                                                                                                                                                                                                                                                                                                                                                                                                                                                                                                                                                                                                                                                                                                                                                                                                                                                                                                                                                                                                                                                                                                                                                                                                                                                                                                                                                                                                                                                                                                                                                                                                                                                                                                                                                                                                                                                                                                                                                                                                                                                                                                                                                                                                                                                                                                               |
| XY | XY1064 | 1064 | CC1 | GAAAAA    | 6.47E-05   | 2.77E-05   | 41548 | 105 | 7410  | 3  | 0.00013889 | GT1GMSCAM4       |                                                                                                                                                                                                                                                                                                                                                                                                                                                                                                                                                                                                                                                                                                                                                                                                                                                                                                                                                                                                                                                                                                                                                                                                                                                                                                                                                                                                                                                                                                                                                                                                                                                                                                                                                                                                                                                                                                                                                                                                                                                                                                                                                                                                                                                                                                                                                                                                                                                                                                                                                                                                                                                                                                                                                                                                                                                                                                                                                                                                                                                                                                                                                                                                                                                                                                                                          |
| XY | XY1064 | 1064 | CC1 | RGATY     | 5.33E-05   | 3.36E-05   | 43402 | 107 | 5556  | 1  | 0.00013889 |                  | <p>SEF4 binding site; Soybean (G.m.) consensus sequence found in 5'upstream region (-199) of beta-conglycinin (7S globulin) gene (Gmg17.1); "Binding with SEF4 (soybean embryo factor 4)"; R=A/G;</p> <p>TAAAG motif found in promoter of Solanum tuberosum (S.t.) KST1gene;</p>                                                                                                                                                                                                                                                                                                                                                                                                                                                                                                                                                                                                                                                                                                                                                                                                                                                                                                                                                                                                                                                                                                                                                                                                                                                                                                                                                                                                                                                                                                                                                                                                                                                                                                                                                                                                                                                                                                                                                                                                                                                                                                                                                                                                                                                                                                                                                                                                                                                                                                                                                                                                                                                                                                                                                                                                                                                                                                                                                                                                                                                         |
| XY | XY1064 | 1064 | CC1 | RTTTTTR   | 2.74E-05   | 1.79E-05   | 41344 | 105 | 7614  | 3  | 0.00013889 | SEF4MOTIFGM7S    |                                                                                                                                                                                                                                                                                                                                                                                                                                                                                                                                                                                                                                                                                                                                                                                                                                                                                                                                                                                                                                                                                                                                                                                                                                                                                                                                                                                                                                                                                                                                                                                                                                                                                                                                                                                                                                                                                                                                                                                                                                                                                                                                                                                                                                                                                                                                                                                                                                                                                                                                                                                                                                                                                                                                                                                                                                                                                                                                                                                                                                                                                                                                                                                                                                                                                                                                          |
| XY | XY1064 | 1064 | CC1 | TAAAG     | 3.33E-05   | 1.69E-05   | 42167 | 106 | 6791  | 2  | 0.00013889 | TAAAGSTKST1      |                                                                                                                                                                                                                                                                                                                                                                                                                                                                                                                                                                                                                                                                                                                                                                                                                                                                                                                                                                                                                                                                                                                                                                                                                                                                                                                                                                                                                                                                                                                                                                                                                                                                                                                                                                                                                                                                                                                                                                                                                                                                                                                                                                                                                                                                                                                                                                                                                                                                                                                                                                                                                                                                                                                                                                                                                                                                                                                                                                                                                                                                                                                                                                                                                                                                                                                                          |

|    |        |      |     |           |            |            |       |     |       |    |            |                  |
|----|--------|------|-----|-----------|------------|------------|-------|-----|-------|----|------------|------------------|
| XY | XY1064 | 1064 | CC1 | TAATMATTA | 0.0001776  | 0.00011842 | 8533  | 35  | 40425 | 73 | 0.00013889 | HDZIP2ATATHB2    |
| XY | XY1064 | 1064 | CC1 | TATTAG    | 0.00008572 | 4.84E-05   | 27618 | 81  | 21340 | 27 | 0.00013889 | CPBCSPOR         |
| XY | XY1064 | 1064 | CC1 | TATTTAA   | 2.14E-05   | 1.24E-05   | 28376 | 84  | 20582 | 24 | 0.00013889 | TATABOXOSPAL     |
| XY | XY1064 | 1064 | CC1 | TGACT     | 2.07E-05   | 1.30E-05   | 38242 | 101 | 10716 | 7  | 0.00013889 | WBOXHVISO1       |
| XY | XY1064 | 1064 | CC1 | TGACY     | 9.42E-05   | 5.73E-05   | 41889 | 105 | 7069  | 3  | 0.00013889 | WBOXNTERF3       |
| XY | XY1064 | 1064 | CC1 | TTATTT    | 9.66E-05   | 0.00004323 | 41756 | 105 | 7202  | 3  | 0.00013889 | TATABOX5         |
| XY | XY1065 | 1065 | CC1 | AAACAAA   | 1.17E-08   | 5.40E-09   | 34608 | 110 | 14339 | 9  | 0.00013889 | ANAERO1CONSENSUS |
| XY | XY1065 | 1065 | CC1 | AAACCCTA  | 0.00002698 | 0.00001717 | 6391  | 33  | 42556 | 86 | 0.00013889 | UP2ATMSD         |
| XY | XY1065 | 1065 | CC1 | AATAAA    | 2.16E-05   | 9.34E-06   | 41720 | 116 | 7227  | 3  | 0.00013889 | POLASIG1         |
| XY | XY1065 | 1065 | CC1 | AATAAT    | 1.73E-05   | 9.52E-06   | 40304 | 114 | 8643  | 5  | 0.00013889 | POLASIG3         |
| XY | XY1065 | 1065 | CC1 | AGAAA     | 8.71E-05   | 4.10E-05   | 43115 | 117 | 5832  | 2  | 0.00013889 | POLLEN1LELAT52   |
| XY | XY1065 | 1065 | CC1 | ATATT     | 2.87E-06   | 1.91E-06   | 42757 | 118 | 6190  | 1  | 0.00013889 | ROOTMOTIFTAPOX1  |
| XY | XY1065 | 1065 | CC1 | CANNTG    | 0.00016076 | 7.46E-05   | 42611 | 116 | 6336  | 3  | 0.00013889 | MYCCONSENSUSAT   |
| XY | XY1065 | 1065 | CC1 | CTCTT     | 4.48E-06   | 0.0000028  | 42020 | 117 | 6927  | 2  | 0.00013889 | OSE2ROOTNODULE   |
| XY | XY1065 | 1065 | CC1 | GAAAAA    | 9.14E-06   | 6.02E-06   | 41537 | 116 | 7410  | 3  | 0.00013889 | GT1GMSCAM4       |

Target site for trans-acting StDof1protein controlling guard cell-specific gene expression; KST1gene encodes a K+ influx channel of guard cells; See S000265;

Binding site of the Arabidopsis (A.T.) homeobox gene (ATHB-2) found in its own promoter; Located between -72and -80; Similar to the HD-ZIP-2binding consensus sequence; ATHB-2is regulated by light signals which function as a negative autoregulator of its own gene; M=C/A;

The sequence critical for Cytokinin-enhanced Protein Binding in vitro, found in -490 to -340 of the promoter of the cucumber (CS) POR (NADPH-protochlorophyllide reductase) gene;

Binding site for OstBP2, found in the promoter of rice pal gene encoding phenylalanine ammonia-lyase; OstFIIB stimulated the DNA binding and bending activities of OstBP2and synergistically enhanced OstBP2-mediated transcription from the pal promoter;

SUSIBA2bind to W-box element in barley iso1(encoding isoamylase1) promoter;

W box found in the promoter region of a transcriptional repressor ERF3gene in tobacco; May be involved in activation of ERF3gene by wounding;(Nishiuchi et al., 2004) Y=C/T; See S000142, S000390, S000442, S000447;

TATA box; TATA box found in the 5'upstream region of pea (Pisum sativum) glutamine synthetase gene; a functional TATA element by in vivo analysis;

One of 16 motifs found in silico in promoters of 13anaerobic genes involved in the fermentative pathway (anaerobic set 1)(Mohanty et al., 2005);

Arbitrary named ANAERO1CONSENSUS by the PLACEdb curator; See also S000478, S000479, S000480, S000481;

Up2motif found in 193of the 1184 up-regulated genes after main stem decapitation in Arabidopsis; W=A/T; See also S000470, S000471;

PolyA signal; poly A signal found in legA gene of pea, rice alpha-amylase; -10 to -30 in the case of animal genes. Near upstream elements (NUE) in Arabidopsis (Loke et al. 2005);

Plant polyA signal; Consensus sequence for plant polyadenylation signal;

One of two co-dependent regulatory elements responsible for pollen specific activation of tomato (L.e.) lat52gene; Found at -72to -68 region; See S000246 (POLLEN2LELAT52); AGAAA and TCCACCATA (S000246) are required for pollen specific expression; Also found in the promoter of tomato endo-beta-mannanase gene (LeMAN5) gene (Filichkin et al. 2004);

Motif found both in promoters of rolD;

MYC recognition site found in the promoters of the dehydration-responsive gene rd22and many other genes in Arabidopsis; Binding site of ATMYC2(previously known as rd22BP1); see S000144 (E-box; CANNTG), S000174 (MYCATRD22); N=A/T/G/C; MYC recognition sequence in CBF3promoter; Binding site of ICE1(inducer of CBF expression 1) that regulates the transcription of CBF/DREB1genes in the cold in Arabidopsis; ICE1(Chinnusamy et al., 2004);) This sequence is also known as RRE (R response element)(Hartmann et al., 2005);

One of the consensus sequence motifs of organ-specific elements (OSE) characteristic of the promoters activated in infected cells of root nodules; See also S000467;

GT-1motif found in the promoter of soybean (Glycine max) CaM isoform, SCaM-4; Plays a role in pathogen- and salt-induced SCaM-4 gene expression; See also S000198 (GT-1consensus);

|    |        |      |     |          |            |            |       |     |       |    |            |                  |                                                                                                                                                                                                                                                                                                                                                                                                                                                                                                                                                                                                                                                                                                                                                                                                                                                                                                                                                                                                                                                                                                                                                                                                                                                                                                                                                                                                                                                                                                                                                                                                                                                                                                                                                                                                                                                                                                                                                                                                                                                                                                                                                                                                                                                                                                                                                                                                                                                                                                                                                                                                                                                                                                                                                                                                              |
|----|--------|------|-----|----------|------------|------------|-------|-----|-------|----|------------|------------------|--------------------------------------------------------------------------------------------------------------------------------------------------------------------------------------------------------------------------------------------------------------------------------------------------------------------------------------------------------------------------------------------------------------------------------------------------------------------------------------------------------------------------------------------------------------------------------------------------------------------------------------------------------------------------------------------------------------------------------------------------------------------------------------------------------------------------------------------------------------------------------------------------------------------------------------------------------------------------------------------------------------------------------------------------------------------------------------------------------------------------------------------------------------------------------------------------------------------------------------------------------------------------------------------------------------------------------------------------------------------------------------------------------------------------------------------------------------------------------------------------------------------------------------------------------------------------------------------------------------------------------------------------------------------------------------------------------------------------------------------------------------------------------------------------------------------------------------------------------------------------------------------------------------------------------------------------------------------------------------------------------------------------------------------------------------------------------------------------------------------------------------------------------------------------------------------------------------------------------------------------------------------------------------------------------------------------------------------------------------------------------------------------------------------------------------------------------------------------------------------------------------------------------------------------------------------------------------------------------------------------------------------------------------------------------------------------------------------------------------------------------------------------------------------------------------|
| XY | XY1065 | 1065 | CC1 | GRWAAW   | 0.00013315 | 5.75E-05   | 43257 | 117 | 5690  | 2  | 0.00013889 | GT1CONSENSUS     | Consensus GT-1binding site in many light-regulated genes, e.g., RBCS from many species, PHYA from oat and rice, spinach RCA and PETA, and bean CHS15; R=A/G; W=A/T; For a compilation of related GT elements and factors, see Villain et al. (1996); GT-1can stabilize the TFIIA-TBP-DNA (TATA box) complex; The activation mechanism of GT-1may be achieved through direct interaction between TFIIA and GT-1; Binding of GT-1-like factors to the PR-1a promoter influences the level of SA-inducible gene expression;                                                                                                                                                                                                                                                                                                                                                                                                                                                                                                                                                                                                                                                                                                                                                                                                                                                                                                                                                                                                                                                                                                                                                                                                                                                                                                                                                                                                                                                                                                                                                                                                                                                                                                                                                                                                                                                                                                                                                                                                                                                                                                                                                                                                                                                                                     |
| XY | XY1065 | 1065 | CC1 | RGATY    | 1.63E-05   | 9.79E-06   | 43391 | 118 | 5556  | 1  | 0.00013889 |                  |                                                                                                                                                                                                                                                                                                                                                                                                                                                                                                                                                                                                                                                                                                                                                                                                                                                                                                                                                                                                                                                                                                                                                                                                                                                                                                                                                                                                                                                                                                                                                                                                                                                                                                                                                                                                                                                                                                                                                                                                                                                                                                                                                                                                                                                                                                                                                                                                                                                                                                                                                                                                                                                                                                                                                                                                              |
| XY | XY1065 | 1065 | CC1 | RTTTTTR  | 7.65E-07   | 4.86E-07   | 41332 | 117 | 7615  | 2  | 0.00013889 | SEF4MOTIFGM7S    | SEF4 binding site; Soybean (G.m.) consensus sequence found in 5'upstream region (-199) of beta-conglycinin (7S globulin) gene (Gmg17.1); "Binding with SEF4 (soybean embryo factor 4)"; R=A/G; TAAAG motif found in promoter of Solanum tuberosum (S.t.) KST1gene; Target site for trans-acting StDof1protein controlling guard cell-specific gene expression; KST1gene encodes a K+ influx channel of guard cells; See S000265; The sequence critical for Cytokinin-enhanced Protein Binding in vitro, found in -490 to -340 of the promoter of the cucumber (CS) POR (NADPH-protochlorophyllide reductase) gene; Binding site for OsTBP2, found in the promoter of rice pal gene encoding phenylalanine ammonia-lyase; OsTFIIB stimulated the DNA binding and bending activities of OsTBP2and synergistically enhanced OsTBP2-mediated transcription from the pal promoter; SUSIBA2bind to W-box element in barley iso1(encoding isoamylase1) promoter; W box found in the promoter region of a transcriptional repressor ERF3gene in tobacco; May be involved in activation of ERF3gene by wounding;(Nishiuchi et al., 2004) Y=C/T; See S000142, S000390, S000442, S000447; TATA box; TATA box found in the 5'upstream region of pea (Pisum sativum) glutamine synthetase gene; a functional TATA element by in vivo analysis; NRR (negative regulatory region) in promoter region of Brassica napus (B.n.) extA extensin gene; Removal of this region leads to expression in all tissues within the stem internode, petiole and root; One of 16 motifs found in silico in promoters of 13anaerobic genes involved in the fermentative pathway (anaerobic set 1)(Mohanty et al., 2005); Arbitrary named ANAERO1CONSENSUS by the PLACEdb curator; See also S000478, S000479, S000480, S000481; Up2motif found in 193of the 1184 up-regulated genes after main stem decapitation in Arabidopsis; W=A/T; See also S000470, S000471; PolyA signal; poly A signal found in legA gene of pea, rice alpha-amylase; -10 to -30 in the case of animal genes. Near upstream elements (NUE) in Arabidopsis (Loke et al. 2005); Plant polyA signal; Consensus sequence for plant polyadenylation signal; One of two co-dependent regulatory elements responsible for pollen specific activation of tomato (L.e.) lat52gene; Found at -72to -68 region; See S000246 (POLLEN2LELAT52); AGAAA and TCCACCATA (S000246) are required for pollen specific expression; Also found in the promoter of tomato endo-beta-mannanase gene (LeMAN5) gene (Filichkin et al. 2004); Motif found both in promoters of rolD; MYC recognition site found in the promoters of the dehydration-responsive gene rd22and many other genes in Arabidopsis; Binding site of ATMYC2(previously known as rd22BP1); see S000144 (E-box; CANNTG), |
| XY | XY1065 | 1065 | CC1 | TAAAG    | 6.88E-06   | 3.94E-06   | 42156 | 117 | 6791  | 2  | 0.00013889 | TAAAGSTKST1      |                                                                                                                                                                                                                                                                                                                                                                                                                                                                                                                                                                                                                                                                                                                                                                                                                                                                                                                                                                                                                                                                                                                                                                                                                                                                                                                                                                                                                                                                                                                                                                                                                                                                                                                                                                                                                                                                                                                                                                                                                                                                                                                                                                                                                                                                                                                                                                                                                                                                                                                                                                                                                                                                                                                                                                                                              |
| XY | XY1065 | 1065 | CC1 | TATTAG   | 1.68E-05   | 1.05E-05   | 27609 | 90  | 21338 | 29 | 0.00013889 | CPBCSPOR         |                                                                                                                                                                                                                                                                                                                                                                                                                                                                                                                                                                                                                                                                                                                                                                                                                                                                                                                                                                                                                                                                                                                                                                                                                                                                                                                                                                                                                                                                                                                                                                                                                                                                                                                                                                                                                                                                                                                                                                                                                                                                                                                                                                                                                                                                                                                                                                                                                                                                                                                                                                                                                                                                                                                                                                                                              |
| XY | XY1065 | 1065 | CC1 | TATTTAA  | 1.47E-05   | 0.00000765 | 28368 | 92  | 20579 | 27 | 0.00013889 | TATABOXOSPAL     |                                                                                                                                                                                                                                                                                                                                                                                                                                                                                                                                                                                                                                                                                                                                                                                                                                                                                                                                                                                                                                                                                                                                                                                                                                                                                                                                                                                                                                                                                                                                                                                                                                                                                                                                                                                                                                                                                                                                                                                                                                                                                                                                                                                                                                                                                                                                                                                                                                                                                                                                                                                                                                                                                                                                                                                                              |
| XY | XY1065 | 1065 | CC1 | TGACT    | 0.00004909 | 2.48E-05   | 38233 | 110 | 10714 | 9  | 0.00013889 | WBOXHVIS01       |                                                                                                                                                                                                                                                                                                                                                                                                                                                                                                                                                                                                                                                                                                                                                                                                                                                                                                                                                                                                                                                                                                                                                                                                                                                                                                                                                                                                                                                                                                                                                                                                                                                                                                                                                                                                                                                                                                                                                                                                                                                                                                                                                                                                                                                                                                                                                                                                                                                                                                                                                                                                                                                                                                                                                                                                              |
| XY | XY1065 | 1065 | CC1 | TGACY    | 2.11E-05   | 1.36E-05   | 41878 | 116 | 7069  | 3  | 0.00013889 | WBOXNTERF3       |                                                                                                                                                                                                                                                                                                                                                                                                                                                                                                                                                                                                                                                                                                                                                                                                                                                                                                                                                                                                                                                                                                                                                                                                                                                                                                                                                                                                                                                                                                                                                                                                                                                                                                                                                                                                                                                                                                                                                                                                                                                                                                                                                                                                                                                                                                                                                                                                                                                                                                                                                                                                                                                                                                                                                                                                              |
| XY | XY1065 | 1065 | CC1 | TTATTT   | 2.13E-05   | 9.91E-06   | 41745 | 116 | 7202  | 3  | 0.00013889 | TATABOX5         |                                                                                                                                                                                                                                                                                                                                                                                                                                                                                                                                                                                                                                                                                                                                                                                                                                                                                                                                                                                                                                                                                                                                                                                                                                                                                                                                                                                                                                                                                                                                                                                                                                                                                                                                                                                                                                                                                                                                                                                                                                                                                                                                                                                                                                                                                                                                                                                                                                                                                                                                                                                                                                                                                                                                                                                                              |
| XY | XY1065 | 1065 | CC2 | TAGTGGAT | 9.92E-05   | 9.92E-05   | 1787  | 12  | 47190 | 77 | 0.00013889 | NRRBNEXTA        |                                                                                                                                                                                                                                                                                                                                                                                                                                                                                                                                                                                                                                                                                                                                                                                                                                                                                                                                                                                                                                                                                                                                                                                                                                                                                                                                                                                                                                                                                                                                                                                                                                                                                                                                                                                                                                                                                                                                                                                                                                                                                                                                                                                                                                                                                                                                                                                                                                                                                                                                                                                                                                                                                                                                                                                                              |
| XY | XY1066 | 1066 | CC1 | AAACAAA  | 2.66E-08   | 1.21E-08   | 34611 | 107 | 14339 | 9  | 0.00013889 | ANAERO1CONSENSUS |                                                                                                                                                                                                                                                                                                                                                                                                                                                                                                                                                                                                                                                                                                                                                                                                                                                                                                                                                                                                                                                                                                                                                                                                                                                                                                                                                                                                                                                                                                                                                                                                                                                                                                                                                                                                                                                                                                                                                                                                                                                                                                                                                                                                                                                                                                                                                                                                                                                                                                                                                                                                                                                                                                                                                                                                              |
| XY | XY1066 | 1066 | CC1 | AAACCCTA | 8.01E-05   | 0.00006586 | 6393  | 31  | 42557 | 85 | 0.00013889 | UP2ATMSD         |                                                                                                                                                                                                                                                                                                                                                                                                                                                                                                                                                                                                                                                                                                                                                                                                                                                                                                                                                                                                                                                                                                                                                                                                                                                                                                                                                                                                                                                                                                                                                                                                                                                                                                                                                                                                                                                                                                                                                                                                                                                                                                                                                                                                                                                                                                                                                                                                                                                                                                                                                                                                                                                                                                                                                                                                              |
| XY | XY1066 | 1066 | CC1 | AATAAA   | 3.12E-05   | 1.40E-05   | 41723 | 113 | 7227  | 3  | 0.00013889 | POLASIG1         | POLASIG3                                                                                                                                                                                                                                                                                                                                                                                                                                                                                                                                                                                                                                                                                                                                                                                                                                                                                                                                                                                                                                                                                                                                                                                                                                                                                                                                                                                                                                                                                                                                                                                                                                                                                                                                                                                                                                                                                                                                                                                                                                                                                                                                                                                                                                                                                                                                                                                                                                                                                                                                                                                                                                                                                                                                                                                                     |
| XY | XY1066 | 1066 | CC1 | AATAAT   | 2.49E-05   | 0.00001506 | 40307 | 111 | 8643  | 5  | 0.00013889 |                  |                                                                                                                                                                                                                                                                                                                                                                                                                                                                                                                                                                                                                                                                                                                                                                                                                                                                                                                                                                                                                                                                                                                                                                                                                                                                                                                                                                                                                                                                                                                                                                                                                                                                                                                                                                                                                                                                                                                                                                                                                                                                                                                                                                                                                                                                                                                                                                                                                                                                                                                                                                                                                                                                                                                                                                                                              |
| XY | XY1066 | 1066 | CC1 | AGAAA    | 0.00012911 | 5.72E-05   | 43118 | 114 | 5832  | 2  | 0.00013889 | POLLEN1LELAT52   | ROOTMOTIFTAPOX1                                                                                                                                                                                                                                                                                                                                                                                                                                                                                                                                                                                                                                                                                                                                                                                                                                                                                                                                                                                                                                                                                                                                                                                                                                                                                                                                                                                                                                                                                                                                                                                                                                                                                                                                                                                                                                                                                                                                                                                                                                                                                                                                                                                                                                                                                                                                                                                                                                                                                                                                                                                                                                                                                                                                                                                              |
| XY | XY1066 | 1066 | CC1 | ATATT    | 0.00005717 | 0.00002478 | 42761 | 114 | 6189  | 2  | 0.00013889 |                  |                                                                                                                                                                                                                                                                                                                                                                                                                                                                                                                                                                                                                                                                                                                                                                                                                                                                                                                                                                                                                                                                                                                                                                                                                                                                                                                                                                                                                                                                                                                                                                                                                                                                                                                                                                                                                                                                                                                                                                                                                                                                                                                                                                                                                                                                                                                                                                                                                                                                                                                                                                                                                                                                                                                                                                                                              |
| XY | XY1066 | 1066 | CC1 | CANNTG   | 0.00023307 | 0.00010521 | 42614 | 113 | 6336  | 3  | 0.00013889 | MYCCONSENSUSAT   |                                                                                                                                                                                                                                                                                                                                                                                                                                                                                                                                                                                                                                                                                                                                                                                                                                                                                                                                                                                                                                                                                                                                                                                                                                                                                                                                                                                                                                                                                                                                                                                                                                                                                                                                                                                                                                                                                                                                                                                                                                                                                                                                                                                                                                                                                                                                                                                                                                                                                                                                                                                                                                                                                                                                                                                                              |

|    |        |      |     |             |            |            |       |     |       |    |            |                |                                                                                                                                                                                                                                                                                                                                                                                                                                                                                                                                                                                                                                                                                                                                                                                                                                                                                                                                                                                                                                                                                                                                                                                                                                                                                                                                                                                                                                                                                                         |
|----|--------|------|-----|-------------|------------|------------|-------|-----|-------|----|------------|----------------|---------------------------------------------------------------------------------------------------------------------------------------------------------------------------------------------------------------------------------------------------------------------------------------------------------------------------------------------------------------------------------------------------------------------------------------------------------------------------------------------------------------------------------------------------------------------------------------------------------------------------------------------------------------------------------------------------------------------------------------------------------------------------------------------------------------------------------------------------------------------------------------------------------------------------------------------------------------------------------------------------------------------------------------------------------------------------------------------------------------------------------------------------------------------------------------------------------------------------------------------------------------------------------------------------------------------------------------------------------------------------------------------------------------------------------------------------------------------------------------------------------|
|    |        |      |     |             |            |            |       |     |       |    |            |                | S000174 (MYCATRD22); N=A/T/G/C; MYC recognition sequence in CBF3promoter; Binding site of ICE1(inducer of CBF expression 1) that regulates the transcription of CBF/DREB1genes in the cold in Arabidopsis; ICE1(Chinnusamy et al., 2004);) This sequence is also known as RRE (R response element)(Hartmann et al., 2005); Common sequence found in the 5'-non-coding regions of eukaryotic genes; "CCAAT box" found in the promoter of heat shock protein genes; Located immediately upstream from the most distal HSE of the promoter; "CCAAT box" act cooperatively with HSEs to increase the hs promoter activity; One of the consensus sequence motifs of organ-specific elements (OSE) characteristic of the promoters activated in infected cells of root nodules; See also S000467; GT-1motif found in the promoter of soybean (Glycine max) CaM isoform, SCaM-4; Plays a role in pathogen- and salt-induced SCaM-4 gene expression; See also S000198 (GT-1consensus); Consensus GT-1binding site in many light-regulated genes, e.g., RBCS from many species, PHYA from oat and rice, spinach RCA and PETA, and bean CHS15; R=A/G; W=A/T; For a compilation of related GT elements and factors, see Villain et al. (1996); GT-1can stabilize the TFIIA-TBP-DNA (TATA box) complex; The activation mechanism of GT-1may be achieved through direct interaction between TFIIA and GT-1; Binding of GT-1-like factors to the PR-1a promoter influences the level of SA-inducible gene expression; |
| XY | XY1066 | 1066 | CC1 | CCAAT       | 0.00017751 | 0.00009982 | 40532 | 110 | 8418  | 6  | 0.00013889 | CCAATBOX1      |                                                                                                                                                                                                                                                                                                                                                                                                                                                                                                                                                                                                                                                                                                                                                                                                                                                                                                                                                                                                                                                                                                                                                                                                                                                                                                                                                                                                                                                                                                         |
| XY | XY1066 | 1066 | CC1 | CTCTT       | 6.64E-06   | 4.22E-06   | 42023 | 114 | 6927  | 2  | 0.00013889 | OSE2ROOTNODULE |                                                                                                                                                                                                                                                                                                                                                                                                                                                                                                                                                                                                                                                                                                                                                                                                                                                                                                                                                                                                                                                                                                                                                                                                                                                                                                                                                                                                                                                                                                         |
| XY | XY1066 | 1066 | CC1 | GAAAAA      | 0.00002063 | 9.15E-06   | 41540 | 113 | 7410  | 3  | 0.00013889 | GT1GMSCAM4     |                                                                                                                                                                                                                                                                                                                                                                                                                                                                                                                                                                                                                                                                                                                                                                                                                                                                                                                                                                                                                                                                                                                                                                                                                                                                                                                                                                                                                                                                                                         |
| XY | XY1066 | 1066 | CC1 | GRWAAW      | 0.00012542 | 7.94E-05   | 43260 | 114 | 5690  | 2  | 0.00013889 | GT1CONSENSUS   |                                                                                                                                                                                                                                                                                                                                                                                                                                                                                                                                                                                                                                                                                                                                                                                                                                                                                                                                                                                                                                                                                                                                                                                                                                                                                                                                                                                                                                                                                                         |
| XY | XY1066 | 1066 | CC1 | RGATY       | 0.00018678 | 0.00010832 | 43395 | 114 | 5555  | 2  | 0.00013889 |                |                                                                                                                                                                                                                                                                                                                                                                                                                                                                                                                                                                                                                                                                                                                                                                                                                                                                                                                                                                                                                                                                                                                                                                                                                                                                                                                                                                                                                                                                                                         |
| XY | XY1066 | 1066 | CC1 | RTTTTTR     | 1.15E-06   | 7.69E-07   | 41335 | 114 | 7615  | 2  | 0.00013889 | SEF4MOTIFGM7S  | SEF4 binding site; Soybean (G.m.) consensus sequence found in 5'upstream region (-199) of beta-conglycinin (7S globulin) gene (Gmg17.1); "Binding with SEF4 (soybean embryo factor 4)"; R=A/G; TAAAG motif found in promoter of Solanum tuberosum (S.t.) KST1gene; Target site for trans-acting StDof1protein controlling guard cell-specific gene expression; KST1gene encodes a K+ influx channel of guard cells; See S000265;                                                                                                                                                                                                                                                                                                                                                                                                                                                                                                                                                                                                                                                                                                                                                                                                                                                                                                                                                                                                                                                                        |
| XY | XY1066 | 1066 | CC1 | TAAAG       | 0.00001016 | 5.87E-06   | 42159 | 114 | 6791  | 2  | 0.00013889 | TAAAGSTKST1    | The sequence critical for Cytokinin-enhanced Protein Binding in vitro, found in -490 to -340 of the promoter of the cucumber (CS) POR (NADPH-protochlorophyllide reductase) gene;                                                                                                                                                                                                                                                                                                                                                                                                                                                                                                                                                                                                                                                                                                                                                                                                                                                                                                                                                                                                                                                                                                                                                                                                                                                                                                                       |
| XY | XY1066 | 1066 | CC1 | TATTAG      | 7.91E-06   | 4.21E-06   | 27610 | 89  | 21340 | 27 | 0.00013889 | CPBCSPOR       | Binding site for OsTBP2, found in the promoter of rice pal gene encoding phenylalanine ammonia-lyase; OsTFIIB stimulated the DNA binding and bending activities of OsTBP2and synergistically enhanced OsTBP2-mediated transcription from the pal promoter;                                                                                                                                                                                                                                                                                                                                                                                                                                                                                                                                                                                                                                                                                                                                                                                                                                                                                                                                                                                                                                                                                                                                                                                                                                              |
| XY | XY1066 | 1066 | CC1 | TATTTAA     | 1.74E-06   | 1.03E-06   | 28368 | 92  | 20582 | 24 | 0.00013889 | TATABOXOSPAL   | TATA box; TATA box found in the 5'upstream region of pea (Pisum sativum) glutamine synthetase gene; a functional TATA element by in vivo analysis;                                                                                                                                                                                                                                                                                                                                                                                                                                                                                                                                                                                                                                                                                                                                                                                                                                                                                                                                                                                                                                                                                                                                                                                                                                                                                                                                                      |
| XY | XY1066 | 1066 | CC1 | TTATTT      | 0.00003076 | 1.48E-05   | 41748 | 113 | 7202  | 3  | 0.00013889 | TATABOX5       | ARS element; Motif found in SAR (MAR);                                                                                                                                                                                                                                                                                                                                                                                                                                                                                                                                                                                                                                                                                                                                                                                                                                                                                                                                                                                                                                                                                                                                                                                                                                                                                                                                                                                                                                                                  |
| XY | XY1066 | 1066 | CC1 | WTTTATRTTTW | 8.47E-05   | 5.82E-05   | 12077 | 48  | 36873 | 68 | 0.00013889 | MARARS         | The sequence critical for Cytokinin-enhanced Protein Binding in vitro, found in -490 to -340 of the promoter of the cucumber (CS) POR (NADPH-protochlorophyllide reductase) gene;                                                                                                                                                                                                                                                                                                                                                                                                                                                                                                                                                                                                                                                                                                                                                                                                                                                                                                                                                                                                                                                                                                                                                                                                                                                                                                                       |
| XY | XY1076 | 1076 | CC1 | TATTAG      | 7.10E-05   | 5.00E-05   | 27658 | 41  | 21359 | 8  | 0.00013889 | CPBCSPOR       | Binding site of OsBIHD1, a rice BELL homeodomain transcription factor;                                                                                                                                                                                                                                                                                                                                                                                                                                                                                                                                                                                                                                                                                                                                                                                                                                                                                                                                                                                                                                                                                                                                                                                                                                                                                                                                                                                                                                  |
| XY | XY1076 | 1076 | CC1 | TGTCA       | 0.0001099  | 5.03E-05   | 40047 | 49  | 8970  | 0  | 0.00013889 | BIHD1OS        | PolyA signal; poly A signal found in legA gene of pea, rice alpha-amylase; -10 to -30 in the case of animal genes. Near upstream elements (NUE) in Arabidopsis (Loke et al. 2005);                                                                                                                                                                                                                                                                                                                                                                                                                                                                                                                                                                                                                                                                                                                                                                                                                                                                                                                                                                                                                                                                                                                                                                                                                                                                                                                      |
| XY | XY1077 | 1077 | CC1 | AATAAA      | 0.0002139  | 0.00013205 | 41780 | 56  | 7230  | 0  | 0.00013889 | POLASIG1       | Region necessary for circadian expression of tomato (L.e.) Lhc gene;                                                                                                                                                                                                                                                                                                                                                                                                                                                                                                                                                                                                                                                                                                                                                                                                                                                                                                                                                                                                                                                                                                                                                                                                                                                                                                                                                                                                                                    |
| XY | XY1077 | 1077 | CC1 | CAANNNNATC  | 0.000124   | 7.36E-05   | 31334 | 49  | 17676 | 7  | 0.00013889 | CIACADIANLELHC | TATA box; TATA box found in the 5'upstream region of pea (Pisum sativum) glutamine synthetase gene; a functional TATA element by in vivo analysis;                                                                                                                                                                                                                                                                                                                                                                                                                                                                                                                                                                                                                                                                                                                                                                                                                                                                                                                                                                                                                                                                                                                                                                                                                                                                                                                                                      |
| XY | XY1077 | 1077 | CC1 | TTATTT      | 0.00021445 | 0.00013654 | 41805 | 56  | 7205  | 0  | 0.00013889 | TATABOX5       | ABRE-related sequence or "Repeated sequence motifs" identified in the upstream regions of 162Ca(2+)-responsive upregulated genes; see also ABRE;                                                                                                                                                                                                                                                                                                                                                                                                                                                                                                                                                                                                                                                                                                                                                                                                                                                                                                                                                                                                                                                                                                                                                                                                                                                                                                                                                        |
| XY | XY1079 | 1079 | CC2 | MACGYGB     | 0.00013546 | 0.00009302 | 17011 | 24  | 32019 | 12 | 0.00013889 | ABRERATCAL     |                                                                                                                                                                                                                                                                                                                                                                                                                                                                                                                                                                                                                                                                                                                                                                                                                                                                                                                                                                                                                                                                                                                                                                                                                                                                                                                                                                                                                                                                                                         |

|    |        |      |     |         |            |            |       |    |       |    |            |                  |                                                                                                                                                                                                                                                                                                                                                                                                                                                                                                                                                                                                                                                                                                                                                                                                                                                                                                                                                                                                                                                                                                                                                                                                                                                                                                                                                                                                                                                                                                                                                                                                                                                                                                                                                                                                                                                                                                                                                                                                                                                                                                                                                                                                                                                                                                                                                                                                                                                                                                                                                                                                                                      |
|----|--------|------|-----|---------|------------|------------|-------|----|-------|----|------------|------------------|--------------------------------------------------------------------------------------------------------------------------------------------------------------------------------------------------------------------------------------------------------------------------------------------------------------------------------------------------------------------------------------------------------------------------------------------------------------------------------------------------------------------------------------------------------------------------------------------------------------------------------------------------------------------------------------------------------------------------------------------------------------------------------------------------------------------------------------------------------------------------------------------------------------------------------------------------------------------------------------------------------------------------------------------------------------------------------------------------------------------------------------------------------------------------------------------------------------------------------------------------------------------------------------------------------------------------------------------------------------------------------------------------------------------------------------------------------------------------------------------------------------------------------------------------------------------------------------------------------------------------------------------------------------------------------------------------------------------------------------------------------------------------------------------------------------------------------------------------------------------------------------------------------------------------------------------------------------------------------------------------------------------------------------------------------------------------------------------------------------------------------------------------------------------------------------------------------------------------------------------------------------------------------------------------------------------------------------------------------------------------------------------------------------------------------------------------------------------------------------------------------------------------------------------------------------------------------------------------------------------------------------|
| XY | XY1552 | 1552 | CC1 | GCCGCC  | 0.00011196 | 0.00011196 | 4555  | 12 | 44473 | 26 | 0.00013889 | GCCCORE          | M=C/A; Y=T/C; B=T/C/G;<br>Core of GCC-box found in many pathogen-responsive genes such as PDF1.2, Thi2.1, and PR4; Has been shown to function as ethylene-responsive element; See S000036, S000232, S000332; Appears to play important roles in regulating jasmonate-responsive gene expression; Tomato Pti4 (ERF) regulates defence-related gene expression via GCC box and non-GCC box cis elements (Myb1(GTTAGTT) and G-box(CACGTG));<br>Core of GCC-box found in many pathogen-responsive genes such as PDF1.2, Thi2.1, and PR4; Has been shown to function as ethylene-responsive element; See S000036, S000232, S000332; Appears to play important roles in regulating jasmonate-responsive gene expression; Tomato Pti4 (ERF) regulates defence-related gene expression via GCC box and non-GCC box cis elements (Myb1(GTTAGTT) and G-box(CACGTG));<br>Core of GCC-box found in many pathogen-responsive genes such as PDF1.2, Thi2.1, and PR4; Has been shown to function as ethylene-responsive element; See S000036, S000232, S000332; Appears to play important roles in regulating jasmonate-responsive gene expression; Tomato Pti4 (ERF) regulates defence-related gene expression via GCC box and non-GCC box cis elements (Myb1(GTTAGTT) and G-box(CACGTG));<br>Core of GCC-box found in many pathogen-responsive genes such as PDF1.2, Thi2.1, and PR4; Has been shown to function as ethylene-responsive element; See S000036, S000232, S000332; Appears to play important roles in regulating jasmonate-responsive gene expression; Tomato Pti4 (ERF) regulates defence-related gene expression via GCC box and non-GCC box cis elements (Myb1(GTTAGTT) and G-box(CACGTG));<br>Core of GCC-box found in many pathogen-responsive genes such as PDF1.2, Thi2.1, and PR4; Has been shown to function as ethylene-responsive element; See S000036, S000232, S000332; Appears to play important roles in regulating jasmonate-responsive gene expression; Tomato Pti4 (ERF) regulates defence-related gene expression via GCC box and non-GCC box cis elements (Myb1(GTTAGTT) and G-box(CACGTG));<br>One of 16 motifs found in silico in promoters of 13anaerobic genes involved in the fermentative pathway (anaerobic set 1)(Mohanty et al., 2005); Arbitrary named ANAERO1CONSENSUS by the PLACEdb curator; See also S000478, S000479, S000480, S000481;<br>One of 16 motifs found in silico in promoters of 13anaerobic genes involved in the fermentative pathway (anaerobic set 1)(Mohanty et al., 2005); Arbitrary named ANAERO1CONSENSUS by the PLACEdb curator; See also S000478, S000479, S000480, S000481; |
| XY | XY1555 | 1555 | CC1 | GCCGCC  | 1.17E-05   | 1.17E-05   | 4548  | 19 | 44449 | 50 | 0.00013889 | GCCCORE          |                                                                                                                                                                                                                                                                                                                                                                                                                                                                                                                                                                                                                                                                                                                                                                                                                                                                                                                                                                                                                                                                                                                                                                                                                                                                                                                                                                                                                                                                                                                                                                                                                                                                                                                                                                                                                                                                                                                                                                                                                                                                                                                                                                                                                                                                                                                                                                                                                                                                                                                                                                                                                                      |
| XY | XY1556 | 1556 | CC1 | GCCGCC  | 0.00002709 | 0.00002709 | 4547  | 20 | 44440 | 59 | 0.00013889 | GCCCORE          |                                                                                                                                                                                                                                                                                                                                                                                                                                                                                                                                                                                                                                                                                                                                                                                                                                                                                                                                                                                                                                                                                                                                                                                                                                                                                                                                                                                                                                                                                                                                                                                                                                                                                                                                                                                                                                                                                                                                                                                                                                                                                                                                                                                                                                                                                                                                                                                                                                                                                                                                                                                                                                      |
| XY | XY1557 | 1557 | CC1 | GCCGCC  | 2.40E-05   | 2.40E-05   | 4545  | 22 | 44430 | 69 | 0.00013889 | GCCCORE          |                                                                                                                                                                                                                                                                                                                                                                                                                                                                                                                                                                                                                                                                                                                                                                                                                                                                                                                                                                                                                                                                                                                                                                                                                                                                                                                                                                                                                                                                                                                                                                                                                                                                                                                                                                                                                                                                                                                                                                                                                                                                                                                                                                                                                                                                                                                                                                                                                                                                                                                                                                                                                                      |
| XY | XY1558 | 1558 | CC1 | GCCGCC  | 0.00012404 | 0.00012404 | 4546  | 21 | 44426 | 73 | 0.00013889 | GCCCORE          |                                                                                                                                                                                                                                                                                                                                                                                                                                                                                                                                                                                                                                                                                                                                                                                                                                                                                                                                                                                                                                                                                                                                                                                                                                                                                                                                                                                                                                                                                                                                                                                                                                                                                                                                                                                                                                                                                                                                                                                                                                                                                                                                                                                                                                                                                                                                                                                                                                                                                                                                                                                                                                      |
| XY | XY1643 | 1643 | CC2 | AAACAAA | 3.65E-07   | 2.40E-07   | 34627 | 91 | 14340 | 8  | 0.00013889 | ANAERO1CONSENSUS |                                                                                                                                                                                                                                                                                                                                                                                                                                                                                                                                                                                                                                                                                                                                                                                                                                                                                                                                                                                                                                                                                                                                                                                                                                                                                                                                                                                                                                                                                                                                                                                                                                                                                                                                                                                                                                                                                                                                                                                                                                                                                                                                                                                                                                                                                                                                                                                                                                                                                                                                                                                                                                      |
| XY | XY1644 | 1644 | CC1 | AAACAAA | 0.00012862 | 6.52E-05   | 34649 | 69 | 14340 | 8  | 0.00013889 | ANAERO1CONSENSUS |                                                                                                                                                                                                                                                                                                                                                                                                                                                                                                                                                                                                                                                                                                                                                                                                                                                                                                                                                                                                                                                                                                                                                                                                                                                                                                                                                                                                                                                                                                                                                                                                                                                                                                                                                                                                                                                                                                                                                                                                                                                                                                                                                                                                                                                                                                                                                                                                                                                                                                                                                                                                                                      |

**Table S9.** Overlap in gene membership among networks in leaf, xylem and root

| Leaf Network ID | Roor Network ID | Xylem Network ID | Present Both (A) | Xylem only (B) | Root Only (B) | Leaf only (C) | Absent Both (D) | Chi-Square value | P-value  | .01 Bonferroni |
|-----------------|-----------------|------------------|------------------|----------------|---------------|---------------|-----------------|------------------|----------|----------------|
| HSP738_CC1      |                 | HSP1096_CC1      | 19               | 5768           |               | 34            | 49972           | 37.0392159       | 1.16E-09 | 2.12E-05       |
| HSP734_CC1      |                 | HSP1096_CC1      | 18               | 5769           |               | 33            | 49973           | 34.1044998       | 5.22E-09 | 2.12E-05       |
| HSP1570_CC1     |                 | HSP1096_CC1      | 8                | 5779           |               | 12            | 49994           | 18.8914947       | 1.38E-05 | 2.12E-05       |
| HSP1568_CC1     |                 | HSP1096_CC1      | 8                | 5779           |               | 12            | 49994           | 18.8914947       | 1.38E-05 | 2.12E-05       |
| HSP1460_CC1     | HSP1087_CC1     |                  | 6                |                | 51            | 594           | 55142           | 47.9060534       | 4.47E-12 | 3.22E-05       |
| HSP1460_CC1     | HSP1088_CC1     |                  | 12               |                | 75            | 588           | 55118           | 132.476334       | 0        | 3.22E-05       |
| HSP1460_CC1     | HSP1089_CC1     |                  | 16               |                | 91            | 584           | 55102           | 194.082826       | 0        | 3.22E-05       |
| HSP1460_CC1     | HSP1090_CC1     |                  | 18               |                | 114           | 582           | 55079           | 196.233196       | 0        | 3.22E-05       |
| HSP1460_CC1     | HSP1091_CC1     |                  | 19               |                | 132           | 581           | 55061           | 188.465059       | 0        | 3.22E-05       |
| HSP1460_CC1     | HSP1092_CC1     |                  | 20               |                | 126           | 580           | 55067           | 219.258145       | 0        | 3.22E-05       |
| HSP1460_CC1     | HSP1093_CC1     |                  | 20               |                | 114           | 580           | 55079           | 242.198204       | 0        | 3.22E-05       |
| HSP1460_CC1     | HSP1094_CC2     |                  | 20               |                | 123           | 580           | 55070           | 224.630282       | 0        | 3.22E-05       |
| HSP1460_CC1     | HSP1095_CC2     |                  | 20               |                | 99            | 580           | 55094           | 277.414209       | 0        | 3.22E-05       |
| HSP1460_CC1     | HSP1096_CC2     |                  | 12               |                | 58            | 588           | 55135           | 170.083248       | 0        | 3.22E-05       |
| HSP1460_CC1     | HSP1264_CC2     |                  | 5                |                | 17            | 595           | 55176           | 96.9859719       | 0        | 3.22E-05       |
| HSP1460_CC1     | HSP1265_CC1     |                  | 5                |                | 23            | 595           | 55170           | 74.1607559       | 0        | 3.22E-05       |
| HSP1460_CC1     | HSP1795_CC2     |                  | 5                |                | 9             | 595           | 55184           | 157.938837       | 0        | 3.22E-05       |
| HSP1460_CC1     | HSP1798_CC1     |                  | 5                |                | 14            | 595           | 55179           | 113.819763       | 0        | 3.22E-05       |
| HSP1460_CC1     | HSP1799_CC1     |                  | 5                |                | 14            | 595           | 55179           | 113.819763       | 0        | 3.22E-05       |
| HSP1460_CC1     |                 | HSP1015_CC1      | 20               | 60             |               | 580           | 55133           | 431.048928       | 0        | 2.12E-05       |
| HSP1460_CC1     |                 | HSP1016_CC1      | 28               | 70             |               | 572           | 55123           | 697.675676       | 0        | 2.12E-05       |
| HSP1460_CC1     |                 | HSP1017_CC1      | 35               | 81             |               | 565           | 55112           | 925.087436       | 0        | 2.12E-05       |
| HSP1460_CC1     |                 | HSP1018_CC1      | 36               | 89             |               | 564           | 55104           | 905.187915       | 0        | 2.12E-05       |
| HSP1460_CC1     |                 | HSP1019_CC1      | 35               | 91             |               | 565           | 55102           | 846.401394       | 0        | 2.12E-05       |
| HSP1460_CC1     |                 | HSP1020_CC1      | 34               | 85             |               | 566           | 55108           | 847.497159       | 0        | 2.12E-05       |
| HSP1460_CC1     |                 | HSP1021_CC2      | 29               | 78             |               | 571           | 55115           | 682.658056       | 0        | 2.12E-05       |
| HSP1460_CC1     |                 | HSP1023_CC2      | 18               | 57             |               | 582           | 55136           | 370.999247       | 0        | 2.12E-05       |
| HSP1460_CC1     |                 | HSP1096_CC1      | 168              | 5619           |               | 432           | 49574           | 202.732617       | 0        | 2.12E-05       |
| HSP1460_CC1     |                 | HSP1386_CC2      | 34               | 179            |               | 566           | 55014           | 445.432111       | 0        | 2.12E-05       |
| HSP1460_CC1     |                 | HSP1629_CC1      | 7                | 23             |               | 593           | 55170           | 139.781129       | 0        | 2.12E-05       |
| HSP1459_CC1     | HSP1087_CC1     |                  | 7                |                | 50            | 696           | 55040           | 55.701571        | 8.44E-14 | 3.22E-05       |
| HSP1459_CC1     | HSP1088_CC1     |                  | 13               |                | 74            | 690           | 55016           | 131.117339       | 0        | 3.22E-05       |
| HSP1459_CC1     | HSP1089_CC1     |                  | 17               |                | 90            | 686           | 55000           | 184.377937       | 0        | 3.22E-05       |
| HSP1459_CC1     | HSP1090_CC1     |                  | 20               |                | 112           | 683           | 54978           | 205.225956       | 0        | 3.22E-05       |
| HSP1459_CC1     | HSP1091_CC1     |                  | 21               |                | 130           | 682           | 54960           | 194.660953       | 0        | 3.22E-05       |
| HSP1459_CC1     | HSP1092_CC1     |                  | 22               |                | 124           | 681           | 54966           | 224.343659       | 0        | 3.22E-05       |
| HSP1459_CC1     | HSP1093_CC1     |                  | 22               |                | 112           | 681           | 54978           | 248.060878       | 0        | 3.22E-05       |
| HSP1459_CC1     | HSP1094_CC2     |                  | 24               |                | 119           | 679           | 54971           | 277.679959       | 0        | 3.22E-05       |
| HSP1459_CC1     | HSP1095_CC2     |                  | 23               |                | 96            | 680           | 54994           | 312.904718       | 0        | 3.22E-05       |
| HSP1459_CC1     | HSP1096_CC2     |                  | 15               |                | 55            | 688           | 55035           | 229.152309       | 0        | 3.22E-05       |
| HSP1459_CC1     | HSP1264_CC2     |                  | 5                |                | 17            | 698           | 55073           | 81.5226797       | 0        | 3.22E-05       |
| HSP1459_CC1     | HSP1265_CC1     |                  | 5                |                | 23            | 698           | 55067           | 62.0259272       | 3.44E-15 | 3.22E-05       |
| HSP1459_CC1     | HSP1399_CC3     |                  | 5                |                | 9             | 698           | 55081           | 133.614776       | 0        | 3.22E-05       |
| HSP1459_CC1     | HSP1400_CC3     |                  | 5                |                | 12            | 698           | 55078           | 108.323677       | 0        | 3.22E-05       |

|             |             |     |      |     |       |            |          |          |
|-------------|-------------|-----|------|-----|-------|------------|----------|----------|
| HSP1459_CC1 | HSP1401_CC3 | 5   | 16   | 698 | 55074 | 85.8594901 | 0        | 3.22E-05 |
| HSP1459_CC1 | HSP1402_CC3 | 5   | 15   | 698 | 55075 | 90.631241  | 0        | 3.22E-05 |
| HSP1459_CC1 | HSP1403_CC2 | 5   | 15   | 698 | 55075 | 90.631241  | 0        | 3.22E-05 |
| HSP1459_CC1 | HSP1795_CC2 | 5   | 9    | 698 | 55081 | 133.614776 | 0        | 3.22E-05 |
| HSP1459_CC1 | HSP1798_CC1 | 5   | 14   | 698 | 55076 | 95.906607  | 0        | 3.22E-05 |
| HSP1459_CC1 | HSP1799_CC1 | 5   | 14   | 698 | 55076 | 95.906607  | 0        | 3.22E-05 |
| HSP1459_CC1 | HSP1015_CC1 | 21  | 59   | 682 | 55031 | 402.139273 | 0        | 2.12E-05 |
| HSP1459_CC1 | HSP1016_CC1 | 29  | 69   | 674 | 55021 | 633.388134 | 0        | 2.12E-05 |
| HSP1459_CC1 | HSP1017_CC1 | 36  | 80   | 667 | 55010 | 828.287735 | 0        | 2.12E-05 |
| HSP1459_CC1 | HSP1018_CC1 | 37  | 88   | 666 | 55002 | 808.750721 | 0        | 2.12E-05 |
| HSP1459_CC1 | HSP1019_CC1 | 36  | 90   | 667 | 55000 | 757.132938 | 0        | 2.12E-05 |
| HSP1459_CC1 | HSP1020_CC1 | 35  | 84   | 668 | 55006 | 759.654956 | 0        | 2.12E-05 |
| HSP1459_CC1 | HSP1021_CC2 | 30  | 77   | 673 | 55013 | 617.852189 | 0        | 2.12E-05 |
| HSP1459_CC1 | HSP1023_CC2 | 19  | 56   | 684 | 55034 | 349.823288 | 0        | 2.12E-05 |
| HSP1459_CC1 | HSP1096_CC1 | 198 | 5589 | 505 | 49501 | 242.455295 | 0        | 2.12E-05 |
| HSP1459_CC1 | HSP1386_CC2 | 41  | 172  | 662 | 54918 | 556.130934 | 0        | 2.12E-05 |
| HSP1459_CC1 | HSP1629_CC1 | 7   | 23   | 696 | 55067 | 117.549675 | 0        | 2.12E-05 |
| HSP1458_CC1 | HSP1087_CC1 | 8   | 49   | 801 | 54935 | 63.2420088 | 1.78E-15 | 3.22E-05 |
| HSP1458_CC1 | HSP1088_CC1 | 14  | 73   | 795 | 54911 | 130.728262 | 0        | 3.22E-05 |
| HSP1458_CC1 | HSP1089_CC1 | 19  | 88   | 790 | 54896 | 199.498917 | 0        | 3.22E-05 |
| HSP1458_CC1 | HSP1090_CC1 | 23  | 109  | 786 | 54875 | 236.274913 | 0        | 3.22E-05 |
| HSP1458_CC1 | HSP1091_CC1 | 24  | 127  | 785 | 54857 | 221.057723 | 0        | 3.22E-05 |
| HSP1458_CC1 | HSP1092_CC1 | 24  | 122  | 785 | 54862 | 230.130003 | 0        | 3.22E-05 |
| HSP1458_CC1 | HSP1093_CC1 | 24  | 110  | 785 | 54874 | 254.687035 | 0        | 3.22E-05 |
| HSP1458_CC1 | HSP1094_CC2 | 28  | 115  | 781 | 54869 | 329.792473 | 0        | 3.22E-05 |
| HSP1458_CC1 | HSP1095_CC2 | 26  | 93   | 783 | 54891 | 347.260491 | 0        | 3.22E-05 |
| HSP1458_CC1 | HSP1096_CC2 | 17  | 53   | 792 | 54931 | 255.768431 | 0        | 3.22E-05 |
| HSP1458_CC1 | HSP1264_CC2 | 6   | 16   | 803 | 54968 | 102.700525 | 0        | 3.22E-05 |
| HSP1458_CC1 | HSP1265_CC1 | 6   | 22   | 803 | 54962 | 78.2491015 | 0        | 3.22E-05 |
| HSP1458_CC1 | HSP1266_CC1 | 5   | 18   | 804 | 54966 | 66.2839277 | 4.44E-16 | 3.22E-05 |
| HSP1458_CC1 | HSP1267_CC1 | 5   | 10   | 804 | 54974 | 106.735767 | 0        | 3.22E-05 |
| HSP1458_CC1 | HSP1399_CC3 | 5   | 9    | 804 | 54975 | 115.052192 | 0        | 3.22E-05 |
| HSP1458_CC1 | HSP1400_CC3 | 5   | 12   | 804 | 54972 | 93.0432595 | 0        | 3.22E-05 |
| HSP1458_CC1 | HSP1401_CC3 | 5   | 16   | 804 | 54968 | 73.4991576 | 0        | 3.22E-05 |
| HSP1458_CC1 | HSP1402_CC3 | 5   | 15   | 804 | 54969 | 77.6500972 | 0        | 3.22E-05 |
| HSP1458_CC1 | HSP1403_CC2 | 5   | 15   | 804 | 54969 | 77.6500972 | 0        | 3.22E-05 |
| HSP1458_CC1 | HSP1795_CC2 | 5   | 9    | 804 | 54975 | 115.052192 | 0        | 3.22E-05 |
| HSP1458_CC1 | HSP1798_CC1 | 5   | 14   | 804 | 54970 | 82.2395091 | 0        | 3.22E-05 |
| HSP1458_CC1 | HSP1799_CC1 | 5   | 14   | 804 | 54970 | 82.2395091 | 0        | 3.22E-05 |
| HSP1458_CC1 | HSP1015_CC1 | 22  | 58   | 787 | 54926 | 380.454826 | 0        | 2.12E-05 |
| HSP1458_CC1 | HSP1016_CC1 | 30  | 68   | 779 | 54916 | 584.259769 | 0        | 2.12E-05 |
| HSP1458_CC1 | HSP1017_CC1 | 37  | 79   | 772 | 54905 | 754.07163  | 0        | 2.12E-05 |
| HSP1458_CC1 | HSP1018_CC1 | 38  | 87   | 771 | 54897 | 734.777315 | 0        | 2.12E-05 |
| HSP1458_CC1 | HSP1019_CC1 | 36  | 90   | 773 | 54894 | 650.057921 | 0        | 2.12E-05 |
| HSP1458_CC1 | HSP1020_CC1 | 35  | 84   | 774 | 54900 | 652.496064 | 0        | 2.12E-05 |
| HSP1458_CC1 | HSP1021_CC2 | 30  | 77   | 779 | 54907 | 530.326277 | 0        | 2.12E-05 |
| HSP1458_CC1 | HSP1023_CC2 | 19  | 56   | 790 | 54928 | 299.784943 | 0        | 2.12E-05 |
| HSP1458_CC1 | HSP1096_CC1 | 241 | 5546 | 568 | 49438 | 332.940491 | 0        | 2.12E-05 |

|             |             |             |     |      |     |       |            |          |          |
|-------------|-------------|-------------|-----|------|-----|-------|------------|----------|----------|
| HSP1458_CC1 |             | HSP1386_CC2 | 45  | 168  | 764 | 54816 | 579.325218 | 0        | 2.12E-05 |
| HSP1458_CC1 |             | HSP1629_CC1 | 7   | 23   | 802 | 54961 | 100.590336 | 0        | 2.12E-05 |
| HSP1457_CC1 | HSP1087_CC1 |             | 10  | 47   | 872 | 54864 | 93.450186  | 0        | 3.22E-05 |
| HSP1457_CC1 | HSP1088_CC1 |             | 17  | 70   | 865 | 54841 | 180.63898  | 0        | 3.22E-05 |
| HSP1457_CC1 | HSP1089_CC1 |             | 22  | 85   | 860 | 54826 | 248.220125 | 0        | 3.22E-05 |
| HSP1457_CC1 | HSP1090_CC1 |             | 26  | 106  | 856 | 54805 | 279.103194 | 0        | 3.22E-05 |
| HSP1457_CC1 | HSP1091_CC1 |             | 27  | 124  | 855 | 54787 | 258.55803  | 0        | 3.22E-05 |
| HSP1457_CC1 | HSP1092_CC1 |             | 27  | 119  | 855 | 54792 | 269.108876 | 0        | 3.22E-05 |
| HSP1457_CC1 | HSP1093_CC1 |             | 27  | 107  | 855 | 54804 | 297.666561 | 0        | 3.22E-05 |
| HSP1457_CC1 | HSP1094_CC2 |             | 31  | 112  | 851 | 54799 | 372.190433 | 0        | 3.22E-05 |
| HSP1457_CC1 | HSP1095_CC2 |             | 29  | 90   | 853 | 54821 | 398.063754 | 0        | 3.22E-05 |
| HSP1457_CC1 | HSP1096_CC2 |             | 18  | 52   | 864 | 54859 | 262.36947  | 0        | 3.22E-05 |
| HSP1457_CC1 | HSP1264_CC2 |             | 6   | 16   | 876 | 54895 | 93.3721484 | 0        | 3.22E-05 |
| HSP1457_CC1 | HSP1265_CC1 |             | 6   | 22   | 876 | 54889 | 70.9298639 | 0        | 3.22E-05 |
| HSP1457_CC1 | HSP1266_CC1 |             | 5   | 18   | 877 | 54893 | 60.0960105 | 8.99E-15 | 3.22E-05 |
| HSP1457_CC1 | HSP1267_CC1 |             | 5   | 10   | 877 | 54901 | 97.2288385 | 0        | 3.22E-05 |
| HSP1457_CC1 | HSP1399_CC3 |             | 5   | 9    | 877 | 54902 | 104.864548 | 0        | 3.22E-05 |
| HSP1457_CC1 | HSP1400_CC3 |             | 5   | 12   | 877 | 54899 | 84.6579845 | 0        | 3.22E-05 |
| HSP1457_CC1 | HSP1401_CC3 |             | 5   | 16   | 877 | 54895 | 66.7177883 | 3.33E-16 | 3.22E-05 |
| HSP1457_CC1 | HSP1402_CC3 |             | 5   | 15   | 877 | 54896 | 70.5276954 | 0        | 3.22E-05 |
| HSP1457_CC1 | HSP1403_CC2 |             | 5   | 15   | 877 | 54896 | 70.5276954 | 0        | 3.22E-05 |
| HSP1457_CC1 | HSP1795_CC2 |             | 5   | 9    | 877 | 54902 | 104.864548 | 0        | 3.22E-05 |
| HSP1457_CC1 | HSP1798_CC1 |             | 5   | 14   | 877 | 54897 | 74.7403188 | 0        | 3.22E-05 |
| HSP1457_CC1 | HSP1799_CC1 |             | 5   | 14   | 877 | 54897 | 74.7403188 | 0        | 3.22E-05 |
| HSP1457_CC1 |             | HSP1015_CC1 | 25  | 55   | 857 | 54856 | 453.267986 | 0        | 2.12E-05 |
| HSP1457_CC1 |             | HSP1016_CC1 | 33  | 65   | 849 | 54846 | 649.877617 | 0        | 2.12E-05 |
| HSP1457_CC1 |             | HSP1017_CC1 | 41  | 75   | 841 | 54836 | 851.727641 | 0        | 2.12E-05 |
| HSP1457_CC1 |             | HSP1018_CC1 | 42  | 83   | 840 | 54828 | 825.534777 | 0        | 2.12E-05 |
| HSP1457_CC1 |             | HSP1019_CC1 | 40  | 86   | 842 | 54825 | 738.577398 | 0        | 2.12E-05 |
| HSP1457_CC1 |             | HSP1020_CC1 | 38  | 81   | 844 | 54830 | 706.119742 | 0        | 2.12E-05 |
| HSP1457_CC1 |             | HSP1021_CC2 | 33  | 74   | 849 | 54837 | 589.937299 | 0        | 2.12E-05 |
| HSP1457_CC1 |             | HSP1023_CC2 | 22  | 53   | 860 | 54858 | 371.775575 | 0        | 2.12E-05 |
| HSP1457_CC1 |             | HSP1096_CC1 | 264 | 5523 | 618 | 49388 | 368.805447 | 0        | 2.12E-05 |
| HSP1457_CC1 |             | HSP1386_CC2 | 49  | 164  | 833 | 54747 | 630.764668 | 0        | 2.12E-05 |
| HSP1457_CC1 |             | HSP1629_CC1 | 7   | 23   | 875 | 54888 | 91.2860212 | 0        | 2.12E-05 |
| HSP1456_CC1 | HSP1087_CC1 |             | 10  | 47   | 914 | 54822 | 88.430752  | 0        | 3.22E-05 |
| HSP1456_CC1 | HSP1088_CC1 |             | 17  | 70   | 907 | 54799 | 171.116536 | 0        | 3.22E-05 |
| HSP1456_CC1 | HSP1089_CC1 |             | 22  | 85   | 902 | 54784 | 235.241563 | 0        | 3.22E-05 |
| HSP1456_CC1 | HSP1090_CC1 |             | 26  | 106  | 898 | 54763 | 264.409434 | 0        | 3.22E-05 |
| HSP1456_CC1 | HSP1091_CC1 |             | 27  | 124  | 897 | 54745 | 244.718186 | 0        | 3.22E-05 |
| HSP1456_CC1 | HSP1092_CC1 |             | 27  | 119  | 897 | 54750 | 254.789862 | 0        | 3.22E-05 |
| HSP1456_CC1 | HSP1093_CC1 |             | 27  | 107  | 897 | 54762 | 282.052832 | 0        | 3.22E-05 |
| HSP1456_CC1 | HSP1094_CC2 |             | 31  | 112  | 893 | 54757 | 352.886125 | 0        | 3.22E-05 |
| HSP1456_CC1 | HSP1095_CC2 |             | 29  | 90   | 895 | 54779 | 377.752728 | 0        | 3.22E-05 |
| HSP1456_CC1 | HSP1096_CC2 |             | 18  | 52   | 906 | 54817 | 249.074139 | 0        | 3.22E-05 |
| HSP1456_CC1 | HSP1264_CC2 |             | 6   | 16   | 918 | 54853 | 88.6742526 | 0        | 3.22E-05 |
| HSP1456_CC1 | HSP1265_CC1 |             | 6   | 22   | 918 | 54847 | 67.2445992 | 2.22E-16 | 3.22E-05 |
| HSP1456_CC1 | HSP1266_CC1 |             | 5   | 18   | 919 | 54851 | 56.9803182 | 4.40E-14 | 3.22E-05 |

|             |             |     |      |     |       |            |          |          |
|-------------|-------------|-----|------|-----|-------|------------|----------|----------|
| HSP1456_CC1 | HSP1267_CC1 | 5   | 10   | 919 | 54859 | 92.4405112 | 0        | 3.22E-05 |
| HSP1456_CC1 | HSP1399_CC3 | 5   | 9    | 919 | 54860 | 99.733234  | 0        | 3.22E-05 |
| HSP1456_CC1 | HSP1400_CC3 | 5   | 12   | 919 | 54857 | 80.4348519 | 0        | 3.22E-05 |
| HSP1456_CC1 | HSP1401_CC3 | 5   | 16   | 919 | 54853 | 63.3029664 | 1.78E-15 | 3.22E-05 |
| HSP1456_CC1 | HSP1402_CC3 | 5   | 15   | 919 | 54854 | 66.9409907 | 3.33E-16 | 3.22E-05 |
| HSP1456_CC1 | HSP1403_CC2 | 5   | 15   | 919 | 54854 | 66.9409907 | 3.33E-16 | 3.22E-05 |
| HSP1456_CC1 | HSP1654_CC2 | 5   | 19   | 919 | 54850 | 54.2162445 | 1.80E-13 | 3.22E-05 |
| HSP1456_CC1 | HSP1655_CC2 | 5   | 19   | 919 | 54850 | 54.2162445 | 1.80E-13 | 3.22E-05 |
| HSP1456_CC1 | HSP1795_CC2 | 5   | 9    | 919 | 54860 | 99.733234  | 0        | 3.22E-05 |
| HSP1456_CC1 | HSP1798_CC1 | 5   | 14   | 919 | 54855 | 70.9637204 | 0        | 3.22E-05 |
| HSP1456_CC1 | HSP1799_CC1 | 5   | 14   | 919 | 54855 | 70.9637204 | 0        | 3.22E-05 |
| HSP1456_CC1 | HSP1015_CC1 | 26  | 54   | 898 | 54815 | 467.963014 | 0        | 2.12E-05 |
| HSP1456_CC1 | HSP1016_CC1 | 34  | 64   | 890 | 54805 | 657.916944 | 0        | 2.12E-05 |
| HSP1456_CC1 | HSP1017_CC1 | 42  | 74   | 882 | 54795 | 851.996618 | 0        | 2.12E-05 |
| HSP1456_CC1 | HSP1018_CC1 | 43  | 82   | 881 | 54787 | 824.716635 | 0        | 2.12E-05 |
| HSP1456_CC1 | HSP1019_CC1 | 41  | 85   | 883 | 54784 | 739.550082 | 0        | 2.12E-05 |
| HSP1456_CC1 | HSP1020_CC1 | 39  | 80   | 885 | 54789 | 708.973093 | 0        | 2.12E-05 |
| HSP1456_CC1 | HSP1021_CC2 | 33  | 74   | 891 | 54795 | 560.657026 | 0        | 2.12E-05 |
| HSP1456_CC1 | HSP1023_CC2 | 22  | 53   | 902 | 54816 | 353.224272 | 0        | 2.12E-05 |
| HSP1456_CC1 | HSP1096_CC1 | 278 | 5509 | 646 | 49360 | 392.800185 | 0        | 2.12E-05 |
| HSP1456_CC1 | HSP1386_CC2 | 53  | 160  | 871 | 54709 | 708.221333 | 0        | 2.12E-05 |
| HSP1456_CC1 | HSP1629_CC1 | 7   | 23   | 917 | 54846 | 86.6008359 | 0        | 2.12E-05 |
| HSP1455_CC1 | HSP1087_CC1 | 10  | 47   | 935 | 54801 | 86.0893726 | 0        | 3.22E-05 |
| HSP1455_CC1 | HSP1088_CC1 | 17  | 70   | 928 | 54778 | 166.674216 | 0        | 3.22E-05 |
| HSP1455_CC1 | HSP1089_CC1 | 22  | 85   | 923 | 54763 | 229.186685 | 0        | 3.22E-05 |
| HSP1455_CC1 | HSP1090_CC1 | 26  | 106  | 919 | 54742 | 257.554595 | 0        | 3.22E-05 |
| HSP1455_CC1 | HSP1091_CC1 | 27  | 124  | 918 | 54724 | 238.262285 | 0        | 3.22E-05 |
| HSP1455_CC1 | HSP1092_CC1 | 27  | 119  | 918 | 54729 | 248.11022  | 0        | 3.22E-05 |
| HSP1455_CC1 | HSP1093_CC1 | 27  | 107  | 918 | 54741 | 274.768683 | 0        | 3.22E-05 |
| HSP1455_CC1 | HSP1094_CC2 | 30  | 113  | 915 | 54735 | 320.234714 | 0        | 3.22E-05 |
| HSP1455_CC1 | HSP1095_CC2 | 29  | 90   | 916 | 54758 | 368.276048 | 0        | 3.22E-05 |
| HSP1455_CC1 | HSP1096_CC2 | 18  | 52   | 927 | 54796 | 242.870671 | 0        | 3.22E-05 |
| HSP1455_CC1 | HSP1264_CC2 | 6   | 16   | 939 | 54832 | 86.4822082 | 0        | 3.22E-05 |
| HSP1455_CC1 | HSP1265_CC1 | 6   | 22   | 939 | 54826 | 65.5252651 | 5.55E-16 | 3.22E-05 |
| HSP1455_CC1 | HSP1266_CC1 | 5   | 18   | 940 | 54830 | 55.5267001 | 9.21E-14 | 3.22E-05 |
| HSP1455_CC1 | HSP1267_CC1 | 5   | 10   | 940 | 54838 | 90.2061343 | 0        | 3.22E-05 |
| HSP1455_CC1 | HSP1399_CC3 | 5   | 9    | 940 | 54839 | 97.3387732 | 0        | 3.22E-05 |
| HSP1455_CC1 | HSP1400_CC3 | 5   | 12   | 940 | 54836 | 78.4642802 | 0        | 3.22E-05 |
| HSP1455_CC1 | HSP1401_CC3 | 5   | 16   | 940 | 54832 | 61.7097044 | 4.00E-15 | 3.22E-05 |
| HSP1455_CC1 | HSP1402_CC3 | 5   | 15   | 940 | 54833 | 65.267492  | 6.66E-16 | 3.22E-05 |
| HSP1455_CC1 | HSP1403_CC2 | 5   | 15   | 940 | 54833 | 65.267492  | 6.66E-16 | 3.22E-05 |
| HSP1455_CC1 | HSP1654_CC2 | 5   | 19   | 940 | 54829 | 52.8237693 | 3.65E-13 | 3.22E-05 |
| HSP1455_CC1 | HSP1655_CC2 | 5   | 19   | 940 | 54829 | 52.8237693 | 3.65E-13 | 3.22E-05 |
| HSP1455_CC1 | HSP1795_CC2 | 5   | 9    | 940 | 54839 | 97.3387732 | 0        | 3.22E-05 |
| HSP1455_CC1 | HSP1798_CC1 | 5   | 14   | 940 | 54834 | 69.2015799 | 1.11E-16 | 3.22E-05 |
| HSP1455_CC1 | HSP1799_CC1 | 5   | 14   | 940 | 54834 | 69.2015799 | 1.11E-16 | 3.22E-05 |
| HSP1455_CC1 | HSP1015_CC1 | 26  | 54   | 919 | 54794 | 456.622539 | 0        | 2.12E-05 |
| HSP1455_CC1 | HSP1016_CC1 | 34  | 64   | 911 | 54784 | 642.07736  | 0        | 2.12E-05 |

|             |             |             |     |      |     |       |            |            |          |          |
|-------------|-------------|-------------|-----|------|-----|-------|------------|------------|----------|----------|
| HSP1455_CC1 |             | HSP1017_CC1 | 42  | 74   | 903 | 54774 | 831.567559 | 0          | 2.12E-05 |          |
| HSP1455_CC1 |             | HSP1018_CC1 | 43  | 82   | 902 | 54766 | 804.84481  | 0          | 2.12E-05 |          |
| HSP1455_CC1 |             | HSP1019_CC1 | 41  | 85   | 904 | 54763 | 721.630315 | 0          | 2.12E-05 |          |
| HSP1455_CC1 |             | HSP1020_CC1 | 39  | 80   | 906 | 54768 | 691.806891 | 0          | 2.12E-05 |          |
| HSP1455_CC1 |             | HSP1021_CC2 | 33  | 74   | 912 | 54774 | 546.99425  | 0          | 2.12E-05 |          |
| HSP1455_CC1 |             | HSP1023_CC2 | 22  | 53   | 923 | 54795 | 344.567986 | 0          | 2.12E-05 |          |
| HSP1455_CC1 |             | HSP1096_CC1 | 285 | 5502 | 660 | 49346 | 404.828252 | 0          | 2.12E-05 |          |
| HSP1455_CC1 |             | HSP1386_CC2 | 53  | 160  | 892 | 54688 | 690.504805 | 0          | 2.12E-05 |          |
| HSP1455_CC1 |             | HSP1629_CC1 | 8   | 22   | 937 | 54826 | 112.424204 | 0          | 2.12E-05 |          |
| HSP1454_CC2 |             | HSP249_CC1  | 5   | 801  | 20  | 54967 | 60.4837144 | 7.44E-15   | 2.12E-05 |          |
| HSP1454_CC2 |             | HSP250_CC1  | 5   | 873  | 20  | 54895 | 54.8259383 | 1.32E-13   | 2.12E-05 |          |
| HSP1454_CC2 |             | HSP251_CC1  | 5   | 915  | 20  | 54853 | 51.9360928 | 5.73E-13   | 2.12E-05 |          |
| HSP1454_CC2 |             | HSP252_CC1  | 5   | 923  | 20  | 54845 | 51.4154336 | 7.48E-13   | 2.12E-05 |          |
| HSP1454_CC2 |             | HSP253_CC1  | 5   | 918  | 20  | 54850 | 51.739783  | 6.34E-13   | 2.12E-05 |          |
| HSP1454_CC2 |             | HSP254_CC1  | 5   | 908  | 20  | 54860 | 52.3991891 | 4.53E-13   | 2.12E-05 |          |
| HSP1454_CC2 |             | HSP255_CC1  | 5   | 886  | 20  | 54882 | 53.9022217 | 2.11E-13   | 2.12E-05 |          |
| HSP1454_CC2 |             | HSP256_CC1  | 5   | 862  | 20  | 54906 | 55.6292724 | 8.75E-14   | 2.12E-05 |          |
| HSP1454_CC1 | HSP1087_CC1 |             | 10  |      | 47  | 924   | 54812      | 87.3025923 | 0        | 3.22E-05 |
| HSP1454_CC1 | HSP1088_CC1 |             | 17  |      | 70  | 917   | 54789      | 168.976106 | 0        | 3.22E-05 |
| HSP1454_CC1 | HSP1089_CC1 |             | 22  |      | 85  | 912   | 54774      | 232.324181 | 0        | 3.22E-05 |
| HSP1454_CC1 | HSP1090_CC1 |             | 26  |      | 106 | 908   | 54753      | 261.106592 | 0        | 3.22E-05 |
| HSP1454_CC1 | HSP1091_CC1 |             | 27  |      | 124 | 907   | 54735      | 241.607514 | 0        | 3.22E-05 |
| HSP1454_CC1 | HSP1092_CC1 |             | 27  |      | 119 | 907   | 54740      | 251.571403 | 0        | 3.22E-05 |
| HSP1454_CC1 | HSP1093_CC1 |             | 27  |      | 107 | 907   | 54752      | 278.543148 | 0        | 3.22E-05 |
| HSP1454_CC1 | HSP1094_CC2 |             | 30  |      | 113 | 904   | 54746      | 324.60393  | 0        | 3.22E-05 |
| HSP1454_CC1 | HSP1095_CC2 |             | 29  |      | 90  | 905   | 54769      | 373.186724 | 0        | 3.22E-05 |
| HSP1454_CC1 | HSP1096_CC2 |             | 18  |      | 52  | 916   | 54807      | 246.08523  | 0        | 3.22E-05 |
| HSP1454_CC1 | HSP1264_CC2 |             | 6   |      | 16  | 928   | 54843      | 87.6181026 | 0        | 3.22E-05 |
| HSP1454_CC1 | HSP1265_CC1 |             | 6   |      | 22  | 928   | 54837      | 66.4161878 | 3.33E-16 | 3.22E-05 |
| HSP1454_CC1 | HSP1266_CC1 |             | 5   |      | 18  | 929   | 54841      | 56.2799356 | 6.28E-14 | 3.22E-05 |
| HSP1454_CC1 | HSP1267_CC1 |             | 5   |      | 10  | 929   | 54849      | 91.3639765 | 0        | 3.22E-05 |
| HSP1454_CC1 | HSP1399_CC3 |             | 5   |      | 9   | 929   | 54850      | 98.579573  | 0        | 3.22E-05 |
| HSP1454_CC1 | HSP1400_CC3 |             | 5   |      | 12  | 929   | 54847      | 79.4854142 | 0        | 3.22E-05 |
| HSP1454_CC1 | HSP1401_CC3 |             | 5   |      | 16  | 929   | 54843      | 62.5353077 | 2.66E-15 | 3.22E-05 |
| HSP1454_CC1 | HSP1402_CC3 |             | 5   |      | 15  | 929   | 54844      | 66.1346762 | 4.44E-16 | 3.22E-05 |
| HSP1454_CC1 | HSP1403_CC2 |             | 5   |      | 15  | 929   | 54844      | 66.1346762 | 4.44E-16 | 3.22E-05 |
| HSP1454_CC1 | HSP1654_CC2 |             | 5   |      | 19  | 929   | 54840      | 53.5453183 | 2.53E-13 | 3.22E-05 |
| HSP1454_CC1 | HSP1655_CC2 |             | 5   |      | 19  | 929   | 54840      | 53.5453183 | 2.53E-13 | 3.22E-05 |
| HSP1454_CC1 | HSP1795_CC2 |             | 5   |      | 9   | 929   | 54850      | 98.579573  | 0        | 3.22E-05 |
| HSP1454_CC1 | HSP1798_CC1 |             | 5   |      | 14  | 929   | 54845      | 70.1147004 | 1.11E-16 | 3.22E-05 |
| HSP1454_CC1 | HSP1799_CC1 |             | 5   |      | 14  | 929   | 54845      | 70.1147004 | 1.11E-16 | 3.22E-05 |
| HSP1454_CC1 |             | HSP1015_CC1 | 25  | 55   | 909 | 54804 | 425.750701 | 0          | 2.12E-05 |          |
| HSP1454_CC1 |             | HSP1016_CC1 | 32  | 66   | 902 | 54793 | 572.386639 | 0          | 2.12E-05 |          |
| HSP1454_CC1 |             | HSP1017_CC1 | 40  | 76   | 894 | 54783 | 760.159879 | 0          | 2.12E-05 |          |
| HSP1454_CC1 |             | HSP1018_CC1 | 41  | 84   | 893 | 54775 | 737.384731 | 0          | 2.12E-05 |          |
| HSP1454_CC1 |             | HSP1019_CC1 | 39  | 87   | 895 | 54772 | 657.672804 | 0          | 2.12E-05 |          |
| HSP1454_CC1 |             | HSP1020_CC1 | 37  | 82   | 897 | 54777 | 627.013328 | 0          | 2.12E-05 |          |
| HSP1454_CC1 |             | HSP1021_CC2 | 31  | 76   | 903 | 54783 | 485.334504 | 0          | 2.12E-05 |          |

|             |             |             |     |      |     |       |            |          |          |
|-------------|-------------|-------------|-----|------|-----|-------|------------|----------|----------|
| HSP1454_CC1 |             | HSP1023_CC2 | 21  | 54   | 913 | 54805 | 316.21203  | 0        | 2.12E-05 |
| HSP1454_CC1 |             | HSP1096_CC1 | 286 | 5501 | 648 | 49358 | 418.945486 | 0        | 2.12E-05 |
| HSP1454_CC1 |             | HSP1386_CC2 | 52  | 161  | 882 | 54698 | 671.663888 | 0        | 2.12E-05 |
| HSP1454_CC1 |             | HSP1629_CC1 | 8   | 22   | 926 | 54837 | 113.905089 | 0        | 2.12E-05 |
| HSP1453_CC1 | HSP1087_CC1 |             | 9   | 48   | 891 | 54845 | 72.2518027 | 0        | 3.22E-05 |
| HSP1453_CC1 | HSP1088_CC1 |             | 16  | 71   | 884 | 54822 | 154.547414 | 0        | 3.22E-05 |
| HSP1453_CC1 | HSP1089_CC1 |             | 21  | 86   | 879 | 54807 | 219.175769 | 0        | 3.22E-05 |
| HSP1453_CC1 | HSP1090_CC1 |             | 25  | 107  | 875 | 54786 | 250.27281  | 0        | 3.22E-05 |
| HSP1453_CC1 | HSP1091_CC1 |             | 26  | 125  | 874 | 54768 | 232.330259 | 0        | 3.22E-05 |
| HSP1453_CC1 | HSP1092_CC1 |             | 26  | 120  | 874 | 54773 | 241.912753 | 0        | 3.22E-05 |
| HSP1453_CC1 | HSP1093_CC1 |             | 26  | 108  | 874 | 54785 | 267.852114 | 0        | 3.22E-05 |
| HSP1453_CC1 | HSP1094_CC2 |             | 29  | 114  | 871 | 54779 | 314.76154  | 0        | 3.22E-05 |
| HSP1453_CC1 | HSP1095_CC2 |             | 28  | 91   | 872 | 54802 | 360.918315 | 0        | 3.22E-05 |
| HSP1453_CC1 | HSP1096_CC2 |             | 17  | 53   | 883 | 54840 | 227.010634 | 0        | 3.22E-05 |
| HSP1453_CC1 | HSP1264_CC2 |             | 6   | 16   | 894 | 54877 | 91.3049691 | 0        | 3.22E-05 |
| HSP1453_CC1 | HSP1265_CC1 |             | 6   | 22   | 894 | 54871 | 69.3081912 | 1.11E-16 | 3.22E-05 |
| HSP1453_CC1 | HSP1266_CC1 |             | 5   | 18   | 895 | 54875 | 58.7249786 | 1.81E-14 | 3.22E-05 |
| HSP1453_CC1 | HSP1267_CC1 |             | 5   | 10   | 895 | 54883 | 95.1219142 | 0        | 3.22E-05 |
| HSP1453_CC1 | HSP1654_CC2 |             | 5   | 19   | 895 | 54874 | 55.887555  | 7.67E-14 | 3.22E-05 |
| HSP1453_CC1 | HSP1655_CC2 |             | 5   | 19   | 895 | 54874 | 55.887555  | 7.67E-14 | 3.22E-05 |
| HSP1453_CC1 | HSP1795_CC2 |             | 5   | 9    | 895 | 54884 | 102.606718 | 0        | 3.22E-05 |
| HSP1453_CC1 | HSP1798_CC1 |             | 5   | 14   | 895 | 54879 | 73.0785223 | 0        | 3.22E-05 |
| HSP1453_CC1 | HSP1799_CC1 |             | 5   | 14   | 895 | 54879 | 73.0785223 | 0        | 3.22E-05 |
| HSP1453_CC1 |             | HSP1015_CC1 | 23  | 57   | 877 | 54836 | 371.734953 | 0        | 2.12E-05 |
| HSP1453_CC1 |             | HSP1016_CC1 | 30  | 68   | 870 | 54825 | 520.187307 | 0        | 2.12E-05 |
| HSP1453_CC1 |             | HSP1017_CC1 | 38  | 78   | 862 | 54815 | 710.481649 | 0        | 2.12E-05 |
| HSP1453_CC1 |             | HSP1018_CC1 | 39  | 86   | 861 | 54807 | 691.007601 | 0        | 2.12E-05 |
| HSP1453_CC1 |             | HSP1019_CC1 | 37  | 89   | 863 | 54804 | 612.830184 | 0        | 2.12E-05 |
| HSP1453_CC1 |             | HSP1020_CC1 | 35  | 84   | 865 | 54809 | 580.659985 | 0        | 2.12E-05 |
| HSP1453_CC1 |             | HSP1021_CC2 | 29  | 78   | 871 | 54815 | 438.881027 | 0        | 2.12E-05 |
| HSP1453_CC1 |             | HSP1023_CC2 | 19  | 56   | 881 | 54837 | 266.246017 | 0        | 2.12E-05 |
| HSP1453_CC1 |             | HSP1096_CC1 | 281 | 5506 | 619 | 49387 | 427.759102 | 0        | 2.12E-05 |
| HSP1453_CC1 |             | HSP1386_CC2 | 49  | 164  | 851 | 54729 | 616.491126 | 0        | 2.12E-05 |
| HSP1453_CC1 |             | HSP1629_CC1 | 7   | 23   | 893 | 54870 | 89.2243803 | 0        | 2.12E-05 |
| HSP1452_CC1 | HSP1087_CC1 |             | 8   | 49   | 844 | 54892 | 59.3634036 | 1.31E-14 | 3.22E-05 |
| HSP1452_CC1 | HSP1088_CC1 |             | 15  | 72   | 837 | 54869 | 143.090459 | 0        | 3.22E-05 |
| HSP1452_CC1 | HSP1089_CC1 |             | 20  | 87   | 832 | 54854 | 210.040885 | 0        | 3.22E-05 |
| HSP1452_CC1 | HSP1090_CC1 |             | 24  | 108  | 828 | 54833 | 244.062966 | 0        | 3.22E-05 |
| HSP1452_CC1 | HSP1091_CC1 |             | 25  | 126  | 827 | 54815 | 227.431165 | 0        | 3.22E-05 |
| HSP1452_CC1 | HSP1092_CC1 |             | 25  | 121  | 827 | 54820 | 236.784069 | 0        | 3.22E-05 |
| HSP1452_CC1 | HSP1093_CC1 |             | 25  | 109  | 827 | 54832 | 262.101205 | 0        | 3.22E-05 |
| HSP1452_CC1 | HSP1094_CC2 |             | 28  | 115  | 824 | 54826 | 310.734362 | 0        | 3.22E-05 |
| HSP1452_CC1 | HSP1095_CC2 |             | 27  | 92   | 825 | 54849 | 355.149363 | 0        | 3.22E-05 |
| HSP1452_CC1 | HSP1096_CC2 |             | 16  | 54   | 836 | 54887 | 212.056252 | 0        | 3.22E-05 |
| HSP1452_CC1 | HSP1264_CC2 |             | 6   | 16   | 846 | 54925 | 97.0119185 | 0        | 3.22E-05 |
| HSP1452_CC1 | HSP1265_CC1 |             | 6   | 22   | 846 | 54919 | 73.7854709 | 0        | 3.22E-05 |
| HSP1452_CC1 | HSP1266_CC1 |             | 5   | 18   | 847 | 54923 | 62.5102469 | 2.66E-15 | 3.22E-05 |
| HSP1452_CC1 | HSP1267_CC1 |             | 5   | 10   | 847 | 54931 | 100.938424 | 0        | 3.22E-05 |

|             |             |     |      |     |       |            |          |          |
|-------------|-------------|-----|------|-----|-------|------------|----------|----------|
| HSP1452_CC1 | HSP1654_CC2 | 5   | 19   | 847 | 54922 | 59.5137992 | 1.21E-14 | 3.22E-05 |
| HSP1452_CC1 | HSP1655_CC2 | 5   | 19   | 847 | 54922 | 59.5137992 | 1.21E-14 | 3.22E-05 |
| HSP1452_CC1 | HSP1795_CC2 | 5   | 9    | 847 | 54932 | 108.839786 | 0        | 3.22E-05 |
| HSP1452_CC1 | HSP1798_CC1 | 5   | 14   | 847 | 54927 | 77.6663448 | 0        | 3.22E-05 |
| HSP1452_CC1 | HSP1799_CC1 | 5   | 14   | 847 | 54927 | 77.6663448 | 0        | 3.22E-05 |
| HSP1452_CC1 | HSP1015_CC1 | 22  | 58   | 830 | 54883 | 359.400114 | 0        | 2.12E-05 |
| HSP1452_CC1 | HSP1016_CC1 | 29  | 69   | 823 | 54872 | 514.204209 | 0        | 2.12E-05 |
| HSP1452_CC1 | HSP1017_CC1 | 37  | 79   | 815 | 54862 | 712.951221 | 0        | 2.12E-05 |
| HSP1452_CC1 | HSP1018_CC1 | 38  | 87   | 814 | 54854 | 694.526785 | 0        | 2.12E-05 |
| HSP1452_CC1 | HSP1019_CC1 | 36  | 90   | 816 | 54851 | 614.22711  | 0        | 2.12E-05 |
| HSP1452_CC1 | HSP1020_CC1 | 34  | 85   | 818 | 54856 | 580.030445 | 0        | 2.12E-05 |
| HSP1452_CC1 | HSP1021_CC2 | 28  | 79   | 824 | 54862 | 432.875218 | 0        | 2.12E-05 |
| HSP1452_CC1 | HSP1023_CC2 | 18  | 57   | 834 | 54884 | 252.224926 | 0        | 2.12E-05 |
| HSP1452_CC1 | HSP1096_CC1 | 268 | 5519 | 584 | 49422 | 413.691652 | 0        | 2.12E-05 |
| HSP1452_CC1 | HSP1386_CC2 | 45  | 168  | 807 | 54773 | 546.213378 | 0        | 2.12E-05 |
| HSP1452_CC1 | HSP1629_CC1 | 7   | 23   | 845 | 54918 | 94.9162312 | 0        | 2.12E-05 |
| HSP1451_CC1 | HSP1087_CC1 | 7   | 50   | 793 | 54943 | 47.49922   | 5.50E-12 | 3.22E-05 |
| HSP1451_CC1 | HSP1088_CC1 | 14  | 73   | 786 | 54920 | 132.468719 | 0        | 3.22E-05 |
| HSP1451_CC1 | HSP1089_CC1 | 19  | 88   | 781 | 54905 | 202.109528 | 0        | 3.22E-05 |
| HSP1451_CC1 | HSP1090_CC1 | 23  | 109  | 777 | 54884 | 239.376625 | 0        | 3.22E-05 |
| HSP1451_CC1 | HSP1091_CC1 | 24  | 127  | 776 | 54866 | 224.007543 | 0        | 3.22E-05 |
| HSP1451_CC1 | HSP1092_CC1 | 24  | 122  | 776 | 54871 | 233.18199  | 0        | 3.22E-05 |
| HSP1451_CC1 | HSP1093_CC1 | 24  | 110  | 776 | 54883 | 258.015075 | 0        | 3.22E-05 |
| HSP1451_CC1 | HSP1094_CC2 | 27  | 116  | 773 | 54877 | 308.792286 | 0        | 3.22E-05 |
| HSP1451_CC1 | HSP1095_CC2 | 26  | 93   | 774 | 54900 | 351.665226 | 0        | 3.22E-05 |
| HSP1451_CC1 | HSP1096_CC2 | 15  | 55   | 785 | 54938 | 198.259985 | 0        | 3.22E-05 |
| HSP1451_CC1 | HSP1264_CC2 | 6   | 16   | 794 | 54977 | 103.968683 | 0        | 3.22E-05 |
| HSP1451_CC1 | HSP1265_CC1 | 6   | 22   | 794 | 54971 | 79.2442654 | 0        | 3.22E-05 |
| HSP1451_CC1 | HSP1266_CC1 | 5   | 18   | 795 | 54975 | 67.1252619 | 2.22E-16 | 3.22E-05 |
| HSP1451_CC1 | HSP1267_CC1 | 5   | 10   | 795 | 54983 | 108.028109 | 0        | 3.22E-05 |
| HSP1451_CC1 | HSP1795_CC2 | 5   | 9    | 795 | 54984 | 116.437045 | 0        | 3.22E-05 |
| HSP1451_CC1 | HSP1798_CC1 | 5   | 14   | 795 | 54979 | 83.2590125 | 0        | 3.22E-05 |
| HSP1451_CC1 | HSP1799_CC1 | 5   | 14   | 795 | 54979 | 83.2590125 | 0        | 3.22E-05 |
| HSP1451_CC1 | HSP1015_CC1 | 22  | 58   | 778 | 54935 | 385.14853  | 0        | 2.12E-05 |
| HSP1451_CC1 | HSP1016_CC1 | 29  | 69   | 771 | 54924 | 550.74954  | 0        | 2.12E-05 |
| HSP1451_CC1 | HSP1017_CC1 | 37  | 79   | 763 | 54914 | 763.238247 | 0        | 2.12E-05 |
| HSP1451_CC1 | HSP1018_CC1 | 38  | 87   | 762 | 54906 | 743.750104 | 0        | 2.12E-05 |
| HSP1451_CC1 | HSP1019_CC1 | 36  | 90   | 764 | 54903 | 658.045565 | 0        | 2.12E-05 |
| HSP1451_CC1 | HSP1020_CC1 | 34  | 85   | 766 | 54908 | 621.409338 | 0        | 2.12E-05 |
| HSP1451_CC1 | HSP1021_CC2 | 28  | 79   | 772 | 54914 | 464.066902 | 0        | 2.12E-05 |
| HSP1451_CC1 | HSP1023_CC2 | 18  | 57   | 782 | 54936 | 270.596139 | 0        | 2.12E-05 |
| HSP1451_CC1 | HSP1096_CC1 | 255 | 5532 | 545 | 49461 | 403.676405 | 0        | 2.12E-05 |
| HSP1451_CC1 | HSP1386_CC2 | 40  | 173  | 760 | 54820 | 455.171439 | 0        | 2.12E-05 |
| HSP1451_CC1 | HSP1629_CC1 | 6   | 24   | 794 | 54969 | 73.2081724 | 0        | 2.12E-05 |
| HSP1450_CC1 | HSP1087_CC1 | 6   | 51   | 705 | 55031 | 38.8209908 | 4.65E-10 | 3.22E-05 |
| HSP1450_CC1 | HSP1088_CC1 | 11  | 76   | 700 | 55006 | 89.5254395 | 0        | 3.22E-05 |
| HSP1450_CC1 | HSP1089_CC1 | 16  | 91   | 695 | 54991 | 159.441387 | 0        | 3.22E-05 |
| HSP1450_CC1 | HSP1090_CC1 | 18  | 114  | 693 | 54968 | 160.716684 | 0        | 3.22E-05 |

|             |             |             |     |      |     |     |       |            |          |          |
|-------------|-------------|-------------|-----|------|-----|-----|-------|------------|----------|----------|
| HSP1450_CC1 | HSP1091_CC1 |             | 19  |      | 132 | 692 | 54950 | 153.89997  | 0        | 3.22E-05 |
| HSP1450_CC1 | HSP1092_CC1 |             | 20  |      | 126 | 691 | 54956 | 179.602829 | 0        | 3.22E-05 |
| HSP1450_CC1 | HSP1093_CC1 |             | 20  |      | 114 | 691 | 54968 | 198.957094 | 0        | 3.22E-05 |
| HSP1450_CC1 | HSP1094_CC2 |             | 21  |      | 122 | 690 | 54960 | 204.951229 | 0        | 3.22E-05 |
| HSP1450_CC1 | HSP1095_CC2 |             | 21  |      | 98  | 690 | 54984 | 254.094505 | 0        | 3.22E-05 |
| HSP1450_CC1 | HSP1096_CC2 |             | 12  |      | 58  | 699 | 55024 | 140.279868 | 0        | 3.22E-05 |
| HSP1450_CC1 | HSP1264_CC2 |             | 5   |      | 17  | 706 | 55065 | 80.5094554 | 0        | 3.22E-05 |
| HSP1450_CC1 | HSP1265_CC1 |             | 5   |      | 23  | 706 | 55059 | 61.2309981 | 5.11E-15 | 3.22E-05 |
| HSP1450_CC1 |             | HSP1015_CC1 | 21  | 59   |     | 690 | 55023 | 397.216027 | 0        | 2.12E-05 |
| HSP1450_CC1 |             | HSP1016_CC1 | 27  | 71   |     | 684 | 55011 | 538.778507 | 0        | 2.12E-05 |
| HSP1450_CC1 |             | HSP1017_CC1 | 35  | 81   |     | 676 | 55001 | 771.577211 | 0        | 2.12E-05 |
| HSP1450_CC1 |             | HSP1018_CC1 | 36  | 89   |     | 675 | 54993 | 754.465342 | 0        | 2.12E-05 |
| HSP1450_CC1 |             | HSP1019_CC1 | 33  | 93   |     | 678 | 54989 | 623.151283 | 0        | 2.12E-05 |
| HSP1450_CC1 |             | HSP1020_CC1 | 31  | 88   |     | 680 | 54994 | 581.860803 | 0        | 2.12E-05 |
| HSP1450_CC1 |             | HSP1021_CC2 | 27  | 80   |     | 684 | 55002 | 489.153918 | 0        | 2.12E-05 |
| HSP1450_CC1 |             | HSP1023_CC2 | 17  | 58   |     | 694 | 55024 | 273.175083 | 0        | 2.12E-05 |
| HSP1450_CC1 |             | HSP1078_CC1 | 8   | 146  |     | 703 | 54936 | 18.8657241 | 1.40E-05 | 2.12E-05 |
| HSP1450_CC1 |             | HSP1096_CC1 | 236 | 5551 |     | 475 | 49531 | 403.43225  | 0        | 2.12E-05 |
| HSP1450_CC1 |             | HSP1386_CC2 | 35  | 178  |     | 676 | 54904 | 390.463238 | 0        | 2.12E-05 |
| HSP1450_CC1 |             | HSP1629_CC1 | 5   | 25   |     | 706 | 55057 | 56.5252838 | 5.55E-14 | 2.12E-05 |
| HSP1449_CC1 | HSP1088_CC1 |             | 9   |      | 78  | 619 | 55087 | 66.5461969 | 3.33E-16 | 3.22E-05 |
| HSP1449_CC1 | HSP1089_CC1 |             | 13  |      | 94  | 615 | 55071 | 117.065139 | 0        | 3.22E-05 |
| HSP1449_CC1 | HSP1090_CC1 |             | 14  |      | 118 | 614 | 55047 | 106.855939 | 0        | 3.22E-05 |
| HSP1449_CC1 | HSP1091_CC1 |             | 15  |      | 136 | 613 | 55029 | 105.551159 | 0        | 3.22E-05 |
| HSP1449_CC1 | HSP1092_CC1 |             | 16  |      | 130 | 612 | 55035 | 127.182357 | 0        | 3.22E-05 |
| HSP1449_CC1 | HSP1093_CC1 |             | 16  |      | 118 | 612 | 55047 | 141.16108  | 0        | 3.22E-05 |
| HSP1449_CC1 | HSP1094_CC2 |             | 17  |      | 126 | 611 | 55039 | 149.215831 | 0        | 3.22E-05 |
| HSP1449_CC1 | HSP1095_CC2 |             | 17  |      | 102 | 611 | 55063 | 185.57969  | 0        | 3.22E-05 |
| HSP1449_CC1 | HSP1096_CC2 |             | 8   |      | 62  | 620 | 55103 | 66.8506024 | 3.33E-16 | 3.22E-05 |
| HSP1449_CC1 | HSP1264_CC2 |             | 5   |      | 17  | 623 | 55148 | 92.2795191 | 0        | 3.22E-05 |
| HSP1449_CC1 | HSP1265_CC1 |             | 5   |      | 23  | 623 | 55142 | 70.4668309 | 0        | 3.22E-05 |
| HSP1449_CC1 |             | HSP1015_CC1 | 19  | 61   |     | 609 | 55104 | 368.471475 | 0        | 2.12E-05 |
| HSP1449_CC1 |             | HSP1016_CC1 | 24  | 74   |     | 604 | 55091 | 481.53496  | 0        | 2.12E-05 |
| HSP1449_CC1 |             | HSP1017_CC1 | 31  | 85   |     | 597 | 55080 | 684.42951  | 0        | 2.12E-05 |
| HSP1449_CC1 |             | HSP1018_CC1 | 33  | 92   |     | 595 | 55073 | 719.08851  | 0        | 2.12E-05 |
| HSP1449_CC1 |             | HSP1019_CC1 | 30  | 96   |     | 598 | 55069 | 583.882389 | 0        | 2.12E-05 |
| HSP1449_CC1 |             | HSP1020_CC1 | 28  | 91   |     | 600 | 55074 | 537.841934 | 0        | 2.12E-05 |
| HSP1449_CC1 |             | HSP1021_CC2 | 26  | 81   |     | 602 | 55084 | 517.292287 | 0        | 2.12E-05 |
| HSP1449_CC1 |             | HSP1023_CC2 | 16  | 59   |     | 612 | 55106 | 275.560705 | 0        | 2.12E-05 |
| HSP1449_CC1 |             | HSP1078_CC1 | 8   | 146  |     | 620 | 55019 | 22.9762295 | 1.64E-06 | 2.12E-05 |
| HSP1449_CC1 |             | HSP1096_CC1 | 206 | 5581 |     | 422 | 49584 | 343.73908  | 0        | 2.12E-05 |
| HSP1449_CC1 |             | HSP1386_CC2 | 33  | 180  |     | 595 | 54985 | 396.58054  | 0        | 2.12E-05 |
| HSP1449_CC1 |             | HSP1629_CC1 | 5   | 25   |     | 623 | 55140 | 65.1408242 | 6.66E-16 | 2.12E-05 |
| HSP1447_CC1 | HSP1088_CC1 |             | 6   |      | 81  | 483 | 55223 | 36.349471  | 1.65E-09 | 3.22E-05 |
| HSP1447_CC1 | HSP1089_CC1 |             | 10  |      | 97  | 479 | 55207 | 88.5137349 | 0        | 3.22E-05 |
| HSP1447_CC1 | HSP1090_CC1 |             | 11  |      | 121 | 478 | 55183 | 84.6858582 | 0        | 3.22E-05 |
| HSP1447_CC1 | HSP1091_CC1 |             | 12  |      | 139 | 477 | 55165 | 87.1277091 | 0        | 3.22E-05 |
| HSP1447_CC1 | HSP1092_CC1 |             | 13  |      | 133 | 476 | 55171 | 108.583116 | 0        | 3.22E-05 |

|             |             |     |      |     |       |            |          |          |
|-------------|-------------|-----|------|-----|-------|------------|----------|----------|
| HSP1447_CC1 | HSP1093_CC1 | 13  | 121  | 476 | 55183 | 120.413826 | 0        | 3.22E-05 |
| HSP1447_CC1 | HSP1094_CC2 | 14  | 129  | 475 | 55175 | 131.119133 | 0        | 3.22E-05 |
| HSP1447_CC1 | HSP1095_CC2 | 12  | 107  | 477 | 55197 | 116.374878 | 0        | 3.22E-05 |
| HSP1447_CC1 | HSP1096_CC2 | 6   | 64   | 483 | 55240 | 47.7696065 | 4.79E-12 | 3.22E-05 |
| HSP1447_CC1 | HSP1015_CC1 | 14  | 66   | 475 | 55238 | 254.832326 | 0        | 2.12E-05 |
| HSP1447_CC1 | HSP1016_CC1 | 17  | 81   | 472 | 55223 | 306.546505 | 0        | 2.12E-05 |
| HSP1447_CC1 | HSP1017_CC1 | 23  | 93   | 466 | 55211 | 480.536326 | 0        | 2.12E-05 |
| HSP1447_CC1 | HSP1018_CC1 | 26  | 99   | 463 | 55205 | 572.415527 | 0        | 2.12E-05 |
| HSP1447_CC1 | HSP1019_CC1 | 24  | 102  | 465 | 55202 | 479.9677   | 0        | 2.12E-05 |
| HSP1447_CC1 | HSP1020_CC1 | 21  | 98   | 468 | 55206 | 386.069706 | 0        | 2.12E-05 |
| HSP1447_CC1 | HSP1021_CC2 | 19  | 88   | 470 | 55216 | 351.629216 | 0        | 2.12E-05 |
| HSP1447_CC1 | HSP1023_CC2 | 13  | 62   | 476 | 55242 | 234.117809 | 0        | 2.12E-05 |
| HSP1447_CC1 | HSP1078_CC1 | 7   | 147  | 482 | 55157 | 23.9282363 | 0.000001 | 2.12E-05 |
| HSP1447_CC1 | HSP1079_CC1 | 6   | 111  | 483 | 55193 | 24.3964839 | 7.84E-07 | 2.12E-05 |
| HSP1447_CC1 | HSP1096_CC1 | 168 | 5619 | 321 | 49685 | 305.241184 | 0        | 2.12E-05 |
| HSP1447_CC1 | HSP1386_CC2 | 25  | 188  | 464 | 55116 | 290.298807 | 0        | 2.12E-05 |
| HSP1230_CC1 | HSP1552_CC1 | 26  | 67   | 257 | 55443 | 1390.86906 | 0        | 2.12E-05 |
| HSP1230_CC1 | HSP1555_CC1 | 38  | 125  | 245 | 55385 | 1684.78693 | 0        | 2.12E-05 |
| HSP1230_CC1 | HSP1556_CC1 | 42  | 136  | 241 | 55374 | 1886.22049 | 0        | 2.12E-05 |
| HSP1230_CC1 | HSP1557_CC1 | 43  | 157  | 240 | 55353 | 1752.79358 | 0        | 2.12E-05 |
| HSP1230_CC1 | HSP1558_CC1 | 41  | 161  | 242 | 55349 | 1573.29828 | 0        | 2.12E-05 |
| HSP1230_CC1 | HSP1559_CC1 | 40  | 146  | 243 | 55364 | 1630.52247 | 0        | 2.12E-05 |
| HSP1230_CC1 | HSP1560_CC1 | 35  | 142  | 248 | 55368 | 1306.0904  | 0        | 2.12E-05 |
| HSP1230_CC1 | HSP1561_CC1 | 32  | 122  | 251 | 55388 | 1257.52201 | 0        | 2.12E-05 |
| HSP1230_CC1 | HSP1564_CC1 | 12  | 79   | 271 | 55431 | 290.376786 | 0        | 2.12E-05 |
| HSP1230_CC1 | HSP249_CC1  | 54  | 752  | 229 | 54758 | 621.428689 | 0        | 2.12E-05 |
| HSP1230_CC1 | HSP250_CC1  | 58  | 820  | 225 | 54690 | 657.443128 | 0        | 2.12E-05 |
| HSP1230_CC1 | HSP251_CC1  | 61  | 859  | 222 | 54651 | 694.972907 | 0        | 2.12E-05 |
| HSP1230_CC1 | HSP252_CC1  | 60  | 868  | 223 | 54642 | 663.860211 | 0        | 2.12E-05 |
| HSP1230_CC1 | HSP253_CC1  | 58  | 865  | 225 | 54645 | 620.578258 | 0        | 2.12E-05 |
| HSP1230_CC1 | HSP254_CC1  | 59  | 854  | 224 | 54656 | 652.22708  | 0        | 2.12E-05 |
| HSP1230_CC1 | HSP255_CC1  | 54  | 837  | 229 | 54673 | 553.330818 | 0        | 2.12E-05 |
| HSP1230_CC1 | HSP256_CC1  | 51  | 816  | 232 | 54694 | 504.195622 | 0        | 2.12E-05 |
| HSP1230_CC1 | HSP257_CC1  | 49  | 785  | 234 | 54725 | 483.442327 | 0        | 2.12E-05 |
| HSP1230_CC1 | HSP258_CC1  | 45  | 747  | 238 | 54763 | 426.272493 | 0        | 2.12E-05 |
| HSP1229_CC1 | HSP1335_CC1 | 5   | 209  | 343 | 55236 | 10.1664768 | 0.00143  | 3.22E-05 |
| HSP1229_CC1 | HSP1338_CC1 | 5   | 190  | 343 | 55255 | 11.8861537 | 0.000566 | 3.22E-05 |
| HSP1229_CC1 | HSP1552_CC1 | 31  | 62   | 317 | 55383 | 1607.96173 | 0        | 2.12E-05 |
| HSP1229_CC1 | HSP1555_CC1 | 43  | 120  | 305 | 55325 | 1749.66243 | 0        | 2.12E-05 |
| HSP1229_CC1 | HSP1556_CC1 | 47  | 131  | 301 | 55314 | 1914.77175 | 0        | 2.12E-05 |
| HSP1229_CC1 | HSP1557_CC1 | 48  | 152  | 300 | 55293 | 1769.52894 | 0        | 2.12E-05 |
| HSP1229_CC1 | HSP1558_CC1 | 46  | 156  | 302 | 55289 | 1604.48153 | 0        | 2.12E-05 |
| HSP1229_CC1 | HSP1559_CC1 | 44  | 142  | 304 | 55303 | 1597.16974 | 0        | 2.12E-05 |
| HSP1229_CC1 | HSP1560_CC1 | 39  | 138  | 309 | 55307 | 1313.13997 | 0        | 2.12E-05 |
| HSP1229_CC1 | HSP1561_CC1 | 36  | 118  | 312 | 55327 | 1289.76925 | 0        | 2.12E-05 |
| HSP1229_CC1 | HSP1564_CC1 | 14  | 77   | 334 | 55368 | 320.400131 | 0        | 2.12E-05 |
| HSP1229_CC1 | HSP249_CC1  | 68  | 738  | 280 | 54707 | 805.391624 | 0        | 2.12E-05 |
| HSP1229_CC1 | HSP250_CC1  | 72  | 806  | 276 | 54639 | 826.159075 | 0        | 2.12E-05 |

|             |             |             |    |      |     |       |            |            |                   |
|-------------|-------------|-------------|----|------|-----|-------|------------|------------|-------------------|
| HSP1229_CC1 |             | HSP251_CC1  | 75 | 845  | 273 | 54600 | 855.335686 | 0          | 2.12E-05          |
| HSP1229_CC1 |             | HSP252_CC1  | 74 | 854  | 274 | 54591 | 822.569299 | 0          | 2.12E-05          |
| HSP1229_CC1 |             | HSP253_CC1  | 72 | 851  | 276 | 54594 | 779.901876 | 0          | 2.12E-05          |
| HSP1229_CC1 |             | HSP254_CC1  | 72 | 841  | 276 | 54604 | 789.785602 | 0          | 2.12E-05          |
| HSP1229_CC1 |             | HSP255_CC1  | 67 | 824  | 281 | 54621 | 694.656018 | 0          | 2.12E-05          |
| HSP1229_CC1 |             | HSP256_CC1  | 64 | 803  | 284 | 54642 | 648.903952 | 0          | 2.12E-05          |
| HSP1229_CC1 |             | HSP257_CC1  | 62 | 772  | 286 | 54673 | 633.518932 | 0          | 2.12E-05          |
| HSP1229_CC1 |             | HSP258_CC1  | 58 | 734  | 290 | 54711 | 581.750347 | 0          | 2.12E-05          |
| HSP1228_CC1 | HSP1335_CC1 |             | 6  |      | 208 | 388   | 55191      | 13.4794258 | 0.000241 3.22E-05 |
| HSP1228_CC1 | HSP1336_CC1 |             | 5  |      | 212 | 389   | 55187      | 7.93319888 | 0.004854 3.22E-05 |
| HSP1228_CC1 | HSP1337_CC1 |             | 6  |      | 197 | 388   | 55202      | 14.7029975 | 0.000126 3.22E-05 |
| HSP1228_CC1 | HSP1338_CC1 |             | 7  |      | 188 | 387   | 55211      | 23.2046471 | 1.46E-06 3.22E-05 |
| HSP1228_CC1 | HSP1339_CC1 |             | 6  |      | 171 | 388   | 55228      | 18.2375229 | 1.95E-05 3.22E-05 |
| HSP1228_CC1 |             | HSP1386_CC1 | 19 | 1038 | 375 | 54361 | 18.301123  | 1.89E-05   | 2.12E-05          |
| HSP1228_CC1 |             | HSP1552_CC1 | 33 | 60   | 361 | 55339 | 1606.83096 | 0          | 2.12E-05          |
| HSP1228_CC1 |             | HSP1555_CC1 | 45 | 118  | 349 | 55281 | 1687.18306 | 0          | 2.12E-05          |
| HSP1228_CC1 |             | HSP1556_CC1 | 50 | 128  | 344 | 55271 | 1909.64877 | 0          | 2.12E-05          |
| HSP1228_CC1 |             | HSP1557_CC1 | 52 | 148  | 342 | 55251 | 1831.38506 | 0          | 2.12E-05          |
| HSP1228_CC1 |             | HSP1558_CC1 | 50 | 152  | 344 | 55247 | 1671.7994  | 0          | 2.12E-05          |
| HSP1228_CC1 |             | HSP1559_CC1 | 47 | 139  | 347 | 55260 | 1605.73694 | 0          | 2.12E-05          |
| HSP1228_CC1 |             | HSP1560_CC1 | 41 | 136  | 353 | 55263 | 1277.15473 | 0          | 2.12E-05          |
| HSP1228_CC1 |             | HSP1561_CC1 | 38 | 116  | 356 | 55283 | 1265.28223 | 0          | 2.12E-05          |
| HSP1228_CC1 |             | HSP1564_CC1 | 16 | 75   | 378 | 55324 | 370.222465 | 0          | 2.12E-05          |
| HSP1228_CC1 |             | HSP249_CC1  | 75 | 731  | 319 | 54668 | 862.412122 | 0          | 2.12E-05          |
| HSP1228_CC1 |             | HSP250_CC1  | 81 | 797  | 313 | 54602 | 923.326886 | 0          | 2.12E-05          |
| HSP1228_CC1 |             | HSP251_CC1  | 85 | 835  | 309 | 54564 | 971.333535 | 0          | 2.12E-05          |
| HSP1228_CC1 |             | HSP252_CC1  | 85 | 843  | 309 | 54556 | 961.714696 | 0          | 2.12E-05          |
| HSP1228_CC1 |             | HSP253_CC1  | 83 | 840  | 311 | 54559 | 919.014047 | 0          | 2.12E-05          |
| HSP1228_CC1 |             | HSP254_CC1  | 82 | 831  | 312 | 54568 | 906.472197 | 0          | 2.12E-05          |
| HSP1228_CC1 |             | HSP255_CC1  | 77 | 814  | 317 | 54585 | 813.225997 | 0          | 2.12E-05          |
| HSP1228_CC1 |             | HSP256_CC1  | 74 | 793  | 320 | 54606 | 769.829188 | 0          | 2.12E-05          |
| HSP1228_CC1 |             | HSP257_CC1  | 72 | 762  | 322 | 54637 | 758.710807 | 0          | 2.12E-05          |
| HSP1228_CC1 |             | HSP258_CC1  | 67 | 725  | 327 | 54674 | 688.781636 | 0          | 2.12E-05          |
| HSP1227_CC1 | HSP1334_CC1 |             | 5  |      | 186 | 418   | 55184      | 8.80898007 | 0.002998 3.22E-05 |
| HSP1227_CC1 | HSP1335_CC1 |             | 8  |      | 206 | 415   | 55164      | 25.3574696 | 4.76E-07 3.22E-05 |
| HSP1227_CC1 | HSP1336_CC1 |             | 8  |      | 209 | 415   | 55161      | 24.8301951 | 6.26E-07 3.22E-05 |
| HSP1227_CC1 | HSP1337_CC1 |             | 9  |      | 194 | 414   | 55176      | 36.5778491 | 1.47E-09 3.22E-05 |
| HSP1227_CC1 | HSP1338_CC1 |             | 10 |      | 185 | 413   | 55185      | 49.6674212 | 1.82E-12 3.22E-05 |
| HSP1227_CC1 | HSP1339_CC1 |             | 9  |      | 168 | 414   | 55202      | 44.1762123 | 3.00E-11 3.22E-05 |
| HSP1227_CC1 | HSP1340_CC1 |             | 6  |      | 138 | 417   | 55232      | 22.2924484 | 2.34E-06 3.22E-05 |
| HSP1227_CC1 |             | HSP1386_CC1 | 23 | 1034 | 400 | 54336 | 28.7847402 | 8.09E-08   | 2.12E-05          |
| HSP1227_CC1 |             | HSP1552_CC1 | 34 | 59   | 389 | 55311 | 1586.87179 | 0          | 2.12E-05          |
| HSP1227_CC1 |             | HSP1555_CC1 | 46 | 117  | 377 | 55253 | 1638.66146 | 0          | 2.12E-05          |
| HSP1227_CC1 |             | HSP1556_CC1 | 51 | 127  | 372 | 55243 | 1846.54178 | 0          | 2.12E-05          |
| HSP1227_CC1 |             | HSP1557_CC1 | 53 | 147  | 370 | 55223 | 1767.71938 | 0          | 2.12E-05          |
| HSP1227_CC1 |             | HSP1558_CC1 | 51 | 151  | 372 | 55219 | 1615.94356 | 0          | 2.12E-05          |
| HSP1227_CC1 |             | HSP1559_CC1 | 48 | 138  | 375 | 55232 | 1556.19482 | 0          | 2.12E-05          |
| HSP1227_CC1 |             | HSP1560_CC1 | 42 | 135  | 381 | 55235 | 1245.21541 | 0          | 2.12E-05          |

|             |             |             |    |      |     |       |            |            |          |          |
|-------------|-------------|-------------|----|------|-----|-------|------------|------------|----------|----------|
| HSP1227_CC1 |             | HSP1561_CC1 | 38 | 116  | 385 | 55254 | 1174.04585 | 0          | 2.12E-05 |          |
| HSP1227_CC1 |             | HSP1564_CC1 | 15 | 76   | 408 | 55294 | 299.568313 | 0          | 2.12E-05 |          |
| HSP1227_CC1 |             | HSP249_CC1  | 79 | 727  | 344 | 54643 | 888.906228 | 0          | 2.12E-05 |          |
| HSP1227_CC1 |             | HSP250_CC1  | 85 | 793  | 338 | 54577 | 943.937236 | 0          | 2.12E-05 |          |
| HSP1227_CC1 |             | HSP251_CC1  | 89 | 831  | 334 | 54539 | 988.256028 | 0          | 2.12E-05 |          |
| HSP1227_CC1 |             | HSP252_CC1  | 90 | 838  | 333 | 54532 | 1002.45105 | 0          | 2.12E-05 |          |
| HSP1227_CC1 |             | HSP253_CC1  | 90 | 833  | 333 | 54537 | 1008.71077 | 0          | 2.12E-05 |          |
| HSP1227_CC1 |             | HSP254_CC1  | 88 | 825  | 335 | 54545 | 972.849038 | 0          | 2.12E-05 |          |
| HSP1227_CC1 |             | HSP255_CC1  | 83 | 808  | 340 | 54562 | 881.208779 | 0          | 2.12E-05 |          |
| HSP1227_CC1 |             | HSP256_CC1  | 80 | 787  | 343 | 54583 | 839.529314 | 0          | 2.12E-05 |          |
| HSP1227_CC1 |             | HSP257_CC1  | 78 | 756  | 345 | 54614 | 831.148063 | 0          | 2.12E-05 |          |
| HSP1227_CC1 |             | HSP258_CC1  | 71 | 721  | 352 | 54649 | 719.106811 | 0          | 2.12E-05 |          |
| HSP1226_CC1 | HSP1334_CC1 |             | 6  |      | 185 | 422   | 55180      | 14.192282  | 0.000165 | 3.22E-05 |
| HSP1226_CC1 | HSP1335_CC1 |             | 9  |      | 205 | 419   | 55160      | 33.3655028 | 7.64E-09 | 3.22E-05 |
| HSP1226_CC1 | HSP1336_CC1 |             | 10 |      | 207 | 418   | 55158      | 42.2240988 | 8.14E-11 | 3.22E-05 |
| HSP1226_CC1 | HSP1337_CC1 |             | 11 |      | 192 | 417   | 55173      | 57.9113598 | 2.74E-14 | 3.22E-05 |
| HSP1226_CC1 | HSP1338_CC1 |             | 12 |      | 183 | 416   | 55182      | 74.5907705 | 0        | 3.22E-05 |
| HSP1226_CC1 | HSP1339_CC1 |             | 11 |      | 166 | 417   | 55199      | 69.2211637 | 1.11E-16 | 3.22E-05 |
| HSP1226_CC1 | HSP1340_CC1 |             | 8  |      | 136 | 420   | 55229      | 43.4862793 | 4.27E-11 | 3.22E-05 |
| HSP1226_CC1 |             | HSP1386_CC1 | 25 | 1032 | 403 | 54333 | 36.1451374 | 1.83E-09   |          | 2.12E-05 |
| HSP1226_CC1 |             | HSP1552_CC1 | 33 | 60   | 395 | 55305 | 1474.91142 | 0          |          | 2.12E-05 |
| HSP1226_CC1 |             | HSP1555_CC1 | 45 | 118  | 383 | 55247 | 1547.0752  | 0          |          | 2.12E-05 |
| HSP1226_CC1 |             | HSP1556_CC1 | 50 | 128  | 378 | 55237 | 1751.20692 | 0          |          | 2.12E-05 |
| HSP1226_CC1 |             | HSP1557_CC1 | 53 | 147  | 375 | 55218 | 1746.00989 | 0          |          | 2.12E-05 |
| HSP1226_CC1 |             | HSP1558_CC1 | 51 | 151  | 377 | 55214 | 1596.04118 | 0          |          | 2.12E-05 |
| HSP1226_CC1 |             | HSP1559_CC1 | 48 | 138  | 380 | 55227 | 1537.05343 | 0          |          | 2.12E-05 |
| HSP1226_CC1 |             | HSP1560_CC1 | 41 | 136  | 387 | 55229 | 1170.04468 | 0          |          | 2.12E-05 |
| HSP1226_CC1 |             | HSP1561_CC1 | 37 | 117  | 391 | 55248 | 1097.43309 | 0          |          | 2.12E-05 |
| HSP1226_CC1 |             | HSP1564_CC1 | 15 | 76   | 413 | 55289 | 295.758035 | 0          |          | 2.12E-05 |
| HSP1226_CC1 |             | HSP249_CC1  | 80 | 726  | 348 | 54639 | 901.109999 | 0          |          | 2.12E-05 |
| HSP1226_CC1 |             | HSP250_CC1  | 86 | 792  | 342 | 54573 | 955.067198 | 0          |          | 2.12E-05 |
| HSP1226_CC1 |             | HSP251_CC1  | 90 | 830  | 338 | 54535 | 998.77488  | 0          |          | 2.12E-05 |
| HSP1226_CC1 |             | HSP252_CC1  | 91 | 837  | 337 | 54528 | 1012.8499  | 0          |          | 2.12E-05 |
| HSP1226_CC1 |             | HSP253_CC1  | 91 | 832  | 337 | 54533 | 1019.17526 | 0          |          | 2.12E-05 |
| HSP1226_CC1 |             | HSP254_CC1  | 89 | 824  | 339 | 54541 | 983.473028 | 0          |          | 2.12E-05 |
| HSP1226_CC1 |             | HSP255_CC1  | 84 | 807  | 344 | 54558 | 892.142742 | 0          |          | 2.12E-05 |
| HSP1226_CC1 |             | HSP256_CC1  | 81 | 786  | 347 | 54579 | 850.773475 | 0          |          | 2.12E-05 |
| HSP1226_CC1 |             | HSP257_CC1  | 79 | 755  | 349 | 54610 | 842.858859 | 0          |          | 2.12E-05 |
| HSP1226_CC1 |             | HSP258_CC1  | 71 | 721  | 357 | 54644 | 709.218702 | 0          |          | 2.12E-05 |
| HSP1225_CC1 | HSP1333_CC1 |             | 8  |      | 161 | 410   | 55214      | 36.193267  | 1.79E-09 | 3.22E-05 |
| HSP1225_CC1 | HSP1334_CC1 |             | 10 |      | 181 | 408   | 55194      | 51.8786738 | 5.90E-13 | 3.22E-05 |
| HSP1225_CC1 | HSP1335_CC1 |             | 14 |      | 200 | 404   | 55175      | 96.947799  | 0        | 3.22E-05 |
| HSP1225_CC1 | HSP1336_CC1 |             | 14 |      | 203 | 404   | 55172      | 95.2662799 | 0        | 3.22E-05 |
| HSP1225_CC1 | HSP1337_CC1 |             | 15 |      | 188 | 403   | 55187      | 120.803639 | 0        | 3.22E-05 |
| HSP1225_CC1 | HSP1338_CC1 |             | 16 |      | 179 | 402   | 55196      | 146.294581 | 0        | 3.22E-05 |
| HSP1225_CC1 | HSP1339_CC1 |             | 15 |      | 162 | 403   | 55213      | 142.515517 | 0        | 3.22E-05 |
| HSP1225_CC1 | HSP1340_CC1 |             | 11 |      | 133 | 407   | 55242      | 92.1623909 | 0        | 3.22E-05 |
| HSP1225_CC1 | HSP1341_CC2 |             | 6  |      | 106 | 412   | 55269      | 32.0460627 | 1.51E-08 | 3.22E-05 |

|             |             |             |    |      |     |       |            |          |          |
|-------------|-------------|-------------|----|------|-----|-------|------------|----------|----------|
| HSP1225_CC1 |             | HSP1386_CC1 | 27 | 1030 | 391 | 54345 | 47.2174288 | 6.35E-12 | 2.12E-05 |
| HSP1225_CC1 |             | HSP1552_CC1 | 31 | 62   | 387 | 55313 | 1330.11527 | 0        | 2.12E-05 |
| HSP1225_CC1 |             | HSP1555_CC1 | 43 | 120  | 375 | 55255 | 1444.32369 | 0        | 2.12E-05 |
| HSP1225_CC1 |             | HSP1556_CC1 | 47 | 131  | 371 | 55244 | 1580.63377 | 0        | 2.12E-05 |
| HSP1225_CC1 |             | HSP1557_CC1 | 50 | 150  | 368 | 55225 | 1587.49081 | 0        | 2.12E-05 |
| HSP1225_CC1 |             | HSP1558_CC1 | 48 | 154  | 370 | 55221 | 1443.94021 | 0        | 2.12E-05 |
| HSP1225_CC1 |             | HSP1559_CC1 | 45 | 141  | 373 | 55234 | 1379.45968 | 0        | 2.12E-05 |
| HSP1225_CC1 |             | HSP1560_CC1 | 37 | 140  | 381 | 55235 | 970.013469 | 0        | 2.12E-05 |
| HSP1225_CC1 |             | HSP1561_CC1 | 33 | 121  | 385 | 55254 | 888.106975 | 0        | 2.12E-05 |
| HSP1225_CC1 |             | HSP1564_CC1 | 13 | 78   | 405 | 55297 | 224.612308 | 0        | 2.12E-05 |
| HSP1225_CC1 |             | HSP249_CC1  | 77 | 729  | 341 | 54646 | 852.509438 | 0        | 2.12E-05 |
| HSP1225_CC1 |             | HSP250_CC1  | 83 | 795  | 335 | 54580 | 908.868173 | 0        | 2.12E-05 |
| HSP1225_CC1 |             | HSP251_CC1  | 87 | 833  | 331 | 54542 | 953.778735 | 0        | 2.12E-05 |
| HSP1225_CC1 |             | HSP252_CC1  | 88 | 840  | 330 | 54535 | 968.020154 | 0        | 2.12E-05 |
| HSP1225_CC1 |             | HSP253_CC1  | 89 | 834  | 329 | 54541 | 998.249359 | 0        | 2.12E-05 |
| HSP1225_CC1 |             | HSP254_CC1  | 87 | 826  | 331 | 54549 | 962.227444 | 0        | 2.12E-05 |
| HSP1225_CC1 |             | HSP255_CC1  | 82 | 809  | 336 | 54566 | 870.2769   | 0        | 2.12E-05 |
| HSP1225_CC1 |             | HSP256_CC1  | 80 | 787  | 338 | 54588 | 851.293589 | 0        | 2.12E-05 |
| HSP1225_CC1 |             | HSP257_CC1  | 77 | 757  | 341 | 54618 | 819.441352 | 0        | 2.12E-05 |
| HSP1225_CC1 |             | HSP258_CC1  | 69 | 723  | 349 | 54652 | 685.091818 | 0        | 2.12E-05 |
| HSP1224_CC1 | HSP1333_CC1 |             | 9  | 160  | 392 | 55232 | 50.4144485 | 1.24E-12 | 3.22E-05 |
| HSP1224_CC1 | HSP1334_CC1 |             | 11 | 180  | 390 | 55212 | 68.2380437 | 1.11E-16 | 3.22E-05 |
| HSP1224_CC1 | HSP1335_CC1 |             | 15 | 199  | 386 | 55193 | 119.134445 | 0        | 3.22E-05 |
| HSP1224_CC1 | HSP1336_CC1 |             | 15 | 202  | 386 | 55190 | 117.117691 | 0        | 3.22E-05 |
| HSP1224_CC1 | HSP1337_CC1 |             | 16 | 187  | 385 | 55205 | 146.501636 | 0        | 3.22E-05 |
| HSP1224_CC1 | HSP1338_CC1 |             | 17 | 178  | 384 | 55214 | 175.476316 | 0        | 3.22E-05 |
| HSP1224_CC1 | HSP1339_CC1 |             | 16 | 161  | 385 | 55231 | 172.287385 | 0        | 3.22E-05 |
| HSP1224_CC1 | HSP1340_CC1 |             | 12 | 132  | 389 | 55260 | 117.313402 | 0        | 3.22E-05 |
| HSP1224_CC1 | HSP1341_CC2 |             | 7  | 105  | 394 | 55287 | 48.1181283 | 4.01E-12 | 3.22E-05 |
| HSP1224_CC1 |             | HSP1386_CC1 | 26 | 1031 | 375 | 54361 | 45.7697963 | 1.33E-11 | 2.12E-05 |
| HSP1224_CC1 |             | HSP1552_CC1 | 30 | 63   | 371 | 55329 | 1298.61549 | 0        | 2.12E-05 |
| HSP1224_CC1 |             | HSP1555_CC1 | 42 | 121  | 359 | 55271 | 1437.39899 | 0        | 2.12E-05 |
| HSP1224_CC1 |             | HSP1556_CC1 | 46 | 132  | 355 | 55260 | 1579.61869 | 0        | 2.12E-05 |
| HSP1224_CC1 |             | HSP1557_CC1 | 49 | 151  | 352 | 55241 | 1590.84462 | 0        | 2.12E-05 |
| HSP1224_CC1 |             | HSP1558_CC1 | 47 | 155  | 354 | 55237 | 1444.55379 | 0        | 2.12E-05 |
| HSP1224_CC1 |             | HSP1559_CC1 | 44 | 142  | 357 | 55250 | 1375.97793 | 0        | 2.12E-05 |
| HSP1224_CC1 |             | HSP1560_CC1 | 36 | 141  | 365 | 55251 | 957.922843 | 0        | 2.12E-05 |
| HSP1224_CC1 |             | HSP1561_CC1 | 32 | 122  | 369 | 55270 | 870.908073 | 0        | 2.12E-05 |
| HSP1224_CC1 |             | HSP1564_CC1 | 12 | 79   | 389 | 55313 | 198.571921 | 0        | 2.12E-05 |
| HSP1224_CC1 |             | HSP249_CC1  | 73 | 733  | 328 | 54659 | 796.860565 | 0        | 2.12E-05 |
| HSP1224_CC1 |             | HSP250_CC1  | 78 | 800  | 323 | 54592 | 833.4396   | 0        | 2.12E-05 |
| HSP1224_CC1 |             | HSP251_CC1  | 82 | 838  | 319 | 54554 | 880.24221  | 0        | 2.12E-05 |
| HSP1224_CC1 |             | HSP252_CC1  | 83 | 845  | 318 | 54547 | 894.740705 | 0        | 2.12E-05 |
| HSP1224_CC1 |             | HSP253_CC1  | 84 | 839  | 317 | 54553 | 924.087107 | 0        | 2.12E-05 |
| HSP1224_CC1 |             | HSP254_CC1  | 82 | 831  | 319 | 54561 | 888.062052 | 0        | 2.12E-05 |
| HSP1224_CC1 |             | HSP255_CC1  | 78 | 813  | 323 | 54579 | 819.333997 | 0        | 2.12E-05 |
| HSP1224_CC1 |             | HSP256_CC1  | 76 | 791  | 325 | 54601 | 799.228579 | 0        | 2.12E-05 |
| HSP1224_CC1 |             | HSP257_CC1  | 73 | 761  | 328 | 54631 | 765.89236  | 0        | 2.12E-05 |

|             |             |             |    |      |     |     |       |            |          |          |
|-------------|-------------|-------------|----|------|-----|-----|-------|------------|----------|----------|
| HSP1224_CC1 |             | HSP258_CC1  | 66 | 726  |     | 335 | 54666 | 652.825483 | 0        | 2.12E-05 |
| HSP1223_CC1 | HSP1333_CC1 |             | 9  |      | 160 | 350 | 55274 | 58.123887  | 2.46E-14 | 3.22E-05 |
| HSP1223_CC1 | HSP1334_CC1 |             | 11 |      | 180 | 348 | 55254 | 78.4555504 | 0        | 3.22E-05 |
| HSP1223_CC1 | HSP1335_CC1 |             | 16 |      | 198 | 343 | 55236 | 156.898199 | 0        | 3.22E-05 |
| HSP1223_CC1 | HSP1336_CC1 |             | 16 |      | 201 | 343 | 55233 | 154.329191 | 0        | 3.22E-05 |
| HSP1223_CC1 | HSP1337_CC1 |             | 18 |      | 185 | 341 | 55249 | 215.51922  | 0        | 3.22E-05 |
| HSP1223_CC1 | HSP1338_CC1 |             | 19 |      | 176 | 340 | 55258 | 253.477871 | 0        | 3.22E-05 |
| HSP1223_CC1 | HSP1339_CC1 |             | 18 |      | 159 | 341 | 55275 | 252.038533 | 0        | 3.22E-05 |
| HSP1223_CC1 | HSP1340_CC1 |             | 14 |      | 130 | 345 | 55304 | 186.134919 | 0        | 3.22E-05 |
| HSP1223_CC1 | HSP1341_CC2 |             | 8  |      | 104 | 351 | 55330 | 74.1527008 | 0        | 3.22E-05 |
| HSP1223_CC1 |             | HSP1386_CC1 | 25 | 1032 |     | 334 | 54402 | 49.9577437 | 1.57E-12 | 2.12E-05 |
| HSP1223_CC1 |             | HSP1552_CC1 | 26 | 67   |     | 333 | 55367 | 1087.05668 | 0        | 2.12E-05 |
| HSP1223_CC1 |             | HSP1555_CC1 | 36 | 127  |     | 323 | 55307 | 1175.69701 | 0        | 2.12E-05 |
| HSP1223_CC1 |             | HSP1556_CC1 | 39 | 139  |     | 320 | 55295 | 1263.26718 | 0        | 2.12E-05 |
| HSP1223_CC1 |             | HSP1557_CC1 | 42 | 158  |     | 317 | 55276 | 1301.02822 | 0        | 2.12E-05 |
| HSP1223_CC1 |             | HSP1558_CC1 | 41 | 161  |     | 318 | 55273 | 1224.89452 | 0        | 2.12E-05 |
| HSP1223_CC1 |             | HSP1559_CC1 | 39 | 147  |     | 320 | 55287 | 1205.8209  | 0        | 2.12E-05 |
| HSP1223_CC1 |             | HSP1560_CC1 | 32 | 145  |     | 327 | 55289 | 844.341402 | 0        | 2.12E-05 |
| HSP1223_CC1 |             | HSP1561_CC1 | 29 | 125  |     | 330 | 55309 | 799.036006 | 0        | 2.12E-05 |
| HSP1223_CC1 |             | HSP1564_CC1 | 11 | 80   |     | 348 | 55354 | 186.736776 | 0        | 2.12E-05 |
| HSP1223_CC1 |             | HSP249_CC1  | 64 | 742  |     | 295 | 54692 | 681.132807 | 0        | 2.12E-05 |
| HSP1223_CC1 |             | HSP250_CC1  | 67 | 811  |     | 292 | 54623 | 681.270096 | 0        | 2.12E-05 |
| HSP1223_CC1 |             | HSP251_CC1  | 70 | 850  |     | 289 | 54584 | 709.856377 | 0        | 2.12E-05 |
| HSP1223_CC1 |             | HSP252_CC1  | 70 | 858  |     | 289 | 54576 | 702.709197 | 0        | 2.12E-05 |
| HSP1223_CC1 |             | HSP253_CC1  | 71 | 852  |     | 288 | 54582 | 729.411684 | 0        | 2.12E-05 |
| HSP1223_CC1 |             | HSP254_CC1  | 70 | 843  |     | 289 | 54591 | 716.213412 | 0        | 2.12E-05 |
| HSP1223_CC1 |             | HSP255_CC1  | 68 | 823  |     | 291 | 54611 | 691.698061 | 0        | 2.12E-05 |
| HSP1223_CC1 |             | HSP256_CC1  | 66 | 801  |     | 293 | 54633 | 669.038922 | 0        | 2.12E-05 |
| HSP1223_CC1 |             | HSP257_CC1  | 63 | 771  |     | 296 | 54663 | 632.434451 | 0        | 2.12E-05 |
| HSP1223_CC1 |             | HSP258_CC1  | 59 | 733  |     | 300 | 54701 | 582.120256 | 0        | 2.12E-05 |
| HSP1222_CC1 | HSP1333_CC1 |             | 8  |      | 161 | 296 | 55328 | 54.8875863 | 1.28E-13 | 3.22E-05 |
| HSP1222_CC1 | HSP1334_CC1 |             | 9  |      | 182 | 295 | 55307 | 61.4163763 | 4.66E-15 | 3.22E-05 |
| HSP1222_CC1 | HSP1335_CC1 |             | 14 |      | 200 | 290 | 55289 | 142.579332 | 0        | 3.22E-05 |
| HSP1222_CC1 | HSP1336_CC1 |             | 14 |      | 203 | 290 | 55286 | 140.257814 | 0        | 3.22E-05 |
| HSP1222_CC1 | HSP1337_CC1 |             | 16 |      | 187 | 288 | 55302 | 202.387405 | 0        | 3.22E-05 |
| HSP1222_CC1 | HSP1338_CC1 |             | 17 |      | 178 | 287 | 55311 | 241.21557  | 0        | 3.22E-05 |
| HSP1222_CC1 | HSP1339_CC1 |             | 16 |      | 161 | 288 | 55328 | 236.442693 | 0        | 3.22E-05 |
| HSP1222_CC1 | HSP1340_CC1 |             | 12 |      | 132 | 292 | 55357 | 161.609621 | 0        | 3.22E-05 |
| HSP1222_CC1 | HSP1341_CC2 |             | 7  |      | 105 | 297 | 55384 | 67.4063112 | 2.22E-16 | 3.22E-05 |
| HSP1222_CC1 |             | HSP1386_CC1 | 20 | 1037 |     | 284 | 54452 | 36.0889274 | 1.89E-09 | 2.12E-05 |
| HSP1222_CC1 |             | HSP1552_CC1 | 19 | 74   |     | 285 | 55415 | 679.747981 | 0        | 2.12E-05 |
| HSP1222_CC1 |             | HSP1555_CC1 | 29 | 134  |     | 275 | 55355 | 897.307207 | 0        | 2.12E-05 |
| HSP1222_CC1 |             | HSP1556_CC1 | 31 | 147  |     | 273 | 55342 | 937.909898 | 0        | 2.12E-05 |
| HSP1222_CC1 |             | HSP1557_CC1 | 33 | 167  |     | 271 | 55322 | 942.90768  | 0        | 2.12E-05 |
| HSP1222_CC1 |             | HSP1558_CC1 | 34 | 168  |     | 270 | 55321 | 992.379324 | 0        | 2.12E-05 |
| HSP1222_CC1 |             | HSP1559_CC1 | 33 | 153  |     | 271 | 55336 | 1018.47593 | 0        | 2.12E-05 |
| HSP1222_CC1 |             | HSP1560_CC1 | 26 | 151  |     | 278 | 55338 | 655.542551 | 0        | 2.12E-05 |
| HSP1222_CC1 |             | HSP1561_CC1 | 23 | 131  |     | 281 | 55358 | 590.110505 | 0        | 2.12E-05 |

|             |             |             |    |      |     |       |            |            |          |          |
|-------------|-------------|-------------|----|------|-----|-------|------------|------------|----------|----------|
| HSP1222_CC1 |             | HSP1564_CC1 | 10 | 81   | 294 | 55408 | 183.474036 | 0          | 2.12E-05 |          |
| HSP1222_CC1 |             | HSP249_CC1  | 52 | 754  | 252 | 54735 | 526.537896 | 0          | 2.12E-05 |          |
| HSP1222_CC1 |             | HSP250_CC1  | 55 | 823  | 249 | 54666 | 538.465545 | 0          | 2.12E-05 |          |
| HSP1222_CC1 |             | HSP251_CC1  | 58 | 862  | 246 | 54627 | 572.603266 | 0          | 2.12E-05 |          |
| HSP1222_CC1 |             | HSP252_CC1  | 58 | 870  | 246 | 54619 | 566.816074 | 0          | 2.12E-05 |          |
| HSP1222_CC1 |             | HSP253_CC1  | 58 | 865  | 246 | 54624 | 570.421251 | 0          | 2.12E-05 |          |
| HSP1222_CC1 |             | HSP254_CC1  | 57 | 856  | 247 | 54633 | 556.16467  | 0          | 2.12E-05 |          |
| HSP1222_CC1 |             | HSP255_CC1  | 55 | 836  | 249 | 54653 | 529.238564 | 0          | 2.12E-05 |          |
| HSP1222_CC1 |             | HSP256_CC1  | 53 | 814  | 251 | 54675 | 503.875852 | 0          | 2.12E-05 |          |
| HSP1222_CC1 |             | HSP257_CC1  | 52 | 782  | 252 | 54707 | 505.86183  | 0          | 2.12E-05 |          |
| HSP1222_CC1 |             | HSP258_CC1  | 50 | 742  | 254 | 54747 | 493.290698 | 0          | 2.12E-05 |          |
| HSP1221_CC1 | HSP1333_CC1 |             | 6  |      | 163 | 264   | 55360      | 33.0959163 | 8.77E-09 | 3.22E-05 |
| HSP1221_CC1 | HSP1334_CC1 |             | 6  |      | 185 | 264   | 55338      | 28.1040519 | 1.15E-07 | 3.22E-05 |
| HSP1221_CC1 | HSP1335_CC1 |             | 10 |      | 204 | 260   | 55319      | 78.2742781 | 0        | 3.22E-05 |
| HSP1221_CC1 | HSP1336_CC1 |             | 10 |      | 207 | 260   | 55316      | 76.9464735 | 0        | 3.22E-05 |
| HSP1221_CC1 | HSP1337_CC1 |             | 12 |      | 191 | 258   | 55332      | 124.619275 | 0        | 3.22E-05 |
| HSP1221_CC1 | HSP1338_CC1 |             | 13 |      | 182 | 257   | 55341      | 155.324212 | 0        | 3.22E-05 |
| HSP1221_CC1 | HSP1339_CC1 |             | 12 |      | 165 | 258   | 55358      | 146.139652 | 0        | 3.22E-05 |
| HSP1221_CC1 | HSP1340_CC1 |             | 9  |      | 135 | 261   | 55388      | 99.6706178 | 0        | 3.22E-05 |
| HSP1221_CC1 | HSP1341_CC2 |             | 5  |      | 107 | 265   | 55416      | 36.9195889 | 1.23E-09 | 3.22E-05 |
| HSP1221_CC1 |             | HSP1386_CC1 | 19 | 1038 | 251 | 54485 | 38.6043555 | 5.19E-10   | 2.12E-05 |          |
| HSP1221_CC1 |             | HSP1552_CC1 | 18 | 75   | 252 | 55448 | 688.835876 | 0          | 2.12E-05 |          |
| HSP1221_CC1 |             | HSP1555_CC1 | 28 | 135  | 242 | 55388 | 946.021275 | 0          | 2.12E-05 |          |
| HSP1221_CC1 |             | HSP1556_CC1 | 30 | 148  | 240 | 55375 | 993.637383 | 0          | 2.12E-05 |          |
| HSP1221_CC1 |             | HSP1557_CC1 | 32 | 168  | 238 | 55355 | 1003.40372 | 0          | 2.12E-05 |          |
| HSP1221_CC1 |             | HSP1558_CC1 | 33 | 169  | 237 | 55354 | 1057.92755 | 0          | 2.12E-05 |          |
| HSP1221_CC1 |             | HSP1559_CC1 | 32 | 154  | 238 | 55369 | 1083.37216 | 0          | 2.12E-05 |          |
| HSP1221_CC1 |             | HSP1560_CC1 | 25 | 152  | 245 | 55371 | 686.005772 | 0          | 2.12E-05 |          |
| HSP1221_CC1 |             | HSP1561_CC1 | 22 | 132  | 248 | 55391 | 610.821373 | 0          | 2.12E-05 |          |
| HSP1221_CC1 |             | HSP1564_CC1 | 9  | 82   | 261 | 55441 | 167.455518 | 0          | 2.12E-05 |          |
| HSP1221_CC1 |             | HSP249_CC1  | 46 | 760  | 224 | 54763 | 463.299128 | 0          | 2.12E-05 |          |
| HSP1221_CC1 |             | HSP250_CC1  | 49 | 829  | 221 | 54694 | 481.198196 | 0          | 2.12E-05 |          |
| HSP1221_CC1 |             | HSP251_CC1  | 52 | 868  | 218 | 54655 | 518.820705 | 0          | 2.12E-05 |          |
| HSP1221_CC1 |             | HSP252_CC1  | 52 | 876  | 218 | 54647 | 513.585742 | 0          | 2.12E-05 |          |
| HSP1221_CC1 |             | HSP253_CC1  | 52 | 871  | 218 | 54652 | 516.846905 | 0          | 2.12E-05 |          |
| HSP1221_CC1 |             | HSP254_CC1  | 51 | 862  | 219 | 54661 | 501.704866 | 0          | 2.12E-05 |          |
| HSP1221_CC1 |             | HSP255_CC1  | 49 | 842  | 221 | 54681 | 472.957048 | 0          | 2.12E-05 |          |
| HSP1221_CC1 |             | HSP256_CC1  | 47 | 820  | 223 | 54703 | 445.738794 | 0          | 2.12E-05 |          |
| HSP1221_CC1 |             | HSP257_CC1  | 46 | 788  | 224 | 54735 | 445.093797 | 0          | 2.12E-05 |          |
| HSP1221_CC1 |             | HSP258_CC1  | 45 | 747  | 225 | 54776 | 450.72395  | 0          | 2.12E-05 |          |
| HSP1220_CC1 | HSP1335_CC1 |             | 6  |      | 208 | 190   | 55389      | 36.9089302 | 1.24E-09 | 3.22E-05 |
| HSP1220_CC1 | HSP1336_CC1 |             | 6  |      | 211 | 190   | 55386      | 36.2545878 | 1.73E-09 | 3.22E-05 |
| HSP1220_CC1 | HSP1337_CC1 |             | 7  |      | 196 | 189   | 55401      | 55.8222227 | 7.94E-14 | 3.22E-05 |
| HSP1220_CC1 | HSP1338_CC1 |             | 8  |      | 187 | 188   | 55410      | 78.6615996 | 0        | 3.22E-05 |
| HSP1220_CC1 | HSP1339_CC1 |             | 7  |      | 170 | 189   | 55427      | 65.8650728 | 4.44E-16 | 3.22E-05 |
| HSP1220_CC1 | HSP1340_CC1 |             | 6  |      | 138 | 190   | 55459      | 60.0357213 | 9.33E-15 | 3.22E-05 |
| HSP1220_CC1 |             | HSP1386_CC1 | 13 | 1044 | 183 | 54553 | 23.7581956 | 1.09E-06   | 2.12E-05 |          |
| HSP1220_CC1 |             | HSP1552_CC1 | 12 | 81   | 184 | 55516 | 419.256973 | 0          | 2.12E-05 |          |

|             |             |             |    |      |     |       |            |          |          |
|-------------|-------------|-------------|----|------|-----|-------|------------|----------|----------|
| HSP1220_CC1 |             | HSP1555_CC1 | 22 | 141  | 174 | 55456 | 806.999617 | 0        | 2.12E-05 |
| HSP1220_CC1 |             | HSP1556_CC1 | 24 | 154  | 172 | 55443 | 879.653098 | 0        | 2.12E-05 |
| HSP1220_CC1 |             | HSP1557_CC1 | 25 | 175  | 171 | 55422 | 846.255136 | 0        | 2.12E-05 |
| HSP1220_CC1 |             | HSP1558_CC1 | 25 | 177  | 171 | 55420 | 837.421999 | 0        | 2.12E-05 |
| HSP1220_CC1 |             | HSP1559_CC1 | 24 | 162  | 172 | 55435 | 839.916319 | 0        | 2.12E-05 |
| HSP1220_CC1 |             | HSP1560_CC1 | 19 | 158  | 177 | 55439 | 546.845594 | 0        | 2.12E-05 |
| HSP1220_CC1 |             | HSP1561_CC1 | 17 | 137  | 179 | 55460 | 503.893295 | 0        | 2.12E-05 |
| HSP1220_CC1 |             | HSP1564_CC1 | 7  | 84   | 189 | 55513 | 140.318149 | 0        | 2.12E-05 |
| HSP1220_CC1 |             | HSP249_CC1  | 33 | 773  | 163 | 54824 | 327.29928  | 0        | 2.12E-05 |
| HSP1220_CC1 |             | HSP250_CC1  | 36 | 842  | 160 | 54755 | 358.137443 | 0        | 2.12E-05 |
| HSP1220_CC1 |             | HSP251_CC1  | 38 | 882  | 158 | 54715 | 381.633009 | 0        | 2.12E-05 |
| HSP1220_CC1 |             | HSP252_CC1  | 39 | 889  | 157 | 54708 | 399.849191 | 0        | 2.12E-05 |
| HSP1220_CC1 |             | HSP253_CC1  | 38 | 885  | 158 | 54712 | 380.182808 | 0        | 2.12E-05 |
| HSP1220_CC1 |             | HSP254_CC1  | 37 | 876  | 159 | 54721 | 363.237924 | 0        | 2.12E-05 |
| HSP1220_CC1 |             | HSP255_CC1  | 36 | 855  | 160 | 54742 | 352.016808 | 0        | 2.12E-05 |
| HSP1220_CC1 |             | HSP256_CC1  | 34 | 833  | 162 | 54764 | 320.682292 | 0        | 2.12E-05 |
| HSP1220_CC1 |             | HSP257_CC1  | 33 | 801  | 163 | 54796 | 314.411636 | 0        | 2.12E-05 |
| HSP1220_CC1 |             | HSP258_CC1  | 32 | 760  | 164 | 54837 | 312.340612 | 0        | 2.12E-05 |
| HSP1219_CC1 | HSP1338_CC1 |             | 5  |      | 190 | 55479 | 48.3947823 | 3.49E-12 | 3.22E-05 |
| HSP1219_CC1 |             | HSP1386_CC1 | 9  | 1048 | 115 | 54621 | 19.2356078 | 1.16E-05 | 2.12E-05 |
| HSP1219_CC1 |             | HSP1552_CC1 | 9  | 84   | 115 | 55585 | 375.552282 | 0        | 2.12E-05 |
| HSP1219_CC1 |             | HSP1555_CC1 | 15 | 148  | 109 | 55521 | 594.504266 | 0        | 2.12E-05 |
| HSP1219_CC1 |             | HSP1556_CC1 | 18 | 160  | 106 | 55509 | 787.651843 | 0        | 2.12E-05 |
| HSP1219_CC1 |             | HSP1557_CC1 | 18 | 182  | 106 | 55487 | 697.397405 | 0        | 2.12E-05 |
| HSP1219_CC1 |             | HSP1558_CC1 | 18 | 184  | 106 | 55485 | 690.167692 | 0        | 2.12E-05 |
| HSP1219_CC1 |             | HSP1559_CC1 | 19 | 167  | 105 | 55502 | 840.353909 | 0        | 2.12E-05 |
| HSP1219_CC1 |             | HSP1560_CC1 | 16 | 161  | 108 | 55508 | 622.513226 | 0        | 2.12E-05 |
| HSP1219_CC1 |             | HSP1561_CC1 | 14 | 140  | 110 | 55529 | 547.723474 | 0        | 2.12E-05 |
| HSP1219_CC1 |             | HSP1564_CC1 | 5  | 86   | 119 | 55583 | 114.252976 | 0        | 2.12E-05 |
| HSP1219_CC1 |             | HSP249_CC1  | 19 | 787  | 105 | 54882 | 168.11377  | 0        | 2.12E-05 |
| HSP1219_CC1 |             | HSP250_CC1  | 22 | 856  | 102 | 54813 | 209.743517 | 0        | 2.12E-05 |
| HSP1219_CC1 |             | HSP251_CC1  | 24 | 896  | 100 | 54773 | 240.234966 | 0        | 2.12E-05 |
| HSP1219_CC1 |             | HSP252_CC1  | 25 | 903  | 99  | 54766 | 259.988155 | 0        | 2.12E-05 |
| HSP1219_CC1 |             | HSP253_CC1  | 24 | 899  | 100 | 54770 | 239.321806 | 0        | 2.12E-05 |
| HSP1219_CC1 |             | HSP254_CC1  | 24 | 889  | 100 | 54780 | 242.389127 | 0        | 2.12E-05 |
| HSP1219_CC1 |             | HSP255_CC1  | 23 | 868  | 101 | 54801 | 227.244471 | 0        | 2.12E-05 |
| HSP1219_CC1 |             | HSP256_CC1  | 21 | 846  | 103 | 54823 | 192.198129 | 0        | 2.12E-05 |
| HSP1219_CC1 |             | HSP257_CC1  | 20 | 814  | 104 | 54855 | 180.751437 | 0        | 2.12E-05 |
| HSP1219_CC1 |             | HSP258_CC1  | 18 | 774  | 106 | 54895 | 152.324061 | 0        | 2.12E-05 |
| HSP1218_CC1 |             | HSP1552_CC1 | 6  | 87   | 48  | 55652 | 389.064287 | 0        | 2.12E-05 |
| HSP1218_CC1 |             | HSP1555_CC1 | 8  | 155  | 46  | 55584 | 391.353852 | 0        | 2.12E-05 |
| HSP1218_CC1 |             | HSP1556_CC1 | 10 | 168  | 44  | 55571 | 562.962989 | 0        | 2.12E-05 |
| HSP1218_CC1 |             | HSP1557_CC1 | 9  | 191  | 45  | 55548 | 402.471947 | 0        | 2.12E-05 |
| HSP1218_CC1 |             | HSP1558_CC1 | 10 | 192  | 44  | 55547 | 493.947181 | 0        | 2.12E-05 |
| HSP1218_CC1 |             | HSP1559_CC1 | 10 | 176  | 44  | 55563 | 537.978325 | 0        | 2.12E-05 |
| HSP1218_CC1 |             | HSP1560_CC1 | 9  | 168  | 45  | 55571 | 456.88358  | 0        | 2.12E-05 |
| HSP1218_CC1 |             | HSP1561_CC1 | 7  | 147  | 47  | 55592 | 316.073181 | 0        | 2.12E-05 |
| HSP1218_CC1 |             | HSP249_CC1  | 8  | 798  | 46  | 54941 | 67.8662361 | 2.22E-16 | 2.12E-05 |

|             |             |    |     |     |       |            |          |          |
|-------------|-------------|----|-----|-----|-------|------------|----------|----------|
| HSP1218_CC1 | HSP250_CC1  | 10 | 868 | 44  | 54871 | 100.199002 | 0        | 2.12E-05 |
| HSP1218_CC1 | HSP251_CC1  | 12 | 908 | 42  | 54831 | 141.069732 | 0        | 2.12E-05 |
| HSP1218_CC1 | HSP252_CC1  | 12 | 916 | 42  | 54823 | 139.679102 | 0        | 2.12E-05 |
| HSP1218_CC1 | HSP253_CC1  | 11 | 912 | 43  | 54827 | 116.376433 | 0        | 2.12E-05 |
| HSP1218_CC1 | HSP254_CC1  | 11 | 902 | 43  | 54837 | 117.855059 | 0        | 2.12E-05 |
| HSP1218_CC1 | HSP255_CC1  | 11 | 880 | 43  | 54859 | 121.225375 | 0        | 2.12E-05 |
| HSP1218_CC1 | HSP256_CC1  | 11 | 856 | 43  | 54883 | 125.097977 | 0        | 2.12E-05 |
| HSP1218_CC1 | HSP257_CC1  | 10 | 824 | 44  | 54915 | 106.384203 | 0        | 2.12E-05 |
| HSP1218_CC1 | HSP258_CC1  | 8  | 784 | 46  | 54955 | 69.3077304 | 1.11E-16 | 2.12E-05 |
| HSP1088_CC1 | HSP1015_CC1 | 5  | 75  | 82  | 55631 | 191.102219 | 0        | 3.33E-05 |
| HSP1089_CC1 | HSP1015_CC1 | 5  | 75  | 102 | 55611 | 153.614714 | 0        | 3.33E-05 |
| HSP1088_CC1 | HSP1016_CC1 | 5  | 93  | 82  | 55613 | 154.260539 | 0        | 3.33E-05 |
| HSP1089_CC1 | HSP1016_CC1 | 5  | 93  | 102 | 55593 | 123.659724 | 0        | 3.33E-05 |
| HSP1091_CC1 | HSP1016_CC1 | 5  | 93  | 146 | 55549 | 84.9014054 | 0        | 3.33E-05 |
| HSP1095_CC2 | HSP1016_CC1 | 5  | 93  | 114 | 55581 | 110.241651 | 0        | 3.33E-05 |
| HSP1088_CC1 | HSP1017_CC1 | 5  | 111 | 82  | 55595 | 128.860276 | 0        | 3.33E-05 |
| HSP1089_CC1 | HSP1017_CC1 | 5  | 111 | 102 | 55575 | 103.010916 | 0        | 3.33E-05 |
| HSP1091_CC1 | HSP1017_CC1 | 5  | 111 | 146 | 55531 | 70.2813653 | 0        | 3.33E-05 |
| HSP1095_CC2 | HSP1017_CC1 | 5  | 111 | 114 | 55563 | 91.6781431 | 0        | 3.33E-05 |
| HSP1088_CC1 | HSP1018_CC1 | 7  | 118 | 80  | 55588 | 238.489436 | 0        | 3.33E-05 |
| HSP1089_CC1 | HSP1018_CC1 | 7  | 118 | 100 | 55568 | 191.435458 | 0        | 3.33E-05 |
| HSP1090_CC1 | HSP1018_CC1 | 6  | 119 | 126 | 55542 | 110.534488 | 0        | 3.33E-05 |
| HSP1091_CC1 | HSP1018_CC1 | 8  | 117 | 143 | 55525 | 174.378788 | 0        | 3.33E-05 |
| HSP1092_CC1 | HSP1018_CC1 | 7  | 118 | 139 | 55529 | 136.791111 | 0        | 3.33E-05 |
| HSP1093_CC1 | HSP1018_CC1 | 7  | 118 | 127 | 55541 | 150.21206  | 0        | 3.33E-05 |
| HSP1094_CC2 | HSP1018_CC1 | 7  | 118 | 136 | 55532 | 139.934799 | 0        | 3.33E-05 |
| HSP1095_CC2 | HSP1018_CC1 | 8  | 117 | 111 | 55557 | 225.301401 | 0        | 3.33E-05 |
| HSP1087_CC1 | HSP1019_CC1 | 5  | 121 | 52  | 55615 | 184.946142 | 0        | 3.33E-05 |
| HSP1088_CC1 | HSP1019_CC1 | 8  | 118 | 79  | 55588 | 311.122246 | 0        | 3.33E-05 |
| HSP1089_CC1 | HSP1019_CC1 | 8  | 118 | 99  | 55568 | 250.138462 | 0        | 3.33E-05 |
| HSP1090_CC1 | HSP1019_CC1 | 8  | 118 | 124 | 55543 | 199.913158 | 0        | 3.33E-05 |
| HSP1091_CC1 | HSP1019_CC1 | 10 | 116 | 141 | 55526 | 274.950483 | 0        | 3.33E-05 |
| HSP1092_CC1 | HSP1019_CC1 | 9  | 117 | 137 | 55530 | 229.109204 | 0        | 3.33E-05 |
| HSP1093_CC1 | HSP1019_CC1 | 9  | 117 | 125 | 55542 | 251.135213 | 0        | 3.33E-05 |
| HSP1094_CC2 | HSP1019_CC1 | 9  | 117 | 134 | 55533 | 234.268772 | 0        | 3.33E-05 |
| HSP1095_CC2 | HSP1019_CC1 | 10 | 116 | 109 | 55558 | 353.923372 | 0        | 3.33E-05 |
| HSP1096_CC2 | HSP1019_CC1 | 6  | 120 | 64  | 55603 | 216.645072 | 0        | 3.33E-05 |
| HSP1087_CC1 | HSP1020_CC1 | 5  | 114 | 52  | 55622 | 196.37603  | 0        | 3.33E-05 |
| HSP1088_CC1 | HSP1020_CC1 | 8  | 111 | 79  | 55595 | 330.30424  | 0        | 3.33E-05 |
| HSP1089_CC1 | HSP1020_CC1 | 8  | 111 | 99  | 55575 | 265.736438 | 0        | 3.33E-05 |
| HSP1090_CC1 | HSP1020_CC1 | 8  | 111 | 124 | 55550 | 212.557316 | 0        | 3.33E-05 |
| HSP1091_CC1 | HSP1020_CC1 | 10 | 109 | 141 | 55533 | 292.230428 | 0        | 3.33E-05 |
| HSP1092_CC1 | HSP1020_CC1 | 9  | 110 | 137 | 55537 | 243.581693 | 0        | 3.33E-05 |
| HSP1093_CC1 | HSP1020_CC1 | 9  | 110 | 125 | 55549 | 266.90331  | 0        | 3.33E-05 |
| HSP1094_CC2 | HSP1020_CC1 | 9  | 110 | 134 | 55540 | 249.044801 | 0        | 3.33E-05 |
| HSP1095_CC2 | HSP1020_CC1 | 9  | 110 | 110 | 55564 | 302.675917 | 0        | 3.33E-05 |
| HSP1096_CC2 | HSP1020_CC1 | 5  | 114 | 65  | 55609 | 158.130528 | 0        | 3.33E-05 |
| HSP1087_CC1 | HSP1021_CC2 | 5  | 102 | 52  | 55634 | 219.451275 | 0        | 3.33E-05 |

|             |             |    |      |     |       |            |          |          |
|-------------|-------------|----|------|-----|-------|------------|----------|----------|
| HSP1088_CC1 | HSP1021_CC2 | 7  | 100  | 80  | 55606 | 280.821377 | 0        | 3.33E-05 |
| HSP1089_CC1 | HSP1021_CC2 | 7  | 100  | 100 | 55586 | 225.856328 | 0        | 3.33E-05 |
| HSP1090_CC1 | HSP1021_CC2 | 6  | 101  | 126 | 55560 | 131.02197  | 0        | 3.33E-05 |
| HSP1091_CC1 | HSP1021_CC2 | 8  | 99   | 143 | 55543 | 206.24565  | 0        | 3.33E-05 |
| HSP1092_CC1 | HSP1021_CC2 | 7  | 100  | 139 | 55547 | 162.014307 | 0        | 3.33E-05 |
| HSP1093_CC1 | HSP1021_CC2 | 7  | 100  | 127 | 55559 | 177.695861 | 0        | 3.33E-05 |
| HSP1094_CC2 | HSP1021_CC2 | 7  | 100  | 136 | 55550 | 165.687639 | 0        | 3.33E-05 |
| HSP1095_CC2 | HSP1021_CC2 | 8  | 99   | 111 | 55575 | 265.736438 | 0        | 3.33E-05 |
| HSP1087_CC1 | HSP1023_CC2 | 5  | 70   | 52  | 55666 | 317.101267 | 0        | 3.33E-05 |
| HSP1088_CC1 | HSP1023_CC2 | 7  | 68   | 80  | 55638 | 406.277678 | 0        | 3.33E-05 |
| HSP1089_CC1 | HSP1023_CC2 | 7  | 68   | 100 | 55618 | 327.880093 | 0        | 3.33E-05 |
| HSP1090_CC1 | HSP1023_CC2 | 6  | 69   | 126 | 55592 | 191.771969 | 0        | 3.33E-05 |
| HSP1091_CC1 | HSP1023_CC2 | 7  | 68   | 144 | 55574 | 228.528023 | 0        | 3.33E-05 |
| HSP1092_CC1 | HSP1023_CC2 | 6  | 69   | 140 | 55578 | 172.307217 | 0        | 3.33E-05 |
| HSP1093_CC1 | HSP1023_CC2 | 6  | 69   | 128 | 55590 | 188.742069 | 0        | 3.33E-05 |
| HSP1094_CC2 | HSP1023_CC2 | 6  | 69   | 137 | 55581 | 176.157123 | 0        | 3.33E-05 |
| HSP1095_CC2 | HSP1023_CC2 | 7  | 68   | 112 | 55606 | 293.494155 | 0        | 3.33E-05 |
| HSP1654_CC2 | HSP1063_CC2 | 5  | 99   | 19  | 55670 | 550.130521 | 0        | 3.33E-05 |
| HSP1655_CC2 | HSP1063_CC2 | 5  | 99   | 19  | 55670 | 550.130521 | 0        | 3.33E-05 |
| HSP1654_CC2 | HSP1064_CC2 | 5  | 106  | 19  | 55663 | 514.876089 | 0        | 3.33E-05 |
| HSP1655_CC2 | HSP1064_CC2 | 5  | 106  | 19  | 55663 | 514.876089 | 0        | 3.33E-05 |
| HSP1654_CC2 | HSP1065_CC2 | 5  | 106  | 19  | 55663 | 514.876089 | 0        | 3.33E-05 |
| HSP1655_CC2 | HSP1065_CC2 | 5  | 106  | 19  | 55663 | 514.876089 | 0        | 3.33E-05 |
| HSP1654_CC2 | HSP1066_CC2 | 5  | 100  | 19  | 55669 | 544.806367 | 0        | 3.33E-05 |
| HSP1655_CC2 | HSP1066_CC2 | 5  | 100  | 19  | 55669 | 544.806367 | 0        | 3.33E-05 |
| HSP1088_CC1 | HSP1096_CC1 | 23 | 5764 | 65  | 49941 | 23.5608041 | 1.21E-06 | 3.33E-05 |
| HSP1088_CC2 | HSP1096_CC1 | 19 | 5768 | 30  | 49976 | 42.5595768 | 6.86E-11 | 3.33E-05 |
| HSP1089_CC1 | HSP1096_CC1 | 29 | 5758 | 79  | 49927 | 31.6112382 | 1.88E-08 | 3.33E-05 |
| HSP1089_CC2 | HSP1096_CC1 | 31 | 5756 | 42  | 49964 | 80.9858306 | 0        | 3.33E-05 |
| HSP1090_CC1 | HSP1096_CC1 | 34 | 5753 | 99  | 49907 | 33.0964453 | 8.77E-09 | 3.33E-05 |
| HSP1090_CC2 | HSP1096_CC1 | 49 | 5738 | 52  | 49954 | 158.347894 | 0        | 3.33E-05 |
| HSP1091_CC1 | HSP1096_CC1 | 43 | 5744 | 109 | 49897 | 52.6323448 | 4.02E-13 | 3.33E-05 |
| HSP1091_CC2 | HSP1096_CC1 | 69 | 5718 | 64  | 49942 | 247.072084 | 0        | 3.33E-05 |
| HSP1092_CC1 | HSP1096_CC1 | 40 | 5747 | 107 | 49899 | 44.9531039 | 2.02E-11 | 3.33E-05 |
| HSP1092_CC2 | HSP1096_CC1 | 81 | 5706 | 75  | 49931 | 290.524916 | 0        | 3.33E-05 |
| HSP1093_CC1 | HSP1096_CC1 | 39 | 5748 | 95  | 49911 | 50.7003453 | 1.08E-12 | 3.33E-05 |
| HSP1093_CC2 | HSP1096_CC1 | 82 | 5705 | 77  | 49929 | 291.149494 | 0        | 3.33E-05 |
| HSP1094_CC1 | HSP1096_CC1 | 70 | 5717 | 58  | 49948 | 271.017501 | 0        | 3.33E-05 |
| HSP1094_CC2 | HSP1096_CC1 | 46 | 5741 | 97  | 49909 | 73.2606227 | 0        | 3.33E-05 |
| HSP1095_CC1 | HSP1096_CC1 | 39 | 5748 | 39  | 49967 | 131.942414 | 0        | 3.33E-05 |
| HSP1095_CC2 | HSP1096_CC1 | 36 | 5751 | 83  | 49923 | 50.6971442 | 1.08E-12 | 3.33E-05 |
| HSP1096_CC1 | HSP1096_CC1 | 16 | 5771 | 25  | 49981 | 36.2326844 | 1.75E-09 | 3.33E-05 |
| HSP1096_CC2 | HSP1096_CC1 | 19 | 5768 | 51  | 49955 | 21.2042875 | 4.13E-06 | 3.33E-05 |
| HSP1401_CC3 | HSP1096_CC1 | 8  | 5779 | 13  | 49993 | 17.3678518 | 3.08E-05 | 3.33E-05 |
| HSP1402_CC3 | HSP1096_CC1 | 8  | 5779 | 12  | 49994 | 18.8914947 | 1.38E-05 | 3.33E-05 |
| HSP1403_CC2 | HSP1096_CC1 | 9  | 5778 | 11  | 49995 | 25.8058166 | 3.78E-07 | 3.33E-05 |
| HSP1654_CC1 | HSP1096_CC1 | 37 | 5750 | 45  | 49961 | 106.668974 | 0        | 3.33E-05 |
| HSP1654_CC2 | HSP1096_CC1 | 14 | 5773 | 10  | 49996 | 59.4100002 | 1.28E-14 | 3.33E-05 |

|             |             |    |      |     |       |            |          |          |
|-------------|-------------|----|------|-----|-------|------------|----------|----------|
| HSP1655_CC1 | HSP1096_CC1 | 47 | 5740 | 47  | 49959 | 159.053201 | 0        | 3.33E-05 |
| HSP1655_CC2 | HSP1096_CC1 | 13 | 5774 | 11  | 49995 | 49.5357844 | 1.95E-12 | 3.33E-05 |
| HSP1656_CC1 | HSP1096_CC1 | 45 | 5742 | 51  | 49955 | 137.833153 | 0        | 3.33E-05 |
| HSP1656_CC2 | HSP1096_CC1 | 12 | 5775 | 10  | 49996 | 46.1950278 | 1.07E-11 | 3.33E-05 |
| HSP1657_CC1 | HSP1096_CC1 | 49 | 5738 | 50  | 49956 | 163.285468 | 0        | 3.33E-05 |
| HSP1657_CC2 | HSP1096_CC1 | 11 | 5776 | 10  | 49996 | 39.8790461 | 2.70E-10 | 3.33E-05 |
| HSP1658_CC1 | HSP1096_CC1 | 51 | 5736 | 49  | 49957 | 177.872197 | 0        | 3.33E-05 |
| HSP1658_CC2 | HSP1096_CC1 | 9  | 5778 | 11  | 49995 | 25.8058166 | 3.78E-07 | 3.33E-05 |
| HSP1659_CC1 | HSP1096_CC1 | 46 | 5741 | 52  | 49954 | 141.201839 | 0        | 3.33E-05 |
| HSP1659_CC2 | HSP1096_CC1 | 7  | 5780 | 10  | 49996 | 17.3574137 | 3.10E-05 | 3.33E-05 |
| HSP1660_CC1 | HSP1096_CC1 | 45 | 5742 | 52  | 49954 | 135.608289 | 0        | 3.33E-05 |
| HSP1664_CC1 | HSP1096_CC1 | 32 | 5755 | 30  | 49976 | 113.555734 | 0        | 3.33E-05 |
| HSP1333_CC1 | HSP1386_CC1 | 18 | 1039 | 151 | 54585 | 69.9302775 | 1.11E-16 | 3.33E-05 |
| HSP1334_CC1 | HSP1386_CC1 | 20 | 1037 | 171 | 54565 | 75.8533249 | 0        | 3.33E-05 |
| HSP1335_CC1 | HSP1386_CC1 | 22 | 1035 | 192 | 54544 | 81.281272  | 0        | 3.33E-05 |
| HSP1336_CC1 | HSP1386_CC1 | 22 | 1035 | 195 | 54541 | 79.6549457 | 0        | 3.33E-05 |
| HSP1337_CC1 | HSP1386_CC1 | 22 | 1035 | 181 | 54555 | 87.6699304 | 0        | 3.33E-05 |
| HSP1338_CC1 | HSP1386_CC1 | 22 | 1035 | 173 | 54563 | 92.7835356 | 0        | 3.33E-05 |
| HSP1339_CC1 | HSP1386_CC1 | 21 | 1036 | 156 | 54580 | 94.9612794 | 0        | 3.33E-05 |
| HSP1340_CC1 | HSP1386_CC1 | 18 | 1039 | 126 | 54610 | 87.3691852 | 0        | 3.33E-05 |
| HSP1341_CC2 | HSP1386_CC1 | 15 | 1042 | 97  | 54639 | 79.8313482 | 0        | 3.33E-05 |
| HSP1589_CC1 | HSP1386_CC1 | 13 | 1044 | 69  | 54667 | 86.0958654 | 0        | 3.33E-05 |
| HSP1590_CC1 | HSP1386_CC1 | 18 | 1039 | 81  | 54655 | 141.552287 | 0        | 3.33E-05 |
| HSP1591_CC1 | HSP1386_CC1 | 20 | 1037 | 84  | 54652 | 168.486907 | 0        | 3.33E-05 |
| HSP1592_CC1 | HSP1386_CC1 | 23 | 1034 | 91  | 54645 | 205.400438 | 0        | 3.33E-05 |
| HSP1593_CC1 | HSP1386_CC1 | 25 | 1032 | 87  | 54649 | 251.946374 | 0        | 3.33E-05 |
| HSP1594_CC1 | HSP1386_CC1 | 24 | 1033 | 85  | 54651 | 237.962833 | 0        | 3.33E-05 |
| HSP1595_CC1 | HSP1386_CC1 | 8  | 1049 | 27  | 54709 | 82.802587  | 0        | 3.33E-05 |
| HSP836_CC1  | HSP1386_CC1 | 5  | 1052 | 18  | 54718 | 48.7533198 | 2.90E-12 | 3.33E-05 |
| HSP1088_CC1 | HSP1386_CC2 | 5  | 208  | 82  | 55498 | 65.9562117 | 4.44E-16 | 3.33E-05 |
| HSP1089_CC1 | HSP1386_CC2 | 5  | 208  | 102 | 55478 | 51.9065144 | 5.82E-13 | 3.33E-05 |
| HSP1090_CC1 | HSP1386_CC2 | 6  | 207  | 126 | 55454 | 60.314247  | 8.10E-15 | 3.33E-05 |
| HSP1091_CC1 | HSP1386_CC2 | 7  | 206  | 144 | 55436 | 72.0458233 | 0        | 3.33E-05 |
| HSP1092_CC1 | HSP1386_CC2 | 7  | 206  | 139 | 55441 | 74.9499214 | 0        | 3.33E-05 |
| HSP1093_CC1 | HSP1386_CC2 | 6  | 207  | 128 | 55452 | 59.2511971 | 1.39E-14 | 3.33E-05 |
| HSP1094_CC2 | HSP1386_CC2 | 6  | 207  | 137 | 55443 | 54.8379754 | 1.31E-13 | 3.33E-05 |
| HSP834_CC1  | HSP1395_CC1 | 5  | 921  | 11  | 54856 | 85.8579115 | 0        | 3.33E-05 |
| HSP835_CC1  | HSP1395_CC1 | 6  | 920  | 10  | 54857 | 125.957749 | 0        | 3.33E-05 |
| HSP836_CC1  | HSP1395_CC1 | 7  | 919  | 16  | 54851 | 116.728552 | 0        | 3.33E-05 |
| HSP834_CC1  | HSP1396_CC1 | 5  | 875  | 11  | 54902 | 90.7739989 | 0        | 3.33E-05 |
| HSP835_CC1  | HSP1396_CC1 | 6  | 874  | 10  | 54903 | 133.040868 | 0        | 3.33E-05 |
| HSP836_CC1  | HSP1396_CC1 | 6  | 874  | 17  | 54896 | 89.0398463 | 0        | 3.33E-05 |
| HSP834_CC1  | HSP1397_CC1 | 5  | 834  | 11  | 54943 | 95.6106966 | 0        | 3.33E-05 |
| HSP835_CC1  | HSP1397_CC1 | 6  | 833  | 10  | 54944 | 140.009231 | 0        | 3.33E-05 |
| HSP836_CC1  | HSP1397_CC1 | 6  | 833  | 17  | 54937 | 93.8817799 | 0        | 3.33E-05 |
| HSP834_CC1  | HSP1398_CC1 | 5  | 762  | 11  | 55015 | 105.357269 | 0        | 3.33E-05 |
| HSP835_CC1  | HSP1398_CC1 | 6  | 761  | 10  | 55016 | 154.050461 | 0        | 3.33E-05 |
| HSP836_CC1  | HSP1398_CC1 | 6  | 761  | 17  | 55009 | 103.639897 | 0        | 3.33E-05 |

|             |             |    |     |     |       |            |          |          |
|-------------|-------------|----|-----|-----|-------|------------|----------|----------|
| HSP835_CC1  | HSP1399_CC1 | 5  | 673 | 11  | 55104 | 120.269021 | 0        | 3.33E-05 |
| HSP836_CC1  | HSP1399_CC1 | 5  | 673 | 18  | 55097 | 80.7397933 | 0        | 3.33E-05 |
| HSP1333_CC1 | HSP249_CC1  | 10 | 796 | 159 | 54828 | 23.8163872 | 1.06E-06 | 3.33E-05 |
| HSP1334_CC1 | HSP249_CC1  | 14 | 792 | 177 | 54810 | 46.6242682 | 8.60E-12 | 3.33E-05 |
| HSP1335_CC1 | HSP249_CC1  | 18 | 788 | 196 | 54791 | 73.2297471 | 0        | 3.33E-05 |
| HSP1336_CC1 | HSP249_CC1  | 20 | 786 | 197 | 54790 | 92.4225836 | 0        | 3.33E-05 |
| HSP1337_CC1 | HSP249_CC1  | 21 | 785 | 182 | 54805 | 113.355646 | 0        | 3.33E-05 |
| HSP1338_CC1 | HSP249_CC1  | 21 | 785 | 174 | 54813 | 119.503442 | 0        | 3.33E-05 |
| HSP1339_CC1 | HSP249_CC1  | 20 | 786 | 157 | 54830 | 121.119493 | 0        | 3.33E-05 |
| HSP1340_CC1 | HSP249_CC1  | 17 | 789 | 127 | 54860 | 108.854571 | 0        | 3.33E-05 |
| HSP1341_CC2 | HSP249_CC1  | 14 | 792 | 98  | 54889 | 96.3389648 | 0        | 3.33E-05 |
| HSP1333_CC1 | HSP250_CC1  | 12 | 866 | 157 | 54758 | 33.430595  | 7.39E-09 | 3.33E-05 |
| HSP1334_CC1 | HSP250_CC1  | 16 | 862 | 175 | 54740 | 57.2709599 | 3.80E-14 | 3.33E-05 |
| HSP1335_CC1 | HSP250_CC1  | 20 | 858 | 194 | 54721 | 83.7791035 | 0        | 3.33E-05 |
| HSP1336_CC1 | HSP250_CC1  | 22 | 856 | 195 | 54720 | 103.166261 | 0        | 3.33E-05 |
| HSP1337_CC1 | HSP250_CC1  | 23 | 855 | 180 | 54735 | 125.207396 | 0        | 3.33E-05 |
| HSP1338_CC1 | HSP250_CC1  | 23 | 855 | 172 | 54743 | 131.987455 | 0        | 3.33E-05 |
| HSP1339_CC1 | HSP250_CC1  | 22 | 856 | 155 | 54760 | 135.096213 | 0        | 3.33E-05 |
| HSP1340_CC1 | HSP250_CC1  | 19 | 859 | 125 | 54790 | 125.871846 | 0        | 3.33E-05 |
| HSP1341_CC2 | HSP250_CC1  | 15 | 863 | 97  | 54818 | 101.213758 | 0        | 3.33E-05 |
| HSP1589_CC1 | HSP250_CC1  | 8  | 870 | 74  | 54841 | 35.4969009 | 2.55E-09 | 3.33E-05 |
| HSP1590_CC1 | HSP250_CC1  | 7  | 871 | 92  | 54823 | 19.3480457 | 1.09E-05 | 3.33E-05 |
| HSP1333_CC1 | HSP251_CC1  | 12 | 908 | 157 | 54716 | 31.0649982 | 2.50E-08 | 3.33E-05 |
| HSP1334_CC1 | HSP251_CC1  | 16 | 904 | 175 | 54698 | 53.4944771 | 2.59E-13 | 3.33E-05 |
| HSP1335_CC1 | HSP251_CC1  | 20 | 900 | 194 | 54679 | 78.4730983 | 0        | 3.33E-05 |
| HSP1336_CC1 | HSP251_CC1  | 22 | 898 | 195 | 54678 | 96.8073785 | 0        | 3.33E-05 |
| HSP1337_CC1 | HSP251_CC1  | 23 | 897 | 180 | 54693 | 117.744629 | 0        | 3.33E-05 |
| HSP1338_CC1 | HSP251_CC1  | 23 | 897 | 172 | 54701 | 124.208372 | 0        | 3.33E-05 |
| HSP1339_CC1 | HSP251_CC1  | 23 | 897 | 154 | 54719 | 140.930694 | 0        | 3.33E-05 |
| HSP1340_CC1 | HSP251_CC1  | 20 | 900 | 124 | 54749 | 133.36936  | 0        | 3.33E-05 |
| HSP1341_CC2 | HSP251_CC1  | 16 | 904 | 96  | 54777 | 110.503291 | 0        | 3.33E-05 |
| HSP1589_CC1 | HSP251_CC1  | 8  | 912 | 74  | 54799 | 33.2813864 | 7.97E-09 | 3.33E-05 |
| HSP1590_CC1 | HSP251_CC1  | 7  | 913 | 92  | 54781 | 17.976251  | 2.24E-05 | 3.33E-05 |
| HSP1333_CC1 | HSP252_CC1  | 12 | 916 | 157 | 54708 | 30.639873  | 3.11E-08 | 3.33E-05 |
| HSP1334_CC1 | HSP252_CC1  | 16 | 912 | 175 | 54690 | 52.8152098 | 3.66E-13 | 3.33E-05 |
| HSP1335_CC1 | HSP252_CC1  | 20 | 908 | 194 | 54671 | 77.5183176 | 0        | 3.33E-05 |
| HSP1336_CC1 | HSP252_CC1  | 22 | 906 | 195 | 54670 | 95.6628499 | 0        | 3.33E-05 |
| HSP1337_CC1 | HSP252_CC1  | 23 | 905 | 180 | 54685 | 116.401038 | 0        | 3.33E-05 |
| HSP1338_CC1 | HSP252_CC1  | 23 | 905 | 172 | 54693 | 122.807712 | 0        | 3.33E-05 |
| HSP1339_CC1 | HSP252_CC1  | 23 | 905 | 154 | 54711 | 139.383163 | 0        | 3.33E-05 |
| HSP1340_CC1 | HSP252_CC1  | 20 | 908 | 124 | 54741 | 131.929257 | 0        | 3.33E-05 |
| HSP1341_CC2 | HSP252_CC1  | 16 | 912 | 96  | 54769 | 109.318145 | 0        | 3.33E-05 |
| HSP1589_CC1 | HSP252_CC1  | 8  | 920 | 74  | 54791 | 32.8826637 | 9.79E-09 | 3.33E-05 |
| HSP1590_CC1 | HSP252_CC1  | 7  | 921 | 92  | 54773 | 17.7297302 | 2.55E-05 | 3.33E-05 |
| HSP1333_CC1 | HSP253_CC1  | 13 | 910 | 156 | 54714 | 37.9848193 | 7.13E-10 | 3.33E-05 |
| HSP1334_CC1 | HSP253_CC1  | 17 | 906 | 174 | 54696 | 61.8536552 | 3.66E-15 | 3.33E-05 |
| HSP1335_CC1 | HSP253_CC1  | 21 | 902 | 193 | 54677 | 87.8927958 | 0        | 3.33E-05 |
| HSP1336_CC1 | HSP253_CC1  | 23 | 900 | 194 | 54676 | 107.130033 | 0        | 3.33E-05 |

|             |            |    |     |     |       |            |          |          |
|-------------|------------|----|-----|-----|-------|------------|----------|----------|
| HSP1337_CC1 | HSP253_CC1 | 24 | 899 | 179 | 54691 | 129.479546 | 0        | 3.33E-05 |
| HSP1338_CC1 | HSP253_CC1 | 24 | 899 | 171 | 54699 | 136.505882 | 0        | 3.33E-05 |
| HSP1339_CC1 | HSP253_CC1 | 24 | 899 | 153 | 54717 | 154.680034 | 0        | 3.33E-05 |
| HSP1340_CC1 | HSP253_CC1 | 21 | 902 | 123 | 54747 | 148.332988 | 0        | 3.33E-05 |
| HSP1341_CC2 | HSP253_CC1 | 17 | 906 | 95  | 54775 | 126.165132 | 0        | 3.33E-05 |
| HSP1589_CC1 | HSP253_CC1 | 8  | 915 | 74  | 54796 | 33.1310349 | 8.62E-09 | 3.33E-05 |
| HSP1590_CC1 | HSP253_CC1 | 8  | 915 | 91  | 54779 | 25.1753437 | 5.23E-07 | 3.33E-05 |
| HSP1333_CC1 | HSP254_CC1 | 13 | 900 | 156 | 54724 | 38.6221444 | 5.14E-10 | 3.33E-05 |
| HSP1334_CC1 | HSP254_CC1 | 17 | 896 | 174 | 54706 | 62.8294046 | 2.22E-15 | 3.33E-05 |
| HSP1335_CC1 | HSP254_CC1 | 21 | 892 | 193 | 54687 | 89.2300445 | 0        | 3.33E-05 |
| HSP1336_CC1 | HSP254_CC1 | 23 | 890 | 194 | 54686 | 108.718074 | 0        | 3.33E-05 |
| HSP1337_CC1 | HSP254_CC1 | 24 | 889 | 179 | 54701 | 131.335653 | 0        | 3.33E-05 |
| HSP1338_CC1 | HSP254_CC1 | 24 | 889 | 171 | 54709 | 138.440528 | 0        | 3.33E-05 |
| HSP1339_CC1 | HSP254_CC1 | 23 | 890 | 154 | 54726 | 142.307322 | 0        | 3.33E-05 |
| HSP1340_CC1 | HSP254_CC1 | 20 | 893 | 124 | 54756 | 134.650385 | 0        | 3.33E-05 |
| HSP1341_CC2 | HSP254_CC1 | 16 | 897 | 96  | 54784 | 111.55751  | 0        | 3.33E-05 |
| HSP1589_CC1 | HSP254_CC1 | 9  | 904 | 73  | 54807 | 44.4986527 | 2.55E-11 | 3.33E-05 |
| HSP1590_CC1 | HSP254_CC1 | 9  | 904 | 90  | 54790 | 34.2387929 | 4.87E-09 | 3.33E-05 |
| HSP1591_CC1 | HSP254_CC1 | 8  | 905 | 96  | 54784 | 23.7397322 | 1.10E-06 | 3.33E-05 |
| HSP1333_CC1 | HSP255_CC1 | 12 | 879 | 157 | 54745 | 32.67339   | 1.09E-08 | 3.33E-05 |
| HSP1334_CC1 | HSP255_CC1 | 16 | 875 | 175 | 54727 | 56.0627223 | 7.02E-14 | 3.33E-05 |
| HSP1335_CC1 | HSP255_CC1 | 20 | 871 | 194 | 54708 | 82.0819088 | 0        | 3.33E-05 |
| HSP1336_CC1 | HSP255_CC1 | 22 | 869 | 195 | 54707 | 101.132574 | 0        | 3.33E-05 |
| HSP1337_CC1 | HSP255_CC1 | 23 | 868 | 180 | 54722 | 122.821035 | 0        | 3.33E-05 |
| HSP1338_CC1 | HSP255_CC1 | 23 | 868 | 172 | 54730 | 129.500063 | 0        | 3.33E-05 |
| HSP1339_CC1 | HSP255_CC1 | 22 | 869 | 155 | 54747 | 132.585639 | 0        | 3.33E-05 |
| HSP1340_CC1 | HSP255_CC1 | 19 | 872 | 125 | 54777 | 123.567685 | 0        | 3.33E-05 |
| HSP1341_CC2 | HSP255_CC1 | 15 | 876 | 97  | 54805 | 99.3676807 | 0        | 3.33E-05 |
| HSP1589_CC1 | HSP255_CC1 | 9  | 882 | 73  | 54829 | 45.9648091 | 1.20E-11 | 3.33E-05 |
| HSP1590_CC1 | HSP255_CC1 | 9  | 882 | 90  | 54812 | 35.4421329 | 2.63E-09 | 3.33E-05 |
| HSP1591_CC1 | HSP255_CC1 | 8  | 883 | 96  | 54806 | 24.6338385 | 6.93E-07 | 3.33E-05 |
| HSP1333_CC1 | HSP256_CC1 | 12 | 855 | 157 | 54769 | 34.0898802 | 5.26E-09 | 3.33E-05 |
| HSP1334_CC1 | HSP256_CC1 | 16 | 851 | 175 | 54751 | 58.3225362 | 2.22E-14 | 3.33E-05 |
| HSP1335_CC1 | HSP256_CC1 | 19 | 848 | 195 | 54731 | 75.3366966 | 0        | 3.33E-05 |
| HSP1336_CC1 | HSP256_CC1 | 22 | 845 | 195 | 54731 | 104.935716 | 0        | 3.33E-05 |
| HSP1337_CC1 | HSP256_CC1 | 23 | 844 | 180 | 54746 | 127.283438 | 0        | 3.33E-05 |
| HSP1338_CC1 | HSP256_CC1 | 23 | 844 | 172 | 54754 | 134.151305 | 0        | 3.33E-05 |
| HSP1339_CC1 | HSP256_CC1 | 23 | 844 | 154 | 54772 | 151.913858 | 0        | 3.33E-05 |
| HSP1340_CC1 | HSP256_CC1 | 19 | 848 | 125 | 54801 | 127.876114 | 0        | 3.33E-05 |
| HSP1341_CC2 | HSP256_CC1 | 15 | 852 | 97  | 54829 | 102.819546 | 0        | 3.33E-05 |
| HSP1589_CC1 | HSP256_CC1 | 9  | 858 | 73  | 54853 | 47.6506721 | 5.09E-12 | 3.33E-05 |
| HSP1590_CC1 | HSP256_CC1 | 9  | 858 | 90  | 54836 | 36.8264797 | 1.29E-09 | 3.33E-05 |
| HSP1591_CC1 | HSP256_CC1 | 8  | 859 | 96  | 54830 | 25.6631044 | 4.07E-07 | 3.33E-05 |
| HSP1333_CC1 | HSP257_CC1 | 11 | 823 | 158 | 54801 | 28.9426706 | 7.46E-08 | 3.33E-05 |
| HSP1334_CC1 | HSP257_CC1 | 15 | 819 | 176 | 54783 | 52.6258517 | 4.04E-13 | 3.33E-05 |
| HSP1335_CC1 | HSP257_CC1 | 18 | 816 | 196 | 54763 | 69.7907705 | 1.11E-16 | 3.33E-05 |
| HSP1336_CC1 | HSP257_CC1 | 21 | 813 | 196 | 54763 | 99.0581537 | 0        | 3.33E-05 |
| HSP1337_CC1 | HSP257_CC1 | 22 | 812 | 181 | 54778 | 120.773507 | 0        | 3.33E-05 |

|             |             |             |    |     |     |     |       |            |          |          |
|-------------|-------------|-------------|----|-----|-----|-----|-------|------------|----------|----------|
|             | HSP1338_CC1 | HSP257_CC1  | 22 | 812 | 173 |     | 54786 | 127.300526 | 0        | 3.33E-05 |
|             | HSP1339_CC1 | HSP257_CC1  | 22 | 812 | 155 |     | 54804 | 144.181983 | 0        | 3.33E-05 |
|             | HSP1340_CC1 | HSP257_CC1  | 18 | 816 | 126 |     | 54833 | 118.750212 | 0        | 3.33E-05 |
|             | HSP1341_CC2 | HSP257_CC1  | 14 | 820 | 98  |     | 54861 | 92.3081959 | 0        | 3.33E-05 |
|             | HSP1589_CC1 | HSP257_CC1  | 9  | 825 | 73  |     | 54886 | 50.1299196 | 1.44E-12 | 3.33E-05 |
|             | HSP1590_CC1 | HSP257_CC1  | 9  | 825 | 90  |     | 54869 | 38.8635226 | 4.54E-10 | 3.33E-05 |
|             | HSP1591_CC1 | HSP257_CC1  | 8  | 826 | 96  |     | 54863 | 27.1788309 | 1.85E-07 | 3.33E-05 |
|             | HSP1593_CC1 | HSP257_CC1  | 7  | 827 | 105 |     | 54854 | 17.2337901 | 3.31E-05 | 3.33E-05 |
|             | HSP1333_CC1 | HSP258_CC1  | 12 | 780 | 157 |     | 54844 | 39.0954694 | 4.04E-10 | 3.33E-05 |
|             | HSP1334_CC1 | HSP258_CC1  | 16 | 776 | 175 |     | 54826 | 66.2955036 | 3.33E-16 | 3.33E-05 |
|             | HSP1335_CC1 | HSP258_CC1  | 20 | 772 | 194 |     | 54807 | 96.4457756 | 0        | 3.33E-05 |
|             | HSP1336_CC1 | HSP258_CC1  | 22 | 770 | 195 |     | 54806 | 118.337088 | 0        | 3.33E-05 |
|             | HSP1337_CC1 | HSP258_CC1  | 23 | 769 | 180 |     | 54821 | 142.999758 | 0        | 3.33E-05 |
|             | HSP1338_CC1 | HSP258_CC1  | 23 | 769 | 172 |     | 54829 | 150.530117 | 0        | 3.33E-05 |
|             | HSP1339_CC1 | HSP258_CC1  | 23 | 769 | 154 |     | 54847 | 169.998538 | 0        | 3.33E-05 |
|             | HSP1340_CC1 | HSP258_CC1  | 18 | 774 | 126 |     | 54875 | 126.667337 | 0        | 3.33E-05 |
|             | HSP1341_CC2 | HSP258_CC1  | 15 | 777 | 97  |     | 54904 | 114.969822 | 0        | 3.33E-05 |
|             | HSP1589_CC1 | HSP258_CC1  | 7  | 785 | 75  |     | 54926 | 29.7246402 | 4.98E-08 | 3.33E-05 |
|             | HSP1590_CC1 | HSP258_CC1  | 7  | 785 | 92  |     | 54909 | 22.6332824 | 1.96E-06 | 3.33E-05 |
|             | HSP1087_CC1 | HSP623_CC1  | 5  | 46  | 52  |     | 55690 | 470.778924 | 0        | 3.33E-05 |
|             | HSP1088_CC1 | HSP623_CC1  | 6  | 45  | 81  |     | 55661 | 441.853331 | 0        | 3.33E-05 |
|             | HSP1089_CC1 | HSP623_CC1  | 6  | 45  | 101 |     | 55641 | 357.176839 | 0        | 3.33E-05 |
|             | HSP1090_CC1 | HSP623_CC1  | 6  | 45  | 126 |     | 55616 | 287.421063 | 0        | 3.33E-05 |
|             | HSP1091_CC1 | HSP623_CC1  | 6  | 45  | 145 |     | 55597 | 249.858547 | 0        | 3.33E-05 |
|             | HSP1092_CC1 | HSP623_CC1  | 6  | 45  | 140 |     | 55602 | 258.795211 | 0        | 3.33E-05 |
| HSP1459_CC1 | HSP1795_CC2 |             | 5  |     | 9   | 698 | 55081 | 133.614776 | 0        | 3.22E-05 |
| HSP1459_CC1 | HSP1798_CC1 |             | 5  |     | 14  | 698 | 55076 | 95.906607  | 0        | 3.22E-05 |
| HSP1459_CC1 | HSP1799_CC1 |             | 5  |     | 14  | 698 | 55076 | 95.906607  | 0        | 3.22E-05 |
| HSP1460_CC1 |             | HSP1015_CC1 | 20 | 60  |     | 580 | 55133 | 431.048928 | 0        | 2.12E-05 |
| HSP1460_CC1 |             | HSP1016_CC1 | 28 | 70  |     | 572 | 55123 | 697.675676 | 0        | 2.12E-05 |
| HSP1460_CC1 |             | HSP1017_CC1 | 35 | 81  |     | 565 | 55112 | 925.087436 | 0        | 2.12E-05 |
| HSP1460_CC1 |             | HSP1018_CC1 | 36 | 89  |     | 564 | 55104 | 905.187915 | 0        | 2.12E-05 |
| HSP1460_CC1 |             | HSP1019_CC1 | 35 | 91  |     | 565 | 55102 | 846.401394 | 0        | 2.12E-05 |
| HSP1460_CC1 |             | HSP1020_CC1 | 34 | 85  |     | 566 | 55108 | 847.497159 | 0        | 2.12E-05 |
| HSP1460_CC1 |             | HSP1021_CC2 | 29 | 78  |     | 571 | 55115 | 682.658056 | 0        | 2.12E-05 |
| HSP1460_CC1 |             | HSP1023_CC2 | 18 | 57  |     | 582 | 55136 | 370.999247 | 0        | 2.12E-05 |
| HSP1460_CC1 |             | HSP1386_CC2 | 34 | 179 |     | 566 | 55014 | 445.432111 | 0        | 2.12E-05 |
| HSP1460_CC1 |             | HSP1629_CC1 | 7  | 23  |     | 593 | 55170 | 139.781129 | 0        | 2.12E-05 |
| HSP1460_CC1 | HSP1087_CC1 |             | 6  |     | 51  | 594 | 55142 | 47.9060534 | 4.47E-12 | 2.12E-05 |
| HSP1460_CC1 | HSP1088_CC1 |             | 12 |     | 75  | 588 | 55118 | 132.476334 | 0        | 3.22E-05 |
| HSP1460_CC1 | HSP1089_CC1 |             | 16 |     | 91  | 584 | 55102 | 194.082826 | 0        | 3.22E-05 |
| HSP1460_CC1 | HSP1090_CC1 |             | 18 |     | 114 | 582 | 55079 | 196.233196 | 0        | 3.22E-05 |
| HSP1460_CC1 | HSP1091_CC1 |             | 19 |     | 132 | 581 | 55061 | 188.465059 | 0        | 3.22E-05 |
| HSP1460_CC1 | HSP1092_CC1 |             | 20 |     | 126 | 580 | 55067 | 219.258145 | 0        | 3.22E-05 |
| HSP1460_CC1 | HSP1093_CC1 |             | 20 |     | 114 | 580 | 55079 | 242.198204 | 0        | 3.22E-05 |
| HSP1460_CC1 | HSP1094_CC2 |             | 20 |     | 123 | 580 | 55070 | 224.630282 | 0        | 3.22E-05 |
| HSP1460_CC1 | HSP1095_CC2 |             | 20 |     | 99  | 580 | 55094 | 277.414209 | 0        | 3.22E-05 |
| HSP1460_CC1 | HSP1096_CC2 |             | 12 |     | 58  | 588 | 55135 | 170.083248 | 0        | 3.22E-05 |

|             |             |   |    |     |       |            |   |          |
|-------------|-------------|---|----|-----|-------|------------|---|----------|
| HSP1460_CC1 | HSP1264_CC2 | 5 | 17 | 595 | 55176 | 96.9859719 | 0 | 3.22E-05 |
| HSP1460_CC1 | HSP1265_CC1 | 5 | 23 | 595 | 55170 | 74.1607559 | 0 | 3.22E-05 |
| HSP1460_CC1 | HSP1795_CC2 | 5 | 9  | 595 | 55184 | 157.938837 | 0 | 3.22E-05 |
| HSP1460_CC1 | HSP1798_CC1 | 5 | 14 | 595 | 55179 | 113.819763 | 0 | 3.22E-05 |
| HSP1460_CC1 | HSP1799_CC1 | 5 | 14 | 595 | 55179 | 113.819763 | 0 | 3.22E-05 |
